# Supplementary material
Source: publisher figshare collection journal article supplement (https://acs.figshare.com/ndownloader/files/6927704)
Supplement: Supplementary file 1 [file 6927704]

 
data_x16179_sq 
  
_audit_creation_method            SHELXL-2014/6 
_chemical_name_systematic         ? 
_chemical_name_common             ? 
_chemical_melting_point           ? 
_chemical_formula_moiety          ? 
_chemical_formula_sum 
 'C60 H72 Cl F5 Mo N O P' 
_chemical_formula_weight          1080.54 
  
loop_ 
 _atom_type_symbol 
 _atom_type_description 
 _atom_type_scat_dispersion_real 
 _atom_type_scat_dispersion_imag 
 _atom_type_scat_source 
 'C'  'C'   0.0033   0.0016 
 'International Tables Vol C Tables 4.2.6.8 and 6.1.1.4' 
 'H'  'H'   0.0000   0.0000 
 'International Tables Vol C Tables 4.2.6.8 and 6.1.1.4' 
 'N'  'N'   0.0061   0.0033 
 'International Tables Vol C Tables 4.2.6.8 and 6.1.1.4' 
 'O'  'O'   0.0106   0.0060 
 'International Tables Vol C Tables 4.2.6.8 and 6.1.1.4' 
 'F'  'F'   0.0171   0.0103 
 'International Tables Vol C Tables 4.2.6.8 and 6.1.1.4' 
 'P'  'P'   0.1023   0.0942 
 'International Tables Vol C Tables 4.2.6.8 and 6.1.1.4' 
 'Cl'  'Cl'   0.1484   0.1585 
 'International Tables Vol C Tables 4.2.6.8 and 6.1.1.4' 
 'Mo'  'Mo'  -1.6832   0.6857 
 'International Tables Vol C Tables 4.2.6.8 and 6.1.1.4' 
  
_space_group_crystal_system       monoclinic 
_space_group_IT_number            14 
_space_group_name_H-M_alt         'P 21/n' 
_space_group_name_Hall            '-P 2yn' 
  
_shelx_space_group_comment 
; 
The symmetry employed for this shelxl refinement is uniquely defined 
by the following loop, which should always be used as a source of 
symmetry information in preference to the above space-group names. 
They are only intended as comments. 
; 
  
loop_ 
 _space_group_symop_operation_xyz 
 'x, y, z' 
 '-x+1/2, y+1/2, -z+1/2' 
 '-x, -y, -z' 
 'x-1/2, -y-1/2, z-1/2' 
  
_cell_length_a                    12.9558(11) 
_cell_length_b                    27.591(2) 
_cell_length_c                    20.4711(16) 
_cell_angle_alpha                 90 
_cell_angle_beta                  94.7881(16) 
_cell_angle_gamma                 90 
_cell_volume                      7292.1(10) 
_cell_formula_units_Z             4 
_cell_measurement_temperature     100(2) 
_cell_measurement_reflns_used     9826 
_cell_measurement_theta_min       2.32 
_cell_measurement_theta_max       31.05 
  
_exptl_crystal_description        plate 
_exptl_crystal_colour             yellow 
_exptl_crystal_density_meas       . 
_exptl_crystal_density_method     'not measured' 
_exptl_crystal_density_diffrn     0.984 
_exptl_crystal_F_000              2264 
_exptl_transmission_factor_min    ? 
_exptl_transmission_factor_max    ? 
_exptl_crystal_size_max           0.480 
_exptl_crystal_size_mid           0.375 
_exptl_crystal_size_min           0.080 
_exptl_absorpt_coefficient_mu     0.282 
_shelx_estimated_absorpt_T_min    0.877 
_shelx_estimated_absorpt_T_max    0.978 
_exptl_absorpt_correction_type    multi-scan 
_exptl_absorpt_correction_T_min   0.6860  
_exptl_absorpt_correction_T_max   0.7462  
_exptl_absorpt_process_details    'SADABS (Sheldrick, 2009)' 
_exptl_absorpt_special_details    ? 
_diffrn_ambient_temperature       100(2) 
_diffrn_radiation_wavelength      0.71073 
_diffrn_radiation_type            MoK\a 
_diffrn_source                    'I\mS micro-focus sealed tube, multilayer optics' 
_diffrn_measurement_device_type   'Bruker Smart APEX2 CCD' 
_diffrn_measurement_method        '\f and \w scans' 
_diffrn_detector_area_resol_mean  8.3 
_diffrn_reflns_number             190709 
_diffrn_reflns_av_unetI/netI      0.0314 
_diffrn_reflns_av_R_equivalents   0.0510 
_diffrn_reflns_limit_h_min        -18 
_diffrn_reflns_limit_h_max        18 
_diffrn_reflns_limit_k_min        -39 
_diffrn_reflns_limit_k_max        39 
_diffrn_reflns_limit_l_min        -29 
_diffrn_reflns_limit_l_max        28 
_diffrn_reflns_theta_min          1.241 
_diffrn_reflns_theta_max          30.508 
_diffrn_reflns_theta_full         25.242 
_diffrn_measured_fraction_theta_max   1.000 
_diffrn_measured_fraction_theta_full  1.000 
_diffrn_reflns_Laue_measured_fraction_max    1.000 
_diffrn_reflns_Laue_measured_fraction_full   1.000 
_diffrn_reflns_point_group_measured_fraction_max   1.000 
_diffrn_reflns_point_group_measured_fraction_full  1.000 
_reflns_number_total              22270 
_reflns_number_gt                 18056 
_reflns_threshold_expression      'I > 2\s(I)' 
_reflns_Friedel_coverage          0.000 
_reflns_Friedel_fraction_max      . 
_reflns_Friedel_fraction_full     . 
  
_reflns_special_details 
; 
 Reflections were merged by SHELXL according to the crystal 
 class for the calculation of statistics and refinement. 
  
 Structure factors included contributions from the .fab file. 
  
 _reflns_Friedel_fraction is defined as the number of unique 
 Friedel pairs measured divided by the number that would be 
 possible theoretically, ignoring centric projections and 
 systematic absences. 
; 
  
_computing_data_collection        'APEX2 v2011.4.0 (Bruker-AXS, 2015)' 
_computing_cell_refinement        'SAINT 7.46A (Bruker-AXS, 2015)' 
_computing_data_reduction         'SAINT 7.46A (Bruker-AXS, 2015)' 
_computing_structure_solution     'SHELXS-2015 (Sheldrick, 2015)' 
_computing_structure_refinement 'SHELXL-2014/6 (Sheldrick, 2014)' 
_computing_molecular_graphics     'Bruker SHELXTL' 
_computing_publication_material   'Bruker SHELXTL' 
_refine_special_details 
; 
 Some disorder in the ligands.

 Disordered solvent can be modeled, but not well (files for 
 the solvent disorder model exist).  

 Bruker X8 Kappa DUO four-circle diffractometer, Bruker APEX2 CCD. 
 The instrument was purchased with the help of funding from the 
 National Science Foundation (NSF) under Grant Number 
 CHE-0946721.  Please acknowledge this grant in all publications 
 of this structure. 
; 
_refine_ls_structure_factor_coef  Fsqd 
_refine_ls_matrix_type            full 
_refine_ls_weighting_scheme       calc 
_refine_ls_weighting_details 
'w=1/[\s^2^(Fo^2^)+(0.0325P)^2^+2.9798P] where P=(Fo^2^+2Fc^2^)/3' 
_atom_sites_solution_primary      direct 
_atom_sites_solution_secondary    difmap 
_atom_sites_solution_hydrogens    mixed 
_refine_ls_hydrogen_treatment     mixed 
_refine_ls_extinction_method      none 
_refine_ls_extinction_coef        . 
_refine_ls_number_reflns          22270 
_refine_ls_number_parameters      845 
_refine_ls_number_restraints      1318 
_refine_ls_R_factor_all           0.0437 
_refine_ls_R_factor_gt            0.0317 
_refine_ls_wR_factor_ref          0.0809 
_refine_ls_wR_factor_gt           0.0754 
_refine_ls_goodness_of_fit_ref    1.014 
_refine_ls_restrained_S_all       0.993 
_refine_ls_shift/su_max           0.007 
_refine_ls_shift/su_mean          0.000 
  
loop_ 
 _atom_site_label 
 _atom_site_type_symbol 
 _atom_site_fract_x 
 _atom_site_fract_y 
 _atom_site_fract_z 
 _atom_site_U_iso_or_equiv 
 _atom_site_adp_type 
 _atom_site_occupancy 
 _atom_site_site_symmetry_order 
 _atom_site_calc_flag 
 _atom_site_refinement_flags_posn 
 _atom_site_refinement_flags_adp 
 _atom_site_refinement_flags_occupancy 
 _atom_site_disorder_assembly 
 _atom_site_disorder_group 
Cl1 Cl 0.60932(3) 0.77920(2) 0.59464(2) 0.02339(6) Uani 1 1 d . . . . . 
Mo1 Mo 0.54034(2) 0.72612(2) 0.67332(2) 0.01698(3) Uani 1 1 d D . . . . 
C1 C 0.63462(11) 0.67484(5) 0.69162(6) 0.0226(3) Uani 1 1 d D U . . . 
H1 H 0.625(2) 0.6557(8) 0.6534(10) 0.027 Uiso 0.54(2) 1 d D U P A 1 
H1A H 0.6120(15) 0.6520(6) 0.6570(9) 0.027 Uiso 0.46(2) 1 d D U P A 2 
C3 C 0.8245(10) 0.6700(5) 0.6996(9) 0.0320(15) Uani 0.54(2) 1 d D U P A 1 
H3A H 0.8870 0.6616 0.7276 0.048 Uiso 0.54(2) 1 calc R U P A 1 
H3B H 0.8203 0.6496 0.6602 0.048 Uiso 0.54(2) 1 calc R U P A 1 
H3C H 0.8274 0.7042 0.6869 0.048 Uiso 0.54(2) 1 calc R U P A 1 
C4 C 0.7362(16) 0.6916(10) 0.8000(8) 0.0291(10) Uani 0.54(2) 1 d D U P A 1 
H4A H 0.7973 0.6815 0.8280 0.044 Uiso 0.54(2) 1 calc R U P A 1 
H4B H 0.7427 0.7259 0.7886 0.044 Uiso 0.54(2) 1 calc R U P A 1 
H4C H 0.6740 0.6870 0.8234 0.044 Uiso 0.54(2) 1 calc R U P A 1 
C3A C 0.8206(12) 0.6609(7) 0.6952(10) 0.0320(15) Uani 0.46(2) 1 d D U P A 2 
H3A1 H 0.8826 0.6494 0.7214 0.048 Uiso 0.46(2) 1 calc R U P A 2 
H3A2 H 0.8094 0.6412 0.6554 0.048 Uiso 0.46(2) 1 calc R U P A 2 
H3A3 H 0.8300 0.6949 0.6832 0.048 Uiso 0.46(2) 1 calc R U P A 2 
C4A C 0.743(2) 0.6896(12) 0.7962(10) 0.0291(10) Uani 0.46(2) 1 d D U P A 2 
H4A1 H 0.8023 0.6775 0.8247 0.044 Uiso 0.46(2) 1 calc R U P A 2 
H4A2 H 0.7582 0.7226 0.7818 0.044 Uiso 0.46(2) 1 calc R U P A 2 
H4A3 H 0.6813 0.6899 0.8204 0.044 Uiso 0.46(2) 1 calc R U P A 2 
C2 C 0.7276(7) 0.6613(4) 0.7376(5) 0.0239(6) Uani 0.54(2) 1 d D U P A 1 
C5 C 0.7234(6) 0.6075(4) 0.7549(4) 0.0260(13) Uani 0.54(2) 1 d D U P A 1 
C6 C 0.6961(9) 0.5732(3) 0.7067(4) 0.037(2) Uani 0.54(2) 1 d D U P A 1 
H6 H 0.6792 0.5838 0.6630 0.045 Uiso 0.54(2) 1 calc R U P A 1 
C7 C 0.6927(10) 0.5240(3) 0.7203(4) 0.051(2) Uani 0.54(2) 1 d D U P A 1 
H7 H 0.6746 0.5016 0.6860 0.061 Uiso 0.54(2) 1 calc R U P A 1 
C8 C 0.7155(9) 0.5074(2) 0.7833(4) 0.0465(16) Uani 0.54(2) 1 d D U P A 1 
H8 H 0.7125 0.4737 0.7929 0.056 Uiso 0.54(2) 1 calc R U P A 1 
C9 C 0.7425(8) 0.5404(2) 0.8319(3) 0.0392(13) Uani 0.54(2) 1 d D U P A 1 
H9 H 0.7589 0.5294 0.8756 0.047 Uiso 0.54(2) 1 calc R U P A 1 
C10 C 0.7461(7) 0.5897(2) 0.8180(4) 0.0309(11) Uani 0.54(2) 1 d D U P A 1 
H10 H 0.7645 0.6118 0.8526 0.037 Uiso 0.54(2) 1 calc R U P A 1 
C2A C 0.7254(9) 0.6564(5) 0.7359(7) 0.0239(6) Uani 0.46(2) 1 d D U P A 2 
C5A C 0.7080(7) 0.6027(4) 0.7528(5) 0.0233(13) Uani 0.46(2) 1 d D U P A 2 
C6A C 0.6844(9) 0.5688(4) 0.7033(5) 0.0288(16) Uani 0.46(2) 1 d D U P A 2 
H6A H 0.6788 0.5792 0.6589 0.035 Uiso 0.46(2) 1 calc R U P A 2 
C7A C 0.6689(10) 0.5204(4) 0.7172(4) 0.0379(16) Uani 0.46(2) 1 d D U P A 2 
H7A H 0.6525 0.4981 0.6825 0.046 Uiso 0.46(2) 1 calc R U P A 2 
C8A C 0.6771(12) 0.5045(3) 0.7810(4) 0.050(2) Uani 0.46(2) 1 d D U P A 2 
H8A H 0.6674 0.4712 0.7906 0.061 Uiso 0.46(2) 1 calc R U P A 2 
C9A C 0.6995(14) 0.5371(3) 0.8308(4) 0.052(2) Uani 0.46(2) 1 d D U P A 2 
H9A H 0.7048 0.5263 0.8750 0.062 Uiso 0.46(2) 1 calc R U P A 2 
C10A C 0.7146(11) 0.5857(3) 0.8172(4) 0.041(2) Uani 0.46(2) 1 d D U P A 2 
H10A H 0.7297 0.6078 0.8523 0.049 Uiso 0.46(2) 1 calc R U P A 2 
P1 P 0.41277(3) 0.68466(2) 0.74043(2) 0.02192(7) Uani 1 1 d . . . . . 
C21 C 0.29539(12) 0.71936(6) 0.74757(7) 0.0321(3) Uani 1 1 d . . . . . 
H21A H 0.2478 0.7007 0.7726 0.048 Uiso 1 1 calc R U . . . 
H21B H 0.2623 0.7262 0.7037 0.048 Uiso 1 1 calc R U . . . 
H21C H 0.3126 0.7500 0.7702 0.048 Uiso 1 1 calc R U . . . 
C22 C 0.36868(13) 0.62795(6) 0.70440(7) 0.0321(3) Uani 1 1 d . . . . . 
H22A H 0.4275 0.6058 0.7029 0.048 Uiso 1 1 calc R U . . . 
H22B H 0.3375 0.6337 0.6598 0.048 Uiso 1 1 calc R U . . . 
H22C H 0.3170 0.6136 0.7309 0.048 Uiso 1 1 calc R U . . . 
C23 C 0.46105(11) 0.67043(5) 0.82381(6) 0.0234(3) Uani 1 1 d . . . . . 
C24 C 0.47815(12) 0.70752(5) 0.86970(6) 0.0274(3) Uani 1 1 d . . . . . 
H24 H 0.4626 0.7401 0.8574 0.033 Uiso 1 1 calc R U . . . 
C25 C 0.51780(12) 0.69717(6) 0.93341(7) 0.0313(3) Uani 1 1 d . . . . . 
H25 H 0.5292 0.7226 0.9644 0.038 Uiso 1 1 calc R U . . . 
C26 C 0.54056(13) 0.65007(6) 0.95161(7) 0.0355(4) Uani 1 1 d . . . . . 
H26 H 0.5669 0.6430 0.9953 0.043 Uiso 1 1 calc R U . . . 
C27 C 0.52519(15) 0.61309(6) 0.90646(8) 0.0403(4) Uani 1 1 d . . . . . 
H27 H 0.5415 0.5807 0.9190 0.048 Uiso 1 1 calc R U . . . 
C28 C 0.48595(13) 0.62314(6) 0.84263(7) 0.0328(3) Uani 1 1 d . . . . . 
H28 H 0.4761 0.5976 0.8117 0.039 Uiso 1 1 calc R U . . . 
N1 N 0.57732(9) 0.76814(4) 0.73540(5) 0.0210(2) Uani 1 1 d . . . . . 
C11 C 0.60166(11) 0.81120(5) 0.76613(6) 0.0213(2) Uani 1 1 d . . . . . 
C12 C 0.70218(11) 0.83026(5) 0.76700(6) 0.0245(3) Uani 1 1 d . . . . . 
F1 F 0.77483(7) 0.80606(3) 0.73829(4) 0.03027(18) Uani 1 1 d . . . . . 
C13 C 0.72797(12) 0.87398(5) 0.79656(7) 0.0293(3) Uani 1 1 d . . . . . 
F2 F 0.82482(8) 0.89109(3) 0.79623(5) 0.0403(2) Uani 1 1 d . . . . . 
C14 C 0.65433(14) 0.90004(5) 0.82635(7) 0.0324(3) Uani 1 1 d . . . . . 
F3 F 0.67978(9) 0.94192(3) 0.85631(5) 0.0479(3) Uani 1 1 d . . . . . 
C15 C 0.55536(13) 0.88236(5) 0.82645(7) 0.0318(3) Uani 1 1 d . . . . . 
F4 F 0.48469(8) 0.90731(4) 0.85677(5) 0.0462(3) Uani 1 1 d . . . . . 
C16 C 0.52915(12) 0.83888(5) 0.79650(7) 0.0259(3) Uani 1 1 d . . . . . 
F5 F 0.43173(7) 0.82269(3) 0.79694(4) 0.03306(19) Uani 1 1 d . . . . . 
O1 O 0.45084(7) 0.70098(3) 0.59849(4) 0.01730(17) Uani 1 1 d . . . . . 
C31 C 0.43111(10) 0.70864(4) 0.53328(6) 0.0172(2) Uani 1 1 d D . . . . 
C32 C 0.49525(10) 0.68735(4) 0.48893(6) 0.0171(2) Uani 1 1 d D . . . . 
C37 C 0.57799(10) 0.65052(4) 0.50755(6) 0.0171(2) Uani 1 1 d D . . . . 
C38 C 0.68271(10) 0.65966(4) 0.49813(6) 0.0181(2) Uani 1 1 d D . . . . 
C39 C 0.75468(10) 0.62213(5) 0.50735(6) 0.0209(2) Uani 1 1 d D . . . . 
H39 H 0.8251 0.6285 0.5008 0.025 Uiso 1 1 calc R U . . . 
C40 C 0.72696(10) 0.57582(4) 0.52578(6) 0.0198(2) Uani 1 1 d D . . . . 
C41 C 0.62337(10) 0.56761(4) 0.53563(6) 0.0195(2) Uani 1 1 d D . . . . 
H41 H 0.6032 0.5362 0.5487 0.023 Uiso 1 1 calc R U . . . 
C42 C 0.54827(10) 0.60367(4) 0.52708(6) 0.0180(2) Uani 1 1 d D . . . . 
C43 C 0.72086(10) 0.70882(5) 0.47687(6) 0.0208(2) Uani 1 1 d D . . . . 
H43 H 0.6628 0.7325 0.4786 0.025 Uiso 1 1 calc R U . . . 
C44 C 0.75210(13) 0.70719(6) 0.40632(7) 0.0316(3) Uani 1 1 d D . . . . 
H44A H 0.8108 0.6850 0.4039 0.047 Uiso 1 1 calc R U . . . 
H44B H 0.7721 0.7397 0.3929 0.047 Uiso 1 1 calc R U . . . 
H44C H 0.6934 0.6958 0.3770 0.047 Uiso 1 1 calc R U . . . 
C45 C 0.81232(11) 0.72692(5) 0.52266(7) 0.0260(3) Uani 1 1 d D . . . . 
H45A H 0.7920 0.7283 0.5677 0.039 Uiso 1 1 calc R U . . . 
H45B H 0.8325 0.7593 0.5089 0.039 Uiso 1 1 calc R U . . . 
H45C H 0.8709 0.7047 0.5207 0.039 Uiso 1 1 calc R U . . . 
C46 C 0.80552(11) 0.53502(5) 0.53428(7) 0.0244(3) Uani 1 1 d D . . . . 
H46 H 0.7685 0.5058 0.5492 0.029 Uiso 1 1 calc R U . . . 
C47 C 0.89338(12) 0.54629(6) 0.58644(8) 0.0350(3) Uani 1 1 d D . . . . 
H47A H 0.9320 0.5746 0.5729 0.053 Uiso 1 1 calc R U . . . 
H47B H 0.9400 0.5183 0.5917 0.053 Uiso 1 1 calc R U . . . 
H47C H 0.8645 0.5532 0.6282 0.053 Uiso 1 1 calc R U . . . 
C48 C 0.84874(13) 0.52221(6) 0.46926(8) 0.0356(3) Uani 1 1 d D . . . . 
H48A H 0.7914 0.5159 0.4360 0.053 Uiso 1 1 calc R U . . . 
H48B H 0.8922 0.4932 0.4750 0.053 Uiso 1 1 calc R U . . . 
H48C H 0.8904 0.5493 0.4550 0.053 Uiso 1 1 calc R U . . . 
C49 C 0.43559(10) 0.59150(5) 0.53569(7) 0.0224(3) Uani 1 1 d D . . . . 
H49 H 0.4051 0.6199 0.5575 0.027 Uiso 1 1 calc R U . . . 
C50 C 0.42220(11) 0.54731(5) 0.57931(7) 0.0274(3) Uani 1 1 d D . . . . 
H50A H 0.4386 0.5178 0.5556 0.041 Uiso 1 1 calc R U . . . 
H50B H 0.3504 0.5458 0.5910 0.041 Uiso 1 1 calc R U . . . 
H50C H 0.4690 0.5501 0.6193 0.041 Uiso 1 1 calc R U . . . 
C51 C 0.37287(12) 0.58428(5) 0.46960(8) 0.0309(3) Uani 1 1 d D . . . . 
H51A H 0.3748 0.6141 0.4437 0.046 Uiso 1 1 calc R U . . . 
H51B H 0.3009 0.5766 0.4770 0.046 Uiso 1 1 calc R U . . . 
H51C H 0.4027 0.5576 0.4459 0.046 Uiso 1 1 calc R U . . . 
C33 C 0.47460(11) 0.69767(5) 0.42235(6) 0.0220(3) Uani 1 1 d D . . . . 
H33 H 0.5185 0.6844 0.3920 0.026 Uiso 1 1 calc R U . . . 
C34 C 0.39263(11) 0.72651(5) 0.39923(6) 0.0254(3) Uani 1 1 d . . . . . 
H34 H 0.3815 0.7338 0.3538 0.030 Uiso 1 1 calc R U . . . 
C35 C 0.32641(11) 0.74484(5) 0.44331(6) 0.0252(3) Uani 1 1 d D . . . . 
H35 H 0.2684 0.7638 0.4275 0.030 Uiso 1 1 calc R U . . . 
C36 C 0.34381(10) 0.73585(5) 0.51052(6) 0.0209(2) Uani 1 1 d D U . . . 
C52 C 0.2621(3) 0.75152(15) 0.5542(2) 0.0188(7) Uani 0.715(7) 1 d D U P B 1 
C53 C 0.2652(3) 0.79911(14) 0.5791(2) 0.0206(6) Uani 0.715(7) 1 d D U P B 1 
C54 C 0.1846(3) 0.81512(13) 0.61518(16) 0.0222(6) Uani 0.715(7) 1 d D U P B 1 
H54 H 0.1869 0.8472 0.6322 0.027 Uiso 0.715(7) 1 calc R U P B 1 
C55 C 0.1016(2) 0.78552(13) 0.62684(13) 0.0216(6) Uani 0.715(7) 1 d D U P B 1 
C56 C 0.1013(2) 0.73859(13) 0.60288(16) 0.0211(6) Uani 0.715(7) 1 d D U P B 1 
H56 H 0.0451 0.7179 0.6108 0.025 Uiso 0.715(7) 1 calc R U P B 1 
C57 C 0.1805(3) 0.72057(14) 0.5676(2) 0.0195(6) Uani 0.715(7) 1 d D U P B 1 
C58 C 0.3519(3) 0.83351(17) 0.5652(2) 0.0248(7) Uani 0.715(7) 1 d D U P B 1 
H58 H 0.4093 0.8136 0.5494 0.030 Uiso 0.715(7) 1 calc R U P B 1 
C59 C 0.3168(5) 0.8691(3) 0.5104(4) 0.0445(11) Uani 0.715(7) 1 d D U P B 1 
H59A H 0.3742 0.8909 0.5024 0.067 Uiso 0.715(7) 1 calc R U P B 1 
H59B H 0.2958 0.8510 0.4702 0.067 Uiso 0.715(7) 1 calc R U P B 1 
H59C H 0.2581 0.8881 0.5234 0.067 Uiso 0.715(7) 1 calc R U P B 1 
C60 C 0.3955(3) 0.86069(16) 0.6265(2) 0.0389(8) Uani 0.715(7) 1 d D U P B 1 
H60A H 0.4511 0.8824 0.6151 0.058 Uiso 0.715(7) 1 calc R U P B 1 
H60B H 0.3403 0.8797 0.6441 0.058 Uiso 0.715(7) 1 calc R U P B 1 
H60C H 0.4231 0.8374 0.6596 0.058 Uiso 0.715(7) 1 calc R U P B 1 
C61 C 0.0149(2) 0.80329(12) 0.66653(11) 0.0274(6) Uani 0.715(7) 1 d D U P B 1 
H61 H -0.0436 0.7796 0.6606 0.033 Uiso 0.715(7) 1 calc R U P B 1 
C62 C 0.0503(8) 0.8057(4) 0.7394(3) 0.0445(15) Uani 0.715(7) 1 d D U P B 1 
H62A H 0.0771 0.7740 0.7542 0.067 Uiso 0.715(7) 1 calc R U P B 1 
H62B H 0.1051 0.8301 0.7466 0.067 Uiso 0.715(7) 1 calc R U P B 1 
H62C H -0.0084 0.8146 0.7641 0.067 Uiso 0.715(7) 1 calc R U P B 1 
C63 C -0.0261(4) 0.85273(16) 0.6449(2) 0.0639(14) Uani 0.715(7) 1 d D U P B 1 
H63A H -0.0815 0.8624 0.6719 0.096 Uiso 0.715(7) 1 calc R U P B 1 
H63B H 0.0302 0.8765 0.6499 0.096 Uiso 0.715(7) 1 calc R U P B 1 
H63C H -0.0533 0.8513 0.5988 0.096 Uiso 0.715(7) 1 calc R U P B 1 
C64 C 0.1750(5) 0.66881(15) 0.5421(3) 0.0266(7) Uani 0.715(7) 1 d D U P B 1 
H64 H 0.2473 0.6579 0.5362 0.032 Uiso 0.715(7) 1 calc R U P B 1 
C65 C 0.1279(5) 0.63322(15) 0.5887(3) 0.0418(10) Uani 0.715(7) 1 d D U P B 1 
H65A H 0.1266 0.6006 0.5695 0.063 Uiso 0.715(7) 1 calc R U P B 1 
H65B H 0.1699 0.6329 0.6308 0.063 Uiso 0.715(7) 1 calc R U P B 1 
H65C H 0.0571 0.6433 0.5956 0.063 Uiso 0.715(7) 1 calc R U P B 1 
C66 C 0.1126(7) 0.6663(3) 0.4751(3) 0.0351(11) Uani 0.715(7) 1 d D U P B 1 
H66A H 0.1100 0.6326 0.4596 0.053 Uiso 0.715(7) 1 calc R U P B 1 
H66B H 0.0420 0.6779 0.4793 0.053 Uiso 0.715(7) 1 calc R U P B 1 
H66C H 0.1457 0.6866 0.4437 0.053 Uiso 0.715(7) 1 calc R U P B 1 
C52A C 0.2754(8) 0.7607(4) 0.5563(6) 0.0168(17) Uani 0.285(7) 1 d D U P B 2 
C53A C 0.2863(7) 0.8092(3) 0.5756(5) 0.0153(14) Uani 0.285(7) 1 d D U P B 2 
C54A C 0.2090(6) 0.8287(3) 0.6127(4) 0.0199(14) Uani 0.285(7) 1 d D U P B 2 
H54A H 0.2158 0.8612 0.6277 0.024 Uiso 0.285(7) 1 calc R U P B 2 
C55A C 0.1248(6) 0.8024(3) 0.6277(3) 0.0200(13) Uani 0.285(7) 1 d D U P B 2 
C56A C 0.1151(6) 0.7552(3) 0.6075(4) 0.0215(14) Uani 0.285(7) 1 d D U P B 2 
H56A H 0.0571 0.7368 0.6185 0.026 Uiso 0.285(7) 1 calc R U P B 2 
C57A C 0.1896(9) 0.7336(3) 0.5707(6) 0.0214(17) Uani 0.285(7) 1 d D U P B 2 
C58A C 0.3732(9) 0.8407(4) 0.5565(6) 0.0258(17) Uani 0.285(7) 1 d D U P B 2 
H58A H 0.4274 0.8191 0.5400 0.031 Uiso 0.285(7) 1 calc R U P B 2 
C59A C 0.3358(12) 0.8747(7) 0.5010(8) 0.041(3) Uani 0.285(7) 1 d D U P B 2 
H59D H 0.3936 0.8950 0.4892 0.061 Uiso 0.285(7) 1 calc R U P B 2 
H59E H 0.3093 0.8557 0.4629 0.061 Uiso 0.285(7) 1 calc R U P B 2 
H59F H 0.2805 0.8955 0.5153 0.061 Uiso 0.285(7) 1 calc R U P B 2 
C60A C 0.4243(8) 0.8700(3) 0.6147(5) 0.0383(19) Uani 0.285(7) 1 d D U P B 2 
H60D H 0.4803 0.8899 0.5997 0.057 Uiso 0.285(7) 1 calc R U P B 2 
H60E H 0.3724 0.8910 0.6324 0.057 Uiso 0.285(7) 1 calc R U P B 2 
H60F H 0.4526 0.8477 0.6489 0.057 Uiso 0.285(7) 1 calc R U P B 2 
C61A C 0.0425(5) 0.8257(4) 0.6680(3) 0.0352(17) Uani 0.285(7) 1 d D U P B 2 
H61A H 0.0647 0.8598 0.6782 0.042 Uiso 0.285(7) 1 calc R U P B 2 
C62A C 0.0411(18) 0.7982(10) 0.7336(8) 0.051(5) Uani 0.285(7) 1 d D U P B 2 
H62D H 0.1109 0.7981 0.7562 0.077 Uiso 0.285(7) 1 calc R U P B 2 
H62E H -0.0068 0.8142 0.7612 0.077 Uiso 0.285(7) 1 calc R U P B 2 
H62F H 0.0185 0.7647 0.7251 0.077 Uiso 0.285(7) 1 calc R U P B 2 
C63A C -0.0600(6) 0.8277(5) 0.6303(4) 0.051(2) Uani 0.285(7) 1 d D U P B 2 
H63D H -0.1104 0.8427 0.6573 0.077 Uiso 0.285(7) 1 calc R U P B 2 
H63E H -0.0549 0.8470 0.5905 0.077 Uiso 0.285(7) 1 calc R U P B 2 
H63F H -0.0826 0.7948 0.6183 0.077 Uiso 0.285(7) 1 calc R U P B 2 
C64A C 0.1769(10) 0.6812(3) 0.5494(6) 0.0231(17) Uani 0.285(7) 1 d D U P B 2 
H64A H 0.2486 0.6680 0.5482 0.028 Uiso 0.285(7) 1 calc R U P B 2 
C65A C 0.1232(11) 0.6485(4) 0.5967(6) 0.037(2) Uani 0.285(7) 1 d D U P B 2 
H65D H 0.1184 0.6154 0.5791 0.056 Uiso 0.285(7) 1 calc R U P B 2 
H65E H 0.1634 0.6482 0.6394 0.056 Uiso 0.285(7) 1 calc R U P B 2 
H65F H 0.0535 0.6609 0.6019 0.056 Uiso 0.285(7) 1 calc R U P B 2 
C66A C 0.1253(18) 0.6757(7) 0.4793(8) 0.038(3) Uani 0.285(7) 1 d D U P B 2 
H66D H 0.1190 0.6412 0.4682 0.056 Uiso 0.285(7) 1 calc R U P B 2 
H66E H 0.0562 0.6904 0.4767 0.056 Uiso 0.285(7) 1 calc R U P B 2 
H66F H 0.1677 0.6919 0.4484 0.056 Uiso 0.285(7) 1 calc R U P B 2 
  
loop_ 
 _atom_site_aniso_label 
 _atom_site_aniso_U_11 
 _atom_site_aniso_U_22 
 _atom_site_aniso_U_33 
 _atom_site_aniso_U_23 
 _atom_site_aniso_U_13 
 _atom_site_aniso_U_12 
Cl1 0.02716(16) 0.02354(14) 0.01998(14) -0.00033(11) 0.00494(12) -0.00272(12) 
Mo1 0.02088(5) 0.01872(5) 0.01125(5) -0.00202(4) 0.00079(4) 0.00284(4) 
C1 0.0268(7) 0.0242(6) 0.0164(6) -0.0019(5) 0.0006(5) 0.0040(5) 
C3 0.0298(11) 0.040(4) 0.026(2) 0.003(3) 0.0015(11) 0.0068(19) 
C4 0.030(2) 0.0348(18) 0.0210(15) -0.0047(11) -0.0060(14) 0.0077(16) 
C3A 0.0298(11) 0.040(4) 0.026(2) 0.003(3) 0.0015(11) 0.0068(19) 
C4A 0.030(2) 0.0348(18) 0.0210(15) -0.0047(11) -0.0060(14) 0.0077(16) 
C2 0.0264(7) 0.0261(17) 0.0187(7) -0.0014(10) -0.0008(6) 0.0072(9) 
C5 0.030(2) 0.029(2) 0.020(2) -0.0030(15) 0.0043(18) 0.0065(19) 
C6 0.059(4) 0.026(2) 0.025(3) 0.0030(19) -0.003(2) 0.015(2) 
C7 0.085(6) 0.027(2) 0.040(3) -0.0096(17) -0.005(3) 0.011(3) 
C8 0.067(5) 0.0275(19) 0.044(2) 0.0068(15) 0.002(3) 0.005(2) 
C9 0.053(4) 0.0361(18) 0.0286(17) 0.0090(13) 0.002(2) 0.003(2) 
C10 0.038(3) 0.0298(17) 0.0239(17) 0.0037(12) -0.0019(18) 0.0025(17) 
C2A 0.0264(7) 0.0261(17) 0.0187(7) -0.0014(10) -0.0008(6) 0.0072(9) 
C5A 0.027(2) 0.022(2) 0.021(2) 0.0018(17) -0.0010(19) 0.009(2) 
C6A 0.036(3) 0.031(3) 0.020(3) -0.0090(19) 0.001(2) 0.007(2) 
C7A 0.049(4) 0.030(3) 0.034(3) 0.000(2) -0.004(2) 0.004(2) 
C8A 0.071(6) 0.033(2) 0.046(3) 0.0064(18) -0.001(3) 0.005(3) 
C9A 0.075(6) 0.044(2) 0.035(2) 0.0137(18) -0.002(3) 0.006(3) 
C10A 0.058(6) 0.041(3) 0.023(2) -0.0022(17) 0.001(3) 0.007(3) 
P1 0.02624(18) 0.02684(16) 0.01284(14) 0.00088(12) 0.00261(13) 0.00191(13) 
C21 0.0287(8) 0.0470(9) 0.0206(6) 0.0030(6) 0.0030(6) 0.0095(6) 
C22 0.0408(9) 0.0353(8) 0.0204(6) -0.0006(5) 0.0036(6) -0.0086(6) 
C23 0.0254(7) 0.0307(7) 0.0145(5) 0.0026(5) 0.0038(5) 0.0029(5) 
C24 0.0337(8) 0.0315(7) 0.0173(6) 0.0002(5) 0.0036(5) 0.0055(6) 
C25 0.0323(8) 0.0464(9) 0.0154(6) -0.0037(6) 0.0033(6) 0.0009(7) 
C26 0.0377(9) 0.0527(10) 0.0158(6) 0.0071(6) 0.0002(6) 0.0052(7) 
C27 0.0573(11) 0.0381(8) 0.0251(7) 0.0096(6) 0.0003(7) 0.0102(8) 
C28 0.0470(9) 0.0306(7) 0.0209(7) 0.0030(5) 0.0024(6) 0.0037(7) 
N1 0.0245(6) 0.0243(5) 0.0144(5) -0.0030(4) 0.0016(4) 0.0026(4) 
C11 0.0274(7) 0.0225(6) 0.0139(5) -0.0020(4) 0.0007(5) 0.0020(5) 
C12 0.0288(7) 0.0256(6) 0.0188(6) -0.0024(5) 0.0005(5) 0.0028(5) 
F1 0.0266(4) 0.0340(4) 0.0307(4) -0.0064(3) 0.0053(4) 0.0009(3) 
C13 0.0338(8) 0.0264(7) 0.0268(7) -0.0002(5) -0.0038(6) -0.0033(6) 
F2 0.0393(5) 0.0321(5) 0.0482(6) -0.0022(4) -0.0038(4) -0.0101(4) 
C14 0.0490(10) 0.0213(6) 0.0254(7) -0.0073(5) -0.0056(7) 0.0022(6) 
F3 0.0672(7) 0.0263(5) 0.0479(6) -0.0157(4) -0.0088(5) 0.0004(5) 
C15 0.0434(9) 0.0287(7) 0.0234(7) -0.0086(5) 0.0025(6) 0.0115(6) 
F4 0.0555(6) 0.0411(5) 0.0428(6) -0.0204(4) 0.0081(5) 0.0162(5) 
C16 0.0305(7) 0.0281(7) 0.0193(6) -0.0032(5) 0.0022(5) 0.0047(5) 
F5 0.0303(5) 0.0370(5) 0.0331(5) -0.0064(4) 0.0103(4) 0.0041(4) 
O1 0.0211(4) 0.0195(4) 0.0115(4) -0.0007(3) 0.0019(3) 0.0013(3) 
C31 0.0207(6) 0.0192(5) 0.0116(5) -0.0014(4) 0.0019(4) -0.0018(4) 
C32 0.0183(6) 0.0191(5) 0.0141(5) -0.0018(4) 0.0022(4) -0.0014(4) 
C37 0.0194(6) 0.0192(5) 0.0129(5) -0.0035(4) 0.0026(4) -0.0002(4) 
C38 0.0212(6) 0.0197(5) 0.0138(5) -0.0014(4) 0.0043(5) -0.0016(4) 
C39 0.0187(6) 0.0240(6) 0.0206(6) -0.0010(5) 0.0063(5) -0.0013(5) 
C40 0.0210(6) 0.0197(5) 0.0192(6) -0.0027(4) 0.0042(5) 0.0013(5) 
C41 0.0226(6) 0.0175(5) 0.0188(6) -0.0030(4) 0.0047(5) -0.0019(5) 
C42 0.0181(6) 0.0199(5) 0.0163(5) -0.0043(4) 0.0028(5) -0.0018(4) 
C43 0.0230(6) 0.0200(5) 0.0201(6) 0.0019(4) 0.0072(5) -0.0008(5) 
C44 0.0363(8) 0.0362(8) 0.0240(7) 0.0040(6) 0.0124(6) -0.0034(6) 
C45 0.0230(7) 0.0232(6) 0.0322(7) 0.0002(5) 0.0049(6) -0.0046(5) 
C46 0.0215(7) 0.0196(6) 0.0330(7) 0.0001(5) 0.0068(6) 0.0013(5) 
C47 0.0273(8) 0.0333(8) 0.0436(9) 0.0002(6) -0.0016(7) 0.0062(6) 
C48 0.0332(8) 0.0329(8) 0.0423(9) -0.0075(6) 0.0119(7) 0.0076(6) 
C49 0.0198(6) 0.0198(6) 0.0281(7) -0.0044(5) 0.0056(5) -0.0027(5) 
C50 0.0254(7) 0.0219(6) 0.0364(8) -0.0029(5) 0.0114(6) -0.0047(5) 
C51 0.0257(7) 0.0287(7) 0.0375(8) -0.0061(6) -0.0023(6) -0.0060(6) 
C33 0.0247(7) 0.0275(6) 0.0143(5) -0.0019(5) 0.0044(5) 0.0024(5) 
C34 0.0281(7) 0.0357(7) 0.0122(5) 0.0003(5) 0.0009(5) 0.0048(6) 
C35 0.0249(7) 0.0353(7) 0.0150(6) 0.0004(5) 0.0001(5) 0.0085(6) 
C36 0.0213(6) 0.0269(6) 0.0148(5) -0.0026(4) 0.0024(5) 0.0026(5) 
C52 0.0183(15) 0.0256(15) 0.0122(11) -0.0037(10) -0.0010(10) 0.0016(11) 
C53 0.0153(14) 0.0272(15) 0.0190(11) 0.0000(11) 0.0006(10) -0.0020(10) 
C54 0.0222(15) 0.0255(14) 0.0189(10) -0.0053(11) 0.0017(10) 0.0005(10) 
C55 0.0173(11) 0.0335(15) 0.0144(9) 0.0001(10) 0.0028(8) -0.0009(10) 
C56 0.0157(11) 0.0310(15) 0.0165(10) 0.0000(11) 0.0001(8) -0.0029(10) 
C57 0.0163(11) 0.0272(17) 0.0149(11) -0.0004(13) 0.0004(9) -0.0007(11) 
C58 0.0207(17) 0.0264(16) 0.0279(14) -0.0028(11) 0.0053(11) -0.0007(11) 
C59 0.036(2) 0.042(2) 0.057(3) 0.0161(16) 0.0093(17) -0.0049(16) 
C60 0.0291(17) 0.043(2) 0.0455(18) -0.0208(14) 0.0055(13) -0.0060(12) 
C61 0.0231(11) 0.0388(14) 0.0213(10) -0.0011(9) 0.0077(8) 0.0041(10) 
C62 0.044(3) 0.069(2) 0.0222(18) -0.0050(16) 0.0121(17) 0.0106(18) 
C63 0.064(3) 0.073(2) 0.061(2) 0.0295(19) 0.044(2) 0.045(2) 
C64 0.0228(13) 0.0241(16) 0.0326(16) -0.0068(13) 0.0006(11) -0.0023(13) 
C65 0.0419(18) 0.036(2) 0.0467(19) 0.0027(16) -0.0016(14) -0.016(2) 
C66 0.033(3) 0.042(3) 0.0293(15) -0.0119(14) -0.0016(13) -0.0065(18) 
C52A 0.010(3) 0.026(3) 0.014(3) -0.003(2) -0.005(2) 0.001(2) 
C53A 0.015(3) 0.021(3) 0.010(2) -0.003(2) 0.001(2) 0.005(2) 
C54A 0.019(3) 0.023(3) 0.017(2) -0.003(2) 0.000(2) 0.002(2) 
C55A 0.018(3) 0.027(3) 0.015(2) -0.006(2) 0.001(2) -0.003(2) 
C56A 0.019(3) 0.028(3) 0.017(2) -0.003(3) 0.001(2) -0.007(2) 
C57A 0.024(3) 0.021(3) 0.018(3) -0.002(3) -0.005(2) 0.002(2) 
C58A 0.021(4) 0.023(3) 0.034(4) 0.000(2) 0.008(3) -0.003(2) 
C59A 0.036(6) 0.039(5) 0.048(5) 0.018(4) -0.001(4) 0.000(4) 
C60A 0.037(5) 0.026(3) 0.052(4) -0.006(3) 0.003(3) -0.001(3) 
C61A 0.028(3) 0.054(4) 0.024(3) -0.010(3) 0.006(2) 0.009(3) 
C62A 0.029(6) 0.108(12) 0.019(4) -0.003(5) 0.011(4) 0.023(7) 
C63A 0.037(4) 0.089(7) 0.028(3) -0.005(4) 0.008(3) 0.021(4) 
C64A 0.015(3) 0.028(4) 0.026(3) -0.002(3) 0.001(2) -0.001(3) 
C65A 0.028(4) 0.034(5) 0.050(4) 0.000(4) -0.002(3) -0.015(4) 
C66A 0.022(5) 0.043(7) 0.047(4) -0.019(4) -0.001(3) -0.009(4) 
  
_geom_special_details 
; 
 All esds (except the esd in the dihedral angle between two l.s. planes) 
 are estimated using the full covariance matrix.  The cell esds are taken 
 into account individually in the estimation of esds in distances, angles 
 and torsion angles; correlations between esds in cell parameters are only 
 used when they are defined by crystal symmetry.  An approximate (isotropic) 
 treatment of cell esds is used for estimating esds involving l.s. planes. 
; 
  
loop_ 
 _geom_bond_atom_site_label_1 
 _geom_bond_atom_site_label_2 
 _geom_bond_distance 
 _geom_bond_site_symmetry_2 
 _geom_bond_publ_flag 
Cl1 Mo1 2.4037(3) . ? 
Mo1 N1 1.7571(11) . ? 
Mo1 C1 1.8864(13) . ? 
Mo1 O1 1.9685(9) . ? 
Mo1 P1 2.5113(4) . ? 
C1 C2A 1.512(9) . ? 
C1 C2 1.513(8) . ? 
C1 H1 0.944(14) . ? 
C1 H1A 0.975(19) . ? 
C3 C2 1.550(8) . ? 
C3 H3A 0.9800 . ? 
C3 H3B 0.9800 . ? 
C3 H3C 0.9800 . ? 
C4 C2 1.523(8) . ? 
C4 H4A 0.9800 . ? 
C4 H4B 0.9800 . ? 
C4 H4C 0.9800 . ? 
C3A C2A 1.549(10) . ? 
C3A H3A1 0.9800 . ? 
C3A H3A2 0.9800 . ? 
C3A H3A3 0.9800 . ? 
C4A C2A 1.541(10) . ? 
C4A H4A1 0.9800 . ? 
C4A H4A2 0.9800 . ? 
C4A H4A3 0.9800 . ? 
C2 C5 1.526(8) . ? 
C5 C6 1.391(8) . ? 
C5 C10 1.392(8) . ? 
C6 C7 1.387(5) . ? 
C6 H6 0.9500 . ? 
C7 C8 1.377(5) . ? 
C7 H7 0.9500 . ? 
C8 C9 1.374(5) . ? 
C8 H8 0.9500 . ? 
C9 C10 1.392(5) . ? 
C9 H9 0.9500 . ? 
C10 H10 0.9500 . ? 
C2A C5A 1.541(10) . ? 
C5A C6A 1.394(10) . ? 
C5A C10A 1.395(10) . ? 
C6A C7A 1.383(6) . ? 
C6A H6A 0.9500 . ? 
C7A C8A 1.374(6) . ? 
C7A H7A 0.9500 . ? 
C8A C9A 1.372(6) . ? 
C8A H8A 0.9500 . ? 
C9A C10A 1.387(6) . ? 
C9A H9A 0.9500 . ? 
C10A H10A 0.9500 . ? 
P1 C22 1.8024(15) . ? 
P1 C23 1.8113(13) . ? 
P1 C21 1.8133(15) . ? 
C21 H21A 0.9800 . ? 
C21 H21B 0.9800 . ? 
C21 H21C 0.9800 . ? 
C22 H22A 0.9800 . ? 
C22 H22B 0.9800 . ? 
C22 H22C 0.9800 . ? 
C23 C28 1.391(2) . ? 
C23 C24 1.3943(19) . ? 
C24 C25 1.3910(19) . ? 
C24 H24 0.9500 . ? 
C25 C26 1.377(2) . ? 
C25 H25 0.9500 . ? 
C26 C27 1.380(2) . ? 
C26 H26 0.9500 . ? 
C27 C28 1.390(2) . ? 
C27 H27 0.9500 . ? 
C28 H28 0.9500 . ? 
N1 C11 1.3688(16) . ? 
C11 C16 1.3963(18) . ? 
C11 C12 1.403(2) . ? 
C12 F1 1.3303(15) . ? 
C12 C13 1.3783(19) . ? 
C13 F2 1.3411(18) . ? 
C13 C14 1.377(2) . ? 
C14 F3 1.3365(16) . ? 
C14 C15 1.372(2) . ? 
C15 F4 1.3388(16) . ? 
C15 C16 1.377(2) . ? 
C16 F5 1.3397(17) . ? 
O1 C31 1.3548(14) . ? 
C31 C36 1.4043(18) . ? 
C31 C32 1.4092(16) . ? 
C32 C33 1.3963(17) . ? 
C32 C37 1.5028(17) . ? 
C37 C38 1.4090(17) . ? 
C37 C42 1.4159(16) . ? 
C38 C39 1.3957(18) . ? 
C38 C43 1.5196(17) . ? 
C39 C40 1.3880(17) . ? 
C39 H39 0.9500 . ? 
C40 C41 1.3921(18) . ? 
C40 C46 1.5178(18) . ? 
C41 C42 1.3924(17) . ? 
C41 H41 0.9500 . ? 
C42 C49 1.5225(17) . ? 
C43 C45 1.5320(19) . ? 
C43 C44 1.5328(18) . ? 
C43 H43 1.0000 . ? 
C44 H44A 0.9800 . ? 
C44 H44B 0.9800 . ? 
C44 H44C 0.9800 . ? 
C45 H45A 0.9800 . ? 
C45 H45B 0.9800 . ? 
C45 H45C 0.9800 . ? 
C46 C47 1.526(2) . ? 
C46 C48 1.528(2) . ? 
C46 H46 1.0000 . ? 
C47 H47A 0.9800 . ? 
C47 H47B 0.9800 . ? 
C47 H47C 0.9800 . ? 
C48 H48A 0.9800 . ? 
C48 H48B 0.9800 . ? 
C48 H48C 0.9800 . ? 
C49 C50 1.5297(18) . ? 
C49 C51 1.532(2) . ? 
C49 H49 1.0000 . ? 
C50 H50A 0.9800 . ? 
C50 H50B 0.9800 . ? 
C50 H50C 0.9800 . ? 
C51 H51A 0.9800 . ? 
C51 H51B 0.9800 . ? 
C51 H51C 0.9800 . ? 
C33 C34 1.3788(19) . ? 
C33 H33 0.9500 . ? 
C34 C35 1.3911(18) . ? 
C34 H34 0.9500 . ? 
C35 C36 1.3977(17) . ? 
C35 H35 0.9500 . ? 
C36 C52 1.506(3) . ? 
C36 C52A 1.507(6) . ? 
C52 C57 1.403(4) . ? 
C52 C53 1.407(4) . ? 
C53 C54 1.400(4) . ? 
C53 C58 1.516(4) . ? 
C54 C55 1.387(3) . ? 
C54 H54 0.9500 . ? 
C55 C56 1.385(3) . ? 
C55 C61 1.522(3) . ? 
C56 C57 1.394(4) . ? 
C56 H56 0.9500 . ? 
C57 C64 1.521(4) . ? 
C58 C60 1.530(4) . ? 
C58 C59 1.531(5) . ? 
C58 H58 1.0000 . ? 
C59 H59A 0.9800 . ? 
C59 H59B 0.9800 . ? 
C59 H59C 0.9800 . ? 
C60 H60A 0.9800 . ? 
C60 H60B 0.9800 . ? 
C60 H60C 0.9800 . ? 
C61 C63 1.516(4) . ? 
C61 C62 1.525(7) . ? 
C61 H61 1.0000 . ? 
C62 H62A 0.9800 . ? 
C62 H62B 0.9800 . ? 
C62 H62C 0.9800 . ? 
C63 H63A 0.9800 . ? 
C63 H63B 0.9800 . ? 
C63 H63C 0.9800 . ? 
C64 C65 1.531(5) . ? 
C64 C66 1.534(5) . ? 
C64 H64 1.0000 . ? 
C65 H65A 0.9800 . ? 
C65 H65B 0.9800 . ? 
C65 H65C 0.9800 . ? 
C66 H66A 0.9800 . ? 
C66 H66B 0.9800 . ? 
C66 H66C 0.9800 . ? 
C52A C57A 1.393(9) . ? 
C52A C53A 1.399(9) . ? 
C53A C54A 1.413(9) . ? 
C53A C58A 1.501(8) . ? 
C54A C55A 1.367(7) . ? 
C54A H54A 0.9500 . ? 
C55A C56A 1.369(7) . ? 
C55A C61A 1.543(7) . ? 
C56A C57A 1.405(10) . ? 
C56A H56A 0.9500 . ? 
C57A C64A 1.516(9) . ? 
C58A C59A 1.520(11) . ? 
C58A C60A 1.542(11) . ? 
C58A H58A 1.0000 . ? 
C59A H59D 0.9800 . ? 
C59A H59E 0.9800 . ? 
C59A H59F 0.9800 . ? 
C60A H60D 0.9800 . ? 
C60A H60E 0.9800 . ? 
C60A H60F 0.9800 . ? 
C61A C63A 1.480(9) . ? 
C61A C62A 1.545(13) . ? 
C61A H61A 1.0000 . ? 
C62A H62D 0.9800 . ? 
C62A H62E 0.9800 . ? 
C62A H62F 0.9800 . ? 
C63A H63D 0.9800 . ? 
C63A H63E 0.9800 . ? 
C63A H63F 0.9800 . ? 
C64A C65A 1.532(11) . ? 
C64A C66A 1.540(12) . ? 
C64A H64A 1.0000 . ? 
C65A H65D 0.9800 . ? 
C65A H65E 0.9800 . ? 
C65A H65F 0.9800 . ? 
C66A H66D 0.9800 . ? 
C66A H66E 0.9800 . ? 
C66A H66F 0.9800 . ? 
  
loop_ 
 _geom_angle_atom_site_label_1 
 _geom_angle_atom_site_label_2 
 _geom_angle_atom_site_label_3 
 _geom_angle 
 _geom_angle_site_symmetry_1 
 _geom_angle_site_symmetry_3 
 _geom_angle_publ_flag 
N1 Mo1 C1 102.61(6) . . ? 
N1 Mo1 O1 154.51(4) . . ? 
C1 Mo1 O1 102.70(5) . . ? 
N1 Mo1 Cl1 89.34(4) . . ? 
C1 Mo1 Cl1 108.62(4) . . ? 
O1 Mo1 Cl1 85.47(3) . . ? 
N1 Mo1 P1 93.27(4) . . ? 
C1 Mo1 P1 89.68(4) . . ? 
O1 Mo1 P1 83.88(3) . . ? 
Cl1 Mo1 P1 160.486(13) . . ? 
C2A C1 Mo1 146.1(6) . . ? 
C2 C1 Mo1 141.1(5) . . ? 
C2 C1 H1 115.1(11) . . ? 
Mo1 C1 H1 102.3(11) . . ? 
C2A C1 H1A 112.9(11) . . ? 
Mo1 C1 H1A 101.0(11) . . ? 
C2 C3 H3A 109.5 . . ? 
C2 C3 H3B 109.5 . . ? 
H3A C3 H3B 109.5 . . ? 
C2 C3 H3C 109.5 . . ? 
H3A C3 H3C 109.5 . . ? 
H3B C3 H3C 109.5 . . ? 
C2 C4 H4A 109.5 . . ? 
C2 C4 H4B 109.5 . . ? 
H4A C4 H4B 109.5 . . ? 
C2 C4 H4C 109.5 . . ? 
H4A C4 H4C 109.5 . . ? 
H4B C4 H4C 109.5 . . ? 
C2A C3A H3A1 109.5 . . ? 
C2A C3A H3A2 109.5 . . ? 
H3A1 C3A H3A2 109.5 . . ? 
C2A C3A H3A3 109.5 . . ? 
H3A1 C3A H3A3 109.5 . . ? 
H3A2 C3A H3A3 109.5 . . ? 
C2A C4A H4A1 109.5 . . ? 
C2A C4A H4A2 109.5 . . ? 
H4A1 C4A H4A2 109.5 . . ? 
C2A C4A H4A3 109.5 . . ? 
H4A1 C4A H4A3 109.5 . . ? 
H4A2 C4A H4A3 109.5 . . ? 
C1 C2 C4 112.6(10) . . ? 
C1 C2 C5 110.0(6) . . ? 
C4 C2 C5 110.0(13) . . ? 
C1 C2 C3 106.5(8) . . ? 
C4 C2 C3 109.3(10) . . ? 
C5 C2 C3 108.2(7) . . ? 
C6 C5 C10 116.0(7) . . ? 
C6 C5 C2 120.6(7) . . ? 
C10 C5 C2 123.3(7) . . ? 
C7 C6 C5 122.4(6) . . ? 
C7 C6 H6 118.8 . . ? 
C5 C6 H6 118.8 . . ? 
C8 C7 C6 120.4(6) . . ? 
C8 C7 H7 119.8 . . ? 
C6 C7 H7 119.8 . . ? 
C9 C8 C7 118.7(5) . . ? 
C9 C8 H8 120.7 . . ? 
C7 C8 H8 120.7 . . ? 
C8 C9 C10 120.7(5) . . ? 
C8 C9 H9 119.6 . . ? 
C10 C9 H9 119.6 . . ? 
C5 C10 C9 121.8(6) . . ? 
C5 C10 H10 119.1 . . ? 
C9 C10 H10 119.1 . . ? 
C1 C2A C5A 109.7(6) . . ? 
C1 C2A C4A 109.7(12) . . ? 
C5A C2A C4A 114.0(16) . . ? 
C1 C2A C3A 105.4(10) . . ? 
C5A C2A C3A 109.7(9) . . ? 
C4A C2A C3A 108.0(12) . . ? 
C6A C5A C10A 116.9(8) . . ? 
C6A C5A C2A 120.6(8) . . ? 
C10A C5A C2A 122.5(8) . . ? 
C7A C6A C5A 121.7(8) . . ? 
C7A C6A H6A 119.2 . . ? 
C5A C6A H6A 119.2 . . ? 
C8A C7A C6A 120.2(7) . . ? 
C8A C7A H7A 119.9 . . ? 
C6A C7A H7A 119.9 . . ? 
C9A C8A C7A 119.4(6) . . ? 
C9A C8A H8A 120.3 . . ? 
C7A C8A H8A 120.3 . . ? 
C8A C9A C10A 120.6(6) . . ? 
C8A C9A H9A 119.7 . . ? 
C10A C9A H9A 119.7 . . ? 
C9A C10A C5A 121.1(7) . . ? 
C9A C10A H10A 119.4 . . ? 
C5A C10A H10A 119.4 . . ? 
C22 P1 C23 105.67(7) . . ? 
C22 P1 C21 104.60(8) . . ? 
C23 P1 C21 105.34(6) . . ? 
C22 P1 Mo1 111.85(5) . . ? 
C23 P1 Mo1 115.03(5) . . ? 
C21 P1 Mo1 113.47(5) . . ? 
P1 C21 H21A 109.5 . . ? 
P1 C21 H21B 109.5 . . ? 
H21A C21 H21B 109.5 . . ? 
P1 C21 H21C 109.5 . . ? 
H21A C21 H21C 109.5 . . ? 
H21B C21 H21C 109.5 . . ? 
P1 C22 H22A 109.5 . . ? 
P1 C22 H22B 109.5 . . ? 
H22A C22 H22B 109.5 . . ? 
P1 C22 H22C 109.5 . . ? 
H22A C22 H22C 109.5 . . ? 
H22B C22 H22C 109.5 . . ? 
C28 C23 C24 118.81(13) . . ? 
C28 C23 P1 121.22(11) . . ? 
C24 C23 P1 119.91(10) . . ? 
C25 C24 C23 120.44(14) . . ? 
C25 C24 H24 119.8 . . ? 
C23 C24 H24 119.8 . . ? 
C26 C25 C24 120.08(14) . . ? 
C26 C25 H25 120.0 . . ? 
C24 C25 H25 120.0 . . ? 
C25 C26 C27 120.06(14) . . ? 
C25 C26 H26 120.0 . . ? 
C27 C26 H26 120.0 . . ? 
C26 C27 C28 120.21(15) . . ? 
C26 C27 H27 119.9 . . ? 
C28 C27 H27 119.9 . . ? 
C27 C28 C23 120.38(14) . . ? 
C27 C28 H28 119.8 . . ? 
C23 C28 H28 119.8 . . ? 
C11 N1 Mo1 160.67(10) . . ? 
N1 C11 C16 122.80(13) . . ? 
N1 C11 C12 120.59(12) . . ? 
C16 C11 C12 116.59(12) . . ? 
F1 C12 C13 118.61(13) . . ? 
F1 C12 C11 119.77(12) . . ? 
C13 C12 C11 121.62(13) . . ? 
F2 C13 C14 120.11(13) . . ? 
F2 C13 C12 119.89(14) . . ? 
C14 C13 C12 119.99(14) . . ? 
F3 C14 C15 120.10(14) . . ? 
F3 C14 C13 120.07(15) . . ? 
C15 C14 C13 119.81(13) . . ? 
F4 C15 C14 119.55(13) . . ? 
F4 C15 C16 120.11(15) . . ? 
C14 C15 C16 120.33(13) . . ? 
F5 C16 C15 119.02(13) . . ? 
F5 C16 C11 119.33(12) . . ? 
C15 C16 C11 121.65(14) . . ? 
C31 O1 Mo1 139.67(8) . . ? 
O1 C31 C36 119.40(10) . . ? 
O1 C31 C32 119.80(11) . . ? 
C36 C31 C32 120.73(11) . . ? 
C33 C32 C31 117.95(11) . . ? 
C33 C32 C37 117.39(10) . . ? 
C31 C32 C37 124.39(11) . . ? 
C38 C37 C42 119.31(11) . . ? 
C38 C37 C32 121.26(11) . . ? 
C42 C37 C32 118.94(11) . . ? 
C39 C38 C37 119.27(11) . . ? 
C39 C38 C43 118.12(11) . . ? 
C37 C38 C43 122.60(11) . . ? 
C40 C39 C38 122.31(12) . . ? 
C40 C39 H39 118.8 . . ? 
C38 C39 H39 118.8 . . ? 
C39 C40 C41 117.62(12) . . ? 
C39 C40 C46 121.84(12) . . ? 
C41 C40 C46 120.54(11) . . ? 
C40 C41 C42 122.51(11) . . ? 
C40 C41 H41 118.7 . . ? 
C42 C41 H41 118.7 . . ? 
C41 C42 C37 118.96(11) . . ? 
C41 C42 C49 119.65(11) . . ? 
C37 C42 C49 121.33(11) . . ? 
C38 C43 C45 111.67(11) . . ? 
C38 C43 C44 111.19(11) . . ? 
C45 C43 C44 109.54(11) . . ? 
C38 C43 H43 108.1 . . ? 
C45 C43 H43 108.1 . . ? 
C44 C43 H43 108.1 . . ? 
C43 C44 H44A 109.5 . . ? 
C43 C44 H44B 109.5 . . ? 
H44A C44 H44B 109.5 . . ? 
C43 C44 H44C 109.5 . . ? 
H44A C44 H44C 109.5 . . ? 
H44B C44 H44C 109.5 . . ? 
C43 C45 H45A 109.5 . . ? 
C43 C45 H45B 109.5 . . ? 
H45A C45 H45B 109.5 . . ? 
C43 C45 H45C 109.5 . . ? 
H45A C45 H45C 109.5 . . ? 
H45B C45 H45C 109.5 . . ? 
C40 C46 C47 112.52(11) . . ? 
C40 C46 C48 111.27(12) . . ? 
C47 C46 C48 110.51(12) . . ? 
C40 C46 H46 107.4 . . ? 
C47 C46 H46 107.4 . . ? 
C48 C46 H46 107.4 . . ? 
C46 C47 H47A 109.5 . . ? 
C46 C47 H47B 109.5 . . ? 
H47A C47 H47B 109.5 . . ? 
C46 C47 H47C 109.5 . . ? 
H47A C47 H47C 109.5 . . ? 
H47B C47 H47C 109.5 . . ? 
C46 C48 H48A 109.5 . . ? 
C46 C48 H48B 109.5 . . ? 
H48A C48 H48B 109.5 . . ? 
C46 C48 H48C 109.5 . . ? 
H48A C48 H48C 109.5 . . ? 
H48B C48 H48C 109.5 . . ? 
C42 C49 C50 113.58(11) . . ? 
C42 C49 C51 111.68(11) . . ? 
C50 C49 C51 109.52(11) . . ? 
C42 C49 H49 107.2 . . ? 
C50 C49 H49 107.2 . . ? 
C51 C49 H49 107.2 . . ? 
C49 C50 H50A 109.5 . . ? 
C49 C50 H50B 109.5 . . ? 
H50A C50 H50B 109.5 . . ? 
C49 C50 H50C 109.5 . . ? 
H50A C50 H50C 109.5 . . ? 
H50B C50 H50C 109.5 . . ? 
C49 C51 H51A 109.5 . . ? 
C49 C51 H51B 109.5 . . ? 
H51A C51 H51B 109.5 . . ? 
C49 C51 H51C 109.5 . . ? 
H51A C51 H51C 109.5 . . ? 
H51B C51 H51C 109.5 . . ? 
C34 C33 C32 122.14(12) . . ? 
C34 C33 H33 118.9 . . ? 
C32 C33 H33 118.9 . . ? 
C33 C34 C35 119.10(12) . . ? 
C33 C34 H34 120.5 . . ? 
C35 C34 H34 120.5 . . ? 
C34 C35 C36 121.09(13) . . ? 
C34 C35 H35 119.5 . . ? 
C36 C35 H35 119.5 . . ? 
C35 C36 C31 118.73(11) . . ? 
C35 C36 C52 118.1(2) . . ? 
C31 C36 C52 122.9(2) . . ? 
C35 C36 C52A 118.4(6) . . ? 
C31 C36 C52A 122.4(5) . . ? 
C57 C52 C53 119.8(2) . . ? 
C57 C52 C36 121.3(3) . . ? 
C53 C52 C36 118.8(3) . . ? 
C54 C53 C52 119.0(3) . . ? 
C54 C53 C58 119.9(3) . . ? 
C52 C53 C58 121.0(3) . . ? 
C55 C54 C53 121.9(3) . . ? 
C55 C54 H54 119.1 . . ? 
C53 C54 H54 119.1 . . ? 
C56 C55 C54 117.9(2) . . ? 
C56 C55 C61 120.7(2) . . ? 
C54 C55 C61 121.3(2) . . ? 
C55 C56 C57 122.5(2) . . ? 
C55 C56 H56 118.8 . . ? 
C57 C56 H56 118.8 . . ? 
C56 C57 C52 118.9(3) . . ? 
C56 C57 C64 119.9(3) . . ? 
C52 C57 C64 121.2(3) . . ? 
C53 C58 C60 112.5(3) . . ? 
C53 C58 C59 111.1(3) . . ? 
C60 C58 C59 110.7(4) . . ? 
C53 C58 H58 107.4 . . ? 
C60 C58 H58 107.4 . . ? 
C59 C58 H58 107.4 . . ? 
C58 C59 H59A 109.5 . . ? 
C58 C59 H59B 109.5 . . ? 
H59A C59 H59B 109.5 . . ? 
C58 C59 H59C 109.5 . . ? 
H59A C59 H59C 109.5 . . ? 
H59B C59 H59C 109.5 . . ? 
C58 C60 H60A 109.5 . . ? 
C58 C60 H60B 109.5 . . ? 
H60A C60 H60B 109.5 . . ? 
C58 C60 H60C 109.5 . . ? 
H60A C60 H60C 109.5 . . ? 
H60B C60 H60C 109.5 . . ? 
C63 C61 C55 112.9(2) . . ? 
C63 C61 C62 108.4(5) . . ? 
C55 C61 C62 111.1(4) . . ? 
C63 C61 H61 108.1 . . ? 
C55 C61 H61 108.1 . . ? 
C62 C61 H61 108.1 . . ? 
C61 C62 H62A 109.5 . . ? 
C61 C62 H62B 109.5 . . ? 
H62A C62 H62B 109.5 . . ? 
C61 C62 H62C 109.5 . . ? 
H62A C62 H62C 109.5 . . ? 
H62B C62 H62C 109.5 . . ? 
C61 C63 H63A 109.5 . . ? 
C61 C63 H63B 109.5 . . ? 
H63A C63 H63B 109.5 . . ? 
C61 C63 H63C 109.5 . . ? 
H63A C63 H63C 109.5 . . ? 
H63B C63 H63C 109.5 . . ? 
C57 C64 C65 113.4(3) . . ? 
C57 C64 C66 110.9(4) . . ? 
C65 C64 C66 108.6(4) . . ? 
C57 C64 H64 107.9 . . ? 
C65 C64 H64 107.9 . . ? 
C66 C64 H64 107.9 . . ? 
C64 C65 H65A 109.5 . . ? 
C64 C65 H65B 109.5 . . ? 
H65A C65 H65B 109.5 . . ? 
C64 C65 H65C 109.5 . . ? 
H65A C65 H65C 109.5 . . ? 
H65B C65 H65C 109.5 . . ? 
C64 C66 H66A 109.5 . . ? 
C64 C66 H66B 109.5 . . ? 
H66A C66 H66B 109.5 . . ? 
C64 C66 H66C 109.5 . . ? 
H66A C66 H66C 109.5 . . ? 
H66B C66 H66C 109.5 . . ? 
C57A C52A C53A 121.1(6) . . ? 
C57A C52A C36 114.1(7) . . ? 
C53A C52A C36 124.1(7) . . ? 
C52A C53A C54A 117.2(6) . . ? 
C52A C53A C58A 122.7(7) . . ? 
C54A C53A C58A 120.0(7) . . ? 
C55A C54A C53A 122.2(6) . . ? 
C55A C54A H54A 118.9 . . ? 
C53A C54A H54A 118.9 . . ? 
C54A C55A C56A 119.5(6) . . ? 
C54A C55A C61A 119.9(6) . . ? 
C56A C55A C61A 120.5(6) . . ? 
C55A C56A C57A 121.0(6) . . ? 
C55A C56A H56A 119.5 . . ? 
C57A C56A H56A 119.5 . . ? 
C52A C57A C56A 118.8(6) . . ? 
C52A C57A C64A 121.4(8) . . ? 
C56A C57A C64A 119.7(7) . . ? 
C53A C58A C59A 110.7(9) . . ? 
C53A C58A C60A 112.6(7) . . ? 
C59A C58A C60A 110.0(10) . . ? 
C53A C58A H58A 107.8 . . ? 
C59A C58A H58A 107.8 . . ? 
C60A C58A H58A 107.8 . . ? 
C58A C59A H59D 109.5 . . ? 
C58A C59A H59E 109.5 . . ? 
H59D C59A H59E 109.5 . . ? 
C58A C59A H59F 109.5 . . ? 
H59D C59A H59F 109.5 . . ? 
H59E C59A H59F 109.5 . . ? 
C58A C60A H60D 109.5 . . ? 
C58A C60A H60E 109.5 . . ? 
H60D C60A H60E 109.5 . . ? 
C58A C60A H60F 109.5 . . ? 
H60D C60A H60F 109.5 . . ? 
H60E C60A H60F 109.5 . . ? 
C63A C61A C55A 111.5(6) . . ? 
C63A C61A C62A 113.3(13) . . ? 
C55A C61A C62A 108.5(10) . . ? 
C63A C61A H61A 107.7 . . ? 
C55A C61A H61A 107.7 . . ? 
C62A C61A H61A 107.7 . . ? 
C61A C62A H62D 109.5 . . ? 
C61A C62A H62E 109.5 . . ? 
H62D C62A H62E 109.5 . . ? 
C61A C62A H62F 109.5 . . ? 
H62D C62A H62F 109.5 . . ? 
H62E C62A H62F 109.5 . . ? 
C61A C63A H63D 109.5 . . ? 
C61A C63A H63E 109.5 . . ? 
H63D C63A H63E 109.5 . . ? 
C61A C63A H63F 109.5 . . ? 
H63D C63A H63F 109.5 . . ? 
H63E C63A H63F 109.5 . . ? 
C57A C64A C65A 115.1(7) . . ? 
C57A C64A C66A 113.0(10) . . ? 
C65A C64A C66A 110.3(10) . . ? 
C57A C64A H64A 105.9 . . ? 
C65A C64A H64A 105.9 . . ? 
C66A C64A H64A 105.9 . . ? 
C64A C65A H65D 109.5 . . ? 
C64A C65A H65E 109.5 . . ? 
H65D C65A H65E 109.5 . . ? 
C64A C65A H65F 109.5 . . ? 
H65D C65A H65F 109.5 . . ? 
H65E C65A H65F 109.5 . . ? 
C64A C66A H66D 109.5 . . ? 
C64A C66A H66E 109.5 . . ? 
H66D C66A H66E 109.5 . . ? 
C64A C66A H66F 109.5 . . ? 
H66D C66A H66F 109.5 . . ? 
H66E C66A H66F 109.5 . . ? 
  
_refine_diff_density_max    0.416 
_refine_diff_density_min   -0.445 
_refine_diff_density_rms    0.050 
  
_shelxl_version_number 2014/6 
  
_shelx_res_file 
; 
TITL X16179 in P2(1)/n 
CELL 0.71073  12.95580  27.59100  20.47110  90.0000  94.7881  90.0000 
ZERR    4.00   0.00110   0.00230   0.00160   0.0000   0.0016   0.0000 
LATT  1 
SYMM 0.5-X, 0.5+Y, 0.5-Z 
SFAC C H N O F P CL MO 
UNIT 240 288 4 4 20 4 4 4 
TEMP -173 
SIZE 0.08 0.375 0.48 
  
OMIT     1  13   0    ! outlier, Fo > Fc 
  
acta 
  
L.S. 15 0  182 
BOND $H 
FMAP 2 
PLAN 20 
  
dfix 0.95 c1 h1 
sadi 0.01 mo1 h1 mo1 h1a 
sadi 0.01 c2 h1 c2a h1a 
flat 0.01 c1 c2a mo1 h1a 
  
simu c1 > c10a 
rigu c1 > c10a 
simu c36 > c66a 
rigu c36 > c66a 
  
sadi c1 c2 c1 c2a 
sadi c2 c3 c2 c4 c2a c3a c2a c4a 
sadi c2 c5 c2a c5a 
sadi 0.04 c1 c3 c1 c4 c1 c3a c1 c4a 
sadi 0.04 c3 c4 c3a c4a 
sadi 0.04 c1 c5 c1 c5a 
sadi 0.04 c2 c6 c2a c6a c2 c10 c2a c10a 
flat 0.02 c2 c5 c6 c7 c8 c9 c10 
flat 0.02 c2a c5a c6a c7a c8a c9a c10a 
eadp c2 c2a   ! nearly overlapping 
eadp c3 c3a   ! nearly overlapping 
eadp c4 c4a   ! nearly overlapping 
  
ABIN 
WGHT    0.032500    2.979800 
FVAR       0.07785   0.54368   0.71467 
CL1   7    0.609316    0.779203    0.594639    11.00000    0.02716    0.02354 = 
         0.01998   -0.00033    0.00494   -0.00272 
MO1   8    0.540338    0.726121    0.673316    11.00000    0.02088    0.01872 = 
         0.01125   -0.00202    0.00079    0.00284 
REM  ---------------------------------------------------- 
C1    1    0.634623    0.674835    0.691617    11.00000    0.02680    0.02424 = 
         0.01642   -0.00192    0.00063    0.00402 
part 1 
H1    2    0.624605    0.655672    0.653403    21.00000   -1.20000 
REM  Q4    1   0.6215  0.6526  0.6582  11.00000  0.05    0.90 
part 2 
H1A   2    0.612044    0.651981    0.656987   -21.00000   -1.20000 
part 1 
C3    1    0.824468    0.669970    0.699604    21.00000    0.02984    0.03983 = 
         0.02621    0.00254    0.00147    0.00676 
AFIX  33 
H3A   2    0.886955    0.661615    0.727642    21.00000   -1.50000 
H3B   2    0.820304    0.649643    0.660214    21.00000   -1.50000 
H3C   2    0.827397    0.704158    0.686910    21.00000   -1.50000 
AFIX   0 
C4    1    0.736179    0.691630    0.799969    21.00000    0.03015    0.03479 = 
         0.02100   -0.00468   -0.00599    0.00768 
AFIX  33 
H4A   2    0.797348    0.681500    0.828042    21.00000   -1.50000 
H4B   2    0.742721    0.725926    0.788562    21.00000   -1.50000 
H4C   2    0.673990    0.687009    0.823418    21.00000   -1.50000 
AFIX   0 
part 2 
C3A   1    0.820573    0.660873    0.695223   -21.00000    0.02984    0.03983 = 
         0.02621    0.00254    0.00147    0.00676 
AFIX  33 
H3A1  2    0.882568    0.649375    0.721364   -21.00000   -1.50000 
H3A2  2    0.809355    0.641232    0.655376   -21.00000   -1.50000 
H3A3  2    0.829997    0.694873    0.683208   -21.00000   -1.50000 
AFIX   0 
C4A   1    0.743457    0.689627    0.796196   -21.00000    0.03015    0.03479 = 
         0.02100   -0.00468   -0.00599    0.00768 
AFIX  33 
H4A1  2    0.802348    0.677536    0.824738   -21.00000   -1.50000 
H4A2  2    0.758198    0.722613    0.781849   -21.00000   -1.50000 
H4A3  2    0.681282    0.689894    0.820372   -21.00000   -1.50000 
AFIX   0 
part 1 
same 0.01 c2 c5 c10 < c6 
same 0.01 c2 c5 c6a > c10a 
C2    1    0.727597    0.661261    0.737636    21.00000    0.02644    0.02606 = 
         0.01867   -0.00144   -0.00084    0.00720 
C5    1    0.723398    0.607529    0.754878    21.00000    0.02992    0.02890 = 
         0.01962   -0.00295    0.00434    0.00647 
C6    1    0.696113    0.573191    0.706739    21.00000    0.05950    0.02583 = 
         0.02541    0.00299   -0.00330    0.01455 
AFIX  43 
H6    2    0.679207    0.583822    0.663013    21.00000   -1.20000 
AFIX   0 
C7    1    0.692708    0.523974    0.720305    21.00000    0.08513    0.02654 = 
         0.03959   -0.00963   -0.00542    0.01136 
AFIX  43 
H7    2    0.674573    0.501621    0.685953    21.00000   -1.20000 
AFIX   0 
C8    1    0.715466    0.507351    0.783277    21.00000    0.06719    0.02754 = 
         0.04444    0.00679    0.00183    0.00544 
AFIX  43 
H8    2    0.712536    0.473718    0.792886    21.00000   -1.20000 
AFIX   0 
C9    1    0.742503    0.540394    0.831946    21.00000    0.05273    0.03606 = 
         0.02857    0.00904    0.00187    0.00297 
AFIX  43 
H9    2    0.758937    0.529449    0.875576    21.00000   -1.20000 
AFIX   0 
C10   1    0.746086    0.589715    0.818044    21.00000    0.03836    0.02982 = 
         0.02390    0.00371   -0.00193    0.00246 
AFIX  43 
H10   2    0.764529    0.611830    0.852633    21.00000   -1.20000 
AFIX   0 
part 2 
C2A   1    0.725444    0.656355    0.735868   -21.00000    0.02644    0.02606 = 
         0.01867   -0.00144   -0.00084    0.00720 
C5A   1    0.707984    0.602722    0.752776   -21.00000    0.02668    0.02194 = 
         0.02070    0.00179   -0.00096    0.00890 
C6A   1    0.684387    0.568802    0.703296   -21.00000    0.03585    0.03063 = 
         0.01980   -0.00896    0.00128    0.00748 
AFIX  43 
H6A   2    0.678803    0.579187    0.658896   -21.00000   -1.20000 
AFIX   0 
C7A   1    0.668897    0.520414    0.717202   -21.00000    0.04887    0.02970 = 
         0.03404   -0.00006   -0.00382    0.00421 
AFIX  43 
H7A   2    0.652506    0.498116    0.682520   -21.00000   -1.20000 
AFIX   0 
C8A   1    0.677144    0.504501    0.781025   -21.00000    0.07085    0.03345 = 
         0.04616    0.00638   -0.00053    0.00502 
AFIX  43 
H8A   2    0.667422    0.471202    0.790603   -21.00000   -1.20000 
AFIX   0 
C9A   1    0.699533    0.537096    0.830800   -21.00000    0.07486    0.04445 = 
         0.03501    0.01375   -0.00173    0.00650 
AFIX  43 
H9A   2    0.704751    0.526279    0.875009   -21.00000   -1.20000 
AFIX   0 
C10A  1    0.714620    0.585706    0.817164   -21.00000    0.05808    0.04115 = 
         0.02271   -0.00223    0.00051    0.00678 
AFIX  43 
H10A  2    0.729730    0.607788    0.852270   -21.00000   -1.20000 
AFIX   0 
part 0 
REM  ---------------------------------------------------- 
  
P1    6    0.412769    0.684660    0.740430    11.00000    0.02624    0.02684 = 
         0.01284    0.00088    0.00261    0.00191 
C21   1    0.295387    0.719361    0.747573    11.00000    0.02871    0.04704 = 
         0.02061    0.00297    0.00295    0.00951 
AFIX 137 
H21A  2    0.247807    0.700710    0.772616    11.00000   -1.50000 
H21B  2    0.262277    0.726170    0.703735    11.00000   -1.50000 
H21C  2    0.312637    0.749958    0.770228    11.00000   -1.50000 
AFIX   0 
C22   1    0.368676    0.627945    0.704405    11.00000    0.04082    0.03532 = 
         0.02037   -0.00062    0.00364   -0.00859 
AFIX 137 
H22A  2    0.427547    0.605781    0.702945    11.00000   -1.50000 
H22B  2    0.337504    0.633666    0.659795    11.00000   -1.50000 
H22C  2    0.317002    0.613551    0.730886    11.00000   -1.50000 
AFIX   0 
C23   1    0.461049    0.670427    0.823812    11.00000    0.02543    0.03075 = 
         0.01446    0.00258    0.00378    0.00287 
C24   1    0.478153    0.707519    0.869696    11.00000    0.03370    0.03150 = 
         0.01732    0.00025    0.00360    0.00552 
AFIX  43 
H24   2    0.462624    0.740072    0.857361    11.00000   -1.20000 
AFIX   0 
C25   1    0.517805    0.697174    0.933412    11.00000    0.03228    0.04638 = 
         0.01545   -0.00371    0.00328    0.00093 
AFIX  43 
H25   2    0.529199    0.722635    0.964417    11.00000   -1.20000 
AFIX   0 
C26   1    0.540564    0.650069    0.951606    11.00000    0.03767    0.05275 = 
         0.01578    0.00707    0.00025    0.00525 
AFIX  43 
H26   2    0.566874    0.643026    0.995282    11.00000   -1.20000 
AFIX   0 
C27   1    0.525193    0.613090    0.906456    11.00000    0.05733    0.03808 = 
         0.02510    0.00958    0.00033    0.01021 
AFIX  43 
H27   2    0.541486    0.580660    0.919041    11.00000   -1.20000 
AFIX   0 
C28   1    0.485952    0.623137    0.842631    11.00000    0.04701    0.03059 = 
         0.02086    0.00298    0.00244    0.00365 
AFIX  43 
H28   2    0.476083    0.597555    0.811679    11.00000   -1.20000 
AFIX   0 
REM  ---------------------------------------------------- 
N1    3    0.577317    0.768144    0.735401    11.00000    0.02446    0.02433 = 
         0.01435   -0.00302    0.00163    0.00256 
C11   1    0.601655    0.811204    0.766134    11.00000    0.02742    0.02246 = 
         0.01392   -0.00197    0.00070    0.00203 
C12   1    0.702179    0.830256    0.767002    11.00000    0.02879    0.02560 = 
         0.01876   -0.00243    0.00052    0.00279 
F1    5    0.774831    0.806057    0.738289    11.00000    0.02658    0.03397 = 
         0.03074   -0.00639    0.00529    0.00085 
C13   1    0.727967    0.873985    0.796562    11.00000    0.03380    0.02640 = 
         0.02679   -0.00019   -0.00379   -0.00334 
F2    5    0.824817    0.891088    0.796227    11.00000    0.03934    0.03207 = 
         0.04825   -0.00225   -0.00381   -0.01006 
C14   1    0.654326    0.900038    0.826354    11.00000    0.04898    0.02127 = 
         0.02536   -0.00730   -0.00558    0.00217 
F3    5    0.679778    0.941918    0.856313    11.00000    0.06725    0.02632 = 
         0.04795   -0.01569   -0.00880    0.00040 
C15   1    0.555360    0.882356    0.826449    11.00000    0.04338    0.02865 = 
         0.02342   -0.00864    0.00251    0.01153 
F4    5    0.484689    0.907307    0.856768    11.00000    0.05553    0.04105 = 
         0.04282   -0.02037    0.00807    0.01620 
C16   1    0.529150    0.838884    0.796499    11.00000    0.03047    0.02805 = 
         0.01925   -0.00322    0.00225    0.00468 
F5    5    0.431726    0.822690    0.796936    11.00000    0.03032    0.03703 = 
         0.03313   -0.00640    0.01029    0.00410 
REM  ---------------------------------------------------- 
O1    4    0.450844    0.700983    0.598494    11.00000    0.02108    0.01946 = 
         0.01146   -0.00075    0.00191    0.00133 
C31   1    0.431108    0.708638    0.533278    11.00000    0.02072    0.01922 = 
         0.01160   -0.00145    0.00185   -0.00175 
C32   1    0.495254    0.687352    0.488930    11.00000    0.01829    0.01910 = 
         0.01415   -0.00182    0.00216   -0.00137 
REM  -------------- 
C37   1    0.577987    0.650524    0.507553    11.00000    0.01941    0.01918 = 
         0.01285   -0.00355    0.00258   -0.00019 
C38   1    0.682708    0.659658    0.498127    11.00000    0.02124    0.01970 = 
         0.01377   -0.00142    0.00433   -0.00164 
C39   1    0.754683    0.622128    0.507345    11.00000    0.01874    0.02401 = 
         0.02062   -0.00097    0.00629   -0.00128 
AFIX  43 
H39   2    0.825127    0.628502    0.500770    11.00000   -1.20000 
AFIX   0 
C40   1    0.726956    0.575822    0.525781    11.00000    0.02097    0.01969 = 
         0.01923   -0.00274    0.00416    0.00127 
C41   1    0.623375    0.567611    0.535626    11.00000    0.02257    0.01751 = 
         0.01882   -0.00300    0.00472   -0.00188 
AFIX  43 
H41   2    0.603158    0.536206    0.548676    11.00000   -1.20000 
AFIX   0 
C42   1    0.548272    0.603669    0.527076    11.00000    0.01811    0.01991 = 
         0.01626   -0.00425    0.00282   -0.00175 
C43   1    0.720855    0.708816    0.476872    11.00000    0.02305    0.02003 = 
         0.02009    0.00190    0.00718   -0.00083 
AFIX  13 
H43   2    0.662797    0.732544    0.478583    11.00000   -1.20000 
AFIX   0 
C44   1    0.752096    0.707190    0.406318    11.00000    0.03630    0.03623 = 
         0.02397    0.00400    0.01239   -0.00341 
AFIX 137 
H44A  2    0.810755    0.685026    0.403870    11.00000   -1.50000 
H44B  2    0.772088    0.739737    0.392935    11.00000   -1.50000 
H44C  2    0.693419    0.695767    0.377040    11.00000   -1.50000 
AFIX   0 
C45   1    0.812317    0.726924    0.522661    11.00000    0.02304    0.02320 = 
         0.03216    0.00017    0.00486   -0.00458 
AFIX 137 
H45A  2    0.791977    0.728344    0.567668    11.00000   -1.50000 
H45B  2    0.832543    0.759339    0.508888    11.00000   -1.50000 
H45C  2    0.870938    0.704671    0.520718    11.00000   -1.50000 
AFIX   0 
C46   1    0.805521    0.535025    0.534278    11.00000    0.02152    0.01955 = 
         0.03300    0.00008    0.00675    0.00134 
AFIX  13 
H46   2    0.768483    0.505762    0.549207    11.00000   -1.20000 
AFIX   0 
C47   1    0.893383    0.546287    0.586436    11.00000    0.02729    0.03331 = 
         0.04364    0.00015   -0.00158    0.00619 
AFIX 137 
H47A  2    0.932027    0.574592    0.572908    11.00000   -1.50000 
H47B  2    0.940007    0.518335    0.591682    11.00000   -1.50000 
H47C  2    0.864529    0.553166    0.628209    11.00000   -1.50000 
AFIX   0 
C48   1    0.848741    0.522207    0.469258    11.00000    0.03320    0.03285 = 
         0.04229   -0.00750    0.01193    0.00763 
AFIX 137 
H48A  2    0.791366    0.515931    0.436046    11.00000   -1.50000 
H48B  2    0.892170    0.493188    0.474987    11.00000   -1.50000 
H48C  2    0.890406    0.549282    0.455038    11.00000   -1.50000 
AFIX   0 
C49   1    0.435589    0.591500    0.535694    11.00000    0.01984    0.01975 = 
         0.02810   -0.00444    0.00563   -0.00266 
AFIX  13 
H49   2    0.405142    0.619936    0.557509    11.00000   -1.20000 
AFIX   0 
C50   1    0.422197    0.547306    0.579312    11.00000    0.02537    0.02191 = 
         0.03640   -0.00288    0.01136   -0.00466 
AFIX 137 
H50A  2    0.438575    0.517801    0.555609    11.00000   -1.50000 
H50B  2    0.350434    0.545750    0.590980    11.00000   -1.50000 
H50C  2    0.469001    0.550056    0.619291    11.00000   -1.50000 
AFIX   0 
C51   1    0.372868    0.584278    0.469602    11.00000    0.02569    0.02868 = 
         0.03746   -0.00612   -0.00230   -0.00604 
AFIX 137 
H51A  2    0.374843    0.614071    0.443673    11.00000   -1.50000 
H51B  2    0.300915    0.576584    0.476979    11.00000   -1.50000 
H51C  2    0.402726    0.557559    0.445875    11.00000   -1.50000 
AFIX   0 
REM  -------------- 
C33   1    0.474602    0.697668    0.422348    11.00000    0.02466    0.02747 = 
         0.01430   -0.00187    0.00444    0.00236 
AFIX  43 
H33   2    0.518457    0.684384    0.391984    11.00000   -1.20000 
AFIX   0 
C34   1    0.392629    0.726509    0.399234    11.00000    0.02812    0.03574 = 
         0.01216    0.00029    0.00093    0.00480 
AFIX  43 
H34   2    0.381523    0.733764    0.353826    11.00000   -1.20000 
AFIX   0 
C35   1    0.326408    0.744838    0.443309    11.00000    0.02494    0.03532 = 
         0.01497    0.00044    0.00009    0.00845 
AFIX  43 
H35   2    0.268396    0.763778    0.427463    11.00000   -1.20000 
AFIX   0 
sadi 0.01 c36 c52 c36 c52a 
sadi 0.02 c31 c52 c31 c52a c31 c37 c35 c52 c35 c52a c33 c37 
same c32 > c51 
same c36 c52a > c66a 
sadi c55 c61 c55a c61a 
C36   1    0.343807    0.735851    0.510518    11.00000    0.02128    0.02687 = 
         0.01476   -0.00255    0.00235    0.00261 
REM  -------------- 
part 1 
C52   1    0.262064    0.751523    0.554229    31.00000    0.01829    0.02565 = 
         0.01222   -0.00368   -0.00097    0.00157 
C53   1    0.265162    0.799108    0.579066    31.00000    0.01534    0.02717 = 
         0.01901    0.00002    0.00063   -0.00200 
C54   1    0.184606    0.815116    0.615181    31.00000    0.02223    0.02553 = 
         0.01886   -0.00535    0.00168    0.00053 
AFIX  43 
H54   2    0.186869    0.847169    0.632188    31.00000   -1.20000 
AFIX   0 
C55   1    0.101581    0.785517    0.626842    31.00000    0.01731    0.03347 = 
         0.01438    0.00011    0.00281   -0.00085 
C56   1    0.101317    0.738589    0.602880    31.00000    0.01566    0.03098 = 
         0.01654   -0.00002    0.00014   -0.00289 
AFIX  43 
H56   2    0.045088    0.717889    0.610760    31.00000   -1.20000 
AFIX   0 
C57   1    0.180490    0.720573    0.567616    31.00000    0.01634    0.02718 = 
         0.01491   -0.00038    0.00045   -0.00065 
C58   1    0.351868    0.833512    0.565165    31.00000    0.02066    0.02642 = 
         0.02789   -0.00282    0.00530   -0.00074 
AFIX  13 
H58   2    0.409328    0.813592    0.549432    31.00000   -1.20000 
AFIX   0 
C59   1    0.316837    0.869086    0.510370    31.00000    0.03568    0.04207 = 
         0.05669    0.01613    0.00934   -0.00490 
AFIX  33 
H59A  2    0.374181    0.890869    0.502361    31.00000   -1.50000 
H59B  2    0.295777    0.851032    0.470229    31.00000   -1.50000 
H59C  2    0.258122    0.888134    0.523437    31.00000   -1.50000 
AFIX   0 
C60   1    0.395524    0.860695    0.626500    31.00000    0.02907    0.04264 = 
         0.04547   -0.02082    0.00547   -0.00605 
AFIX  33 
H60A  2    0.451140    0.882407    0.615118    31.00000   -1.50000 
H60B  2    0.340316    0.879737    0.644096    31.00000   -1.50000 
H60C  2    0.423080    0.837353    0.659578    31.00000   -1.50000 
AFIX   0 
C61   1    0.014857    0.803292    0.666530    31.00000    0.02312    0.03876 = 
         0.02130   -0.00113    0.00768    0.00406 
AFIX  13 
H61   2   -0.043581    0.779595    0.660638    31.00000   -1.20000 
AFIX   0 
C62   1    0.050340    0.805730    0.739367    31.00000    0.04427    0.06851 = 
         0.02219   -0.00503    0.01207    0.01056 
AFIX  33 
H62A  2    0.077058    0.774009    0.754193    31.00000   -1.50000 
H62B  2    0.105133    0.830100    0.746592    31.00000   -1.50000 
H62C  2   -0.008364    0.814648    0.764133    31.00000   -1.50000 
AFIX   0 
C63   1   -0.026053    0.852730    0.644862    31.00000    0.06442    0.07284 = 
         0.06099    0.02954    0.04391    0.04471 
AFIX  33 
H63A  2   -0.081499    0.862362    0.671940    31.00000   -1.50000 
H63B  2    0.030213    0.876524    0.649855    31.00000   -1.50000 
H63C  2   -0.053314    0.851257    0.598788    31.00000   -1.50000 
AFIX   0 
C64   1    0.175034    0.668809    0.542078    31.00000    0.02279    0.02408 = 
         0.03261   -0.00680    0.00056   -0.00230 
AFIX  13 
H64   2    0.247261    0.657881    0.536180    31.00000   -1.20000 
AFIX   0 
C65   1    0.127918    0.633218    0.588699    31.00000    0.04186    0.03599 = 
         0.04674    0.00269   -0.00156   -0.01610 
AFIX  33 
H65A  2    0.126571    0.600650    0.569544    31.00000   -1.50000 
H65B  2    0.169892    0.632885    0.630801    31.00000   -1.50000 
H65C  2    0.057139    0.643343    0.595587    31.00000   -1.50000 
AFIX   0 
C66   1    0.112559    0.666262    0.475129    31.00000    0.03309    0.04204 = 
         0.02931   -0.01194   -0.00159   -0.00646 
AFIX  33 
H66A  2    0.110048    0.632643    0.459633    31.00000   -1.50000 
H66B  2    0.041975    0.677932    0.479322    31.00000   -1.50000 
H66C  2    0.145741    0.686585    0.443662    31.00000   -1.50000 
AFIX   0 
part 2 
C52A  1    0.275419    0.760728    0.556267   -31.00000    0.01020    0.02569 = 
         0.01364   -0.00314   -0.00455    0.00082 
C53A  1    0.286336    0.809209    0.575633   -31.00000    0.01464    0.02115 = 
         0.01011   -0.00297    0.00095    0.00548 
C54A  1    0.209037    0.828725    0.612715   -31.00000    0.01913    0.02326 = 
         0.01701   -0.00250    0.00040    0.00196 
AFIX  43 
H54A  2    0.215815    0.861239    0.627733   -31.00000   -1.20000 
AFIX   0 
C55A  1    0.124821    0.802391    0.627709   -31.00000    0.01755    0.02695 = 
         0.01524   -0.00604    0.00065   -0.00262 
C56A  1    0.115075    0.755204    0.607510   -31.00000    0.01912    0.02809 = 
         0.01717   -0.00270    0.00133   -0.00670 
AFIX  43 
H56A  2    0.057075    0.736769    0.618526   -31.00000   -1.20000 
AFIX   0 
C57A  1    0.189578    0.733610    0.570717   -31.00000    0.02354    0.02149 = 
         0.01799   -0.00214   -0.00463    0.00154 
C58A  1    0.373243    0.840729    0.556465   -31.00000    0.02145    0.02322 = 
         0.03362    0.00038    0.00798   -0.00301 
AFIX  13 
H58A  2    0.427363    0.819126    0.540001   -31.00000   -1.20000 
AFIX   0 
C59A  1    0.335826    0.874735    0.501038   -31.00000    0.03567    0.03850 = 
         0.04774    0.01821   -0.00118   -0.00016 
AFIX  33 
H59D  2    0.393578    0.894981    0.489238   -31.00000   -1.50000 
H59E  2    0.309273    0.855696    0.462855   -31.00000   -1.50000 
H59F  2    0.280507    0.895451    0.515291   -31.00000   -1.50000 
AFIX   0 
C60A  1    0.424287    0.870017    0.614673   -31.00000    0.03663    0.02570 = 
         0.05249   -0.00565    0.00321   -0.00135 
AFIX  33 
H60D  2    0.480330    0.889938    0.599701   -31.00000   -1.50000 
H60E  2    0.372415    0.891019    0.632434   -31.00000   -1.50000 
H60F  2    0.452551    0.847704    0.648871   -31.00000   -1.50000 
AFIX   0 
C61A  1    0.042481    0.825733    0.668003   -31.00000    0.02831    0.05392 = 
         0.02399   -0.00973    0.00570    0.00876 
AFIX  13 
H61A  2    0.064698    0.859798    0.678230   -31.00000   -1.20000 
AFIX   0 
C62A  1    0.041120    0.798177    0.733618   -31.00000    0.02896    0.10779 = 
         0.01918   -0.00346    0.01109    0.02297 
AFIX  33 
H62D  2    0.110885    0.798120    0.756167   -31.00000   -1.50000 
H62E  2   -0.006849    0.814213    0.761241   -31.00000   -1.50000 
H62F  2    0.018460    0.764720    0.725071   -31.00000   -1.50000 
AFIX   0 
C63A  1   -0.060024    0.827711    0.630334   -31.00000    0.03716    0.08949 = 
         0.02813   -0.00478    0.00770    0.02142 
AFIX  33 
H63D  2   -0.110398    0.842690    0.657250   -31.00000   -1.50000 
H63E  2   -0.054908    0.846979    0.590517   -31.00000   -1.50000 
H63F  2   -0.082640    0.794775    0.618290   -31.00000   -1.50000 
AFIX   0 
C64A  1    0.176870    0.681177    0.549438   -31.00000    0.01520    0.02766 = 
         0.02644   -0.00215    0.00138   -0.00083 
AFIX  13 
H64A  2    0.248632    0.668049    0.548248   -31.00000   -1.20000 
AFIX   0 
C65A  1    0.123217    0.648466    0.596719   -31.00000    0.02775    0.03374 = 
         0.04973    0.00027   -0.00223   -0.01485 
AFIX  33 
H65D  2    0.118405    0.615446    0.579092   -31.00000   -1.50000 
H65E  2    0.163442    0.648161    0.639440   -31.00000   -1.50000 
H65F  2    0.053480    0.660867    0.601872   -31.00000   -1.50000 
AFIX   0 
C66A  1    0.125272    0.675683    0.479313   -31.00000    0.02171    0.04331 = 
         0.04708   -0.01856   -0.00138   -0.00907 
AFIX  33 
H66D  2    0.119034    0.641204    0.468182   -31.00000   -1.50000 
H66E  2    0.056243    0.690437    0.476694   -31.00000   -1.50000 
H66F  2    0.167697    0.691912    0.448426   -31.00000   -1.50000 
PART   0 
  
AFIX   0 
HKLF 4 
  
REM  X16179 in P2(1)/n 
REM R1 =  0.0317 for   18056 Fo > 4sig(Fo)  and  0.0437 for all   22270 data 
REM    845 parameters refined using   1318 restraints 
  
END 
  
WGHT      0.0325      2.9798 
  
REM Highest difference peak  0.416,  deepest hole -0.445,  1-sigma level  0.050 
Q1    1   0.4597  0.6964  0.5090  11.00000  0.05    0.42 
Q2    1   0.6988  0.6840  0.4897  11.00000  0.05    0.40 
Q3    1   0.6869  0.8846  0.8143  11.00000  0.05    0.40 
Q4    1   0.5351  0.6698  0.5013  11.00000  0.05    0.38 
Q5    1   0.3863  0.7236  0.5208  11.00000  0.05    0.38 
Q6    1   0.5786  0.6911  0.7036  11.00000  0.05    0.37 
Q7    1   0.6437  0.8227  0.7621  11.00000  0.05    0.35 
Q8    1   0.4854  0.6490  0.8341  11.00000  0.05    0.35 
Q9    1   0.3479  0.7289  0.4173  11.00000  0.05    0.34 
Q10   1   0.3416  0.7388  0.4764  11.00000  0.05    0.34 
Q11   1   0.7627  0.7156  0.4970  11.00000  0.05    0.32 
Q12   1   0.7388  0.5986  0.5154  11.00000  0.05    0.32 
Q13   1   0.4363  0.6832  0.7846  11.00000  0.05    0.32 
Q14   1   0.3463  0.7034  0.7349  11.00000  0.05    0.32 
Q15   1   0.6748  0.5738  0.5325  11.00000  0.05    0.32 
Q16   1   0.6287  0.6528  0.5021  11.00000  0.05    0.32 
Q17   1   0.6192  0.7029  0.6767  11.00000  0.05    0.31 
Q18   1   0.5912  0.5897  0.5367  11.00000  0.05    0.31 
Q19   1   0.7167  0.6407  0.5158  11.00000  0.05    0.31 
Q20   1   0.1369  0.7265  0.5839  11.00000  0.05    0.30 
; 
_shelx_res_checksum   47222 
  
_shelx_hkl_file 
; 
  -1   0   0   -0.05    0.04 
  -1   0   0   -0.06    0.03 
  -1   0   0   -0.03    0.03 
  -1   0   0    0.00    0.05 
  -1   0   0   -0.03    0.04 
  -1   0   0   -0.06    0.03 
  -1   0   0   -0.08    0.03 
  -2   0   0   40.79    1.30 
   2   0   0   39.05    1.27 
  -2   0   0   40.14    1.30 
  -2   0   0   39.23    1.39 
  -2   0   0   40.10    1.32 
  -2   0   0   39.70    1.33 
  -2   0   0   38.87    1.32 
   3   0   0   -0.13    0.09 
  -3   0   0   -0.06    0.15 
  -3   0   0    0.00    0.11 
  -3   0   0   -0.08    0.11 
  -3   0   0    0.18    0.14 
  -3   0   0   -0.07    0.12 
  -3   0   0   -0.02    0.12 
  -4   0   0   62.50    2.01 
   4   0   0   60.23    1.98 
  -4   0   0   56.90    2.04 
  -4   0   0   58.60    1.99 
  -4   0   0   58.53    2.18 
  -4   0   0   60.92    2.08 
  -5   0   0    0.00    0.17 
  -5   0   0    0.09    0.15 
  -5   0   0    0.02    0.13 
   5   0   0    0.22    0.14 
  -5   0   0    0.16    0.14 
  -5   0   0    0.25    0.17 
  -5   0   0    0.12    0.21 
  -6   0   0   25.16    1.34 
  -6   0   0   26.50    1.09 
  -6   0   0   27.04    1.10 
   6   0   0   26.78    1.11 
  -6   0   0   24.56    1.19 
  -6   0   0   25.40    1.17 
  -6   0   0   25.99    1.17 
  -7   0   0    0.34    0.19 
   7   0   0    0.07    0.19 
  -7   0   0    0.53    0.32 
  -7   0   0    0.15    0.22 
  -7   0   0    0.22    0.17 
  -7   0   0    0.40    0.23 
  -7   0   0    0.29    0.22 
  -8   0   0   29.75    1.47 
  -8   0   0   31.77    1.31 
  -8   0   0   31.32    1.47 
   8   0   0   30.92    1.37 
  -8   0   0   33.21    1.46 
  -8   0   0   28.52    1.63 
  -8   0   0   31.07    1.30 
   9   0   0    0.18    0.24 
  -9   0   0   -0.07    0.16 
  -9   0   0    1.03    0.44 
  -9   0   0    0.27    0.25 
  -9   0   0    0.03    0.23 
  -9   0   0    0.11    0.18 
 -10   0   0    6.57    0.82 
 -10   0   0    6.37    0.59 
  10   0   0    5.10    0.66 
 -10   0   0    6.63    0.61 
 -10   0   0    7.02    0.99 
 -11   0   0    0.22    0.23 
 -11   0   0    0.23    0.40 
 -11   0   0    0.29    0.33 
  11   0   0    0.14    0.30 
  11   0   0    0.27    0.24 
 -11   0   0   -0.15    0.20 
  12   0   0   10.22    0.75 
 -12   0   0   12.17    1.21 
  12   0   0   11.40    1.09 
 -12   0   0    8.12    1.21 
 -13   0   0    0.07    0.47 
  13   0   0    0.48    0.41 
 -13   0   0    0.15    0.39 
 -14   0   0   36.89    2.40 
  14   0   0   37.46    2.01 
 -14   0   0   38.56    2.12 
 -15   0   0   -0.32    0.46 
 -15   0   0    0.05    0.41 
 -16   0   0    1.63    0.78 
 -16   0   0    1.93    0.64 
 -17   0   0   -0.24    0.49 
 -17   0   0    0.36    0.52 
 -18   0   0   -0.10    0.42 
 -18   0   0    0.41    0.69 
  -1  -1   0   80.08    2.52 
  -1  -1   0   84.34    2.49 
  -1  -1   0   82.32    2.49 
   1   1   0   84.17    2.50 
  -1   1   0   82.10    2.53 
  -1   1   0   81.28    2.52 
  -1   1   0   87.00    2.53 
  -2  -1   0  187.36    5.71 
  -2  -1   0  193.39    5.71 
  -2  -1   0  183.88    5.71 
   2  -1   0  180.90    5.71 
  -2  -1   0  195.36    5.67 
  -2  -1   0  190.84    5.66 
  -2  -1   0  181.95    5.77 
   2  -1   0  198.20    5.66 
  -2   1   0  190.10    5.71 
   2   1   0  191.87    5.67 
  -2   1   0  184.89    5.70 
  -2   1   0  187.80    5.79 
  -2   1   0  191.15    5.71 
  -2   1   0  194.38    5.72 
  -2   1   0  191.24    5.72 
  -3  -1   0   16.28    0.63 
  -3  -1   0   15.65    0.68 
  -3  -1   0   14.09    0.67 
  -3  -1   0   15.82    0.76 
  -3  -1   0   16.00    0.63 
  -3  -1   0   14.97    0.67 
  -3  -1   0   14.67    0.67 
   3  -1   0   15.69    0.62 
  -3   1   0   15.41    0.67 
  -3   1   0   16.88    0.70 
  -3   1   0   16.17    0.78 
  -3   1   0   14.68    0.67 
  -3   1   0   15.45    0.69 
  -3   1   0   15.96    0.67 
   3   1   0   16.53    0.63 
  -4  -1   0   83.50    2.73 
   4  -1   0   80.81    2.64 
  -4  -1   0   80.44    2.73 
  -4  -1   0   89.86    2.66 
  -4  -1   0   77.99    2.71 
  -4  -1   0   84.23    2.88 
  -4  -1   0   82.56    2.64 
  -4   1   0   80.78    2.73 
  -4   1   0   84.85    2.70 
   4   1   0   83.59    2.65 
  -4   1   0   79.09    2.86 
  -4   1   0   83.31    2.70 
  -4   1   0   83.94    2.73 
  -4   1   0   80.35    2.74 
  -5  -1   0    0.49    0.21 
  -5  -1   0    1.02    0.25 
  -5  -1   0    0.87    0.30 
  -5  -1   0    0.93    0.20 
  -5  -1   0    0.75    0.19 
  -5  -1   0    0.92    0.24 
   5  -1   0    0.93    0.20 
  -5   1   0    1.07    0.25 
  -5   1   0    0.74    0.30 
   5   1   0    0.84    0.20 
  -5   1   0    0.83    0.23 
  -5   1   0    0.57    0.21 
  -5   1   0    0.95    0.22 
  -5   1   0    0.66    0.21 
  -6  -1   0   30.50    1.48 
  -6  -1   0   29.02    1.18 
  -6  -1   0   29.83    1.30 
  -6  -1   0   28.70    1.31 
  -6  -1   0   29.09    1.29 
  -6  -1   0   31.31    1.20 
   6  -1   0   29.74    1.22 
  -6   1   0   32.21    1.31 
  -6   1   0   31.67    1.34 
  -6   1   0   29.65    1.34 
  -6   1   0   29.98    1.48 
   6   1   0   30.12    1.23 
  -6   1   0   30.88    1.25 
  -6   1   0   30.18    1.24 
  -7  -1   0    5.82    0.62 
  -7  -1   0    7.08    0.48 
  -7  -1   0    7.56    0.84 
  -7  -1   0    6.12    0.46 
  -7  -1   0    8.05    0.74 
  -7  -1   0    7.31    0.69 
   7  -1   0    7.54    0.54 
  -7   1   0    5.83    0.56 
  -7   1   0    7.03    0.68 
  -7   1   0    5.46    0.74 
  -7   1   0    5.04    0.60 
  -7   1   0    6.28    0.51 
   7   1   0    7.21    0.54 
  -7   1   0    7.87    0.73 
  -8  -1   0   13.82    1.03 
  -8  -1   0   11.48    0.65 
  -8  -1   0    9.78    0.77 
  -8  -1   0   10.63    0.76 
   8  -1   0    9.83    0.69 
  -8  -1   0   11.01    0.64 
  -8   1   0    9.68    0.75 
   8   1   0   10.29    0.70 
  -8   1   0    9.89    0.66 
  -8   1   0    9.97    0.73 
  -8   1   0   10.43    0.67 
  -8   1   0   10.40    1.09 
  -8   1   0   10.22    0.79 
  -9  -1   0   -0.02    0.25 
  -9  -1   0   -0.10    0.23 
  -9  -1   0    0.09    0.18 
   9  -1   0    0.07    0.20 
  -9  -1   0   -0.13    0.29 
  -9  -1   0    0.02    0.17 
  -9   1   0    0.01    0.20 
  -9   1   0   -0.02    0.31 
  -9   1   0    0.02    0.20 
  -9   1   0   -0.15    0.19 
   9   1   0    0.10    0.24 
  -9   1   0    0.12    0.25 
  10  -1   0   35.79    1.68 
 -10  -1   0   36.70    1.81 
 -10  -1   0   34.18    1.46 
 -10  -1   0   38.08    1.48 
 -10  -1   0   40.83    2.11 
 -10   1   0   36.99    1.54 
 -10   1   0   37.59    2.07 
  10   1   0   39.99    1.73 
 -10   1   0   34.86    1.75 
 -10   1   0   37.03    1.84 
 -10   1   0   36.44    1.54 
  11  -1   0    3.91    0.63 
 -11  -1   0    4.92    0.51 
 -11  -1   0    5.38    0.96 
 -11  -1   0    4.72    0.73 
 -11  -1   0    4.45    0.48 
  11   1   0    5.40    0.56 
 -11   1   0    3.50    0.81 
 -11   1   0    4.47    0.54 
 -11   1   0    4.02    0.72 
  11   1   0    4.56    0.67 
 -11   1   0    4.55    0.54 
 -12  -1   0    6.24    0.86 
  12  -1   0    6.78    0.70 
 -12  -1   0    7.39    1.16 
  12  -1   0    6.11    0.83 
  12   1   0    6.91    0.68 
 -12   1   0    4.91    0.84 
  12   1   0    7.49    0.90 
 -12   1   0    6.24    1.10 
 -13  -1   0    0.09    0.37 
  13  -1   0   -0.32    0.30 
 -13  -1   0   -0.32    0.47 
  13  -1   0    0.07    0.26 
 -13   1   0   -0.28    0.46 
 -13   1   0    0.81    0.49 
  13   1   0    0.13    0.38 
 -14  -1   0    9.45    1.41 
 -14  -1   0    8.36    1.09 
  14  -1   0   11.53    1.21 
 -14   1   0   10.03    1.22 
 -14   1   0   10.91    1.47 
  14   1   0   12.65    1.28 
 -15  -1   0   -0.79    0.31 
 -15  -1   0    0.57    0.59 
 -15   1   0    0.69    0.49 
 -15   1   0    0.40    0.54 
 -16  -1   0   15.72    1.89 
 -16  -1   0   12.47    1.38 
 -16   1   0   12.64    1.45 
 -16   1   0   14.48    1.85 
 -17  -1   0    0.64    0.63 
 -17  -1   0    0.81    0.51 
 -17   1   0    0.72    0.54 
 -17   1   0   -0.09    0.54 
 -18  -1   0    8.44    1.56 
 -18  -1   0    6.17    1.05 
 -18   1   0    6.20    1.05 
 -18   1   0    5.61    1.31 
   0  -2   0  762.69   22.59 
   1  -2   0    8.60    0.31 
  -1  -2   0    8.47    0.30 
  -1  -2   0    7.81    0.31 
   1  -2   0    7.59    0.32 
  -1  -2   0    8.43    0.29 
  -1  -2   0    7.62    0.34 
  -1  -2   0    8.28    0.33 
  -1  -2   0    7.75    0.31 
  -1   2   0    8.60    0.33 
  -1   2   0    8.30    0.32 
  -1   2   0    8.27    0.36 
  -1   2   0    8.57    0.34 
  -1   2   0    8.36    0.34 
   1   2   0    8.39    0.31 
   1   2   0    8.13    0.32 
  -2  -2   0  184.66    5.70 
  -2  -2   0  189.11    5.77 
   2  -2   0  183.78    5.71 
  -2  -2   0  184.55    5.71 
  -2  -2   0  193.09    5.64 
   2  -2   0  187.21    5.66 
  -2  -2   0  182.99    5.64 
  -2   2   0  193.58    5.72 
  -2   2   0  193.00    5.80 
  -2   2   0  194.45    5.72 
  -2   2   0  195.21    5.73 
  -2   2   0  189.81    5.73 
   2   2   0  191.26    5.67 
  -3  -2   0  195.54    5.95 
  -3  -2   0  198.93    5.97 
  -3  -2   0  190.99    6.05 
   3  -2   0  188.12    5.96 
   3  -2   0  197.16    5.88 
  -3  -2   0  196.98    5.87 
  -3  -2   0  192.54    5.86 
  -3   2   0  200.08    6.09 
  -3   2   0  191.22    5.96 
  -3   2   0  199.70    5.97 
   3   2   0  196.85    5.90 
  -3   2   0  196.85    5.97 
  -3   2   0  187.37    5.97 
  -3   2   0  200.48    5.95 
  -4  -2   0   44.57    1.67 
  -4  -2   0   45.46    1.56 
   4  -2   0   47.43    1.71 
  -4  -2   0   46.89    1.79 
  -4  -2   0   46.22    1.57 
   4  -2   0   49.21    1.61 
  -4  -2   0   44.78    1.66 
  -4  -2   0   43.55    1.66 
   4   2   0   46.52    1.61 
  -4   2   0   50.37    1.69 
  -4   2   0   46.20    1.66 
  -4   2   0   48.13    1.83 
  -4   2   0   47.36    1.69 
  -4   2   0   47.42    1.66 
  -4   2   0   46.23    1.70 
  -5  -2   0   29.46    1.24 
  -5  -2   0   30.71    1.12 
  -5  -2   0   30.14    1.24 
  -5  -2   0   27.78    1.23 
   5  -2   0   30.57    1.16 
  -5  -2   0   31.79    1.13 
  -5  -2   0   29.58    1.37 
   5   2   0   31.34    1.18 
  -5   2   0   31.40    1.42 
  -5   2   0   29.93    1.22 
  -5   2   0   28.87    1.24 
  -5   2   0   28.66    1.20 
  -5   2   0   30.59    1.23 
  -5   2   0   28.64    1.26 
  -6  -2   0   30.79    1.17 
  -6  -2   0   30.70    1.17 
   6  -2   0   30.48    1.24 
  -6  -2   0   31.19    1.48 
  -6  -2   0   29.23    1.31 
  -6  -2   0   30.97    1.33 
  -6   2   0   29.71    1.26 
  -6   2   0   33.84    1.30 
   6   2   0   30.51    1.24 
  -6   2   0   27.42    1.45 
  -6   2   0   29.95    1.32 
  -6   2   0   29.89    1.35 
  -6   2   0   29.77    1.29 
   7  -2   0    0.84    0.26 
  -7  -2   0    0.35    0.18 
  -7  -2   0    0.76    0.22 
  -7  -2   0    0.35    0.27 
  -7  -2   0    0.21    0.24 
  -7  -2   0    0.13    0.25 
  -7   2   0    0.86    0.26 
  -7   2   0    0.52    0.25 
  -7   2   0    0.37    0.23 
  -7   2   0    0.48    0.28 
   7   2   0    0.62    0.25 
  -7   2   0    0.19    0.31 
  -7   2   0    0.85    0.26 
  -8  -2   0    5.39    0.64 
   8  -2   0    7.74    0.69 
  -8  -2   0    5.19    0.43 
  -8  -2   0    5.42    0.44 
  -8  -2   0    6.42    0.70 
  -8  -2   0    6.52    0.83 
  -8   2   0    5.16    0.79 
  -8   2   0    6.38    0.61 
  -8   2   0    4.90    0.65 
   8   2   0    5.62    0.59 
  -8   2   0    8.18    0.76 
  -8   2   0    5.95    0.61 
  -8   2   0    7.16    0.75 
  -9  -2   0   11.99    0.97 
   9  -2   0   13.68    0.85 
  -9  -2   0   14.44    0.72 
  -9  -2   0   12.44    1.22 
  -9  -2   0   11.01    0.65 
  -9  -2   0   11.98    0.88 
   9   2   0   12.97    0.84 
  -9   2   0   11.10    0.75 
  -9   2   0   13.39    1.31 
  -9   2   0   11.91    0.76 
  -9   2   0   12.03    0.92 
  -9   2   0   11.57    0.88 
  10  -2   0    5.19    0.67 
 -10  -2   0    4.43    0.47 
 -10  -2   0    4.54    0.80 
 -10  -2   0    4.84    0.72 
 -10  -2   0    5.29    0.50 
 -10   2   0    4.79    0.56 
  10   2   0    5.05    0.65 
 -10   2   0    5.46    0.60 
 -10   2   0    4.63    0.68 
 -10   2   0    2.91    0.68 
  10   2   0    4.83    0.48 
 -10   2   0    3.40    0.62 
  11  -2   0   -0.03    0.29 
 -11  -2   0    0.03    0.19 
 -11  -2   0   -0.23    0.29 
 -11  -2   0   -0.29    0.38 
 -11  -2   0   -0.09    0.17 
 -11   2   0    0.04    0.40 
 -11   2   0    0.23    0.27 
 -11   2   0   -0.05    0.32 
  11   2   0   -0.06    0.21 
 -11   2   0    0.13    0.23 
  11   2   0   -0.23    0.25 
 -12  -2   0   12.15    1.42 
  12  -2   0   14.13    1.06 
 -12  -2   0   12.94    1.07 
 -12   2   0   12.69    1.29 
  12   2   0   11.66    1.11 
 -12   2   0   12.33    1.46 
 -12   2   0   14.89    0.95 
  13  -2   0    0.37    0.31 
 -13  -2   0    0.92    0.45 
 -13  -2   0    0.47    0.53 
  13  -2   0    0.51    0.42 
  13   2   0    0.15    0.39 
 -13   2   0   -0.21    0.35 
 -13   2   0    0.47    0.56 
 -14  -2   0   29.65    2.14 
  14  -2   0   29.20    1.75 
 -14  -2   0   29.23    1.78 
  14   2   0   30.06    1.76 
 -14   2   0   29.55    1.85 
 -14   2   0   29.34    2.13 
  15  -2   0    1.45    0.61 
 -15  -2   0    1.92    0.81 
 -15  -2   0    1.67    0.58 
 -15   2   0    1.63    0.75 
 -15   2   0    1.74    0.62 
 -16  -2   0    6.38    1.29 
 -16  -2   0    6.92    1.03 
 -16   2   0    5.90    1.01 
 -16   2   0    7.76    1.37 
 -17  -2   0    0.13    0.65 
 -17  -2   0    0.41    0.47 
 -17   2   0   -0.43    0.51 
 -17   2   0    0.15    0.46 
 -18  -2   0   -0.28    0.40 
 -18  -2   0   -0.22    0.60 
 -18   2   0    0.41    0.53 
 -18   2   0    0.41    0.70 
   0  -3   0   -0.02    0.03 
   0  -3   0    0.07    0.04 
   0   3   0    0.02    0.03 
   0   3   0    0.06    0.03 
   0   3   0    0.07    0.04 
   0   3   0    0.06    0.04 
  -1  -3   0  101.48    3.07 
  -1  -3   0   95.67    3.04 
  -1  -3   0   99.42    3.01 
  -1  -3   0  101.23    3.01 
   1  -3   0  101.42    3.03 
   1  -3   0   98.76    3.05 
  -1  -3   0  101.87    3.04 
  -1   3   0  101.29    3.06 
  -1   3   0  101.66    3.09 
   1   3   0   98.85    3.04 
   1   3   0  100.30    3.03 
  -1   3   0  104.41    3.07 
  -1   3   0  103.87    3.05 
  -1   3   0  100.18    3.07 
  -2  -3   0    3.32    0.24 
  -2  -3   0    3.10    0.26 
  -2  -3   0    2.90    0.17 
  -2  -3   0    3.15    0.18 
   2  -3   0    3.04    0.20 
  -2  -3   0    2.88    0.21 
   2  -3   0    3.31    0.24 
  -2   3   0    2.76    0.26 
  -2   3   0    3.24    0.32 
  -2   3   0    2.66    0.26 
  -2   3   0    2.93    0.21 
  -2   3   0    2.92    0.24 
   2   3   0    2.69    0.20 
  -3  -3   0  372.33   11.09 
  -3  -3   0  364.35   11.18 
  -3  -3   0  373.07   11.29 
  -3  -3   0  358.94   11.08 
   3  -3   0  371.30   11.13 
   3  -3   0  367.14   11.21 
  -3  -3   0  370.83   11.20 
  -3   3   0  382.01   11.34 
   3   3   0  381.55   11.08 
   3   3   0  389.92   11.15 
  -3   3   0  385.02   11.23 
  -3   3   0  367.12   11.22 
  -3   3   0  378.65   11.21 
  -3   3   0  376.59   11.22 
   4  -3   0  180.74    5.71 
  -4  -3   0  174.30    5.68 
  -4  -3   0  177.49    5.67 
  -4  -3   0  185.24    5.82 
   4  -3   0  184.95    5.60 
  -4  -3   0  188.00    5.56 
  -4  -3   0  180.45    5.54 
  -4   3   0  184.37    5.71 
  -4   3   0  177.17    5.71 
  -4   3   0  188.48    5.88 
  -4   3   0  186.92    5.70 
   4   3   0  188.54    5.63 
  -4   3   0  180.79    5.66 
  -4   3   0  188.60    5.71 
   5  -3   0   68.22    2.24 
  -5  -3   0   66.41    2.32 
  -5  -3   0   65.03    2.16 
   5  -3   0   65.39    2.35 
  -5  -3   0   63.21    2.15 
  -5  -3   0   69.47    2.35 
  -5  -3   0   64.30    2.45 
  -5   3   0   69.23    2.31 
  -5   3   0   63.88    2.35 
  -5   3   0   64.65    2.33 
  -5   3   0   66.07    2.51 
  -5   3   0   65.80    2.32 
  -5   3   0   66.09    2.32 
   5   3   0   67.22    2.25 
  -6  -3   0    5.61    0.66 
  -6  -3   0    6.45    0.53 
  -6  -3   0    5.30    0.54 
   6  -3   0    6.75    0.48 
  -6  -3   0    6.59    0.41 
  -6  -3   0    6.65    0.54 
  -6  -3   0    6.18    0.40 
  -6   3   0    6.14    0.58 
  -6   3   0    5.09    0.66 
  -6   3   0    6.13    0.58 
  -6   3   0    7.04    0.67 
  -6   3   0    6.76    0.52 
   6   3   0    5.92    0.47 
  -6   3   0    6.13    0.52 
   7  -3   0    0.66    0.25 
  -7  -3   0    0.15    0.28 
  -7  -3   0    0.64    0.28 
  -7  -3   0    0.62    0.20 
  -7  -3   0    0.49    0.19 
  -7  -3   0   -0.16    0.21 
  -7   3   0    0.66    0.35 
  -7   3   0    1.05    0.29 
  -7   3   0    0.63    0.26 
  -7   3   0    0.65    0.26 
  -7   3   0    0.80    0.29 
   7   3   0    0.46    0.25 
  -7   3   0    0.18    0.24 
  -8  -3   0   29.16    1.60 
  -8  -3   0   30.91    1.44 
  -8  -3   0   29.84    1.18 
  -8  -3   0   29.04    1.18 
   8  -3   0   29.49    1.34 
  -8  -3   0   28.64    1.41 
   8   3   0   31.95    1.17 
  -8   3   0   30.47    1.38 
  -8   3   0   28.72    1.34 
  -8   3   0   28.31    1.42 
   8   3   0   32.07    1.38 
  -8   3   0   32.67    1.39 
  -8   3   0   28.97    1.48 
  -8   3   0   28.96    1.66 
   9  -3   0    0.16    0.24 
  -9  -3   0    0.62    0.21 
  -9  -3   0    0.71    0.32 
  -9  -3   0    0.58    0.21 
  -9  -3   0    0.18    0.35 
  -9   3   0    1.05    0.37 
  -9   3   0    0.76    0.41 
  -9   3   0    0.83    0.30 
  -9   3   0    0.70    0.34 
   9   3   0    1.12    0.35 
  -9   3   0    0.68    0.30 
   9   3   0    1.13    0.24 
 -10  -3   0    6.02    0.47 
 -10  -3   0    6.90    0.99 
 -10  -3   0    6.05    0.46 
  10  -3   0    5.20    0.66 
 -10  -3   0    7.31    0.84 
  10   3   0    7.20    0.77 
 -10   3   0    5.35    0.63 
  10   3   0    6.23    0.49 
 -10   3   0    6.81    0.83 
 -10   3   0    7.18    1.02 
 -10   3   0    6.46    0.85 
 -10   3   0    6.20    0.66 
 -11  -3   0   10.06    0.62 
 -11  -3   0   12.50    1.39 
  11  -3   0   12.05    0.93 
 -11  -3   0   11.13    0.64 
 -11  -3   0   12.84    1.01 
 -11   3   0   10.42    1.12 
 -11   3   0   10.73    0.78 
 -11   3   0   11.74    1.41 
  11   3   0   12.70    0.95 
 -11   3   0   13.02    0.99 
  11   3   0   12.02    0.71 
 -11   3   0   10.59    0.78 
 -12  -3   0   21.09    1.37 
  12  -3   0   21.15    1.31 
 -12  -3   0   21.56    1.64 
 -12   3   0   18.91    1.08 
  12   3   0   21.32    1.33 
 -12   3   0   19.82    1.41 
 -12   3   0   20.13    1.62 
 -13  -3   0    0.65    0.50 
 -13  -3   0    0.59    0.40 
  13  -3   0    0.50    0.32 
  13  -3   0    0.68    0.42 
 -13   3   0    0.53    0.58 
  13   3   0    0.59    0.41 
 -13   3   0    0.24    0.40 
  14  -3   0    4.41    0.83 
  14  -3   0    3.38    0.67 
 -14  -3   0    2.16    0.74 
 -14  -3   0    2.85    0.66 
 -14   3   0    3.26    0.95 
 -14   3   0    5.04    0.90 
  14   3   0    3.66    0.74 
  15  -3   0    0.73    0.52 
 -15  -3   0    0.45    0.59 
 -15  -3   0    0.63    0.46 
 -15   3   0    0.66    0.57 
 -15   3   0    0.27    0.59 
 -16  -3   0    3.26    0.96 
 -16  -3   0    4.89    0.88 
 -16   3   0    3.83    1.07 
 -16   3   0    2.21    0.72 
 -17  -3   0    3.55    0.77 
 -17  -3   0    3.97    1.07 
 -17   3   0    2.27    0.75 
 -17   3   0    2.95    1.04 
 -18  -3   0    2.13    0.90 
 -18  -3   0    2.47    0.69 
 -18   3   0    3.77    0.92 
 -18   3   0    3.52    1.14 
   0  -4   0   18.01    0.61 
   0  -4   0   17.34    0.61 
   0   4   0   17.42    0.58 
   0   4   0   17.43    0.61 
   0   4   0   18.51    0.61 
   0   4   0   18.98    0.62 
  -1  -4   0   57.25    1.83 
  -1  -4   0   59.23    1.83 
  -1  -4   0   61.16    1.85 
   1  -4   0   58.97    1.85 
  -1  -4   0   59.71    1.83 
   1  -4   0   61.01    1.88 
  -1   4   0   59.17    1.88 
   1   4   0   59.50    1.85 
  -1   4   0   59.06    1.88 
  -1   4   0   58.84    1.85 
   1   4   0   62.35    1.86 
  -1   4   0   59.56    1.90 
   1   4   0   59.83    1.85 
  -1   4   0   61.68    1.89 
  -2  -4   0   12.12    0.46 
  -2  -4   0   12.14    0.53 
  -2  -4   0   10.99    0.54 
  -2  -4   0   12.73    0.46 
  -2  -4   0   11.78    0.50 
   2  -4   0   11.53    0.48 
   2  -4   0   11.96    0.53 
  -2   4   0   12.18    0.60 
  -2   4   0   12.42    0.52 
  -2   4   0   12.14    0.55 
  -2   4   0   12.54    0.54 
   2   4   0   12.12    0.50 
  -2   4   0   13.02    0.56 
  -3  -4   0    5.45    0.28 
   3  -4   0    5.80    0.33 
  -3  -4   0    5.76    0.38 
  -3  -4   0    4.69    0.39 
  -3  -4   0    5.48    0.29 
  -3  -4   0    4.99    0.34 
   3  -4   0    4.97    0.37 
  -3   4   0    5.39    0.51 
   3   4   0    4.89    0.33 
  -3   4   0    5.92    0.41 
  -3   4   0    4.90    0.36 
   3   4   0    5.32    0.22 
  -3   4   0    5.58    0.36 
  -3   4   0    5.40    0.38 
   4  -4   0    2.69    0.28 
  -4  -4   0    2.86    0.23 
   4  -4   0    3.39    0.39 
  -4  -4   0    3.14    0.23 
  -4  -4   0    2.50    0.30 
  -4  -4   0    2.78    0.39 
   4   4   0    2.30    0.28 
  -4   4   0    3.56    0.38 
   4   4   0    2.73    0.18 
  -4   4   0    3.19    0.38 
  -4   4   0    2.71    0.35 
  -4   4   0    2.91    0.42 
  -4   4   0    3.49    0.39 
  -5  -4   0    0.46    0.21 
  -5  -4   0    0.44    0.14 
  -5  -4   0    0.54    0.15 
   5  -4   0    0.56    0.23 
   5  -4   0    0.34    0.17 
  -5  -4   0    0.80    0.22 
  -5  -4   0    0.13    0.22 
   5   4   0    0.57    0.12 
  -5   4   0    0.61    0.21 
  -5   4   0    0.54    0.27 
   5   4   0    0.41    0.18 
  -5   4   0    0.33    0.20 
  -5   4   0    0.48    0.24 
  -5   4   0    0.19    0.17 
   6  -4   0    2.20    0.34 
  -6  -4   0    1.82    0.25 
  -6  -4   0    2.39    0.44 
  -6  -4   0    1.74    0.33 
   6  -4   0    1.89    0.36 
  -6  -4   0    2.14    0.26 
  -6  -4   0    1.77    0.35 
  -6   4   0    2.20    0.37 
  -6   4   0    1.90    0.37 
   6   4   0    2.83    0.25 
  -6   4   0    2.12    0.36 
  -6   4   0    2.84    0.42 
  -6   4   0    2.13    0.38 
   6   4   0    2.60    0.36 
  -6   4   0    1.82    0.44 
  -7  -4   0   58.31    1.95 
   7  -4   0   55.77    2.10 
  -7  -4   0   58.12    2.40 
  -7  -4   0   55.21    1.94 
  -7  -4   0   54.77    2.20 
  -7  -4   0   59.57    2.21 
  -7  -4   0   57.81    2.23 
  -7   4   0   56.54    2.22 
  -7   4   0   58.87    2.19 
  -7   4   0   59.99    2.19 
  -7   4   0   52.71    2.41 
  -7   4   0   60.72    2.18 
   7   4   0   57.91    1.90 
   7   4   0   56.95    2.11 
  -7   4   0   53.93    2.25 
  -8  -4   0    3.88    0.38 
  -8  -4   0    2.21    0.51 
  -8  -4   0    3.36    0.52 
   8  -4   0    3.19    0.46 
  -8  -4   0    2.59    0.46 
  -8  -4   0    3.53    0.36 
  -8   4   0    4.31    0.72 
  -8   4   0    3.86    0.59 
   8   4   0    2.97    0.46 
  -8   4   0    3.12    0.49 
  -8   4   0    3.04    0.45 
  -8   4   0    2.72    0.44 
   8   4   0    3.47    0.35 
  -8   4   0    3.78    0.50 
  -9  -4   0    6.66    0.47 
  -9  -4   0    7.79    0.81 
   9  -4   0    8.43    0.80 
  -9  -4   0    6.53    0.87 
  -9  -4   0    7.95    0.49 
   9   4   0    7.74    0.76 
  -9   4   0    6.76    0.81 
   9   4   0    7.92    0.49 
  -9   4   0    7.95    0.74 
  -9   4   0    8.13    1.05 
  -9   4   0    5.86    0.72 
  -9   4   0    7.03    0.72 
 -10  -4   0    0.49    0.39 
  10  -4   0    0.80    0.35 
 -10  -4   0    0.79    0.24 
 -10  -4   0    0.76    0.22 
 -10  -4   0    0.71    0.36 
  10   4   0    0.69    0.36 
 -10   4   0    0.56    0.36 
 -10   4   0    1.34    0.40 
 -10   4   0    0.79    0.47 
 -10   4   0    1.53    0.39 
 -10   4   0    0.40    0.32 
  10   4   0    1.29    0.27 
 -11  -4   0    7.06    0.86 
 -11  -4   0    9.40    0.56 
 -11  -4   0    9.63    1.21 
  11  -4   0    8.19    0.89 
 -11   4   0    9.62    1.01 
 -11   4   0    8.24    1.17 
 -11   4   0    9.65    1.09 
 -11   4   0    8.04    0.78 
 -11   4   0   10.07    0.77 
  11   4   0    9.54    0.95 
 -12  -4   0    7.89    1.13 
 -12  -4   0    8.39    0.97 
  12  -4   0    8.08    0.94 
 -12   4   0    6.94    0.96 
 -12   4   0    7.98    0.79 
  12   4   0    7.23    0.88 
 -12   4   0    6.67    0.74 
 -12   4   0    6.63    1.12 
 -12   4   0    7.50    0.98 
  13  -4   0    3.09    0.65 
 -13  -4   0    4.45    0.93 
 -13  -4   0    5.91    0.87 
 -13   4   0    4.04    0.82 
  13   4   0    5.40    0.82 
 -13   4   0    3.44    0.93 
 -14  -4   0   14.32    1.18 
  14  -4   0   14.56    1.38 
 -14  -4   0   11.25    1.51 
  14  -4   0   14.29    1.01 
 -14   4   0   14.50    1.54 
 -14   4   0   13.72    1.71 
  14   4   0   14.20    1.34 
 -15  -4   0    1.87    0.60 
 -15  -4   0    2.71    0.84 
  15  -4   0    2.75    0.72 
 -15   4   0    2.26    0.91 
 -15   4   0    0.72    0.56 
 -16  -4   0    4.00    0.80 
 -16  -4   0    4.14    1.06 
 -16   4   0    5.34    1.01 
 -16   4   0    6.98    1.35 
 -17  -4   0   -0.08    0.59 
 -17  -4   0    0.65    0.46 
 -17   4   0    0.02    0.62 
 -17   4   0    0.26    0.50 
 -18  -4   0   -0.22    0.42 
 -18  -4   0    0.06    0.64 
 -18   4   0   -0.37    0.50 
 -18   4   0    0.37    0.79 
   1  -5   0  332.33   10.13 
  -1  -5   0  328.26   10.12 
  -1  -5   0  327.59   10.16 
  -1  -5   0  347.03   10.18 
  -1  -5   0  338.78   10.17 
   1  -5   0  344.17   10.15 
   1   5   0  332.68   10.12 
  -1   5   0  354.14   10.16 
  -1   5   0  358.51   10.19 
   1   5   0  339.05   10.12 
   1   5   0  346.32   10.12 
  -1   5   0  356.94   10.17 
  -1   5   0  339.60   10.16 
  -1   5   0  342.46   10.12 
  -2  -5   0   20.48    0.83 
  -2  -5   0   22.04    0.86 
  -2  -5   0   22.57    0.76 
   2  -5   0   22.37    0.81 
   2  -5   0   20.62    0.84 
  -2  -5   0   20.86    0.80 
  -2  -5   0   22.57    0.77 
   2   5   0   22.97    0.81 
  -2   5   0   22.78    0.88 
  -2   5   0   22.51    0.86 
  -2   5   0   23.06    0.88 
  -2   5   0   22.45    0.83 
   2   5   0   22.95    0.82 
  -2   5   0   22.62    0.91 
  -3  -5   0  147.01    4.63 
  -3  -5   0  144.14    4.59 
  -3  -5   0  151.66    4.50 
  -3  -5   0  145.21    4.69 
   3  -5   0  155.56    4.58 
   3  -5   0  146.97    4.65 
  -3  -5   0  151.57    4.51 
   3   5   0  148.53    4.58 
  -3   5   0  147.85    4.67 
  -3   5   0  148.22    4.76 
  -3   5   0  147.61    4.66 
  -3   5   0  152.30    4.63 
  -3   5   0  150.90    4.68 
  -4  -5   0   94.53    3.09 
  -4  -5   0   88.56    2.80 
  -4  -5   0   87.53    2.97 
   4  -5   0   91.49    3.00 
  -4  -5   0   88.87    2.93 
   4  -5   0   90.03    2.89 
  -4  -5   0   89.10    2.80 
  -4   5   0   90.59    3.14 
   4   5   0   89.89    2.90 
  -4   5   0   89.31    3.01 
  -4   5   0   88.60    2.97 
   4   5   0   91.36    2.72 
  -4   5   0   85.24    2.99 
  -4   5   0   92.72    3.02 
  -5  -5   0   61.88    2.31 
  -5  -5   0   60.20    1.98 
  -5  -5   0   60.69    2.19 
   5  -5   0   57.08    2.20 
  -5  -5   0   58.49    2.14 
   5  -5   0   62.75    2.10 
  -5  -5   0   61.17    1.98 
   5   5   0   62.49    1.91 
  -5   5   0   64.16    2.23 
  -5   5   0   59.53    2.17 
  -5   5   0   60.72    2.21 
  -5   5   0   62.50    2.39 
   5   5   0   59.18    2.09 
  -5   5   0   59.10    2.22 
  -6  -5   0    0.34    0.27 
  -6  -5   0    0.65    0.17 
  -6  -5   0    0.96    0.19 
   6  -5   0    0.68    0.27 
   6  -5   0    1.00    0.25 
  -6  -5   0    0.54    0.26 
  -6  -5   0    0.67    0.23 
  -6   5   0    1.06    0.29 
  -6   5   0    0.72    0.26 
   6   5   0    0.48    0.22 
   6   5   0    1.34    0.18 
  -6   5   0    0.85    0.28 
  -6   5   0    0.83    0.29 
  -6   5   0    0.41    0.30 
   7  -5   0    2.23    0.45 
  -7  -5   0    2.30    0.28 
  -7  -5   0    2.26    0.41 
  -7  -5   0    2.20    0.48 
  -7  -5   0    2.43    0.29 
  -7  -5   0    3.02    0.49 
  -7  -5   0    1.67    0.40 
   7  -5   0    2.57    0.38 
  -7   5   0    1.92    0.39 
   7   5   0    2.51    0.40 
  -7   5   0    2.33    0.42 
  -7   5   0    2.25    0.42 
   7   5   0    2.42    0.25 
  -7   5   0    1.19    0.43 
  -7   5   0    2.71    0.46 
  -7   5   0    2.50    0.39 
  -8  -5   0   10.12    0.75 
  -8  -5   0   10.54    0.56 
  -8  -5   0   11.31    0.92 
  -8  -5   0   10.41    0.79 
   8  -5   0   10.80    0.73 
  -8  -5   0   11.25    0.56 
  -8  -5   0   11.39    0.82 
  -8   5   0   11.28    0.75 
  -8   5   0    9.95    1.09 
  -8   5   0   10.45    0.84 
   8   5   0   10.49    0.73 
  -8   5   0   11.38    0.82 
  -8   5   0    9.68    0.75 
   8   5   0   10.49    0.55 
  -8   5   0   10.30    0.76 
  -9  -5   0    4.13    0.40 
   9  -5   0    3.70    0.54 
  -9  -5   0    3.26    0.54 
  -9  -5   0    3.04    0.62 
  -9  -5   0    4.17    0.39 
  -9   5   0    4.31    0.68 
   9   5   0    3.89    0.39 
  -9   5   0    3.26    0.70 
  -9   5   0    3.98    0.57 
  -9   5   0    3.65    0.56 
   9   5   0    4.81    0.62 
  -9   5   0    3.04    0.51 
  10  -5   0    0.77    0.35 
 -10  -5   0    0.26    0.18 
 -10  -5   0    0.60    0.46 
 -10  -5   0    0.18    0.28 
 -10  -5   0   -0.11    0.15 
 -10   5   0    0.85    0.33 
  10   5   0    0.15    0.30 
 -10   5   0    0.60    0.46 
 -10   5   0   -0.14    0.25 
 -10   5   0    0.41    0.32 
  10   5   0    0.52    0.22 
 -10   5   0    0.44    0.36 
  11  -5   0   12.65    0.97 
 -11  -5   0   15.74    1.28 
 -11  -5   0   12.89    1.01 
 -11   5   0   12.01    1.18 
 -11   5   0   11.16    1.17 
 -11   5   0   12.62    0.89 
 -11   5   0   12.93    1.48 
  11   5   0   11.44    0.94 
 -11   5   0   13.30    0.92 
 -12  -5   0    1.64    0.51 
 -12  -5   0    1.86    0.62 
  12  -5   0    1.13    0.45 
 -12   5   0    1.24    0.40 
 -12   5   0    1.07    0.50 
 -12   5   0    0.98    0.59 
  12   5   0    1.45    0.46 
 -12   5   0    1.46    0.42 
 -12   5   0    1.14    0.46 
 -13  -5   0    0.07    0.34 
 -13  -5   0   -0.19    0.41 
  13  -5   0    0.54    0.43 
  13   5   0    0.19    0.40 
 -13   5   0    0.44    0.55 
 -13   5   0    0.33    0.45 
 -14  -5   0    0.08    0.36 
  14  -5   0    0.09    0.35 
  14  -5   0    0.05    0.42 
 -14  -5   0    0.01    0.48 
 -14   5   0    0.35    0.45 
 -14   5   0    0.40    0.63 
 -15  -5   0    5.87    1.15 
  15  -5   0    5.70    0.99 
 -15  -5   0    4.04    0.74 
 -15   5   0    2.19    0.70 
 -15   5   0    3.41    1.01 
 -16  -5   0    3.52    0.74 
 -16  -5   0    2.26    0.86 
 -16   5   0    3.94    0.91 
 -16   5   0    3.92    1.14 
 -17  -5   0    5.91    1.29 
 -17  -5   0    4.07    0.80 
 -17   5   0    4.93    1.04 
 -17   5   0    4.12    1.16 
 -18  -5   0    3.98    0.83 
 -18  -5   0    4.21    1.09 
 -18   5   0    3.53    0.91 
 -18   5   0    4.45    1.25 
   0  -6   0   35.32    1.15 
   0  -6   0   35.18    1.15 
   0   6   0   34.40    1.11 
   0   6   0   34.53    1.15 
   0   6   0   35.30    1.15 
   0   6   0   34.29    1.16 
  -1  -6   0  114.68    3.58 
   1  -6   0  119.20    3.63 
  -1  -6   0  118.44    3.58 
  -1  -6   0  120.46    3.60 
   1  -6   0  116.01    3.61 
  -1   6   0  112.77    3.63 
   1   6   0  121.43    3.61 
  -1   6   0  118.07    3.59 
   1   6   0  114.29    3.59 
   1   6   0  116.86    3.60 
  -1   6   0  121.84    3.64 
  -1   6   0  120.15    3.64 
  -1   6   0  122.66    3.66 
   1   6   0  118.81    3.56 
  -2  -6   0    4.57    0.25 
   2  -6   0    4.09    0.27 
  -2  -6   0    4.30    0.24 
   2  -6   0    5.08    0.32 
  -2  -6   0    4.39    0.25 
  -2  -6   0    4.47    0.28 
  -2  -6   0    4.64    0.32 
  -2  -6   0    4.25    0.30 
  -2   6   0    4.36    0.29 
  -2   6   0    4.25    0.34 
  -2   6   0    4.53    0.32 
   2   6   0    4.58    0.28 
  -2   6   0    4.94    0.32 
   2   6   0    4.01    0.26 
  -2   6   0    4.91    0.33 
  -3  -6   0   56.58    1.80 
  -3  -6   0   56.34    1.89 
  -3  -6   0   58.27    1.81 
   3  -6   0   55.58    1.88 
  -3  -6   0   55.84    1.94 
   3  -6   0   56.47    1.96 
  -3  -6   0   55.84    1.97 
  -3   6   0   58.25    1.97 
   3   6   0   57.74    1.88 
  -3   6   0   56.31    1.98 
  -3   6   0   55.81    2.05 
  -3   6   0   57.88    1.93 
  -3   6   0   57.02    1.98 
  -4  -6   0    0.60    0.13 
  -4  -6   0    0.74    0.24 
   4  -6   0    0.77    0.18 
  -4  -6   0    0.70    0.22 
  -4  -6   0    0.66    0.14 
   4  -6   0    0.98    0.23 
  -4  -6   0    0.46    0.16 
  -4   6   0    0.63    0.22 
   4   6   0    0.69    0.08 
   4   6   0    0.44    0.17 
  -4   6   0    0.42    0.24 
  -4   6   0    0.26    0.20 
  -4   6   0    0.45    0.17 
  -4   6   0    0.65    0.22 
  -5  -6   0    6.67    0.53 
   5  -6   0    7.51    0.56 
  -5  -6   0    5.63    0.46 
  -5  -6   0    6.67    0.37 
   5  -6   0    6.80    0.46 
  -5  -6   0    5.98    0.61 
  -5  -6   0    7.73    0.39 
   5   6   0    6.13    0.45 
  -5   6   0    6.68    0.54 
  -5   6   0    7.92    0.58 
  -5   6   0    6.37    0.49 
  -5   6   0    7.53    0.57 
  -5   6   0    8.48    0.81 
   5   6   0    7.03    0.31 
  -6  -6   0    1.27    0.28 
  -6  -6   0    1.08    0.29 
  -6  -6   0    1.11    0.19 
  -6  -6   0    1.71    0.38 
   6  -6   0    1.32    0.27 
   6  -6   0    1.50    0.35 
  -6   6   0    1.95    0.37 
  -6   6   0    1.41    0.34 
  -6   6   0    1.48    0.32 
  -6   6   0    1.35    0.40 
  -6   6   0    1.02    0.27 
  -7  -6   0   27.93    1.08 
   7  -6   0   28.47    1.40 
  -7  -6   0   29.18    1.08 
  -7  -6   0   29.30    1.38 
   7  -6   0   28.37    1.27 
  -7  -6   0   27.18    1.29 
  -7  -6   0   28.25    1.47 
  -7   6   0   30.48    1.39 
   7   6   0   31.72    1.30 
  -7   6   0   27.40    1.39 
   7   6   0   30.14    1.05 
  -7   6   0   28.63    1.36 
  -7   6   0   28.41    1.36 
  -7   6   0   27.53    1.54 
   8  -6   0    0.12    0.21 
  -8  -6   0    0.44    0.16 
  -8  -6   0    0.21    0.31 
  -8  -6   0    0.09    0.24 
  -8  -6   0    0.30    0.27 
  -8  -6   0    0.36    0.28 
  -8  -6   0    0.29    0.16 
   8   6   0    0.50    0.17 
  -8   6   0    0.29    0.27 
  -8   6   0    0.53    0.38 
  -8   6   0    0.65    0.29 
  -8   6   0    0.40    0.29 
   8   6   0    0.75    0.28 
  -8   6   0    0.08    0.21 
  -8   6   0    0.25    0.25 
  -9  -6   0   48.78    1.71 
   9  -6   0   51.56    2.05 
  -9  -6   0   48.68    2.06 
  -9  -6   0   47.68    1.71 
  -9  -6   0   47.64    2.29 
  -9   6   0   49.65    2.22 
  -9   6   0   50.38    2.08 
   9   6   0   48.80    2.01 
  -9   6   0   49.38    2.07 
   9   6   0   49.95    1.73 
  -9   6   0   50.83    2.46 
  -9   6   0   48.80    2.12 
  10  -6   0    4.11    0.62 
 -10  -6   0    4.78    0.67 
 -10  -6   0    4.60    0.77 
 -10  -6   0    4.71    0.37 
 -10  -6   0    3.58    0.36 
 -10   6   0    4.15    0.62 
 -10   6   0    3.21    0.59 
  10   6   0    3.90    0.59 
 -10   6   0    4.60    0.63 
 -10   6   0    4.38    0.75 
 -10   6   0    4.87    0.92 
  11  -6   0    0.15    0.32 
 -11  -6   0    0.63    0.47 
 -11  -6   0    0.85    0.41 
 -11   6   0    2.48    0.78 
 -11   6   0    0.95    0.39 
  11   6   0    0.77    0.41 
 -11   6   0    1.63    0.54 
 -11   6   0    1.36    0.42 
 -11   6   0    0.83    0.42 
 -12  -6   0   10.26    1.27 
 -12  -6   0    9.93    1.02 
  12  -6   0   11.26    1.10 
  12   6   0   11.89    1.11 
 -12   6   0   10.65    0.86 
 -12   6   0    9.12    0.91 
 -12   6   0   10.51    1.11 
 -12   6   0   12.96    1.32 
 -12   6   0   11.27    1.43 
 -13  -6   0    3.55    0.68 
  13  -6   0    3.77    0.73 
 -13  -6   0    3.02    0.84 
 -13   6   0    4.58    0.85 
  13   6   0    4.51    0.76 
 -13   6   0    3.48    0.80 
 -13   6   0    3.67    0.92 
 -14  -6   0    5.17    1.05 
 -14  -6   0    6.09    0.87 
  14  -6   0    6.61    0.98 
  14  -6   0    5.02    0.75 
 -14   6   0    5.77    0.96 
 -14   6   0    5.20    1.10 
  15  -6   0    3.62    0.79 
  15  -6   0    3.63    0.67 
 -15  -6   0    3.88    0.74 
 -15  -6   0    3.41    0.92 
 -15   6   0    2.82    0.80 
 -15   6   0    2.47    0.86 
 -16  -6   0    0.19    0.60 
 -16  -6   0   -0.01    0.38 
 -16   6   0    0.18    0.54 
 -16   6   0   -0.46    0.53 
 -17  -6   0    1.82    0.83 
 -17  -6   0    0.99    0.50 
 -17   6   0    1.04    0.63 
 -17   6   0    0.71    0.85 
 -18  -6   0    0.96    0.53 
 -18  -6   0    2.20    0.88 
 -18   6   0    1.34    0.66 
 -18   6   0    1.04    0.88 
   0  -7   0    0.75    0.13 
  -1  -7   0  312.60    9.28 
   1  -7   0  313.89    9.31 
   1  -7   0  322.02    9.33 
  -1  -7   0  313.35    9.29 
  -1   7   0  316.49    9.34 
   1   7   0  305.68    9.24 
  -1   7   0  325.18    9.37 
  -1   7   0  308.26    9.33 
  -1   7   0  308.31    9.33 
   1   7   0  307.07    9.30 
  -1   7   0  308.33    9.28 
   1   7   0  310.67    9.29 
   1   7   0  308.50    9.28 
  -2  -7   0    0.83    0.15 
  -2  -7   0    0.68    0.12 
  -2  -7   0    0.54    0.11 
   2  -7   0    0.69    0.15 
   2  -7   0    0.92    0.17 
  -2  -7   0    0.86    0.14 
  -2   7   0    0.70    0.19 
   2   7   0    0.56    0.13 
  -2   7   0    0.50    0.14 
  -2   7   0    0.96    0.17 
   2   7   0    0.72    0.14 
  -2   7   0    0.94    0.18 
   2   7   0    0.75    0.14 
  -2   7   0    0.39    0.14 
  -3  -7   0   75.62    2.58 
  -3  -7   0   74.12    2.55 
  -3  -7   0   77.55    2.42 
  -3  -7   0   75.66    2.50 
  -3  -7   0   77.45    2.42 
   3  -7   0   78.07    2.51 
   3  -7   0   77.26    2.58 
  -3   7   0   73.77    2.59 
  -3   7   0   76.65    2.68 
   3   7   0   79.08    2.50 
  -3   7   0   82.01    2.62 
  -3   7   0   79.98    2.55 
  -3   7   0   79.79    2.60 
  -4  -7   0  218.25    6.72 
  -4  -7   0  213.97    6.85 
  -4  -7   0  217.34    6.80 
  -4  -7   0  218.75    6.59 
   4  -7   0  223.64    6.84 
  -4  -7   0  217.49    6.60 
   4  -7   0  215.27    6.71 
   4   7   0  220.94    6.71 
  -4   7   0  219.17    6.84 
  -4   7   0  218.15    6.97 
  -4   7   0  228.23    6.86 
  -4   7   0  220.32    6.78 
  -4   7   0  220.65    6.85 
   5  -7   0   23.92    1.01 
  -5  -7   0   22.89    1.09 
  -5  -7   0   24.54    1.17 
   5  -7   0   24.77    1.13 
  -5  -7   0   23.90    0.88 
  -5  -7   0   22.83    1.02 
  -5  -7   0   22.68    0.87 
  -5   7   0   21.78    1.05 
  -5   7   0   25.55    1.15 
  -5   7   0   23.03    1.12 
  -5   7   0   24.10    1.26 
   5   7   0   23.74    0.77 
  -5   7   0   22.01    1.10 
   5   7   0   24.13    1.01 
  -6  -7   0   29.93    1.06 
  -6  -7   0   29.09    1.24 
  -6  -7   0   28.47    1.04 
   6  -7   0   29.81    1.23 
   6  -7   0   28.01    1.33 
  -6  -7   0   28.35    1.38 
  -6  -7   0   26.75    1.28 
  -6   7   0   27.82    1.32 
   6   7   0   28.54    0.97 
  -6   7   0   26.89    1.27 
   6   7   0   28.53    1.21 
  -6   7   0   28.89    1.35 
  -6   7   0   26.65    1.46 
  -6   7   0   29.82    1.35 
   7  -7   0   10.86    0.70 
   7  -7   0   11.12    0.81 
  -7  -7   0   10.20    0.82 
  -7  -7   0   11.46    0.73 
  -7  -7   0   10.31    0.52 
  -7  -7   0    9.94    0.53 
  -7  -7   0   11.96    0.80 
  -7   7   0   10.46    0.80 
  -7   7   0    9.58    0.72 
  -7   7   0   10.12    0.76 
   7   7   0   11.06    0.69 
   7   7   0   11.77    0.50 
  -7   7   0   11.98    0.95 
  -7   7   0   11.92    0.81 
   8  -7   0    5.37    0.60 
  -8  -7   0    5.50    0.37 
  -8  -7   0    4.97    0.36 
  -8  -7   0    4.94    0.73 
  -8  -7   0    5.89    0.65 
  -8  -7   0    4.73    0.64 
  -8   7   0    5.88    0.74 
  -8   7   0    4.84    0.79 
   8   7   0    6.12    0.62 
  -8   7   0    5.50    0.66 
  -8   7   0    5.44    0.66 
   8   7   0    5.87    0.37 
  -8   7   0    5.08    0.65 
   9  -7   0    6.11    0.70 
  -9  -7   0    5.70    0.40 
  -9  -7   0    6.09    0.69 
  -9  -7   0    4.98    0.38 
  -9  -7   0    5.22    0.79 
  -9   7   0    4.65    0.64 
  -9   7   0    4.68    0.66 
  -9   7   0    5.02    0.73 
  -9   7   0    6.70    0.76 
   9   7   0    7.90    0.76 
  -9   7   0    4.49    0.84 
 -10  -7   0    1.87    0.27 
 -10  -7   0    2.36    0.59 
 -10  -7   0    2.30    0.28 
  10  -7   0    2.28    0.51 
 -10  -7   0    1.82    0.45 
 -10   7   0    1.25    0.55 
  10   7   0    1.45    0.45 
 -10   7   0    1.76    0.48 
 -10   7   0    2.05    0.48 
 -10   7   0    1.69    0.45 
 -10   7   0    1.26    0.49 
 -11  -7   0   55.18    2.65 
  11  -7   0   54.88    2.36 
 -11  -7   0   55.78    2.34 
  11   7   0   52.63    2.27 
 -11   7   0   52.92    2.40 
 -11   7   0   53.84    2.29 
 -11   7   0   53.01    2.28 
 -11   7   0   50.99    2.74 
 -11   7   0   53.05    2.53 
  12  -7   0    2.08    0.56 
 -12  -7   0    2.42    0.56 
 -12  -7   0    3.49    0.79 
  12   7   0    3.54    0.65 
 -12   7   0    2.78    0.57 
 -12   7   0    3.73    0.64 
 -12   7   0    2.76    0.65 
 -12   7   0    2.66    0.78 
 -12   7   0    3.37    0.73 
 -13  -7   0    2.51    0.56 
  13  -7   0    3.23    0.69 
 -13  -7   0    2.71    0.77 
  13   7   0    4.13    0.74 
 -13   7   0    5.09    1.09 
 -13   7   0    6.55    0.98 
 -13   7   0    2.58    0.71 
 -14  -7   0   -0.43    0.42 
  14  -7   0   -0.21    0.37 
 -14  -7   0    0.11    0.33 
 -14   7   0   -0.53    0.42 
 -14   7   0    0.00    0.43 
  15  -7   0    3.01    0.72 
  15  -7   0    3.48    0.68 
 -15  -7   0    3.63    0.92 
 -15  -7   0    1.53    0.53 
 -15   7   0    3.10    0.98 
 -15   7   0    3.34    0.83 
  16  -7   0    0.17    0.56 
 -16  -7   0   -0.35    0.31 
 -16  -7   0    0.84    0.63 
 -16   7   0   -0.26    0.54 
 -16   7   0    0.05    0.52 
 -17  -7   0    0.90    0.69 
 -17  -7   0    0.56    0.45 
 -17   7   0    0.02    0.54 
 -17   7   0    0.15    0.73 
 -18  -7   0    8.49    1.17 
 -18  -7   0    8.20    1.48 
 -18   7   0    8.13    1.60 
 -18   7   0    7.46    1.26 
   0  -8   0   42.54    1.40 
   0  -8   0   40.12    1.39 
   0   8   0   41.50    1.34 
   0   8   0   42.42    1.40 
   0   8   0   41.62    1.40 
   0   8   0   42.37    1.40 
   1  -8   0   84.54    2.76 
  -1  -8   0   85.55    2.72 
   1  -8   0   88.18    2.75 
  -1  -8   0   87.40    2.72 
  -1   8   0   85.51    2.71 
   1   8   0   86.83    2.72 
  -1   8   0   88.79    2.77 
  -1   8   0   88.85    2.80 
   1   8   0   85.69    2.66 
  -1   8   0   92.96    2.78 
   1   8   0   87.30    2.74 
  -1   8   0   87.54    2.77 
   1   8   0   84.49    2.72 
  -2  -8   0    2.35    0.22 
  -2  -8   0    2.02    0.22 
  -2  -8   0    2.55    0.23 
   2  -8   0    2.52    0.25 
   2  -8   0    2.67    0.30 
   2   8   0    2.71    0.25 
  -2   8   0    2.36    0.25 
  -2   8   0    2.25    0.30 
   2   8   0    2.05    0.22 
  -2   8   0    2.44    0.29 
  -2   8   0    2.47    0.30 
  -2   8   0    2.45    0.30 
   2   8   0    2.71    0.25 
   3  -8   0    5.43    0.40 
  -3  -8   0    5.29    0.30 
  -3  -8   0    5.25    0.39 
  -3  -8   0    5.29    0.29 
  -3  -8   0    4.86    0.39 
   3  -8   0    5.77    0.36 
  -3  -8   0    5.25    0.35 
  -3  -8   0    5.68    0.30 
  -3   8   0    5.49    0.42 
   3   8   0    5.83    0.36 
  -3   8   0    4.60    0.44 
   3   8   0    5.32    0.34 
  -3   8   0    5.98    0.56 
  -3   8   0    5.95    0.43 
  -3   8   0    4.87    0.37 
  -4  -8   0   -0.13    0.14 
  -4  -8   0    0.24    0.10 
   4  -8   0   -0.20    0.12 
  -4  -8   0    0.07    0.13 
   4  -8   0   -0.04    0.12 
  -4  -8   0   -0.04    0.14 
  -4  -8   0    0.08    0.10 
   4   8   0    0.01    0.13 
  -4   8   0   -0.04    0.11 
  -4   8   0    0.00    0.18 
  -4   8   0   -0.02    0.15 
  -4   8   0   -0.10    0.14 
  -4   8   0    0.21    0.20 
  -5  -8   0  214.23    6.96 
   5  -8   0  223.98    6.81 
   5  -8   0  217.64    6.93 
  -5  -8   0  224.21    6.81 
  -5  -8   0  217.78    6.62 
  -5  -8   0  220.82    6.63 
  -5  -8   0  216.92    6.90 
  -5   8   0  228.07    6.97 
   5   8   0  212.40    6.77 
  -5   8   0  215.43    6.94 
  -5   8   0  226.67    6.90 
  -5   8   0  221.11    7.13 
  -5   8   0  214.67    6.94 
  -6  -8   0   16.73    0.94 
   6  -8   0   18.10    1.00 
  -6  -8   0   17.35    0.70 
  -6  -8   0   16.60    0.69 
  -6  -8   0   15.96    0.85 
   6  -8   0   16.79    0.85 
  -6  -8   0   16.98    1.01 
  -6   8   0   15.63    0.95 
  -6   8   0   17.46    0.98 
  -6   8   0   17.07    1.12 
   6   8   0   16.83    0.59 
  -6   8   0   18.47    1.01 
  -6   8   0   15.69    0.90 
   6   8   0   16.56    0.84 
   7  -8   0   44.42    1.92 
  -7  -8   0   46.58    1.90 
  -7  -8   0   45.77    1.78 
  -7  -8   0   43.45    1.52 
  -7  -8   0   45.68    1.54 
   7  -8   0   45.11    1.77 
  -7  -8   0   42.96    1.95 
  -7   8   0   40.40    1.89 
   7   8   0   44.74    1.75 
   7   8   0   45.88    1.45 
  -7   8   0   41.85    2.06 
  -7   8   0   40.57    1.86 
  -7   8   0   44.55    1.90 
  -7   8   0   45.16    1.86 
  -8  -8   0    0.95    0.18 
  -8  -8   0    1.36    0.32 
  -8  -8   0    1.44    0.43 
   8  -8   0    1.22    0.34 
  -8  -8   0    0.99    0.34 
  -8   8   0    1.14    0.34 
   8   8   0    1.61    0.34 
  -8   8   0    0.99    0.33 
  -8   8   0    1.17    0.35 
  -8   8   0    1.36    0.37 
  -8   8   0    1.26    0.45 
   9  -8   0   68.31    2.65 
  -9  -8   0   67.63    2.29 
  -9  -8   0   74.02    2.99 
  -9  -8   0   70.78    2.67 
  -9  -8   0   70.46    2.29 
  -9   8   0   72.84    2.81 
  -9   8   0   72.05    2.77 
   9   8   0   69.88    2.63 
  -9   8   0   68.23    3.10 
  -9   8   0   65.84    2.84 
  -9   8   0   68.06    2.74 
 -10  -8   0   12.63    0.60 
 -10  -8   0   12.04    0.90 
 -10  -8   0   13.58    1.32 
 -10  -8   0   11.19    0.57 
  10  -8   0   13.02    0.95 
 -10   8   0   11.44    1.33 
 -10   8   0   12.55    0.99 
 -10   8   0   13.13    1.26 
  10   8   0   12.97    0.90 
 -10   8   0   13.78    0.99 
 -10   8   0   11.93    0.94 
 -11  -8   0    3.01    0.55 
  11  -8   0    3.73    0.63 
 -11  -8   0    3.71    0.76 
 -11   8   0    3.16    0.61 
 -11   8   0    4.20    0.76 
 -11   8   0    3.51    0.66 
  11   8   0    3.61    0.61 
 -11   8   0    2.27    0.75 
 -11   8   0    2.90    0.58 
 -12  -8   0    2.89    0.74 
  12  -8   0    4.28    0.72 
 -12  -8   0    2.62    0.55 
 -12   8   0    2.63    0.84 
  12   8   0    3.59    0.65 
 -12   8   0    2.80    0.58 
 -12   8   0    3.15    0.73 
 -12   8   0    3.01    0.65 
 -12   8   0    2.91    0.57 
 -13  -8   0    0.20    0.45 
  13  -8   0   -0.24    0.36 
 -13  -8   0   -0.13    0.31 
  13   8   0    0.02    0.39 
 -13   8   0    1.01    0.53 
 -13   8   0   -0.15    0.48 
 -13   8   0    0.37    0.44 
  14  -8   0    5.13    0.88 
 -14  -8   0    4.47    0.96 
 -14  -8   0    3.95    0.70 
 -14   8   0    5.38    1.15 
 -14   8   0    3.93    0.86 
 -15  -8   0   -0.03    0.36 
 -15  -8   0    1.01    0.64 
  15  -8   0    1.60    0.52 
  15  -8   0    1.06    0.54 
 -15   8   0    0.11    0.58 
 -15   8   0   -0.77    0.36 
 -16  -8   0    0.07    0.58 
 -16  -8   0   -0.08    0.36 
  16  -8   0   -0.12    0.50 
 -16   8   0    0.50    0.74 
 -16   8   0    1.30    0.65 
 -17  -8   0    3.41    1.03 
 -17  -8   0    4.31    0.80 
 -17   8   0    4.74    1.22 
 -17   8   0    3.54    0.91 
 -18  -8   0    0.86    0.78 
 -18   8   0   -0.25    0.61 
 -18   8   0    0.25    0.67 
   0  -9   0   -0.10    0.09 
   0  -9   0   -0.14    0.07 
   0   9   0   -0.10    0.09 
   0   9   0    0.02    0.09 
   0   9   0   -0.09    0.08 
   0   9   0    0.10    0.08 
  -1  -9   0  138.61    4.23 
   1  -9   0  138.97    4.25 
   1  -9   0  137.47    4.27 
  -1  -9   0  143.42    4.23 
  -1   9   0  139.49    4.28 
  -1   9   0  138.14    4.28 
   1   9   0  137.80    4.16 
   1   9   0  132.96    4.24 
   1   9   0  134.53    4.23 
  -1   9   0  140.29    4.22 
   1   9   0  138.50    4.23 
  -1   9   0  135.31    4.27 
  -2  -9   0    0.09    0.08 
   2  -9   0    0.06    0.13 
   2  -9   0    0.28    0.12 
  -2  -9   0    0.23    0.11 
  -2  -9   0    0.16    0.10 
   2   9   0    0.18    0.11 
   2   9   0    0.12    0.10 
  -2   9   0    0.19    0.13 
  -2   9   0    0.00    0.10 
  -2   9   0    0.08    0.13 
   2   9   0    0.15    0.10 
  -2   9   0    0.10    0.13 
  -2   9   0    0.05    0.13 
  -3  -9   0   11.22    0.50 
  -3  -9   0   10.28    0.59 
   3  -9   0   11.77    0.57 
  -3  -9   0   11.32    0.51 
   3  -9   0   12.33    0.65 
  -3  -9   0   10.82    0.49 
  -3  -9   0   11.32    0.55 
   3   9   0   11.92    0.56 
  -3   9   0   11.99    0.60 
  -3   9   0   11.32    0.63 
  -3   9   0   11.97    0.65 
  -3   9   0   12.96    0.73 
   3   9   0   11.09    0.55 
  -3   9   0   11.64    0.65 
   3   9   0   11.30    0.55 
  -4  -9   0  190.65    5.71 
  -4  -9   0  176.57    5.90 
   4  -9   0  189.84    5.84 
  -4  -9   0  186.44    5.95 
   4  -9   0  187.49    5.95 
  -4  -9   0  181.06    5.69 
  -4  -9   0  185.75    5.81 
  -4  -9   0  191.67    5.71 
  -4   9   0  191.29    5.97 
  -4   9   0  192.93    6.12 
  -4   9   0  185.58    5.89 
  -4   9   0  187.48    5.98 
  -4   9   0  200.07    6.01 
   4   9   0  189.27    5.81 
  -5  -9   0   55.77    1.82 
  -5  -9   0   53.32    2.07 
   5  -9   0   54.79    1.99 
  -5  -9   0   54.18    2.12 
  -5  -9   0   54.98    1.98 
   5  -9   0   58.94    2.15 
  -5  -9   0   55.11    1.83 
  -5   9   0   56.25    2.14 
  -5   9   0   54.52    2.05 
  -5   9   0   53.69    2.13 
  -5   9   0   55.45    2.14 
   5   9   0   55.99    1.97 
  -5   9   0   59.50    2.32 
  -6  -9   0   27.41    1.31 
  -6  -9   0   27.56    1.02 
  -6  -9   0   29.48    1.39 
  -6  -9   0   27.81    1.20 
  -6  -9   0   27.76    1.03 
   6  -9   0   28.15    1.35 
   6  -9   0   25.62    1.19 
   6   9   0   29.55    1.21 
  -6   9   0   28.90    1.36 
  -6   9   0   30.13    1.39 
  -6   9   0   26.59    1.33 
  -6   9   0   26.29    1.27 
  -6   9   0   25.16    1.44 
   7  -9   0    0.32    0.23 
  -7  -9   0   -0.05    0.11 
  -7  -9   0   -0.20    0.22 
  -7  -9   0   -0.16    0.22 
  -7  -9   0    0.00    0.11 
  -7  -9   0   -0.17    0.18 
   7  -9   0    0.05    0.26 
  -7   9   0   -0.09    0.30 
  -7   9   0   -0.07    0.25 
   7   9   0   -0.08    0.19 
   7   9   0    0.18    0.08 
  -7   9   0    0.17    0.23 
  -7   9   0   -0.20    0.19 
  -7   9   0    0.19    0.27 
   8  -9   0    0.22    0.25 
  -8  -9   0    0.40    0.15 
  -8  -9   0    0.51    0.15 
  -8  -9   0   -0.31    0.21 
  -8  -9   0    0.41    0.24 
  -8  -9   0    0.65    0.37 
  -8   9   0    0.05    0.26 
   8   9   0    0.32    0.25 
  -8   9   0    0.32    0.34 
  -8   9   0    0.30    0.26 
  -8   9   0    0.24    0.27 
  -8   9   0   -0.16    0.25 
  -9  -9   0   56.80    1.87 
  -9  -9   0   54.47    2.22 
  -9  -9   0   57.06    1.88 
   9  -9   0   52.45    2.23 
  -9  -9   0   55.82    2.50 
   9   9   0   56.83    2.22 
  -9   9   0   55.12    2.35 
  -9   9   0   51.11    2.41 
  -9   9   0   53.28    2.67 
  -9   9   0   59.30    2.39 
  -9   9   0   57.05    2.37 
 -10  -9   0    0.06    0.14 
 -10  -9   0   -0.16    0.30 
 -10  -9   0   -0.18    0.22 
 -10  -9   0   -0.14    0.11 
  10  -9   0    0.01    0.25 
 -10   9   0   -0.21    0.32 
 -10   9   0   -0.12    0.24 
 -10   9   0    0.02    0.32 
 -10   9   0   -0.01    0.31 
 -10   9   0   -0.34    0.35 
  10   9   0    0.47    0.30 
 -11  -9   0   12.42    1.34 
 -11  -9   0   15.72    1.07 
  11  -9   0   18.84    1.19 
 -11   9   0   15.71    1.17 
 -11   9   0   15.15    1.63 
 -11   9   0   17.10    1.15 
 -11   9   0   15.43    1.26 
 -11   9   0   15.24    1.12 
  11   9   0   18.70    1.12 
 -12  -9   0    1.77    0.46 
  12  -9   0    1.98    0.58 
 -12  -9   0    2.11    0.63 
  12   9   0    2.33    0.53 
 -12   9   0    1.43    0.51 
 -12   9   0    2.55    0.57 
 -12   9   0    2.01    0.72 
 -12   9   0    1.50    0.58 
 -12   9   0    2.10    0.55 
 -13  -9   0   19.58    1.56 
 -13  -9   0   17.77    1.24 
  13  -9   0   20.41    1.39 
 -13   9   0   18.42    1.47 
 -13   9   0   17.05    1.91 
  13   9   0   21.46    1.35 
 -13   9   0   17.27    1.32 
  14  -9   0   -0.16    0.37 
 -14  -9   0   -0.28    0.29 
 -14  -9   0   -0.18    0.40 
 -14   9   0   -0.44    0.44 
 -14   9   0    0.25    0.52 
 -14   9   0   -0.12    0.36 
 -15  -9   0    4.02    0.71 
  15  -9   0    5.81    0.99 
 -15  -9   0    3.77    0.92 
  15  -9   0    3.03    0.68 
 -15   9   0    2.65    0.89 
 -15   9   0    3.15    0.86 
  16  -9   0    0.15    0.41 
 -16  -9   0    0.13    0.58 
 -16  -9   0    0.11    0.36 
  16  -9   0    0.31    0.53 
 -16   9   0    0.67    0.70 
 -16   9   0   -1.01    0.36 
 -17  -9   0    1.48    0.54 
 -17  -9   0    1.39    0.75 
 -17   9   0    0.72    0.83 
 -17   9   0    2.01    0.80 
   0 -10   0   95.09    3.01 
   0 -10   0   96.08    3.00 
   0  10   0   95.50    2.93 
   0  10   0   96.19    3.01 
   0  10   0   93.24    3.01 
   0  10   0   93.00    3.00 
   1 -10   0    3.95    0.30 
   1 -10   0    3.38    0.27 
  -1 -10   0    3.47    0.26 
  -1 -10   0    4.12    0.28 
   1  10   0    3.98    0.28 
   1  10   0    3.64    0.22 
   1  10   0    4.02    0.28 
  -1  10   0    3.86    0.30 
  -1  10   0    3.23    0.25 
  -1  10   0    3.77    0.30 
   1  10   0    3.27    0.25 
  -1  10   0    3.68    0.29 
  -2 -10   0   14.48    0.63 
  -2 -10   0   14.53    0.61 
   2 -10   0   15.98    0.67 
   2 -10   0   14.03    0.69 
  -2  10   0   14.59    0.71 
  -2  10   0   15.44    0.71 
  -2  10   0   13.83    0.64 
   2  10   0   14.26    0.58 
  -2  10   0   14.03    0.74 
   2  10   0   15.16    0.64 
   2  10   0   14.24    0.62 
  -2  10   0   15.16    0.72 
   2  10   0   13.56    0.62 
   3 -10   0    1.50    0.24 
  -3 -10   0    1.47    0.22 
  -3 -10   0    1.49    0.20 
  -3 -10   0    1.42    0.19 
   3 -10   0    1.66    0.29 
  -3  10   0    1.66    0.26 
  -3  10   0    2.14    0.34 
   3  10   0    1.17    0.20 
  -3  10   0    1.15    0.30 
   3  10   0    1.49    0.24 
   3  10   0    1.28    0.22 
  -3  10   0    1.28    0.28 
  -3  10   0    1.54    0.29 
  -4 -10   0   93.28    2.94 
  -4 -10   0   92.81    3.04 
   4 -10   0   99.30    3.22 
  -4 -10   0   91.55    2.93 
  -4 -10   0   94.75    3.18 
   4 -10   0   89.89    3.07 
  -4 -10   0   94.56    3.16 
  -4 -10   0   92.07    2.94 
  -4  10   0   94.82    3.21 
  -4  10   0   91.87    3.31 
  -4  10   0   90.69    3.20 
  -4  10   0   93.83    3.12 
  -4  10   0   94.98    3.23 
   4  10   0   95.01    3.04 
   5 -10   0   76.03    2.62 
   5 -10   0   74.06    2.73 
  -5 -10   0   71.63    2.68 
  -5 -10   0   74.43    2.72 
  -5 -10   0   73.64    2.57 
  -5 -10   0   74.92    2.43 
  -5 -10   0   78.11    2.43 
  -5 -10   0   78.95    2.44 
  -5  10   0   76.99    2.91 
  -5  10   0   78.78    2.78 
  -5  10   0   76.47    2.67 
  -5  10   0   76.44    2.76 
   5  10   0   73.38    2.56 
  -5  10   0   75.58    2.76 
  -6 -10   0    1.63    0.23 
   6 -10   0    1.34    0.38 
   6 -10   0    1.20    0.31 
  -6 -10   0    1.37    0.21 
  -6 -10   0    1.92    0.39 
  -6 -10   0    1.49    0.37 
  -6 -10   0    1.52    0.29 
  -6  10   0    1.68    0.40 
   6  10   0    1.15    0.28 
  -6  10   0    1.93    0.42 
  -6  10   0    1.44    0.39 
  -6  10   0    1.02    0.31 
  -6  10   0    1.39    0.43 
  -7 -10   0   69.48    2.20 
   7 -10   0   65.95    2.48 
  -7 -10   0   67.59    2.21 
  -7 -10   0   68.99    2.46 
  -7 -10   0   66.63    2.60 
  -7 -10   0   70.27    2.69 
   7 -10   0   69.74    2.68 
  -7  10   0   59.77    2.60 
  -7  10   0   65.70    2.63 
  -7  10   0   72.67    2.61 
   7  10   0   65.30    2.43 
  -7  10   0   68.13    2.65 
  -7  10   0   63.69    2.82 
  -8 -10   0    3.93    0.31 
  -8 -10   0    4.28    0.31 
  -8 -10   0    4.00    0.66 
  -8 -10   0    4.64    0.55 
   8 -10   0    4.06    0.57 
   8  10   0    4.60    0.54 
  -8  10   0    3.83    0.60 
  -8  10   0    4.85    0.66 
  -8  10   0    3.81    0.73 
  -8  10   0    4.52    0.63 
  -8  10   0    3.81    0.63 
  -9 -10   0    8.35    0.79 
  -9 -10   0    7.48    0.44 
  -9 -10   0    8.30    1.01 
   9 -10   0    7.02    0.77 
  -9 -10   0    8.36    0.46 
  -9  10   0    7.61    0.93 
  -9  10   0    9.13    1.17 
  -9  10   0    9.31    0.94 
   9  10   0    7.81    0.77 
  -9  10   0    8.00    0.89 
  -9  10   0    8.12    0.87 
 -10 -10   0    1.14    0.37 
 -10 -10   0    0.67    0.17 
 -10 -10   0    1.27    0.49 
  10 -10   0    0.93    0.39 
 -10  10   0    1.40    0.56 
 -10  10   0    1.79    0.56 
  10  10   0    1.11    0.37 
 -10  10   0    1.80    0.47 
 -10  10   0    0.94    0.42 
 -10  10   0    1.11    0.44 
 -11 -10   0    0.10    0.39 
 -11 -10   0    0.46    0.34 
  11 -10   0    0.71    0.40 
 -11  10   0    1.00    0.58 
 -11  10   0    1.03    0.46 
 -11  10   0    0.36    0.46 
 -11  10   0    0.36    0.38 
 -11  10   0    0.64    0.42 
  11  10   0    0.00    0.32 
  12 -10   0   -0.29    0.32 
 -12 -10   0   -0.29    0.26 
 -12 -10   0    0.13    0.42 
 -12  10   0   -0.02    0.43 
 -12  10   0   -0.15    0.43 
  12  10   0   -0.58    0.27 
 -12  10   0    0.71    0.43 
 -12  10   0   -0.25    0.34 
 -12  10   0    0.03    0.35 
 -13 -10   0    0.24    0.34 
 -13 -10   0    1.31    0.62 
  13 -10   0    0.49    0.43 
 -13  10   0    0.82    0.63 
 -13  10   0    1.24    0.54 
  13  10   0    0.50    0.42 
 -13  10   0    1.02    0.53 
 -14 -10   0    1.51    0.50 
 -14 -10   0    0.94    0.56 
  14 -10   0    0.32    0.48 
 -14  10   0    1.03    0.72 
 -14  10   0    2.19    0.70 
 -14  10   0    1.66    0.61 
  15 -10   0    0.47    0.49 
 -15 -10   0    1.53    0.65 
  15 -10   0    2.19    0.72 
 -15 -10   0    1.07    0.46 
 -15  10   0    2.18    0.74 
 -15  10   0    1.16    0.75 
  16 -10   0    0.59    0.47 
  16 -10   0    0.81    0.55 
 -16 -10   0    0.20    0.37 
 -16 -10   0   -0.07    0.56 
 -16  10   0    0.54    0.66 
 -16  10   0    0.05    0.49 
 -17 -10   0    7.84    0.97 
 -17 -10   0    4.87    1.10 
 -17  10   0    5.93    1.38 
 -17  10   0    5.23    1.08 
   0 -11   0    0.17    0.10 
   0 -11   0    0.11    0.11 
   0  11   0   -0.04    0.09 
   0  11   0    0.13    0.10 
   0  11   0    0.16    0.09 
   0  11   0    0.10    0.11 
  -1 -11   0    7.80    0.43 
   1 -11   0    7.49    0.43 
   1 -11   0    8.06    0.46 
  -1 -11   0    8.03    0.42 
   1  11   0    7.26    0.42 
  -1  11   0    8.65    0.48 
   1  11   0    7.49    0.41 
   1  11   0    7.13    0.42 
  -1  11   0    7.59    0.41 
   1  11   0    8.25    0.37 
  -1  11   0    7.96    0.47 
  -1  11   0    7.72    0.46 
  -2 -11   0   24.99    0.92 
   2 -11   0   24.32    0.97 
  -2 -11   0   22.48    0.92 
   2 -11   0   23.64    1.00 
  -2  11   0   22.93    1.05 
  -2  11   0   25.47    1.04 
   2  11   0   23.11    0.86 
   2  11   0   23.37    0.93 
  -2  11   0   24.30    0.95 
   2  11   0   25.20    0.95 
  -2  11   0   24.39    1.02 
   2  11   0   23.77    0.92 
  -2  11   0   23.55    1.01 
  -3 -11   0  163.84    4.96 
   3 -11   0  166.22    5.10 
   3 -11   0  159.63    5.00 
  -3 -11   0  163.29    4.90 
  -3 -11   0  157.45    4.89 
   3  11   0  157.62    4.95 
   3  11   0  156.75    4.95 
  -3  11   0  157.45    5.11 
  -3  11   0  161.00    5.01 
   3  11   0  156.95    4.94 
  -3  11   0  158.96    5.09 
  -3  11   0  162.71    5.20 
  -3  11   0  154.42    5.10 
  -4 -11   0    7.34    0.54 
   4 -11   0    6.31    0.46 
  -4 -11   0    6.92    0.37 
  -4 -11   0    7.25    0.39 
  -4 -11   0    6.84    0.44 
   4 -11   0    6.80    0.55 
  -4 -11   0    7.11    0.39 
   4  11   0    7.08    0.45 
  -4  11   0    5.98    0.61 
  -4  11   0    7.74    0.58 
  -4  11   0    5.77    0.47 
   4  11   0    5.44    0.42 
  -4  11   0    5.55    0.58 
   4  11   0    6.38    0.44 
  -4  11   0    7.36    0.75 
  -5 -11   0    5.96    0.36 
   5 -11   0    5.37    0.52 
  -5 -11   0    7.86    0.70 
  -5 -11   0    5.93    0.35 
   5 -11   0    6.76    0.65 
  -5 -11   0    6.29    0.45 
  -5 -11   0    6.69    0.55 
  -5 -11   0    5.39    0.36 
  -5  11   0    5.29    0.69 
  -5  11   0    5.74    0.61 
  -5  11   0    5.73    0.62 
   5  11   0    5.23    0.43 
  -5  11   0    6.25    0.66 
  -5  11   0    5.73    0.56 
  -6 -11   0    7.27    0.73 
   6 -11   0    6.36    0.62 
  -6 -11   0    7.57    0.72 
  -6 -11   0    6.91    0.51 
  -6 -11   0    7.67    0.42 
  -6 -11   0    6.71    0.40 
  -6 -11   0    6.25    0.39 
   6 -11   0    8.14    0.79 
   6  11   0    6.32    0.51 
  -6  11   0    8.58    0.84 
  -6  11   0    8.03    0.78 
  -6  11   0    7.27    0.75 
  -6  11   0    6.46    0.66 
  -6  11   0    7.56    0.87 
  -7 -11   0    7.96    0.44 
  -7 -11   0    7.12    0.42 
  -7 -11   0    7.31    0.57 
   7 -11   0    7.05    0.79 
  -7 -11   0    7.38    0.42 
  -7 -11   0    9.50    0.91 
  -7 -11   0    7.86    0.80 
   7 -11   0    8.12    0.73 
  -7  11   0    8.36    0.68 
  -7  11   0    6.67    0.89 
  -7  11   0    7.84    0.83 
  -7  11   0    7.32    0.80 
  -7  11   0    6.95    0.79 
   7  11   0    7.24    0.57 
  -8 -11   0    0.09    0.12 
  -8 -11   0   -0.58    0.17 
   8 -11   0    0.04    0.24 
  -8 -11   0   -0.02    0.12 
  -8 -11   0   -0.13    0.17 
  -8 -11   0    0.00    0.12 
  -8  11   0    0.03    0.31 
  -8  11   0    0.19    0.29 
  -8  11   0    0.14    0.27 
   8  11   0    0.14    0.22 
  -8  11   0    0.13    0.26 
  -8  11   0   -0.21    0.23 
  -9 -11   0   38.52    1.36 
  -9 -11   0   38.89    1.69 
  -9 -11   0   40.33    1.39 
  -9 -11   0   39.92    1.96 
   9 -11   0   37.88    1.77 
  -9 -11   0   39.65    1.38 
  -9  11   0   36.05    1.85 
  -9  11   0   38.42    1.87 
  -9  11   0   36.63    1.92 
  -9  11   0   38.16    2.16 
  -9  11   0   38.12    1.83 
   9  11   0   39.94    1.71 
 -10 -11   0   -0.37    0.26 
  10 -11   0    0.25    0.32 
 -10 -11   0    0.37    0.29 
 -10  11   0    1.17    0.45 
 -10  11   0    0.78    0.54 
 -10  11   0    0.68    0.40 
 -10  11   0    0.97    0.42 
 -10  11   0    0.81    0.47 
  10  11   0    1.23    0.39 
 -11 -11   0   25.55    1.37 
  11 -11   0   24.43    1.47 
 -11 -11   0   30.33    1.77 
 -11  11   0   24.34    1.81 
  11  11   0   24.87    1.37 
 -11  11   0   26.76    1.69 
 -11  11   0   25.63    1.51 
 -11  11   0   22.96    1.46 
 -11  11   0   23.62    1.46 
 -12 -11   0    0.01    0.37 
  12 -11   0    0.47    0.41 
 -12 -11   0    0.45    0.34 
 -12  11   0    0.39    0.46 
 -12  11   0    0.25    0.36 
 -12  11   0    0.20    0.38 
  12  11   0    0.49    0.35 
 -12  11   0    0.46    0.44 
 -12  11   0    1.12    0.66 
 -13 -11   0    6.77    0.86 
  13 -11   0    6.29    0.95 
 -13 -11   0    6.23    1.03 
 -13  11   0    5.46    1.12 
 -13  11   0    6.64    0.91 
 -13  11   0    5.50    0.98 
 -13  11   0    6.08    0.92 
 -14 -11   0   -0.12    0.44 
 -14 -11   0   -0.43    0.26 
  14 -11   0   -0.23    0.40 
 -14  11   0    0.11    0.39 
 -14  11   0   -0.20    0.40 
 -14  11   0   -0.53    0.51 
  15 -11   0    1.98    0.73 
 -15 -11   0    2.11    0.54 
 -15 -11   0    2.16    0.76 
 -15  11   0    2.40    0.81 
 -15  11   0    3.06    1.03 
  16 -11   0    0.22    0.45 
 -16 -11   0    0.20    0.38 
  16 -11   0    0.42    0.54 
 -16 -11   0    0.49    0.58 
 -16  11   0    0.36    0.55 
 -16  11   0   -0.08    0.57 
 -17 -11   0    4.61    0.75 
 -17 -11   0    3.26    0.99 
 -17  11   0    4.78    1.29 
 -17  11   0    5.98    1.15 
   0 -12   0   10.05    0.53 
   0 -12   0   10.40    0.53 
   0  12   0   10.25    0.54 
   0  12   0   11.38    0.55 
   0  12   0   10.46    0.48 
   0  12   0   10.64    0.55 
  -1 -12   0    0.87    0.19 
  -1 -12   0    0.77    0.18 
   1 -12   0    0.52    0.17 
   1 -12   0    0.64    0.17 
  -1  12   0    0.39    0.14 
   1  12   0    0.70    0.18 
  -1  12   0    0.40    0.16 
   1  12   0    0.43    0.15 
  -1  12   0    0.45    0.17 
   1  12   0    0.53    0.15 
   1  12   0    0.61    0.13 
  -1  12   0    0.75    0.19 
  -2 -12   0    9.94    0.51 
  -2 -12   0    9.61    0.49 
   2 -12   0   10.89    0.60 
   2 -12   0    8.78    0.52 
  -2  12   0    9.50    0.60 
   2  12   0    9.75    0.51 
  -2  12   0    9.59    0.58 
  -2  12   0   10.15    0.52 
   2  12   0    9.88    0.50 
   2  12   0    9.59    0.44 
   2  12   0   10.04    0.52 
  -2  12   0    9.12    0.57 
  -2  12   0    9.37    0.57 
   3 -12   0   36.51    1.49 
   3 -12   0   37.44    1.43 
  -3 -12   0   39.70    1.34 
  -3 -12   0   36.69    1.37 
   3  12   0   37.12    1.38 
  -3  12   0   38.09    1.52 
  -3  12   0   39.73    1.62 
  -3  12   0   36.89    1.42 
  -3  12   0   37.95    1.52 
  -3  12   0   36.15    1.49 
   3  12   0   36.62    1.36 
   3  12   0   38.09    1.38 
  -4 -12   0   19.66    0.79 
   4 -12   0   18.61    0.97 
  -4 -12   0   19.64    0.86 
  -4 -12   0   18.98    0.96 
   4 -12   0   18.72    0.90 
  -4 -12   0   19.14    0.79 
  -4  12   0   20.19    1.03 
  -4  12   0   20.59    0.94 
   4  12   0   18.26    0.85 
  -4  12   0   20.20    1.03 
   4  12   0   19.00    0.85 
  -4  12   0   18.45    1.06 
   4  12   0   18.40    0.84 
  -4  12   0   19.63    1.00 
   5 -12   0   53.51    2.13 
  -5 -12   0   54.84    2.11 
  -5 -12   0   55.33    1.80 
   5 -12   0   55.21    2.02 
  -5 -12   0   53.72    1.83 
  -5 -12   0   50.53    2.07 
  -5 -12   0   54.49    1.83 
  -5 -12   0   54.64    1.95 
   5  12   0   53.22    1.94 
  -5  12   0   56.89    2.17 
  -5  12   0   54.95    2.29 
  -5  12   0   52.01    2.15 
  -5  12   0   53.48    2.05 
  -5  12   0   54.37    2.17 
  -6 -12   0   12.15    0.67 
  -6 -12   0   10.76    0.51 
  -6 -12   0   10.13    0.52 
  -6 -12   0    9.72    0.51 
  -6 -12   0   11.05    0.77 
  -6 -12   0   11.78    0.80 
   6 -12   0    9.50    0.68 
   6 -12   0    9.90    0.79 
  -6  12   0    9.96    0.93 
  -6  12   0   10.33    0.72 
   6  12   0    9.44    0.62 
  -6  12   0   10.36    0.80 
  -6  12   0   10.84    0.81 
  -6  12   0    6.72    0.86 
   7 -12   0   28.42    1.51 
  -7 -12   0   29.30    1.07 
  -7 -12   0   27.52    1.05 
  -7 -12   0   28.28    1.43 
  -7 -12   0   29.18    1.26 
  -7 -12   0   27.40    1.06 
   7 -12   0   28.47    1.33 
  -7  12   0   26.32    1.45 
  -7  12   0   28.61    1.47 
  -7  12   0   27.70    1.45 
   7  12   0   27.54    1.25 
  -7  12   0   27.56    1.62 
  -7  12   0   27.71    1.36 
  -8 -12   0    8.04    0.45 
  -8 -12   0    7.12    0.44 
   8 -12   0    7.10    0.74 
  -8 -12   0    8.76    0.93 
  -8 -12   0    7.23    0.42 
  -8 -12   0    7.40    0.61 
  -8  12   0    7.14    0.99 
  -8  12   0    8.20    0.91 
  -8  12   0    7.61    0.86 
   8  12   0    7.55    0.71 
  -8  12   0    8.38    0.87 
  -8  12   0    8.26    0.89 
  -9 -12   0    1.61    0.50 
   9 -12   0    1.10    0.40 
  -9 -12   0    1.48    0.24 
  -9 -12   0    1.43    0.24 
  -9 -12   0    1.45    0.23 
  -9 -12   0    1.07    0.34 
   9  12   0    2.06    0.45 
  -9  12   0    1.06    0.53 
  -9  12   0    1.59    0.49 
  -9  12   0    2.12    0.58 
  -9  12   0    0.43    0.35 
  -9  12   0    0.57    0.32 
  10 -12   0    0.33    0.36 
 -10 -12   0    0.16    0.35 
 -10 -12   0    0.69    0.32 
 -10  12   0   -0.07    0.41 
  10  12   0    0.10    0.27 
 -10  12   0    0.33    0.34 
 -10  12   0    0.49    0.37 
 -10  12   0    0.64    0.39 
 -10  12   0    0.08    0.34 
 -11 -12   0    0.24    0.40 
  11 -12   0    1.12    0.44 
 -11 -12   0    0.34    0.30 
 -11  12   0   -0.03    0.32 
 -11  12   0    0.02    0.35 
  11  12   0    0.48    0.35 
 -11  12   0    0.21    0.51 
 -11  12   0    0.11    0.33 
 -11  12   0   -0.02    0.40 
 -12 -12   0    1.66    0.45 
 -12 -12   0    1.19    0.53 
  12 -12   0    0.56    0.45 
 -12  12   0    0.18    0.37 
 -12  12   0    0.55    0.43 
 -12  12   0    0.69    0.66 
 -12  12   0    1.25    0.58 
  12  12   0    1.73    0.46 
 -12  12   0    0.82    0.47 
 -13 -12   0    1.11    0.52 
  13 -12   0    1.14    0.55 
 -13 -12   0    0.40    0.35 
 -13  12   0    0.43    0.54 
 -13  12   0    1.04    0.67 
 -13  12   0    0.83    0.52 
 -13  12   0    0.55    0.43 
  14 -12   0    3.02    0.73 
 -14 -12   0    2.61    0.56 
 -14 -12   0    1.25    0.62 
 -14  12   0    3.37    0.99 
 -14  12   0    3.30    0.80 
 -14  12   0    2.75    0.82 
  15 -12   0    0.38    0.57 
 -15 -12   0    0.02    0.36 
 -15 -12   0    0.37    0.60 
 -15  12   0    1.19    0.63 
 -15  12   0   -0.14    0.56 
 -15  12   0    0.02    0.46 
  16 -12   0    1.39    0.68 
  16 -12   0   -0.37    0.41 
 -16 -12   0    0.64    0.40 
 -16 -12   0    0.17    0.59 
 -16  12   0    0.19    0.53 
 -16  12   0    0.84    0.73 
 -17 -12   0    3.77    0.95 
 -17 -12   0    3.97    0.72 
  17 -12   0    3.82    0.82 
 -17  12   0    3.27    1.13 
 -17  12   0    4.38    1.11 
   0 -13   0    0.03    0.12 
   0 -13   0    0.15    0.14 
   0  13   0   -0.12    0.10 
   0  13   0   -0.06    0.12 
   0  13   0    0.01    0.09 
   0  13   0    0.06    0.12 
  -1 -13   0    0.89    0.19 
   1 -13   0    1.17    0.24 
   1 -13   0    1.17    0.23 
  -1 -13   0    1.10    0.19 
   1  13   0    1.01    0.20 
  -1  13   0    1.18    0.23 
   1  13   0    1.04    0.16 
   1  13   0    1.18    0.21 
   1  13   0    1.30    0.23 
  -1  13   0    1.19    0.20 
  -1  13   0    1.14    0.24 
  -1  13   0    1.22    0.25 
   2 -13   0    6.20    0.42 
   2 -13   0    6.38    0.46 
  -2 -13   0    5.68    0.38 
  -2 -13   0    5.69    0.37 
  -2  13   0    5.40    0.39 
   2  13   0    5.73    0.38 
  -2  13   0    5.33    0.43 
  -2  13   0    5.15    0.52 
   2  13   0    5.28    0.32 
  -2  13   0    5.27    0.50 
   2  13   0    6.67    0.41 
  -2  13   0    5.12    0.50 
   2  13   0    5.45    0.38 
   3 -13   0    6.00    0.57 
   3 -13   0    4.45    0.44 
  -3 -13   0    5.26    0.38 
  -3 -13   0    4.65    0.34 
  -3  13   0    5.21    0.54 
   3  13   0    5.31    0.37 
   3  13   0    5.79    0.39 
   3  13   0    5.16    0.34 
  -3  13   0    4.04    0.50 
  -3  13   0    5.49    0.57 
  -3  13   0    4.95    0.46 
   3  13   0    5.08    0.37 
  -3  13   0    4.63    0.56 
   4 -13   0   15.14    0.86 
  -4 -13   0   14.33    0.66 
  -4 -13   0   15.16    0.73 
  -4 -13   0   14.59    0.66 
  -4 -13   0   15.57    0.93 
   4 -13   0   14.40    0.78 
  -4  13   0   12.77    0.90 
  -4  13   0   15.04    0.88 
   4  13   0   14.63    0.72 
  -4  13   0   14.79    0.79 
  -4  13   0   16.34    0.89 
   4  13   0   14.30    0.71 
   4  13   0   14.12    0.72 
  -4  13   0   14.55    0.88 
  -5 -13   0   -0.05    0.15 
   5 -13   0    0.02    0.22 
   5 -13   0    0.31    0.20 
  -5 -13   0   -0.12    0.18 
  -5 -13   0   -0.11    0.11 
  -5 -13   0    0.12    0.12 
   5  13   0   -0.16    0.14 
  -5  13   0   -0.04    0.25 
  -5  13   0    0.51    0.28 
   5  13   0    0.18    0.18 
  -5  13   0   -0.10    0.19 
  -5  13   0   -0.01    0.19 
  -5  13   0    0.11    0.22 
  -6 -13   0    0.32    0.15 
  -6 -13   0    0.20    0.22 
  -6 -13   0    0.25    0.25 
  -6 -13   0    0.26    0.14 
   6 -13   0    0.22    0.26 
  -6 -13   0    0.33    0.20 
   6 -13   0    0.34    0.23 
  -6  13   0    0.33    0.27 
  -6  13   0   -0.12    0.29 
  -6  13   0    0.68    0.34 
   6  13   0    0.18    0.19 
  -6  13   0    0.19    0.24 
  -6  13   0    0.35    0.25 
  -7 -13   0    7.60    0.79 
  -7 -13   0    7.53    0.44 
  -7 -13   0    7.25    0.44 
  -7 -13   0    6.97    0.56 
   7 -13   0    5.90    0.65 
  -7  13   0    9.05    0.94 
  -7  13   0    6.86    0.83 
  -7  13   0    8.11    0.86 
   7  13   0    7.06    0.57 
  -7  13   0    6.71    0.92 
  -7  13   0    7.80    0.81 
   8 -13   0    3.46    0.56 
  -8 -13   0    3.19    0.59 
  -8 -13   0    4.09    0.36 
  -8 -13   0    3.01    0.44 
  -8 -13   0    3.94    0.35 
  -8  13   0    3.85    0.66 
  -8  13   0    3.39    0.63 
   8  13   0    4.37    0.54 
  -8  13   0    4.50    0.64 
  -8  13   0    2.88    0.59 
  -8  13   0    2.91    0.67 
  -9 -13   0   19.39    0.81 
   9 -13   0   18.57    1.17 
  -9 -13   0   19.51    0.82 
  -9 -13   0   20.63    1.10 
  -9 -13   0   20.09    1.30 
  -9  13   0   19.89    1.22 
  -9  13   0   21.18    1.39 
   9  13   0   18.90    1.07 
  -9  13   0   16.18    1.39 
  -9  13   0   19.05    1.26 
  -9  13   0   19.72    1.29 
  10 -13   0    0.93    0.43 
 -10 -13   0    0.74    0.34 
 -10 -13   0    0.53    0.44 
 -10  13   0    1.59    0.54 
 -10  13   0    0.06    0.34 
 -10  13   0    1.71    0.49 
 -10  13   0    0.94    0.49 
  10  13   0    1.22    0.38 
 -10  13   0    0.38    0.47 
  11 -13   0   40.10    1.95 
 -11 -13   0   34.68    2.01 
 -11 -13   0   38.33    1.73 
 -11  13   0   39.40    1.99 
 -11  13   0   36.94    2.34 
 -11  13   0   32.89    2.02 
 -11  13   0   35.79    1.94 
 -11  13   0   36.29    1.93 
  11  13   0   38.67    1.78 
 -12 -13   0   -0.29    0.36 
 -12 -13   0    0.13    0.28 
  12 -13   0   -0.23    0.32 
 -12  13   0   -0.05    0.35 
 -12  13   0    0.17    0.39 
 -12  13   0   -0.36    0.49 
  12  13   0   -0.19    0.28 
 -12  13   0    0.26    0.45 
 -12  13   0    0.32    0.41 
 -13 -13   0    9.85    1.26 
 -13 -13   0    8.92    0.92 
  13 -13   0    9.32    1.12 
 -13  13   0   10.27    1.15 
 -13  13   0    7.50    1.16 
 -13  13   0    9.72    1.18 
 -13  13   0    9.78    1.48 
 -14 -13   0    0.61    0.38 
  14 -13   0    0.83    0.48 
 -14 -13   0    0.67    0.55 
 -14  13   0    0.86    0.55 
 -14  13   0    0.02    0.49 
 -14  13   0    0.11    0.64 
 -15 -13   0    1.58    0.67 
  15 -13   0    2.83    0.79 
 -15 -13   0    2.84    0.60 
 -15  13   0    3.56    1.13 
 -15  13   0    4.06    0.97 
 -15  13   0    1.89    0.71 
 -16 -13   0    1.54    0.72 
 -16 -13   0    0.77    0.43 
  16 -13   0    2.06    0.77 
  16 -13   0    1.06    0.57 
 -16  13   0    1.20    0.79 
 -16  13   0    0.06    0.57 
 -17 -13   0    0.09    0.35 
  17 -13   0   -0.30    0.46 
  17 -13   0   -0.43    0.56 
 -17 -13   0    1.55    0.78 
 -17  13   0    1.00    0.72 
 -17  13   0    0.40    0.74 
   0 -14   0    0.35    0.17 
   0 -14   0    0.32    0.16 
   0  14   0    0.06    0.11 
   0  14   0    0.04    0.15 
   0  14   0    0.23    0.16 
   0  14   0    0.05    0.13 
  -1 -14   0   18.17    0.80 
   1 -14   0   18.29    0.82 
   1 -14   0   17.37    0.84 
  -1 -14   0   16.85    0.79 
  -1  14   0   19.34    0.87 
   1  14   0   19.52    0.83 
  -1  14   0   18.68    0.86 
   1  14   0   18.12    0.80 
   1  14   0   18.16    0.81 
  -1  14   0   18.54    0.86 
   1  14   0   17.62    0.72 
  -1  14   0   17.92    0.77 
   2 -14   0    5.56    0.53 
  -2 -14   0    5.28    0.39 
   2 -14   0    5.42    0.49 
  -2 -14   0    6.12    0.39 
  -2  14   0    6.12    0.50 
  -2  14   0    5.25    0.51 
  -2  14   0    3.94    0.45 
   2  14   0    5.84    0.41 
   2  14   0    5.21    0.32 
  -2  14   0    4.60    0.38 
   2  14   0    5.55    0.40 
  -2  14   0    6.61    0.58 
   2  14   0    4.91    0.36 
   3 -14   0    4.32    0.45 
  -3 -14   0    4.23    0.33 
   3 -14   0    3.83    0.50 
  -3 -14   0    3.22    0.36 
  -3  14   0    5.25    0.56 
  -3  14   0    3.76    0.48 
   3  14   0    3.74    0.30 
   3  14   0    4.85    0.43 
  -3  14   0    3.77    0.41 
   3  14   0    4.11    0.41 
   3  14   0    3.99    0.38 
  -3  14   0    3.84    0.52 
  -3  14   0    4.67    0.53 
   4 -14   0    3.76    0.50 
  -4 -14   0    2.96    0.35 
   4 -14   0    2.71    0.38 
  -4 -14   0    3.08    0.32 
   4  14   0    3.48    0.38 
  -4  14   0    2.94    0.52 
  -4  14   0    2.94    0.47 
   4  14   0    3.25    0.36 
  -4  14   0    3.35    0.51 
  -4  14   0    3.44    0.50 
  -4  14   0    3.15    0.42 
   4  14   0    3.15    0.37 
  -5 -14   0   61.49    2.33 
   5 -14   0   55.59    2.32 
  -5 -14   0   62.99    2.03 
  -5 -14   0   61.33    2.13 
   5 -14   0   58.60    2.21 
  -5  14   0   59.92    2.50 
   5  14   0   59.33    2.12 
  -5  14   0   55.72    2.21 
  -5  14   0   60.01    2.37 
  -5  14   0   60.30    2.39 
  -5  14   0   60.12    2.39 
   5  14   0   59.47    2.13 
   6 -14   0   -0.16    0.19 
  -6 -14   0    0.39    0.15 
  -6 -14   0    0.40    0.16 
   6 -14   0    0.21    0.22 
  -6 -14   0    0.15    0.18 
  -6  14   0    0.54    0.31 
   6  14   0    0.28    0.20 
  -6  14   0    0.32    0.34 
   6  14   0    0.04    0.18 
  -6  14   0    0.15    0.23 
  -6  14   0   -0.22    0.22 
  -6  14   0    0.02    0.21 
  -7 -14   0   46.44    2.03 
  -7 -14   0   46.00    1.64 
  -7 -14   0   46.76    1.82 
   7 -14   0   48.61    1.97 
  -7 -14   0   48.46    1.64 
  -7  14   0   42.45    2.04 
  -7  14   0   47.33    2.12 
  -7  14   0   47.75    2.00 
   7  14   0   44.63    1.81 
  -7  14   0   47.71    2.12 
  -7  14   0   46.25    2.29 
   8 -14   0    7.09    0.76 
  -8 -14   0    7.16    0.44 
  -8 -14   0    6.43    0.79 
  -8 -14   0    7.81    0.46 
  -8 -14   0    6.03    0.62 
  -8  14   0    7.83    0.93 
  -8  14   0    8.88    1.00 
  -8  14   0   10.17    0.97 
   8  14   0    7.03    0.68 
  -8  14   0    9.84    1.22 
  -8  14   0    9.16    1.02 
  -9 -14   0    6.26    0.81 
   9 -14   0    5.11    0.69 
  -9 -14   0    4.32    0.56 
  -9 -14   0    5.21    0.39 
  -9 -14   0    5.71    0.39 
  -9  14   0    4.96    0.80 
  -9  14   0    6.05    0.80 
   9  14   0    5.53    0.66 
  -9  14   0    4.05    0.70 
  -9  14   0    4.69    0.92 
  -9  14   0    6.14    0.91 
  10 -14   0    1.73    0.49 
 -10 -14   0    1.95    0.42 
 -10 -14   0    2.97    0.63 
 -10  14   0    0.78    0.46 
 -10  14   0    2.61    0.59 
 -10  14   0    2.16    0.55 
 -10  14   0    2.83    0.65 
  10  14   0    2.30    0.47 
 -10  14   0    1.76    0.65 
 -11 -14   0    0.46    0.30 
  11 -14   0    0.26    0.37 
 -11 -14   0    0.18    0.38 
 -11  14   0    0.11    0.40 
 -11  14   0    0.18    0.46 
  11  14   0    0.90    0.36 
 -11  14   0    0.29    0.40 
 -11  14   0    0.00    0.30 
 -11  14   0    0.39    0.40 
  12 -14   0   14.40    1.38 
 -12 -14   0   16.31    1.05 
 -12 -14   0   12.73    1.40 
 -12  14   0   17.99    1.30 
 -12  14   0   14.67    1.40 
  12  14   0   15.25    1.07 
 -12  14   0   14.83    1.38 
 -12  14   0   12.87    1.67 
 -12  14   0   15.49    1.58 
 -13 -14   0    0.52    0.34 
  13 -14   0    0.60    0.51 
 -13 -14   0    0.08    0.40 
 -13  14   0    0.43    0.67 
 -13  14   0    0.61    0.56 
 -13  14   0    1.47    0.57 
 -13  14   0    0.57    0.45 
 -14 -14   0    5.52    0.78 
 -14 -14   0    5.25    0.98 
  14 -14   0    6.39    1.02 
 -14  14   0    4.08    1.08 
 -14  14   0    6.66    1.06 
 -14  14   0    7.08    1.20 
 -15 -14   0    0.29    0.34 
  15 -14   0    0.25    0.54 
 -15 -14   0    0.02    0.47 
 -15  14   0   -0.13    0.52 
 -15  14   0   -0.24    0.41 
 -15  14   0    1.01    0.78 
 -16 -14   0    0.31    0.36 
  16 -14   0    0.60    0.52 
  16 -14   0    0.28    0.60 
 -16 -14   0   -0.23    0.52 
 -16  14   0    0.10    0.69 
 -16  14   0   -0.61    0.49 
 -17 -14   0    3.55    1.00 
 -17 -14   0    3.01    0.62 
  17 -14   0    3.39    0.92 
  17 -14   0    3.25    0.80 
 -17  14   0    2.49    1.03 
 -17  14   0    1.79    0.82 
   0 -15   0   -0.17    0.12 
   0 -15   0   -0.04    0.12 
   0  15   0   -0.07    0.09 
   0  15   0   -0.03    0.13 
   0  15   0    0.26    0.17 
   0  15   0   -0.08    0.12 
  -1 -15   0    5.10    0.45 
   1 -15   0    4.39    0.42 
   1 -15   0    5.54    0.51 
  -1 -15   0    4.73    0.38 
   1  15   0    5.26    0.40 
   1  15   0    4.57    0.37 
  -1  15   0    5.20    0.49 
  -1  15   0    4.26    0.34 
   1  15   0    5.26    0.33 
  -1  15   0    4.63    0.46 
  -1  15   0    5.54    0.44 
   1  15   0    5.27    0.38 
   2 -15   0   74.86    2.67 
   2 -15   0   76.88    2.62 
  -2 -15   0   78.01    2.58 
  -2 -15   0   73.66    2.54 
   2  15   0   77.28    2.58 
   2  15   0   77.99    2.57 
   2  15   0   79.41    2.59 
  -2  15   0   74.89    2.69 
  -2  15   0   80.80    2.71 
   2  15   0   76.57    2.47 
  -2  15   0   73.70    2.57 
  -2  15   0   75.07    2.74 
  -2  15   0   78.80    2.71 
  -3 -15   0   17.02    0.74 
  -3 -15   0   14.96    0.75 
   3 -15   0   17.02    0.84 
   3 -15   0   13.65    0.84 
  -3  15   0   15.92    0.89 
   3  15   0   15.97    0.75 
   3  15   0   15.48    0.76 
  -3  15   0   15.76    0.79 
  -3  15   0   15.45    0.88 
  -3  15   0   16.02    0.96 
   3  15   0   15.58    0.76 
   3  15   0   16.98    0.70 
  -3  15   0   15.75    0.89 
   4 -15   0   25.97    1.29 
   4 -15   0   27.76    1.23 
  -4 -15   0   28.71    1.16 
  -4 -15   0   28.60    1.10 
  -4  15   0   28.22    1.36 
   4  15   0   29.21    1.10 
   4  15   0   27.34    1.15 
  -4  15   0   26.56    1.34 
   4  15   0   28.13    1.16 
  -4  15   0   27.98    1.33 
   4  15   0   28.51    1.16 
  -4  15   0   26.79    1.21 
  -4  15   0   26.87    1.42 
  -5 -15   0    0.16    0.17 
  -5 -15   0    0.31    0.15 
   5 -15   0    0.58    0.25 
   5 -15   0    0.14    0.27 
  -5  15   0   -0.39    0.23 
   5  15   0   -0.17    0.13 
   5  15   0   -0.06    0.17 
  -5  15   0    0.18    0.26 
  -5  15   0    0.27    0.26 
  -5  15   0   -0.09    0.19 
  -5  15   0    0.16    0.27 
  -6 -15   0   14.05    0.68 
  -6 -15   0   14.27    0.78 
   6 -15   0   14.53    0.89 
   6 -15   0   13.88    0.96 
  -6  15   0   12.14    0.93 
  -6  15   0   15.58    0.92 
  -6  15   0   13.68    0.99 
  -6  15   0   15.96    1.14 
   6  15   0   15.26    0.81 
  -6  15   0   13.30    0.98 
   6  15   0   14.22    0.79 
   7 -15   0    1.15    0.36 
  -7 -15   0    0.46    0.24 
  -7 -15   0    0.78    0.20 
  -7  15   0    0.61    0.39 
  -7  15   0    1.09    0.36 
   7  15   0    0.65    0.26 
  -7  15   0    0.54    0.37 
   7  15   0    0.65    0.25 
  -7  15   0   -0.42    0.29 
  -7  15   0    0.63    0.37 
  -8 -15   0    0.75    0.28 
  -8 -15   0    0.64    0.19 
   8 -15   0    0.13    0.32 
  -8 -15   0    0.53    0.36 
  -8  15   0   -0.05    0.38 
  -8  15   0    0.71    0.41 
  -8  15   0    1.13    0.44 
  -8  15   0    0.69    0.36 
  -8  15   0    0.62    0.36 
   8  15   0    0.19    0.26 
  -9 -15   0   14.61    1.06 
   9 -15   0   12.00    0.95 
  -9 -15   0   11.10    0.59 
  -9 -15   0   12.80    0.83 
  -9  15   0    9.90    1.08 
   9  15   0   11.94    0.83 
  -9  15   0   11.78    0.95 
  -9  15   0   10.57    1.16 
  -9  15   0   13.34    1.48 
  -9  15   0   12.27    1.22 
 -10 -15   0   -0.60    0.22 
 -10 -15   0    0.11    0.24 
  10 -15   0    0.01    0.35 
 -10  15   0    0.15    0.36 
 -10  15   0    0.81    0.51 
 -10  15   0   -0.03    0.35 
  10  15   0    0.12    0.25 
 -10  15   0   -0.43    0.37 
 -10  15   0   -0.09    0.28 
 -11 -15   0   10.34    0.81 
  11 -15   0   10.20    1.09 
 -11 -15   0    9.83    1.13 
 -11  15   0    8.68    1.06 
 -11  15   0   10.71    1.33 
 -11  15   0   10.31    1.16 
 -11  15   0    9.29    1.11 
 -11  15   0    8.23    1.27 
  11  15   0   10.90    0.86 
  12 -15   0    2.09    0.63 
 -12 -15   0    2.21    0.48 
 -12 -15   0    2.80    0.70 
 -12  15   0    2.63    0.68 
 -12  15   0    2.54    0.62 
 -12  15   0    2.79    0.80 
 -12  15   0    1.56    0.79 
 -12  15   0    1.87    0.57 
  12  15   0    1.68    0.49 
 -13 -15   0    4.44    0.65 
 -13 -15   0    5.60    0.97 
  13 -15   0    4.86    0.88 
 -13  15   0    5.94    1.21 
 -13  15   0    5.41    0.90 
 -13  15   0    6.13    1.09 
 -13  15   0    6.89    0.99 
 -14 -15   0    3.53    0.87 
  14 -15   0    3.28    0.82 
 -14 -15   0    2.24    0.53 
 -14  15   0    4.25    1.16 
 -14  15   0    2.71    0.76 
 -14  15   0    4.20    1.00 
  15 -15   0    6.65    1.10 
 -15 -15   0    5.44    0.74 
 -15 -15   0    5.44    1.06 
 -15  15   0    5.79    1.31 
 -15  15   0    7.24    1.13 
 -15  15   0    6.39    1.14 
 -16 -15   0    3.84    0.66 
 -16 -15   0    3.15    0.86 
  16 -15   0    2.73    0.74 
  16 -15   0    2.86    0.87 
 -16  15   0    3.05    1.08 
 -16  15   0    5.12    1.13 
  17 -15   0    0.14    0.46 
  17 -15   0   -0.19    0.59 
 -17 -15   0   -0.91    0.40 
 -17  15   0    0.76    0.70 
 -17  15   0    0.28    0.68 
   0 -16   0   22.65    1.01 
   0 -16   0   23.31    0.99 
   0  16   0   21.49    1.00 
   0  16   0   23.73    0.92 
   0  16   0   21.81    0.99 
   0  16   0   22.02    0.99 
  -1 -16   0   30.58    1.22 
   1 -16   0   31.33    1.30 
  -1 -16   0   31.33    1.25 
   1 -16   0   32.31    1.27 
  -1  16   0   31.30    1.31 
  -1  16   0   31.55    1.30 
  -1  16   0   30.11    1.19 
  -1  16   0   29.03    1.28 
   1  16   0   32.29    1.25 
   1  16   0   32.53    1.27 
   1  16   0   30.36    1.24 
   1  16   0   30.79    1.14 
  -2 -16   0   48.84    1.71 
  -2 -16   0   49.78    1.74 
   2 -16   0   47.28    1.84 
   2 -16   0   45.12    1.76 
   2  16   0   46.69    1.61 
  -2  16   0   46.79    1.85 
  -2  16   0   47.17    1.72 
   2  16   0   46.84    1.72 
  -2  16   0   51.25    1.88 
  -2  16   0   45.26    1.83 
   2  16   0   48.19    1.74 
   2  16   0   45.49    1.72 
  -2  16   0   47.39    1.90 
   3 -16   0    7.52    0.70 
   3 -16   0    7.70    0.54 
  -3 -16   0    6.60    0.47 
  -3 -16   0    7.31    0.47 
   3  16   0    6.58    0.47 
  -3  16   0    6.25    0.50 
  -3  16   0    7.33    0.60 
  -3  16   0    7.55    0.71 
   3  16   0    6.78    0.42 
  -3  16   0    7.67    0.79 
   3  16   0    6.79    0.47 
  -3  16   0    7.67    0.61 
   3  16   0    7.52    0.49 
  -4 -16   0    1.38    0.25 
   4 -16   0    2.02    0.40 
   4 -16   0    1.80    0.34 
  -4 -16   0    0.96    0.24 
  -4  16   0    2.05    0.40 
   4  16   0    1.02    0.26 
   4  16   0    1.11    0.26 
  -4  16   0    1.47    0.41 
  -4  16   0    0.85    0.33 
  -4  16   0    1.96    0.42 
   4  16   0    1.21    0.24 
   4  16   0    1.24    0.27 
  -4  16   0    1.31    0.31 
  -5 -16   0   31.66    1.32 
   5 -16   0   31.89    1.43 
   5 -16   0   32.21    1.57 
  -5 -16   0   34.34    1.26 
  -5  16   0   32.30    1.44 
  -5  16   0   32.76    1.59 
  -5  16   0   34.08    1.72 
  -5  16   0   31.71    1.57 
  -5  16   0   32.55    1.60 
   5  16   0   33.37    1.34 
   5  16   0   32.79    1.35 
  -6 -16   0    0.12    0.16 
   6 -16   0   -0.24    0.16 
   6 -16   0   -0.01    0.23 
  -6 -16   0    0.01    0.17 
  -6  16   0    0.45    0.31 
  -6  16   0    0.27    0.25 
  -6  16   0    0.43    0.33 
  -6  16   0    0.35    0.28 
   6  16   0    0.08    0.20 
   6  16   0    0.16    0.20 
  -6  16   0    0.25    0.31 
   7 -16   0   19.58    1.12 
  -7 -16   0   20.90    1.02 
  -7 -16   0   19.55    0.85 
   7  16   0   20.06    1.01 
   7  16   0   18.60    1.00 
  -7  16   0   21.67    1.31 
  -7  16   0   20.68    1.29 
  -7  16   0   17.00    1.21 
  -7  16   0   19.40    1.39 
  -7  16   0   17.99    1.12 
  -8 -16   0   10.31    0.57 
   8 -16   0   12.09    0.91 
  -8 -16   0    9.71    0.71 
  -8  16   0   10.61    1.12 
  -8  16   0    7.74    1.10 
   8  16   0   10.79    0.75 
  -8  16   0   10.81    0.87 
  -8  16   0   10.40    1.12 
   8  16   0    8.67    0.70 
  -8  16   0   10.77    1.12 
  -9 -16   0   29.27    1.40 
   9 -16   0   32.93    1.65 
  -9 -16   0   30.25    1.20 
  -9 -16   0   27.70    1.62 
  -9  16   0   32.59    1.66 
  -9  16   0   29.38    1.94 
  -9  16   0   31.46    1.76 
  -9  16   0   32.37    1.78 
   9  16   0   30.22    1.44 
  -9  16   0   32.68    1.85 
  10 -16   0    2.78    0.61 
 -10 -16   0    2.11    0.42 
 -10 -16   0    2.10    0.57 
 -10  16   0    3.05    0.64 
 -10  16   0    2.51    0.66 
  10  16   0    3.22    0.53 
 -10  16   0    3.23    0.86 
 -10  16   0    2.66    0.65 
 -10  16   0    1.74    0.57 
 -11 -16   0    1.83    0.57 
 -11 -16   0    2.49    0.47 
  11 -16   0    2.27    0.61 
 -11  16   0    2.33    0.66 
 -11  16   0    1.77    0.60 
 -11  16   0    1.41    0.58 
 -11  16   0    2.68    0.67 
 -11  16   0    1.65    0.76 
  11  16   0    2.17    0.51 
 -12 -16   0   31.28    1.52 
 -12 -16   0   26.86    1.77 
  12 -16   0   30.33    1.79 
 -12  16   0   31.95    1.87 
 -12  16   0   28.11    1.77 
 -12  16   0   26.64    1.92 
  12  16   0   29.83    1.55 
 -12  16   0   24.69    2.03 
 -12  16   0   31.41    1.80 
 -13 -16   0    7.20    1.08 
 -13 -16   0    9.43    0.93 
  13 -16   0    9.07    1.21 
 -13  16   0    9.09    1.50 
 -13  16   0   10.88    1.25 
 -13  16   0   11.15    1.27 
 -13  16   0    9.82    1.38 
 -14 -16   0    8.85    1.22 
 -14 -16   0   10.79    0.89 
  14 -16   0    9.08    1.22 
 -14  16   0    9.73    1.27 
 -14  16   0   10.80    1.48 
 -14  16   0    9.82    1.59 
  15 -16   0    3.99    0.91 
 -15 -16   0    2.98    0.58 
 -15 -16   0    3.66    0.89 
 -15  16   0    2.62    1.01 
 -15  16   0    3.75    0.87 
 -15  16   0    2.13    0.87 
 -16 -16   0    0.55    0.64 
 -16 -16   0    1.08    0.42 
  16 -16   0    0.03    0.61 
  16 -16   0    0.50    0.52 
 -16  16   0    1.18    0.73 
 -16  16   0    1.18    0.84 
   0 -17   0    0.47    0.20 
   0 -17   0    0.02    0.15 
   0  17   0   -0.06    0.11 
   0  17   0    0.40    0.18 
   0  17   0    0.35    0.18 
   0  17   0    0.09    0.15 
   1 -17   0    0.49    0.21 
  -1 -17   0    0.53    0.20 
   1 -17   0    0.22    0.18 
  -1 -17   0    0.35    0.17 
  -1  17   0    0.42    0.21 
   1  17   0    0.31    0.17 
   1  17   0    0.49    0.19 
  -1  17   0    0.50    0.23 
  -1  17   0    0.16    0.18 
   1  17   0    0.60    0.21 
  -1  17   0    0.41    0.17 
   1  17   0    0.29    0.15 
   2 -17   0   37.18    1.52 
  -2 -17   0   39.01    1.47 
   2 -17   0   40.44    1.62 
  -2 -17   0   38.40    1.49 
  -2  17   0   38.57    1.61 
   2  17   0   39.28    1.49 
   2  17   0   38.71    1.38 
  -2  17   0   36.45    1.59 
  -2  17   0   38.20    1.66 
  -2  17   0   38.71    1.60 
  -2  17   0   38.93    1.49 
   2  17   0   41.32    1.52 
   2  17   0   38.30    1.50 
   3 -17   0    3.70    0.49 
  -3 -17   0    4.34    0.46 
  -3 -17   0    4.50    0.43 
   3 -17   0    4.66    0.51 
  -3  17   0    4.51    0.48 
   3  17   0    4.66    0.48 
  -3  17   0    4.39    0.56 
   3  17   0    4.63    0.48 
   3  17   0    3.90    0.33 
  -3  17   0    3.79    0.59 
  -3  17   0    4.25    0.54 
   3  17   0    3.46    0.40 
  -3  17   0    3.67    0.52 
   4 -17   0   37.72    1.69 
  -4 -17   0   36.44    1.43 
  -4 -17   0   38.13    1.49 
   4 -17   0   37.49    1.59 
   4  17   0   40.76    1.43 
  -4  17   0   39.67    1.73 
  -4  17   0   37.37    1.72 
  -4  17   0   38.53    1.73 
  -4  17   0   38.84    1.58 
  -4  17   0   36.70    1.80 
   4  17   0   39.37    1.52 
   4  17   0   37.89    1.49 
   5 -17   0    0.04    0.24 
   5 -17   0    0.21    0.22 
  -5 -17   0    0.16    0.18 
  -5 -17   0    0.05    0.15 
  -5  17   0    0.18    0.26 
   5  17   0    0.07    0.17 
   5  17   0   -0.06    0.14 
  -5  17   0    0.07    0.23 
  -5  17   0   -0.08    0.28 
  -5  17   0    0.13    0.28 
   5  17   0    0.51    0.23 
  -5  17   0    0.16    0.21 
   6 -17   0   30.43    1.41 
  -6 -17   0   27.76    1.12 
  -6 -17   0   28.98    1.24 
  -6  17   0   30.23    1.55 
  -6  17   0   26.50    1.50 
  -6  17   0   26.71    1.35 
   6  17   0   28.48    1.26 
  -6  17   0   25.84    1.59 
  -6  17   0   25.89    1.49 
   6  17   0   27.20    1.23 
   7 -17   0   20.27    1.18 
  -7 -17   0   21.54    0.91 
  -7 -17   0   21.03    1.05 
   7  17   0   20.05    1.06 
  -7  17   0   21.78    1.35 
  -7  17   0   20.67    1.46 
   7  17   0   19.10    1.02 
  -7  17   0   22.90    1.37 
  -7  17   0   20.41    1.31 
  -7  17   0   18.98    1.15 
   8 -17   0    3.36    0.56 
  -8 -17   0    3.85    0.50 
  -8 -17   0    3.41    0.37 
   8  17   0    4.51    0.57 
  -8  17   0    4.07    0.72 
  -8  17   0    3.31    0.80 
  -8  17   0    2.39    0.62 
  -8  17   0    3.66    0.61 
   8  17   0    4.29    0.55 
  -8  17   0    3.35    0.69 
  -9 -17   0    3.14    0.48 
   9 -17   0    3.56    0.64 
  -9  17   0    2.86    0.60 
   9  17   0    4.06    0.56 
  -9  17   0    3.79    0.74 
  -9  17   0    3.78    0.83 
  -9  17   0    3.53    0.77 
  -9  17   0    3.84    0.76 
   9  17   0    5.13    0.61 
  10 -17   0    4.89    0.76 
 -10 -17   0    6.10    0.87 
 -10 -17   0    4.89    0.60 
 -10  17   0    5.31    0.87 
 -10  17   0    6.37    1.01 
 -10  17   0    5.10    0.87 
 -10  17   0    5.80    1.10 
 -10  17   0    6.19    0.86 
  10  17   0    5.95    0.70 
 -11 -17   0    4.07    0.59 
  11 -17   0    2.96    0.68 
 -11 -17   0    2.38    0.63 
 -11  17   0    3.68    0.80 
 -11  17   0    3.75    0.73 
  11  17   0    4.59    0.66 
 -11  17   0    3.16    0.79 
 -11  17   0    3.01    0.72 
 -11  17   0    3.99    0.97 
 -12 -17   0    0.02    0.39 
 -12 -17   0    0.53    0.32 
  12 -17   0    0.71    0.45 
 -12  17   0    0.12    0.57 
 -12  17   0   -0.11    0.43 
  12  17   0   -0.04    0.32 
 -12  17   0    0.87    0.50 
 -12  17   0    0.10    0.42 
 -12  17   0    0.23    0.50 
 -13 -17   0    3.72    0.59 
  13 -17   0    2.15    0.70 
 -13 -17   0    2.83    0.73 
 -13  17   0    4.12    0.81 
 -13  17   0    2.94    0.98 
 -13  17   0    3.00    0.77 
 -13  17   0    3.88    0.90 
  14 -17   0   -0.22    0.46 
 -14 -17   0    0.70    0.38 
 -14 -17   0    0.39    0.49 
 -14  17   0    0.05    0.57 
 -14  17   0    1.80    0.70 
 -14  17   0    0.14    0.52 
 -15 -17   0    2.24    0.74 
  15 -17   0    2.59    0.78 
 -15 -17   0    2.09    0.50 
 -15  17   0    3.19    0.92 
 -15  17   0    1.85    0.71 
 -15  17   0    2.49    0.94 
 -16 -17   0    4.73    1.06 
  16 -17   0    3.28    0.93 
 -16 -17   0    6.02    0.78 
  16 -17   0    3.58    0.84 
 -16  17   0    6.19    1.39 
 -16  17   0    4.31    1.08 
   0 -18   0   72.65    2.62 
   0 -18   0   78.09    2.68 
   0  18   0   77.79    2.69 
   0  18   0   77.02    2.68 
   0  18   0   75.83    2.67 
   0  18   0   77.45    2.55 
  -1 -18   0    0.08    0.16 
  -1 -18   0    0.04    0.14 
   1 -18   0   -0.12    0.13 
   1 -18   0    0.11    0.17 
   1  18   0   -0.05    0.14 
  -1  18   0    0.24    0.19 
   1  18   0    0.07    0.17 
   1  18   0    0.16    0.14 
  -1  18   0   -0.02    0.18 
  -1  18   0   -0.18    0.13 
   1  18   0    0.19    0.17 
  -1  18   0    0.07    0.19 
  -2 -18   0    8.75    0.57 
   2 -18   0    8.80    0.59 
   2 -18   0    8.44    0.63 
  -2 -18   0    8.95    0.55 
   2  18   0    7.79    0.55 
   2  18   0    7.90    0.54 
  -2  18   0    8.30    0.55 
   2  18   0    7.75    0.54 
  -2  18   0    8.18    0.62 
   2  18   0    7.71    0.47 
  -2  18   0    8.56    0.68 
  -2  18   0    8.23    0.62 
  -2  18   0    8.75    0.64 
  -3 -18   0    2.21    0.31 
   3 -18   0    1.50    0.36 
  -3 -18   0    2.11    0.32 
   3 -18   0    1.64    0.33 
  -3  18   0    1.78    0.38 
   3  18   0    1.53    0.28 
   3  18   0    2.24    0.35 
  -3  18   0    2.53    0.49 
  -3  18   0    2.63    0.47 
  -3  18   0    1.88    0.35 
  -3  18   0    1.55    0.38 
   3  18   0    1.59    0.25 
  -4 -18   0    9.14    0.61 
   4 -18   0   10.60    0.72 
   4 -18   0   10.28    0.79 
  -4 -18   0    9.60    0.59 
  -4  18   0    9.03    0.96 
  -4  18   0   11.64    0.72 
   4  18   0   10.19    0.56 
  -4  18   0   10.25    0.79 
  -4  18   0   11.59    0.83 
   4  18   0    9.22    0.61 
   4  18   0    8.67    0.60 
  -4  18   0   10.28    0.79 
  -5 -18   0    5.36    0.48 
  -5 -18   0    6.61    0.60 
   5 -18   0    5.95    0.72 
   5 -18   0    5.68    0.63 
   5  18   0    5.30    0.53 
  -5  18   0    5.08    0.77 
   5  18   0    6.66    0.60 
  -5  18   0    5.00    0.68 
   5  18   0    5.24    0.42 
  -5  18   0    6.44    0.79 
  -5  18   0    5.76    0.65 
  -5  18   0    5.14    0.72 
   6 -18   0    7.92    0.79 
  -6 -18   0    8.22    0.60 
  -6 -18   0    7.58    0.51 
  -6  18   0    6.63    0.84 
   6  18   0    7.08    0.65 
  -6  18   0    7.39    0.99 
  -6  18   0   10.01    1.04 
  -6  18   0    8.22    0.81 
   6  18   0    7.62    0.68 
  -6  18   0    6.84    0.85 
   7 -18   0   21.24    1.24 
  -7 -18   0   22.91    0.98 
  -7 -18   0   21.95    1.09 
  -7  18   0   21.64    1.41 
   7  18   0   23.91    1.14 
  -7  18   0   22.06    1.41 
  -7  18   0   23.98    1.45 
  -7  18   0   22.04    1.55 
  -7  18   0   22.04    1.25 
   7  18   0   23.67    1.15 
  -8 -18   0   25.54    1.23 
   8 -18   0   24.79    1.41 
  -8 -18   0   25.77    1.05 
   8  18   0   27.05    1.28 
   8  18   0   24.86    1.23 
  -8  18   0   23.50    1.55 
  -8  18   0   24.99    1.41 
  -8  18   0   23.72    1.54 
  -8  18   0   24.61    1.53 
  -8  18   0   26.04    1.79 
  -9 -18   0    4.28    0.53 
   9 -18   0    3.52    0.64 
   9  18   0    4.80    0.62 
  -9  18   0    4.15    0.81 
  -9  18   0    4.49    0.70 
  -9  18   0    3.07    0.85 
  -9  18   0    4.56    0.82 
  -9  18   0    3.37    0.69 
   9  18   0    3.68    0.54 
  10 -18   0    1.87    0.54 
 -10 -18   0    2.68    0.46 
 -10  18   0    4.14    0.96 
 -10  18   0    3.72    0.79 
  10  18   0    3.23    0.53 
  10  18   0    1.93    0.45 
 -10  18   0    1.90    0.64 
 -10  18   0    2.98    0.64 
 -10  18   0    3.46    0.76 
 -11 -18   0    1.00    0.49 
  11 -18   0    1.75    0.57 
 -11 -18   0    0.81    0.33 
  11  18   0    0.86    0.38 
 -11  18   0    1.48    0.62 
 -11  18   0    1.78    0.58 
 -11  18   0    0.69    0.65 
 -11  18   0    1.17    0.59 
 -11  18   0    1.46    0.63 
 -12 -18   0   18.05    1.43 
  12 -18   0   18.25    1.39 
 -12 -18   0   20.15    1.17 
 -12  18   0   22.87    2.32 
 -12  18   0   20.74    1.55 
 -12  18   0   21.19    1.56 
 -12  18   0   20.11    1.46 
 -12  18   0   22.25    1.74 
 -13 -18   0    3.84    0.58 
 -13 -18   0    3.92    0.85 
  13 -18   0    3.01    0.78 
 -13  18   0    4.55    0.89 
 -13  18   0    3.95    1.14 
 -13  18   0    3.54    0.81 
 -13  18   0    3.71    0.95 
 -14 -18   0   19.31    1.17 
 -14 -18   0   15.46    1.62 
  14 -18   0   15.74    1.64 
 -14  18   0   16.72    2.09 
 -14  18   0   17.51    1.45 
 -14  18   0   16.71    1.91 
 -15 -18   0    2.16    0.50 
 -15 -18   0    4.12    0.96 
  15 -18   0    2.74    0.81 
 -15  18   0    5.23    1.30 
 -15  18   0    2.10    0.73 
 -15  18   0    2.89    0.94 
  16 -18   0    1.01    0.60 
 -16 -18   0    1.31    0.71 
  16 -18   0    1.49    0.76 
 -16 -18   0    1.44    0.44 
 -16  18   0    0.75    0.83 
 -16  18   0    1.85    0.71 
 -16  18   0    0.14    0.66 
   0 -19   0    0.44    0.22 
   0 -19   0    0.17    0.18 
   0  19   0    0.08    0.16 
   0  19   0    0.25    0.20 
   0  19   0    0.19    0.15 
   1 -19   0    6.33    0.51 
  -1 -19   0    5.83    0.49 
   1 -19   0    5.85    0.59 
  -1 -19   0    5.66    0.53 
   1  19   0    6.56    0.51 
  -1  19   0    6.47    0.47 
  -1  19   0    6.54    0.63 
   1  19   0    6.36    0.43 
   1  19   0    6.23    0.58 
  -1  19   0    7.07    0.67 
  -1  19   0    6.61    0.62 
   1  19   0    6.88    0.51 
  -2 -19   0   72.33    2.52 
   2 -19   0   69.90    2.55 
  -2 -19   0   70.43    2.48 
   2 -19   0   72.14    2.65 
   2  19   0   75.36    2.52 
  -2  19   0   72.84    2.67 
   2  19   0   70.76    2.59 
  -2  19   0   70.14    2.64 
   2  19   0   69.67    2.50 
  -2  19   0   70.26    2.65 
   2  19   0   72.13    2.38 
  -2  19   0   70.80    2.72 
  -2  19   0   70.68    2.49 
   3 -19   0    0.10    0.21 
  -3 -19   0    0.27    0.17 
  -3 -19   0    0.18    0.18 
   3 -19   0    0.45    0.26 
  -3  19   0    0.52    0.27 
   3  19   0   -0.04    0.16 
  -3  19   0    0.08    0.18 
  -3  19   0    0.43    0.26 
   3  19   0    0.22    0.16 
  -3  19   0    0.16    0.23 
  -3  19   0    0.47    0.31 
   3  19   0    0.15    0.17 
   4 -19   0   17.74    0.98 
  -4 -19   0   16.35    0.87 
  -4 -19   0   17.93    0.85 
   4 -19   0   17.17    1.07 
  -4  19   0   17.23    1.07 
  -4  19   0   17.36    1.07 
  -4  19   0   17.21    1.07 
   4  19   0   17.14    0.89 
  -4  19   0   18.21    0.95 
   4  19   0   16.35    0.86 
  -4  19   0   16.30    1.13 
   4  19   0   17.33    0.79 
   5 -19   0    0.66    0.35 
  -5 -19   0    1.02    0.29 
   5 -19   0    1.36    0.36 
  -5 -19   0    1.47    0.28 
  -5  19   0    1.30    0.36 
  -5  19   0    0.76    0.39 
   5  19   0    1.43    0.32 
  -5  19   0    1.43    0.51 
  -5  19   0    1.05    0.41 
  -5  19   0    1.70    0.47 
   5  19   0    1.20    0.27 
   5  19   0    0.75    0.26 
  -6 -19   0   31.98    1.34 
   6 -19   0   29.13    1.47 
  -6 -19   0   31.69    1.23 
   6  19   0   29.46    1.26 
   6  19   0   30.29    1.33 
  -6  19   0   31.34    1.66 
  -6  19   0   29.64    1.64 
  -6  19   0   27.98    1.75 
  -6  19   0   28.65    1.44 
   6  19   0   28.92    1.33 
  -6  19   0   27.75    1.62 
  -7 -19   0    3.45    0.39 
   7 -19   0    3.11    0.58 
  -7 -19   0    3.30    0.46 
  -7  19   0    2.64    0.61 
  -7  19   0    3.98    0.63 
  -7  19   0    4.80    0.78 
   7  19   0    2.89    0.48 
  -7  19   0    3.99    0.72 
   7  19   0    2.97    0.45 
  -7  19   0    3.70    0.78 
  -8 -19   0    6.62    0.48 
  -8 -19   0    8.56    0.65 
   8 -19   0    5.73    0.77 
  -8  19   0    7.67    1.16 
  -8  19   0    7.38    1.01 
  -8  19   0    7.91    1.01 
   8  19   0    6.68    0.67 
  -8  19   0    6.23    0.93 
   8  19   0    7.57    0.75 
  -8  19   0    7.21    0.87 
   9 -19   0    0.74    0.41 
  -9 -19   0    0.44    0.27 
  -9  19   0    0.63    0.59 
  -9  19   0    0.08    0.38 
  -9  19   0    0.77    0.52 
   9  19   0    0.57    0.29 
   9  19   0    0.44    0.31 
  -9  19   0    0.20    0.43 
  -9  19   0    0.06    0.34 
  10 -19   0   14.82    1.36 
 -10 -19   0   17.31    1.00 
  10  19   0   14.42    0.98 
 -10  19   0   13.58    1.45 
 -10  19   0   16.16    1.78 
 -10  19   0   14.90    1.50 
 -10  19   0   15.26    1.16 
  10  19   0   14.92    0.99 
 -10  19   0   16.87    1.56 
  11 -19   0   -0.13    0.39 
 -11 -19   0    1.67    0.39 
  11  19   0    0.86    0.36 
 -11  19   0    0.85    0.45 
 -11  19   0    1.23    0.59 
 -11  19   0    1.47    0.61 
 -11  19   0    0.43    0.47 
  11  19   0    0.73    0.39 
 -11  19   0    1.28    0.65 
  12 -19   0    1.66    0.60 
 -12 -19   0    1.38    0.40 
 -12  19   0    1.64    0.83 
 -12  19   0    1.85    0.65 
 -12  19   0    2.69    0.84 
 -12  19   0    2.25    0.70 
 -12  19   0    1.66    0.59 
  13 -19   0    1.50    0.62 
 -13 -19   0    1.13    0.37 
 -13 -19   0    0.80    0.51 
 -13  19   0    0.80    0.59 
 -13  19   0    1.16    0.73 
 -13  19   0    0.83    0.78 
 -13  19   0    1.20    0.60 
 -14 -19   0    1.00    0.40 
  14 -19   0    0.51    0.58 
 -14 -19   0    2.14    0.75 
 -14  19   0    2.28    0.94 
 -14  19   0    1.61    0.69 
 -14  19   0    1.83    0.79 
 -15 -19   0    1.49    0.67 
 -15 -19   0    0.29    0.34 
  15 -19   0    0.68    0.66 
 -15  19   0    1.46    0.76 
 -15  19   0    1.68    0.89 
 -15  19   0    0.90    0.59 
  16 -19   0    5.42    1.02 
 -16 -19   0    8.72    1.31 
 -16 -19   0    5.77    0.83 
  16 -19   0    6.66    1.25 
 -16  19   0    7.90    1.41 
 -16  19   0    5.80    1.08 
 -16  19   0    6.61    1.43 
   0 -20   0   67.43    2.40 
   0 -20   0   64.30    2.34 
   0  20   0   61.81    2.22 
   0  20   0   62.75    2.37 
   0  20   0   67.88    2.40 
   0  20   0   62.76    2.36 
  -1 -20   0    0.91    0.26 
   1 -20   0    1.36    0.33 
  -1 -20   0    1.05    0.28 
   1 -20   0    0.90    0.28 
  -1  20   0    1.03    0.31 
   1  20   0    1.32    0.26 
   1  20   0    1.73    0.33 
  -1  20   0    1.01    0.27 
  -1  20   0    1.45    0.37 
   1  20   0    0.76    0.27 
  -1  20   0    1.24    0.32 
  -1  20   0    0.92    0.28 
   1  20   0    1.71    0.33 
   2 -20   0   11.12    0.79 
  -2 -20   0   10.53    0.67 
  -2 -20   0   11.67    0.72 
   2 -20   0   12.17    0.75 
  -2  20   0   12.58    0.71 
   2  20   0   10.91    0.69 
   2  20   0   13.36    0.64 
  -2  20   0   11.99    0.82 
  -2  20   0   10.70    0.79 
  -2  20   0   11.23    0.83 
  -2  20   0   11.92    0.82 
   2  20   0   12.33    0.72 
   3 -20   0    0.62    0.27 
   3 -20   0    0.92    0.32 
  -3 -20   0    0.41    0.23 
  -3 -20   0    0.46    0.22 
  -3  20   0    0.43    0.23 
  -3  20   0    0.19    0.25 
  -3  20   0    0.02    0.24 
   3  20   0    0.37    0.23 
   3  20   0    0.07    0.20 
  -3  20   0    0.09    0.22 
  -3  20   0    0.21    0.27 
   3  20   0    0.25    0.16 
  -4 -20   0    3.43    0.45 
  -4 -20   0    3.10    0.40 
   4 -20   0    3.84    0.54 
   4 -20   0    3.66    0.58 
  -4  20   0    3.10    0.56 
  -4  20   0    3.63    0.60 
  -4  20   0    4.11    0.52 
  -4  20   0    4.02    0.61 
   4  20   0    3.21    0.44 
   4  20   0    3.56    0.47 
   4  20   0    3.68    0.39 
  -4  20   0    4.07    0.68 
   5 -20   0    0.52    0.37 
  -5 -20   0    0.31    0.22 
   5 -20   0    0.90    0.34 
  -5 -20   0    0.86    0.25 
  -5  20   0    0.21    0.29 
   5  20   0    0.66    0.25 
   5  20   0    0.38    0.24 
   5  20   0    0.49    0.22 
  -5  20   0    0.61    0.35 
  -5  20   0    0.53    0.40 
  -5  20   0    1.02    0.34 
  -5  20   0    0.07    0.32 
   6 -20   0    0.19    0.31 
  -6 -20   0    0.30    0.20 
  -6 -20   0    0.43    0.25 
   6  20   0    0.39    0.26 
  -6  20   0    0.27    0.38 
   6  20   0    0.34    0.26 
  -6  20   0    0.93    0.40 
  -6  20   0    0.68    0.35 
  -6  20   0    0.54    0.37 
  -6  20   0    0.66    0.39 
   6  20   0    0.68    0.25 
  -7 -20   0   12.39    0.78 
   7 -20   0   12.02    0.94 
  -7 -20   0   10.23    0.64 
  -7  20   0   11.82    0.90 
  -7  20   0   11.20    1.19 
  -7  20   0   10.66    1.30 
   7  20   0   11.69    0.77 
  -7  20   0   12.38    1.28 
  -7  20   0   12.27    1.24 
   8 -20   0    0.13    0.35 
  -8 -20   0    0.26    0.20 
  -8 -20   0    0.50    0.27 
  -8  20   0    0.61    0.37 
  -8  20   0    1.01    0.53 
  -8  20   0    0.03    0.41 
  -8  20   0    0.56    0.50 
  -8  20   0    0.11    0.40 
   8  20   0    0.63    0.30 
   8  20   0    0.68    0.31 
   9 -20   0    0.47    0.39 
  -9 -20   0    0.15    0.27 
  -9  20   0    0.02    0.45 
  -9  20   0    0.10    0.34 
  -9  20   0    0.25    0.51 
   9  20   0    0.14    0.27 
   9  20   0    0.12    0.27 
  -9  20   0   -0.24    0.43 
  -9  20   0   -0.10    0.41 
  10 -20   0    0.99    0.47 
 -10 -20   0    0.97    0.35 
 -10  20   0    0.68    0.46 
 -10  20   0    1.62    0.64 
  10  20   0    1.17    0.41 
 -10  20   0    1.63    0.64 
 -10  20   0    1.18    0.64 
  10  20   0    0.81    0.36 
 -10  20   0    1.83    0.66 
  11 -20   0    2.94    0.69 
 -11 -20   0    3.52    0.55 
 -11  20   0    4.16    0.87 
  11  20   0    3.21    0.57 
  11  20   0    2.13    0.50 
 -11  20   0    2.68    0.66 
 -11  20   0    2.21    0.67 
 -11  20   0    2.90    0.80 
 -11  20   0    2.96    0.89 
 -12 -20   0   12.68    0.90 
  12 -20   0   13.12    1.40 
 -12  20   0   14.18    1.48 
 -12  20   0   12.13    1.52 
 -12  20   0   11.85    1.33 
 -12  20   0    9.49    1.27 
 -12  20   0   13.27    1.81 
  13 -20   0    0.07    0.52 
 -13 -20   0    0.02    0.27 
 -13  20   0    0.69    0.67 
 -13  20   0   -0.66    0.46 
 -13  20   0   -0.14    0.40 
 -13  20   0    1.18    0.63 
 -14 -20   0    8.53    0.87 
  14 -20   0    8.12    1.24 
 -14  20   0   13.02    1.45 
 -14  20   0    9.63    1.48 
 -14  20   0   14.06    2.00 
 -15 -20   0    2.85    0.55 
  15 -20   0    2.16    0.84 
 -15  20   0    3.67    1.00 
 -15  20   0    3.88    1.16 
 -15  20   0    4.67    0.96 
   0 -21   0    0.49    0.24 
   0 -21   0    0.67    0.24 
   0  21   0    0.66    0.27 
   0  21   0    0.27    0.22 
   0  21   0    0.61    0.23 
   0  21   0    0.09    0.17 
   1 -21   0    5.49    0.57 
   1 -21   0    6.45    0.69 
  -1 -21   0    4.18    0.49 
  -1 -21   0    4.30    0.51 
  -1  21   0    5.38    0.52 
   1  21   0    5.52    0.58 
   1  21   0    5.07    0.42 
  -1  21   0    4.56    0.60 
  -1  21   0    4.21    0.55 
   1  21   0    5.32    0.56 
  -1  21   0    5.60    0.65 
  -1  21   0    6.55    0.70 
  -2 -21   0   -0.09    0.20 
  -2 -21   0    0.32    0.21 
   2 -21   0    0.76    0.27 
   2 -21   0    0.17    0.24 
   2  21   0    0.32    0.21 
  -2  21   0    0.46    0.25 
  -2  21   0    0.20    0.23 
  -2  21   0   -0.05    0.23 
  -2  21   0    0.39    0.22 
  -2  21   0    0.37    0.25 
   2  21   0    0.13    0.21 
   2  21   0    0.23    0.17 
  -3 -21   0    1.77    0.32 
   3 -21   0    1.77    0.38 
  -3 -21   0    1.44    0.32 
   3 -21   0    1.40    0.41 
   3  21   0    1.59    0.33 
  -3  21   0    1.67    0.46 
  -3  21   0    1.51    0.34 
  -3  21   0    1.61    0.43 
   3  21   0    1.61    0.27 
   3  21   0    1.94    0.35 
  -3  21   0    1.28    0.38 
  -3  21   0    1.24    0.37 
   4 -21   0   18.36    1.06 
  -4 -21   0   21.24    0.96 
   4 -21   0   19.97    1.19 
  -4 -21   0   20.96    1.01 
  -4  21   0   20.00    1.21 
   4  21   0   17.47    0.95 
  -4  21   0   18.00    1.01 
  -4  21   0   16.80    1.15 
  -4  21   0   19.13    1.29 
   4  21   0   19.60    0.88 
  -4  21   0   18.37    1.19 
   4  21   0   19.38    0.99 
  -5 -21   0    0.21    0.21 
   5 -21   0    0.41    0.29 
  -5 -21   0    0.47    0.25 
  -5  21   0    0.51    0.39 
  -5  21   0   -0.12    0.31 
  -5  21   0    0.31    0.28 
   5  21   0    0.23    0.21 
   5  21   0    0.62    0.26 
  -5  21   0    0.21    0.33 
  -5  21   0   -0.23    0.32 
   5  21   0    0.71    0.22 
  -6 -21   0   16.76    0.95 
   6 -21   0   17.86    1.14 
  -6 -21   0   17.79    0.88 
  -6  21   0   19.62    1.28 
   6  21   0   17.10    0.97 
  -6  21   0   15.85    1.04 
   6  21   0   19.11    0.91 
  -6  21   0   16.50    1.24 
  -6  21   0   18.09    1.28 
   6  21   0   18.34    0.97 
  -6  21   0   18.12    1.38 
  -7 -21   0    0.24    0.24 
   7 -21   0    0.28    0.36 
  -7 -21   0    0.46    0.23 
   7  21   0    0.48    0.26 
   7  21   0    0.64    0.29 
   7  21   0    0.56    0.29 
  -7  21   0    0.49    0.42 
  -7  21   0    0.13    0.39 
  -7  21   0   -0.20    0.35 
  -7  21   0    0.51    0.35 
  -7  21   0   -0.12    0.31 
  -8 -21   0   12.85    0.83 
   8 -21   0   12.22    1.16 
  -8 -21   0   11.18    0.67 
  -8  21   0   13.84    1.41 
   8  21   0   12.86    0.85 
  -8  21   0   13.47    1.43 
  -8  21   0   11.71    0.96 
   8  21   0   11.31    0.81 
  -8  21   0   12.04    1.46 
  -8  21   0   13.20    1.33 
  -9 -21   0    3.64    0.54 
   9 -21   0    4.08    0.75 
   9  21   0    3.69    0.57 
  -9  21   0    4.40    0.85 
  -9  21   0    4.94    0.78 
  -9  21   0    4.42    0.96 
  -9  21   0    3.69    0.78 
   9  21   0    3.49    0.54 
  -9  21   0    2.79    0.74 
 -10 -21   0   12.57    0.86 
  10 -21   0   11.72    1.23 
 -10  21   0   10.40    1.17 
 -10  21   0   10.59    1.28 
 -10  21   0   12.32    1.61 
  10  21   0   12.46    0.90 
 -10  21   0   13.24    1.45 
 -10  21   0   10.98    1.35 
  10  21   0   10.92    0.85 
 -11 -21   0   -0.07    0.25 
  11 -21   0    0.53    0.48 
  11  21   0   -0.06    0.29 
 -11  21   0   -0.31    0.43 
 -11  21   0    0.53    0.51 
  11  21   0    0.29    0.29 
 -11  21   0   -0.25    0.41 
 -11  21   0    0.27    0.67 
 -11  21   0    0.22    0.42 
 -12 -21   0    0.81    0.35 
  12 -21   0    1.34    0.59 
 -12  21   0    0.46    0.48 
 -12  21   0    1.33    0.57 
 -12  21   0    0.52    0.65 
 -12  21   0    1.58    0.64 
 -12  21   0    1.05    0.67 
  13 -21   0    2.49    0.75 
 -13 -21   0    1.03    0.39 
 -13  21   0    1.39    0.60 
 -13  21   0    2.05    0.79 
 -13  21   0    1.19    0.66 
 -13  21   0    2.28    0.92 
  14 -21   0    0.22    0.63 
 -14 -21   0    0.30    0.33 
 -14  21   0   -0.17    0.41 
 -14  21   0   -0.55    0.48 
 -14  21   0   -0.21    0.58 
  15 -21   0   -0.17    0.55 
 -15 -21   0    0.27    0.31 
 -15  21   0    0.14    0.68 
 -15  21   0    1.04    0.84 
   0 -22   0   32.11    1.40 
   0 -22   0   32.17    1.46 
   0  22   0   30.87    1.43 
   0  22   0   32.18    1.30 
   0  22   0   30.94    1.43 
  -1 -22   0    2.00    0.38 
   1 -22   0    1.59    0.36 
   1 -22   0    2.86    0.49 
  -1 -22   0    1.87    0.37 
   1  22   0    2.43    0.40 
   1  22   0    1.90    0.37 
  -1  22   0    1.85    0.44 
  -1  22   0    2.60    0.46 
   1  22   0    2.17    0.33 
  -1  22   0    2.04    0.36 
  -1  22   0    2.68    0.48 
  -1  22   0    3.00    0.51 
   2 -22   0   52.32    2.08 
   2 -22   0   53.04    2.17 
  -2 -22   0   54.26    2.01 
  -2 -22   0   52.94    2.04 
  -2  22   0   52.07    1.99 
  -2  22   0   52.90    2.19 
  -2  22   0   52.70    2.19 
  -2  22   0   50.68    2.23 
  -2  22   0   51.36    2.16 
   2  22   0   52.29    1.88 
   2  22   0   52.31    2.03 
   2  22   0   51.50    2.01 
   3 -22   0    1.46    0.37 
   3 -22   0    2.10    0.45 
  -3 -22   0    1.61    0.33 
  -3 -22   0    1.36    0.34 
  -3  22   0    0.90    0.36 
  -3  22   0    1.34    0.39 
   3  22   0    2.01    0.38 
  -3  22   0    0.90    0.40 
  -3  22   0    1.24    0.38 
   3  22   0    0.71    0.26 
   3  22   0    1.56    0.29 
  -4 -22   0    2.93    0.42 
   4 -22   0    2.66    0.54 
  -4 -22   0    2.03    0.38 
   4 -22   0    1.88    0.43 
   4  22   0    1.99    0.38 
  -4  22   0    2.54    0.46 
  -4  22   0    3.38    0.63 
   4  22   0    2.42    0.41 
  -4  22   0    2.85    0.61 
  -4  22   0    3.48    0.62 
   4  22   0    3.08    0.38 
  -4  22   0    2.69    0.56 
  -5 -22   0    0.24    0.20 
  -5 -22   0    0.32    0.23 
   5 -22   0    0.07    0.30 
  -5  22   0    0.07    0.26 
  -5  22   0    0.25    0.36 
  -5  22   0    0.00    0.34 
   5  22   0    0.26    0.20 
   5  22   0    0.04    0.22 
  -5  22   0   -0.07    0.31 
   5  22   0    0.01    0.20 
  -5  22   0   -0.17    0.32 
  -6 -22   0    3.71    0.51 
  -6 -22   0    4.65    0.50 
   6 -22   0    4.48    0.66 
   6  22   0    5.30    0.59 
  -6  22   0    4.33    0.77 
  -6  22   0    3.49    0.77 
   6  22   0    5.86    0.55 
  -6  22   0    3.40    0.71 
   6  22   0    4.75    0.57 
  -6  22   0    5.14    0.82 
  -6  22   0    4.78    0.66 
  -7 -22   0    1.89    0.39 
  -7 -22   0    1.60    0.31 
   7 -22   0    0.96    0.44 
  -7  22   0    1.54    0.46 
   7  22   0    1.92    0.35 
   7  22   0    1.42    0.37 
  -7  22   0    1.24    0.53 
  -7  22   0    2.12    0.63 
  -7  22   0    1.41    0.55 
  -7  22   0    2.60    0.72 
   7  22   0    1.84    0.38 
  -8 -22   0    3.18    0.48 
   8 -22   0    4.78    0.75 
  -8  22   0    5.00    0.91 
  -8  22   0    3.94    0.82 
   8  22   0    3.43    0.50 
  -8  22   0    3.73    0.67 
   8  22   0    3.01    0.52 
   8  22   0    3.87    0.52 
  -8  22   0    4.84    0.97 
  -8  22   0    3.73    0.77 
   9 -22   0    0.96    0.48 
  -9 -22   0    1.20    0.36 
  -9  22   0    1.23    0.68 
  -9  22   0    1.47    0.64 
   9  22   0    1.00    0.37 
  -9  22   0    0.68    0.51 
  -9  22   0    2.13    0.71 
  -9  22   0    1.41    0.50 
   9  22   0    0.90    0.36 
 -10 -22   0    0.07    0.24 
  10 -22   0   -0.12    0.38 
  10  22   0    0.40    0.32 
 -10  22   0   -0.51    0.39 
 -10  22   0    0.23    0.46 
 -10  22   0    0.06    0.36 
  10  22   0   -0.08    0.26 
 -10  22   0    0.31    0.53 
 -10  22   0    0.32    0.55 
  11 -22   0    2.08    0.67 
 -11 -22   0    2.44    0.46 
  11  22   0    2.55    0.54 
 -11  22   0    2.12    0.86 
 -11  22   0    3.01    0.82 
 -11  22   0    3.28    0.87 
  11  22   0    2.99    0.56 
 -11  22   0    3.25    0.72 
 -11  22   0    2.18    0.81 
  12 -22   0    4.95    0.92 
 -12 -22   0    3.54    0.55 
 -12  22   0    2.13    0.77 
 -12  22   0    2.53    0.78 
 -12  22   0    1.88    0.89 
 -12  22   0    4.00    0.82 
 -12  22   0    3.72    0.89 
  13 -22   0   -0.20    0.42 
 -13 -22   0    0.97    0.36 
 -13  22   0    1.48    0.84 
 -13  22   0    2.05    0.79 
 -13  22   0    0.85    0.72 
  14 -22   0    2.14    0.82 
 -14 -22   0    3.59    0.60 
 -14  22   0    3.42    1.15 
 -14  22   0    3.66    1.08 
 -15 -22   0    0.31    0.32 
 -15  22   0    0.13    0.70 
 -15  22   0    0.51    0.74 
   0 -23   0    0.43    0.28 
   0 -23   0    0.28    0.22 
   0  23   0    0.54    0.23 
   0  23   0    0.59    0.30 
   0  23   0    0.26    0.24 
  -1 -23   0    6.04    0.65 
  -1 -23   0    7.47    0.69 
   1 -23   0    5.61    0.63 
   1 -23   0    6.20    0.70 
   1  23   0    5.80    0.65 
  -1  23   0    7.00    0.76 
   1  23   0    6.88    0.68 
  -1  23   0    6.50    0.53 
   1  23   0    5.50    0.47 
  -1  23   0    7.47    0.79 
  -1  23   0    6.54    0.73 
   2 -23   0    7.87    0.84 
   2 -23   0    8.27    0.66 
  -2 -23   0    7.45    0.57 
  -2 -23   0    8.02    0.64 
   2  23   0    5.28    0.60 
   2  23   0    6.32    0.49 
  -2  23   0    6.86    0.56 
  -2  23   0    6.68    0.77 
  -2  23   0    6.62    0.78 
  -2  23   0    6.36    0.78 
   2  23   0    7.27    0.58 
  -3 -23   0    3.34    0.44 
  -3 -23   0    2.16    0.39 
   3 -23   0    2.96    0.57 
   3 -23   0    2.75    0.50 
  -3  23   0    2.79    0.61 
  -3  23   0    2.51    0.55 
  -3  23   0    4.45    0.57 
   3  23   0    2.65    0.36 
   3  23   0    2.56    0.45 
  -3  23   0    2.70    0.58 
   3  23   0    2.02    0.37 
  -3  23   0    2.45    0.53 
  -4 -23   0    7.54    0.59 
   4 -23   0    8.00    0.83 
  -4 -23   0    5.85    0.61 
  -4  23   0    4.95    0.82 
  -4  23   0    8.45    0.95 
   4  23   0    8.17    0.76 
  -4  23   0    7.22    0.87 
  -4  23   0    7.52    0.74 
   4  23   0    6.13    0.64 
  -4  23   0    8.53    0.96 
   4  23   0    6.87    0.51 
  -5 -23   0    0.55    0.24 
   5 -23   0    0.86    0.36 
  -5 -23   0    0.44    0.26 
  -5  23   0    0.38    0.35 
  -5  23   0    0.94    0.34 
   5  23   0    0.29    0.25 
  -5  23   0    0.77    0.44 
   5  23   0    0.95    0.30 
   5  23   0    0.53    0.23 
  -5  23   0    0.93    0.47 
  -5  23   0    0.84    0.42 
  -6 -23   0    8.96    0.63 
   6 -23   0    8.43    0.93 
  -6 -23   0    9.89    0.71 
  -6  23   0   10.51    1.17 
   6  23   0    8.80    0.62 
   6  23   0    9.06    0.70 
  -6  23   0    8.19    1.14 
  -6  23   0    9.15    1.09 
  -6  23   0    9.60    1.13 
   6  23   0    9.22    0.69 
  -6  23   0   10.26    0.97 
  -7 -23   0    0.20    0.24 
   7 -23   0    0.06    0.30 
  -7 -23   0    0.27    0.21 
  -7  23   0   -0.23    0.36 
  -7  23   0   -0.06    0.39 
   7  23   0    0.03    0.21 
  -7  23   0    0.03    0.35 
  -7  23   0   -0.06    0.29 
   7  23   0    0.14    0.25 
   7  23   0    0.06    0.25 
  -7  23   0   -0.25    0.37 
   8 -23   0   38.20    2.00 
  -8 -23   0   39.26    1.71 
  -8  23   0   36.20    2.15 
  -8  23   0   35.70    2.32 
  -8  23   0   36.36    2.14 
  -8  23   0   40.24    1.95 
  -8  23   0   39.33    2.21 
   8  23   0   40.43    1.67 
   8  23   0   43.28    1.78 
   8  23   0   41.47    1.79 
   9 -23   0    0.73    0.48 
  -9 -23   0    0.83    0.34 
  -9  23   0    0.30    0.40 
   9  23   0    0.57    0.33 
  -9  23   0    0.76    0.59 
   9  23   0    0.61    0.33 
  -9  23   0    0.50    0.51 
  -9  23   0    1.37    0.59 
   9  23   0    0.70    0.36 
  -9  23   0    1.25    0.69 
 -10 -23   0    3.80    0.56 
  10 -23   0    4.31    0.79 
 -10  23   0    4.68    0.97 
  10  23   0    4.07    0.60 
 -10  23   0    4.45    0.96 
 -10  23   0    2.51    0.95 
  10  23   0    4.58    0.66 
 -10  23   0    3.89    0.86 
  11 -23   0    2.74    0.73 
 -11 -23   0    4.02    0.57 
  11  23   0    3.75    0.60 
  11  23   0    3.36    0.67 
 -11  23   0    5.20    1.02 
 -11  23   0    2.85    1.04 
 -11  23   0    3.37    0.85 
 -11  23   0    4.54    1.04 
 -12 -23   0   -0.01    0.28 
  12 -23   0   -0.23    0.47 
 -12  23   0   -0.20    0.50 
 -12  23   0    0.19    0.54 
 -12  23   0   -0.60    0.43 
 -12  23   0   -0.60    0.41 
  13 -23   0    0.51    0.56 
 -13 -23   0    0.00    0.28 
 -13  23   0    0.27    0.55 
 -13  23   0    0.39    0.69 
 -13  23   0   -0.11    0.55 
 -14 -23   0    3.89    0.61 
  14 -23   0    3.09    0.92 
 -14  23   0    5.43    1.30 
 -14  23   0    3.05    1.11 
   0 -24   0   31.87    1.45 
   0 -24   0   32.51    1.53 
   0  24   0   31.65    1.35 
   0  24   0   32.96    1.53 
   0  24   0   32.15    1.51 
  -1 -24   0    4.94    0.61 
  -1 -24   0    5.59    0.61 
   1 -24   0    5.47    0.63 
   1 -24   0    5.33    0.67 
   1  24   0    5.56    0.47 
  -1  24   0    5.10    0.66 
  -1  24   0    6.00    0.77 
   1  24   0    5.79    0.64 
  -1  24   0    6.55    0.62 
  -1  24   0    4.92    0.66 
   1  24   0    5.49    0.66 
   2 -24   0   26.48    1.41 
   2 -24   0   24.80    1.29 
  -2 -24   0   24.72    1.25 
  -2 -24   0   24.24    1.21 
  -2  24   0   25.54    1.39 
   2  24   0   26.01    1.27 
  -2  24   0   28.11    1.50 
   2  24   0   25.56    1.26 
  -2  24   0   26.07    1.22 
  -2  24   0   24.20    1.37 
   2  24   0   29.39    1.17 
   3 -24   0    3.23    0.58 
   3 -24   0    2.74    0.49 
  -3 -24   0    3.88    0.52 
  -3 -24   0    3.67    0.49 
   3  24   0    3.39    0.41 
  -3  24   0    2.49    0.56 
  -3  24   0    2.26    0.54 
  -3  24   0    4.40    0.55 
   3  24   0    2.56    0.43 
   3  24   0    4.07    0.55 
  -3  24   0    3.33    0.64 
   4 -24   0    1.15    0.39 
  -4 -24   0    0.76    0.30 
  -4 -24   0    1.01    0.29 
  -4  24   0    0.65    0.41 
  -4  24   0    0.67    0.41 
   4  24   0    0.60    0.28 
   4  24   0    0.52    0.28 
   4  24   0    0.26    0.21 
  -4  24   0    0.74    0.44 
  -4  24   0    0.41    0.30 
  -4  24   0    1.48    0.45 
  -5 -24   0    3.81    0.54 
   5 -24   0    2.74    0.54 
  -5 -24   0    2.66    0.42 
   5  24   0    3.45    0.54 
  -5  24   0    2.80    0.65 
  -5  24   0    3.51    0.72 
   5  24   0    2.94    0.41 
   5  24   0    3.21    0.48 
  -5  24   0    3.17    0.55 
  -5  24   0    2.04    0.64 
  -5  24   0    2.49    0.65 
   6 -24   0   -0.11    0.27 
  -6 -24   0    0.08    0.25 
  -6 -24   0    0.22    0.21 
   6  24   0    0.34    0.29 
  -6  24   0    0.05    0.38 
   6  24   0    0.19    0.25 
   6  24   0    0.04    0.21 
  -6  24   0   -0.15    0.30 
  -6  24   0    0.40    0.38 
  -6  24   0    0.49    0.51 
  -7 -24   0   21.67    1.04 
   7 -24   0   18.33    1.31 
  -7 -24   0   21.43    1.14 
  -7  24   0   24.08    1.60 
   7  24   0   20.45    1.12 
  -7  24   0   22.38    1.56 
  -7  24   0   19.67    1.61 
   7  24   0   20.20    1.15 
  -7  24   0   23.03    1.58 
   7  24   0   22.38    1.08 
  -8 -24   0    8.37    0.80 
   8 -24   0    6.81    0.92 
  -8  24   0   10.20    1.31 
   8  24   0    8.34    0.83 
   8  24   0    8.58    0.82 
  -8  24   0    7.32    1.24 
  -8  24   0   10.58    1.30 
  -8  24   0   10.08    1.24 
   8  24   0    8.92    0.69 
   9 -24   0    4.38    0.80 
  -9 -24   0    4.32    0.59 
  -9  24   0    4.76    0.95 
   9  24   0    4.91    0.65 
   9  24   0    4.70    0.66 
  -9  24   0    5.01    0.95 
  -9  24   0    4.29    1.03 
  -9  24   0    4.06    0.90 
   9  24   0    4.37    0.58 
 -10 -24   0   -0.11    0.25 
  10 -24   0    0.14    0.38 
  10  24   0    0.10    0.30 
 -10  24   0    0.23    0.51 
  10  24   0   -0.40    0.24 
  10  24   0    0.26    0.31 
 -10  24   0   -0.47    0.40 
 -10  24   0    0.17    0.47 
 -10  24   0    0.68    0.72 
 -11 -24   0   -0.37    0.25 
  11 -24   0    0.32    0.47 
 -11  24   0   -0.54    0.50 
 -11  24   0   -0.15    0.48 
  11  24   0   -0.37    0.26 
 -11  24   0   -0.12    0.55 
 -11  24   0   -0.35    0.46 
 -12 -24   0    3.18    0.57 
  12 -24   0    4.06    0.92 
 -12  24   0    3.06    1.04 
 -12  24   0    4.31    1.08 
 -12  24   0    3.05    0.83 
 -12  24   0    2.62    0.83 
 -13 -24   0    0.01    0.31 
  13 -24   0    0.53    0.58 
 -13  24   0    0.31    0.64 
 -13  24   0   -1.00    0.48 
 -13  24   0    0.31    0.61 
  14 -24   0    4.31    0.96 
 -14 -24   0    5.02    0.67 
 -14  24   0    4.98    1.17 
 -14  24   0    3.62    1.17 
   0 -25   0    0.45    0.31 
   0 -25   0    0.21    0.26 
   0  25   0    0.19    0.23 
   0  25   0    0.30    0.20 
   0  25   0    0.35    0.27 
   1 -25   0    0.09    0.28 
  -1 -25   0   -0.05    0.22 
   1 -25   0   -0.18    0.23 
  -1 -25   0    0.62    0.31 
   1  25   0   -0.14    0.23 
  -1  25   0   -0.16    0.27 
  -1  25   0   -0.05    0.22 
   1  25   0    0.11    0.17 
   1  25   0    0.51    0.27 
  -1  25   0    0.22    0.26 
   2 -25   0   13.46    0.93 
   2 -25   0   14.83    1.03 
  -2 -25   0   15.22    0.88 
  -2 -25   0   14.35    0.91 
  -2  25   0   10.57    1.04 
  -2  25   0   13.46    0.98 
   2  25   0   13.16    0.75 
  -2  25   0   13.30    1.04 
   2  25   0   13.69    0.87 
   2  25   0   14.03    0.89 
   3 -25   0    8.89    0.88 
  -3 -25   0   13.10    0.84 
  -3 -25   0   10.80    0.74 
   3 -25   0   11.34    1.08 
   3  25   0   10.39    0.77 
  -3  25   0   10.78    1.15 
  -3  25   0    9.62    1.03 
  -3  25   0    9.99    1.04 
   3  25   0   11.98    0.68 
   3  25   0   10.96    0.76 
  -4 -25   0   48.31    1.87 
   4 -25   0   46.14    2.06 
  -4 -25   0   46.96    1.93 
   4  25   0   46.94    1.75 
  -4  25   0   42.29    2.27 
   4  25   0   48.43    1.94 
  -4  25   0   45.69    2.22 
  -4  25   0   43.17    2.19 
   4  25   0   45.25    1.90 
  -5 -25   0    0.40    0.28 
   5 -25   0    0.79    0.40 
  -5 -25   0   -0.01    0.22 
  -5  25   0    0.05    0.37 
  -5  25   0    0.01    0.40 
   5  25   0    0.08    0.25 
   5  25   0    0.28    0.27 
  -5  25   0   -0.53    0.36 
  -6 -25   0   20.79    1.01 
  -6 -25   0   17.48    1.05 
   6 -25   0   17.23    1.22 
  -6  25   0   20.52    1.46 
   6  25   0   19.52    0.97 
  -6  25   0   16.42    1.58 
   6  25   0   17.33    1.04 
  -6  25   0   17.13    1.70 
   6  25   0   18.79    1.07 
   7 -25   0    1.16    0.44 
  -7 -25   0    1.62    0.35 
  -7 -25   0    1.71    0.40 
  -7  25   0    1.26    0.60 
  -7  25   0    1.42    0.63 
   7  25   0    1.81    0.40 
  -7  25   0    1.86    0.69 
  -7  25   0    0.98    0.59 
   7  25   0    1.59    0.36 
   7  25   0    1.68    0.42 
   8 -25   0   10.77    1.17 
  -8 -25   0   12.72    0.89 
   8  25   0   12.14    0.87 
   8  25   0   12.12    0.90 
  -8  25   0   11.87    1.39 
  -8  25   0    9.98    1.40 
   8  25   0   12.98    0.83 
  -8  25   0   12.60    1.45 
  -8  25   0   12.36    1.44 
   9 -25   0    0.99    0.54 
  -9 -25   0    1.74    0.42 
  -9  25   0    0.97    0.69 
   9  25   0    1.49    0.43 
   9  25   0    1.08    0.37 
  -9  25   0    2.80    0.80 
  -9  25   0    2.83    0.81 
   9  25   0    1.49    0.43 
  -9  25   0    1.91    0.69 
  10 -25   0    1.08    0.52 
 -10 -25   0    2.02    0.46 
  10  25   0    1.75    0.47 
 -10  25   0    2.72    0.79 
 -10  25   0    1.30    0.72 
 -10  25   0    1.94    0.86 
  10  25   0    1.79    0.44 
  10  25   0    1.41    0.42 
 -10  25   0    1.72    0.69 
 -11 -25   0    1.50    0.43 
  11 -25   0    1.75    0.67 
 -11  25   0    2.32    0.76 
  11  25   0    2.57    0.55 
  11  25   0    2.09    0.48 
 -11  25   0    2.04    0.89 
 -11  25   0    1.40    0.71 
 -11  25   0    0.78    0.63 
 -12 -25   0    0.44    0.31 
  12 -25   0    0.36    0.56 
  12  25   0    0.09    0.33 
 -12  25   0    0.90    0.61 
 -12  25   0    0.23    0.56 
 -12  25   0    1.06    0.88 
 -12  25   0   -0.81    0.49 
  13 -25   0    1.10    0.59 
 -13 -25   0    1.00    0.38 
 -13  25   0    0.52    0.65 
 -13  25   0    0.49    0.66 
 -13  25   0    1.84    0.95 
 -14 -25   0    1.71    0.46 
 -14  25   0    2.89    1.07 
 -14  25   0    0.56    0.71 
   0 -26   0   17.82    1.11 
   0 -26   0   19.46    1.10 
   0  26   0   18.00    1.11 
   0  26   0   18.55    1.12 
   1 -26   0    0.37    0.28 
  -1 -26   0    0.08    0.26 
  -1 -26   0    0.36    0.30 
   1 -26   0    0.20    0.32 
  -1  26   0    0.15    0.29 
  -1  26   0   -0.33    0.19 
  -1  26   0    0.57    0.34 
   1  26   0    0.10    0.26 
   1  26   0    0.43    0.28 
   2 -26   0   10.14    0.81 
  -2 -26   0   10.41    0.81 
   2 -26   0   11.36    1.09 
  -2 -26   0   10.41    0.75 
   2  26   0   10.19    0.78 
  -2  26   0    9.97    1.09 
  -2  26   0    9.36    0.97 
   2  26   0   10.58    0.79 
  -2  26   0   11.90    0.93 
  -3 -26   0   10.64    0.80 
  -3 -26   0    9.98    0.73 
   3 -26   0    9.15    0.90 
   3  26   0    9.76    0.75 
   3  26   0    9.81    0.73 
  -3  26   0    8.10    0.97 
  -3  26   0    9.07    1.02 
  -3  26   0    9.58    1.09 
  -4 -26   0    9.92    0.78 
  -4 -26   0    8.84    0.68 
   4 -26   0    9.97    0.99 
   4  26   0    8.47    0.80 
   4  26   0    9.18    0.64 
  -4  26   0    9.17    1.08 
   4  26   0    8.77    0.84 
  -4  26   0   10.88    1.25 
  -4  26   0   10.91    1.16 
  -5 -26   0   20.67    1.07 
   5 -26   0   19.60    1.29 
  -5 -26   0   20.51    1.15 
  -5  26   0   21.13    1.47 
   5  26   0   21.00    1.17 
  -5  26   0   22.98    1.61 
   5  26   0   20.25    1.13 
   5  26   0   19.95    0.99 
  -5  26   0   18.20    1.40 
  -6 -26   0    2.15    0.41 
   6 -26   0    2.00    0.55 
  -6 -26   0    1.96    0.44 
   6  26   0    1.81    0.36 
  -6  26   0    2.49    0.66 
  -6  26   0    1.84    0.62 
  -6  26   0    1.85    0.72 
   6  26   0    2.44    0.47 
   6  26   0    2.21    0.46 
   7 -26   0   33.31    1.85 
  -7 -26   0   36.50    1.63 
  -7  26   0   32.06    2.02 
   7  26   0   34.31    1.63 
   7  26   0   34.37    1.48 
  -7  26   0   33.89    2.24 
   7  26   0   34.58    1.60 
  -7  26   0   32.11    2.00 
   8 -26   0    1.57    0.55 
  -8 -26   0    2.06    0.46 
  -8  26   0    2.62    0.75 
  -8  26   0    1.96    0.76 
  -8  26   0    3.09    0.80 
   8  26   0    2.32    0.44 
   8  26   0    1.80    0.45 
   8  26   0    2.06    0.46 
  -9 -26   0    6.79    0.76 
   9 -26   0    6.25    0.95 
  -9  26   0    6.15    1.29 
   9  26   0    6.39    0.78 
   9  26   0    6.15    0.67 
  -9  26   0    5.17    1.02 
  -9  26   0    7.88    1.19 
   9  26   0    5.23    0.70 
 -10 -26   0    0.78    0.34 
  10 -26   0    0.32    0.50 
  10  26   0    0.36    0.35 
 -10  26   0    0.39    0.55 
  10  26   0    0.64    0.39 
 -10  26   0    0.25    0.54 
  10  26   0    0.52    0.35 
 -10  26   0    1.31    0.83 
 -10  26   0    0.28    0.50 
 -11 -26   0   -0.01    0.29 
  11 -26   0   -0.02    0.50 
 -11  26   0   -0.92    0.40 
 -11  26   0   -0.15    0.51 
 -11  26   0    1.10    0.64 
  11  26   0   -0.01    0.26 
 -11  26   0   -0.01    0.51 
 -12 -26   0    1.60    0.45 
  12 -26   0    3.97    0.92 
 -12  26   0    2.15    0.98 
  12  26   0    2.10    0.51 
 -12  26   0    2.04    0.78 
 -12  26   0    2.85    0.92 
 -12  26   0    3.52    0.94 
 -13 -26   0    4.24    0.64 
  13 -26   0    2.14    0.74 
 -13  26   0    4.28    1.28 
 -13  26   0    5.42    1.11 
  13  26   0    4.83    0.73 
 -13  26   0    4.02    1.11 
   0 -27   0    0.25    0.33 
   0 -27   0    0.63    0.33 
   0  27   0    0.24    0.32 
   0  27   0    0.51    0.31 
   1 -27   0   20.26    1.22 
   1 -27   0   19.80    1.14 
  -1 -27   0   19.95    1.17 
  -1 -27   0   18.23    1.07 
   1  27   0   17.24    1.10 
  -1  27   0   17.77    1.21 
   1  27   0   17.45    1.10 
  -1  27   0   19.23    1.21 
  -1  27   0   16.97    1.16 
   2 -27   0   -0.07    0.34 
  -2 -27   0    0.24    0.24 
  -2 -27   0    0.14    0.29 
   2 -27   0    0.50    0.31 
  -2  27   0   -0.09    0.24 
   2  27   0    0.12    0.24 
  -2  27   0    0.25    0.31 
  -2  27   0    0.34    0.35 
   2  27   0    0.08    0.24 
  -3 -27   0    1.91    0.41 
  -3 -27   0    2.31    0.41 
   3 -27   0    2.37    0.52 
  -3  27   0    1.47    0.52 
  -3  27   0    2.70    0.63 
   3  27   0    2.43    0.47 
  -3  27   0    2.06    0.57 
   3  27   0    2.11    0.43 
  -4 -27   0   14.15    0.95 
   4 -27   0   13.28    1.01 
  -4 -27   0   13.23    0.85 
   4  27   0   13.54    0.92 
  -4  27   0   12.73    1.37 
   4  27   0   13.76    0.91 
  -4  27   0   14.91    1.16 
  -4  27   0   11.35    1.21 
   5 -27   0   10.24    1.07 
  -5 -27   0   12.12    0.80 
  -5 -27   0   11.89    0.86 
   5  27   0   11.02    0.83 
  -5  27   0   10.73    1.34 
  -5  27   0   14.77    1.45 
  -5  27   0   10.32    1.21 
   5  27   0   10.84    0.82 
  -6 -27   0   15.24    0.90 
  -6 -27   0   14.25    0.97 
   6 -27   0   14.43    1.13 
  -6  27   0   13.92    1.44 
  -6  27   0   14.05    1.44 
  -6  27   0   16.72    1.73 
   6  27   0   13.15    0.94 
   6  27   0   15.89    1.01 
  -7 -27   0    2.51    0.49 
   7 -27   0    2.21    0.59 
  -7  27   0    2.58    0.78 
  -7  27   0    2.74    0.75 
   7  27   0    3.63    0.59 
   7  27   0    2.13    0.49 
   8 -27   0    3.58    0.74 
  -8 -27   0    4.67    0.65 
   8  27   0    5.02    0.69 
  -8  27   0    4.75    0.95 
  -8  27   0    5.62    1.00 
  -8  27   0    3.26    1.00 
   8  27   0    5.37    0.68 
   9 -27   0    1.44    0.61 
  -9 -27   0    1.36    0.41 
   9  27   0    1.68    0.44 
  -9  27   0    2.98    0.94 
   9  27   0    1.68    0.46 
  -9  27   0    2.25    0.78 
  -9  27   0    1.86    0.78 
   9  27   0    1.50    0.46 
 -10 -27   0    0.33    0.33 
  10 -27   0    0.51    0.50 
  10  27   0    0.54    0.37 
  10  27   0    0.10    0.32 
  10  27   0   -0.08    0.28 
 -10  27   0    0.17    0.55 
 -10  27   0    0.52    0.59 
 -10  27   0    0.69    0.74 
 -11 -27   0    1.28    0.42 
  11 -27   0    2.25    0.70 
 -11  27   0    2.56    0.85 
 -11  27   0    1.16    0.75 
  11  27   0    1.37    0.47 
 -11  27   0    1.24    0.67 
  12 -27   0    0.13    0.57 
 -12 -27   0    1.21    0.40 
 -12  27   0    1.12    0.81 
 -12  27   0    1.08    0.70 
 -12  27   0    1.00    0.68 
 -13 -27   0   -0.27    0.30 
 -13  27   0    0.16    0.79 
 -13  27   0    0.22    0.66 
   0 -28   0    8.60    0.94 
   0 -28   0   10.22    0.93 
   0  28   0   10.44    1.01 
   0  28   0   11.09    1.08 
   0  28   0    9.26    0.94 
   1 -28   0    0.62    0.41 
  -1 -28   0    0.88    0.38 
   1 -28   0   -0.01    0.30 
  -1 -28   0    0.26    0.29 
  -1  28   0    0.35    0.33 
  -1  28   0   -0.02    0.26 
   1  28   0    0.38    0.31 
  -1  28   0    0.75    0.35 
   1  28   0    0.24    0.30 
   2 -28   0    3.99    0.78 
  -2 -28   0    2.65    0.49 
   2 -28   0    3.88    0.62 
  -2 -28   0    3.50    0.59 
  -2  28   0    4.91    0.79 
   2  28   0    3.67    0.57 
   2  28   0    4.53    0.66 
  -2  28   0    2.50    0.56 
  -2  28   0    3.25    0.62 
  -3 -28   0   -0.19    0.21 
   3 -28   0    0.04    0.26 
  -3 -28   0   -0.02    0.28 
  -3  28   0   -0.45    0.26 
  -3  28   0   -0.10    0.32 
  -3  28   0    0.42    0.43 
   3  28   0    0.22    0.28 
   3  28   0    0.15    0.27 
   4 -28   0    4.54    0.69 
  -4 -28   0    5.05    0.61 
  -4 -28   0    6.75    0.75 
  -4  28   0    6.33    1.03 
  -4  28   0    3.76    0.77 
   4  28   0    5.61    0.69 
   4  28   0    5.18    0.66 
  -4  28   0    5.51    0.90 
   5 -28   0   11.48    1.16 
  -5 -28   0   14.38    0.96 
  -5 -28   0   12.35    0.84 
   5  28   0   11.10    0.86 
  -5  28   0   10.74    1.26 
   5  28   0   11.89    0.89 
  -5  28   0   14.87    1.47 
  -5  28   0   12.78    1.47 
  -6 -28   0    2.16    0.49 
   6 -28   0    0.23    0.38 
  -6 -28   0    1.10    0.33 
  -6  28   0    1.54    0.59 
   6  28   0    1.31    0.42 
  -6  28   0    0.85    0.49 
  -6  28   0    1.00    0.58 
   6  28   0    1.40    0.43 
   7 -28   0   40.72    2.08 
  -7 -28   0   37.34    1.73 
   7  28   0   38.02    1.73 
  -7  28   0   31.40    2.10 
   7  28   0   36.22    1.74 
  -7  28   0   37.12    2.23 
  -7  28   0   31.52    2.25 
  -8 -28   0   -0.18    0.27 
   8 -28   0    0.41    0.47 
  -8  28   0    0.20    0.51 
  -8  28   0   -0.54    0.45 
   8  28   0   -0.07    0.26 
  -8  28   0   -0.38    0.47 
   8  28   0   -0.01    0.32 
   9 -28   0    5.29    0.92 
  -9 -28   0    5.15    0.68 
   9  28   0    4.88    0.70 
  -9  28   0    5.82    1.08 
  -9  28   0    2.68    0.93 
   9  28   0    5.77    0.77 
  -9  28   0    6.82    1.16 
 -10 -28   0    7.26    0.79 
  10 -28   0    8.14    1.14 
 -10  28   0    6.26    1.19 
 -10  28   0    6.25    1.13 
  10  28   0    8.00    0.90 
  10  28   0    7.23    0.82 
 -10  28   0    7.83    1.42 
  11 -28   0    0.08    0.50 
 -11 -28   0   -0.14    0.27 
 -11  28   0   -0.57    0.56 
 -11  28   0   -0.41    0.61 
 -11  28   0    0.46    0.64 
  12 -28   0    0.53    0.66 
 -12 -28   0    0.83    0.41 
 -12  28   0    1.00    0.72 
 -12  28   0    0.77    0.87 
 -12  28   0    0.85    0.71 
   0 -29   0    0.20    0.30 
   0 -29   0    0.14    0.34 
   0  29   0    0.18    0.31 
   0  29   0    0.37    0.34 
   0  29   0    0.34    0.31 
  -1 -29   0    7.94    0.86 
  -1 -29   0    8.12    0.85 
   1 -29   0    8.20    0.95 
   1 -29   0    6.56    0.80 
  -1  29   0    7.55    0.98 
  -1  29   0    8.09    0.96 
  -1  29   0    7.23    0.90 
   1  29   0   10.77    1.01 
   1  29   0    7.37    0.85 
   2 -29   0    0.41    0.36 
  -2 -29   0   -0.06    0.29 
  -2 -29   0    0.59    0.34 
   2  29   0    0.34    0.30 
  -2  29   0   -0.08    0.28 
  -2  29   0    0.57    0.40 
   2  29   0    0.01    0.27 
  -2  29   0    0.16    0.31 
  -3 -29   0    9.11    0.92 
  -3 -29   0   10.37    0.79 
   3 -29   0    7.86    0.91 
  -3  29   0    7.35    0.98 
   3  29   0    9.78    0.92 
   3  29   0    9.99    0.93 
  -3  29   0    7.21    1.02 
  -3  29   0    9.17    1.06 
  -4 -29   0    0.84    0.36 
  -4 -29   0    1.20    0.41 
   4 -29   0    1.20    0.48 
  -4  29   0    2.08    0.63 
  -4  29   0    1.21    0.49 
   4  29   0    1.39    0.38 
  -4  29   0    1.69    0.56 
   4  29   0    1.53    0.42 
  -5 -29   0    1.59    0.44 
   5 -29   0    2.03    0.55 
  -5 -29   0    1.07    0.35 
  -5  29   0    1.20    0.56 
  -5  29   0    1.41    0.64 
   5  29   0    0.82    0.37 
  -5  29   0    1.46    0.57 
   5  29   0    1.18    0.37 
  -6 -29   0    1.02    0.40 
   6 -29   0   -0.07    0.33 
  -6 -29   0    0.91    0.38 
   6  29   0    0.99    0.39 
  -6  29   0    0.04    0.45 
  -6  29   0    0.29    0.45 
   6  29   0    0.39    0.33 
  -6  29   0    0.39    0.46 
  -7 -29   0    0.89    0.38 
   7 -29   0    1.39    0.57 
   7  29   0    1.89    0.47 
  -7  29   0    1.20    0.57 
  -7  29   0    1.41    0.76 
   7  29   0    1.25    0.42 
  -7  29   0    1.85    0.69 
   8 -29   0    0.56    0.50 
  -8 -29   0    0.18    0.33 
   8  29   0    0.49    0.35 
   8  29   0   -0.23    0.26 
  -8  29   0    0.59    0.64 
  -8  29   0    0.70    0.55 
  -8  29   0    0.52    0.57 
  -9 -29   0    2.70    0.54 
   9 -29   0    1.05    0.57 
   9  29   0    2.97    0.57 
   9  29   0    1.78    0.52 
  -9  29   0    2.43    0.99 
  -9  29   0    1.39    0.72 
  10 -29   0    0.92    0.58 
 -10 -29   0    1.54    0.45 
 -10  29   0    2.46    0.84 
  10  29   0    1.43    0.47 
 -10  29   0    0.44    0.63 
 -10  29   0    0.67    0.64 
  10  29   0    1.48    0.47 
  11 -29   0    1.01    0.70 
 -11 -29   0    1.51    0.45 
 -11  29   0    3.36    0.98 
 -11  29   0    1.14    0.78 
 -11  29   0    0.81    0.72 
 -12 -29   0   -0.04    0.33 
 -12  29   0    0.02    0.64 
 -12  29   0   -0.77    0.57 
 -12  29   0   -0.07    0.67 
   0 -30   0    2.06    0.47 
   0 -30   0    2.55    0.60 
   0  30   0    2.29    0.57 
   0  30   0    1.98    0.54 
   0  30   0    2.63    0.62 
  -1 -30   0    0.51    0.33 
   1 -30   0    0.63    0.37 
   1 -30   0    0.74    0.44 
  -1 -30   0    0.29    0.35 
  -1  30   0    0.74    0.41 
  -1  30   0    1.72    0.52 
   1  30   0    0.46    0.36 
  -1  30   0    0.54    0.36 
   1  30   0    0.52    0.34 
   2 -30   0    0.91    0.40 
  -2 -30   0    0.27    0.36 
  -2 -30   0   -0.10    0.28 
  -2  30   0    0.47    0.37 
  -2  30   0    0.53    0.41 
   2  30   0    0.16    0.30 
   2  30   0    0.07    0.27 
  -2  30   0    0.61    0.39 
  -3 -30   0    2.68    0.51 
  -3 -30   0    2.38    0.54 
   3 -30   0    2.21    0.58 
   3  30   0    2.22    0.52 
   3  30   0    2.82    0.55 
  -3  30   0    2.25    0.61 
  -3  30   0    3.50    0.75 
  -3  30   0    1.42    0.55 
  -4 -30   0    5.65    0.75 
   4 -30   0    4.42    0.77 
  -4 -30   0    3.82    0.58 
  -4  30   0    5.36    0.93 
  -4  30   0    4.32    0.91 
   4  30   0    4.94    0.68 
   4  30   0    4.47    0.68 
  -4  30   0    4.58    0.87 
   5 -30   0    4.53    0.80 
  -5 -30   0    4.62    0.66 
  -5 -30   0    5.39    0.66 
   5  30   0    6.84    0.79 
   5  30   0    5.38    0.70 
  -5  30   0    5.91    0.97 
  -5  30   0    6.66    1.02 
  -5  30   0    6.03    1.08 
  -6 -30   0    5.71    0.74 
   6 -30   0    3.99    0.77 
  -6  30   0    6.28    1.12 
  -6  30   0    4.21    0.87 
   6  30   0    5.41    0.70 
  -6  30   0    5.38    0.97 
   6  30   0    4.39    0.67 
  -7 -30   0   29.11    1.54 
   7 -30   0   26.91    1.76 
  -7  30   0   29.28    2.20 
   7  30   0   29.70    1.55 
  -7  30   0   26.88    1.94 
  -7  30   0   28.51    1.97 
   7  30   0   31.15    1.59 
   8 -30   0    1.80    0.61 
  -8 -30   0    0.47    0.36 
  -8  30   0    0.31    0.63 
  -8  30   0    2.15    0.76 
   8  30   0    1.74    0.49 
  -8  30   0    2.77    0.80 
   8  30   0    1.93    0.50 
   9 -30   0    2.04    0.67 
  -9 -30   0    2.94    0.58 
  -9  30   0    3.57    0.89 
   9  30   0    3.70    0.64 
  -9  30   0    1.92    0.78 
   9  30   0    3.05    0.57 
  -9  30   0    3.49    0.97 
  10 -30   0    2.78    0.81 
 -10 -30   0    3.86    0.66 
 -10  30   0    3.92    0.97 
  10  30   0    4.27    0.71 
 -10  30   0    2.74    0.89 
  10  30   0    3.01    0.60 
 -10  30   0    4.95    1.22 
 -11 -30   0    0.55    0.39 
 -11  30   0    0.05    0.64 
 -11  30   0   -0.06    0.71 
 -11  30   0   -0.15    0.61 
   0 -31   0   -0.10    0.26 
   0 -31   0   -0.20    0.32 
   0  31   0   -0.11    0.31 
   0  31   0    0.64    0.39 
   0  31   0    0.80    0.40 
  -1 -31   0    4.54    0.73 
   1 -31   0    4.44    0.72 
  -1 -31   0    4.46    0.69 
  -1  31   0    5.49    0.85 
   1  31   0    4.66    0.72 
   1  31   0    5.26    0.77 
  -1  31   0    5.83    0.88 
  -1  31   0    4.36    0.76 
  -2 -31   0    0.09    0.33 
   2 -31   0   -0.33    0.30 
  -2 -31   0   -0.23    0.27 
  -2  31   0    0.17    0.38 
  -2  31   0    0.28    0.41 
   2  31   0   -0.09    0.29 
  -2  31   0   -0.24    0.38 
   2  31   0   -0.17    0.24 
   3 -31   0   16.71    1.21 
  -3 -31   0   15.24    1.11 
  -3 -31   0   15.68    1.05 
   3  31   0   16.82    1.13 
  -3  31   0   13.98    1.50 
   3  31   0   15.46    1.07 
  -3  31   0   17.34    1.35 
  -3  31   0   16.93    1.31 
  -4 -31   0   -0.13    0.29 
   4 -31   0   -0.15    0.32 
  -4 -31   0    0.05    0.28 
   4  31   0    0.14    0.31 
  -4  31   0   -0.10    0.38 
  -4  31   0    0.20    0.42 
   4  31   0    0.19    0.33 
  -4  31   0    0.12    0.40 
  -5 -31   0    0.31    0.35 
   5 -31   0    0.49    0.45 
  -5 -31   0    0.43    0.34 
  -5  31   0    0.84    0.56 
  -5  31   0    1.24    0.58 
   5  31   0    0.88    0.39 
  -5  31   0    0.97    0.56 
   5  31   0    0.81    0.37 
  -6 -31   0    0.63    0.38 
   6 -31   0    1.97    0.58 
  -6  31   0    0.17    0.54 
  -6  31   0    0.72    0.65 
   6  31   0    0.94    0.39 
   6  31   0    0.57    0.40 
  -6  31   0    1.42    0.68 
   7 -31   0   -0.34    0.38 
  -7 -31   0    0.16    0.32 
  -7  31   0    0.27    0.51 
   7  31   0    0.40    0.38 
  -7  31   0   -0.03    0.47 
   7  31   0    0.83    0.37 
  -7  31   0    0.45    0.64 
  -8 -31   0    0.00    0.29 
   8 -31   0   -0.08    0.45 
  -8  31   0    1.01    0.74 
  -8  31   0    1.21    0.66 
  -8  31   0    1.78    0.71 
   8  31   0    1.23    0.45 
   8  31   0    0.27    0.35 
   9 -31   0    2.31    0.75 
  -9 -31   0    2.46    0.55 
  -9  31   0    1.71    0.80 
  -9  31   0    2.78    0.94 
   9  31   0    2.68    0.56 
  -9  31   0    2.60    0.87 
   9  31   0    3.24    0.62 
 -10 -31   0    0.49    0.38 
  10 -31   0    0.03    0.54 
 -10  31   0   -0.35    0.57 
 -10  31   0    0.06    0.66 
 -10  31   0   -0.51    0.56 
  10  31   0   -0.15    0.31 
  10  31   0    0.01    0.33 
 -11 -31   0    6.70    0.85 
 -11  31   0    5.87    1.41 
 -11  31   0    7.03    1.36 
 -11  31   0   12.18    1.67 
   0 -32   0    3.46    0.69 
   0 -32   0    2.91    0.57 
   0  32   0    4.88    0.81 
   0  32   0    2.98    0.62 
   0  32   0    4.06    0.71 
  -1 -32   0    0.64    0.40 
   1 -32   0    0.96    0.47 
   1  32   0    0.37    0.40 
  -1  32   0    0.70    0.39 
  -1  32   0    0.67    0.42 
  -1  32   0    0.79    0.47 
   1  32   0    1.75    0.54 
   2 -32   0   -0.50    0.28 
  -2 -32   0    0.52    0.34 
  -2 -32   0    0.15    0.37 
  -2  32   0   -0.46    0.35 
   2  32   0    0.14    0.34 
  -2  32   0    0.61    0.42 
  -2  32   0    0.20    0.40 
   2  32   0    0.55    0.38 
  -3 -32   0    5.89    0.75 
  -3 -32   0    5.43    0.78 
   3 -32   0    4.73    0.79 
   3  32   0    6.35    0.82 
  -3  32   0    5.71    1.03 
   3  32   0    5.83    0.81 
  -3  32   0    4.83    0.86 
  -3  32   0    6.25    0.98 
   4 -32   0    0.42    0.41 
  -4 -32   0    0.19    0.35 
  -4 -32   0   -0.40    0.27 
   4  32   0    0.28    0.30 
   4  32   0    0.94    0.39 
  -4  32   0    0.35    0.40 
  -4  32   0    0.29    0.43 
  -4  32   0    0.58    0.54 
  -5 -32   0    9.12    0.92 
  -5 -32   0    7.11    0.86 
   5 -32   0    6.74    0.96 
  -5  32   0    8.45    1.21 
  -5  32   0    7.40    1.14 
   5  32   0    7.18    0.86 
  -5  32   0    8.10    1.29 
   5  32   0    9.69    0.97 
  -6 -32   0    0.18    0.32 
   6 -32   0   -0.10    0.40 
  -6  32   0   -0.04    0.48 
   6  32   0   -0.20    0.32 
  -6  32   0   -0.23    0.41 
  -6  32   0   -0.03    0.58 
   6  32   0   -0.20    0.27 
   7 -32   0   13.41    1.43 
  -7 -32   0   17.50    1.18 
  -7  32   0   14.38    1.65 
  -7  32   0   16.91    2.01 
  -7  32   0   16.28    1.76 
   7  32   0   16.72    1.14 
   7  32   0   16.45    1.16 
   8 -32   0    0.98    0.61 
  -8 -32   0    0.87    0.40 
   8  32   0    1.41    0.49 
  -8  32   0    0.61    0.61 
  -8  32   0    1.95    0.79 
  -8  32   0    0.02    0.55 
   8  32   0    0.85    0.41 
   9 -32   0    1.20    0.64 
  -9 -32   0    1.65    0.48 
   9  32   0    1.28    0.50 
  -9  32   0    1.14    0.72 
   9  32   0    1.52    0.50 
  -9  32   0    2.46    0.88 
  -9  32   0    0.72    0.71 
 -10 -32   0    1.08    0.44 
 -10  32   0    2.01    0.92 
 -10  32   0    1.13    0.77 
  10  32   0    0.91    0.42 
 -10  32   0    2.17    0.90 
   0 -33   0    0.49    0.36 
   0  33   0    0.00    0.30 
   0  33   0    0.21    0.38 
   0  33   0    0.15    0.41 
   1 -33   0    3.39    0.67 
  -1 -33   0    3.94    0.78 
  -1 -33   0    2.08    0.56 
  -1  33   0    2.18    0.62 
   1  33   0    3.38    0.70 
   1  33   0    2.74    0.67 
  -1  33   0    1.79    0.60 
  -1  33   0    3.45    0.75 
   1  33   0    2.86    0.67 
   2 -33   0    3.44    0.69 
  -2 -33   0    3.32    0.60 
  -2 -33   0    3.68    0.69 
   2  33   0    3.29    0.68 
  -2  33   0    2.47    0.65 
   2  33   0    5.38    0.83 
  -2  33   0    4.06    0.86 
  -2  33   0    2.20    0.64 
   3 -33   0   12.48    1.28 
  -3 -33   0   14.27    1.12 
  -3 -33   0   12.53    1.00 
   3  33   0   11.45    1.12 
  -3  33   0   12.24    1.48 
  -3  33   0   13.40    1.41 
  -3  33   0   14.42    1.45 
   3  33   0   11.60    1.14 
  -4 -33   0   -0.11    0.34 
   4 -33   0    0.21    0.41 
  -4 -33   0    0.27    0.40 
  -4  33   0    0.45    0.49 
  -4  33   0    0.41    0.50 
  -4  33   0    0.14    0.56 
   4  33   0   -0.24    0.26 
   4  33   0    0.65    0.39 
   5 -33   0    5.95    0.95 
  -5 -33   0    6.28    0.82 
  -5  33   0    4.12    0.91 
  -5  33   0    5.61    1.00 
   5  33   0    5.23    0.75 
  -5  33   0    5.11    1.05 
   5  33   0    4.36    0.72 
  -6 -33   0    0.29    0.37 
   6 -33   0    0.07    0.46 
  -6  33   0   -0.43    0.43 
  -6  33   0   -0.42    0.42 
   6  33   0   -0.24    0.30 
  -6  33   0   -0.63    0.43 
   6  33   0   -0.01    0.30 
  -7 -33   0    0.78    0.42 
   7 -33   0    0.31    0.53 
   7  33   0    0.93    0.42 
  -7  33   0   -0.86    0.49 
   7  33   0    0.61    0.44 
  -7  33   0    0.47    0.63 
  -7  33   0    0.61    0.64 
  -8 -33   0    0.83    0.41 
   8 -33   0    1.03    0.60 
  -8  33   0    1.55    0.78 
   8  33   0    0.54    0.39 
   8  33   0    0.58    0.40 
  -8  33   0    1.24    0.70 
  -8  33   0    0.52    0.67 
  -9 -33   0    2.52    0.58 
  -9  33   0    3.55    1.04 
   9  33   0    3.69    0.67 
  -9  33   0    2.57    0.92 
   9  33   0    2.85    0.63 
  -9  33   0    2.91    1.11 
 -10 -33   0   -0.10    0.33 
 -10  33   0    0.29    0.68 
  10  33   0    1.31    0.54 
 -10  33   0    0.24    0.70 
   0 -34   0    6.30    0.87 
   0  34   0    8.52    1.08 
   0  34   0    7.11    0.98 
   0  34   0    7.32    1.00 
   1 -34   0    0.03    0.39 
  -1 -34   0   -0.12    0.41 
  -1 -34   0    0.14    0.35 
   1  34   0   -0.27    0.34 
  -1  34   0   -0.33    0.34 
   1  34   0    0.49    0.43 
  -1  34   0    0.16    0.37 
   1  34   0    0.32    0.41 
  -1  34   0    0.02    0.40 
  -2 -34   0   -0.32    0.33 
   2 -34   0   -0.55    0.31 
  -2 -34   0    0.26    0.38 
  -2  34   0   -0.34    0.35 
   2  34   0    0.08    0.35 
  -2  34   0    0.22    0.46 
  -2  34   0    0.02    0.39 
   2  34   0    0.46    0.37 
   3 -34   0    7.08    0.95 
  -3 -34   0    7.88    1.00 
  -3 -34   0    7.16    0.85 
   3  34   0    7.02    0.94 
  -3  34   0    6.82    1.04 
  -3  34   0    4.28    0.88 
  -3  34   0    6.00    1.10 
   3  34   0    6.22    0.86 
  -4 -34   0    0.54    0.42 
  -4 -34   0    0.06    0.35 
   4 -34   0    0.30    0.46 
   4  34   0   -0.05    0.34 
  -4  34   0    0.03    0.45 
  -4  34   0   -0.07    0.43 
   4  34   0    0.41    0.38 
  -4  34   0    0.79    0.59 
  -5 -34   0    4.28    0.72 
   5 -34   0    3.53    0.78 
  -5  34   0    6.81    1.19 
   5  34   0    5.98    0.81 
  -5  34   0    3.64    0.98 
   5  34   0    6.41    0.87 
  -5  34   0    6.93    1.16 
   6 -34   0    0.04    0.48 
  -6 -34   0    0.04    0.35 
  -6  34   0   -0.22    0.50 
  -6  34   0   -0.37    0.46 
   6  34   0   -0.24    0.29 
  -6  34   0    0.98    0.74 
   6  34   0   -0.13    0.30 
   7 -34   0    4.24    0.90 
  -7 -34   0    3.41    0.66 
  -7  34   0    3.46    0.94 
   7  34   0    3.99    0.71 
  -7  34   0    3.89    0.99 
  -7  34   0    4.69    1.13 
   7  34   0    3.00    0.60 
  -8 -34   0    0.61    0.42 
  -8  34   0    0.46    0.60 
  -8  34   0    1.12    0.80 
  -8  34   0    0.69    0.65 
   8  34   0   -0.48    0.34 
   8  34   0    0.16    0.36 
  -9 -34   0    1.43    0.52 
   9  34   0    2.91    0.64 
   9  34   0    2.72    0.60 
  -9  34   0    2.95    0.98 
  -9  34   0    1.71    0.95 
   0 -35   0   -0.08    0.36 
   0  35   0    0.07    0.37 
   0  35   0    0.43    0.45 
   0  35   0    0.49    0.44 
  -1 -35   0    5.14    0.78 
   1 -35   0    3.37    0.70 
   1  35   0    4.32    0.83 
   1  35   0    4.90    0.85 
  -1  35   0    6.29    1.00 
  -1  35   0    5.58    0.94 
   1  35   0    4.51    0.80 
  -1  35   0    3.78    0.85 
  -2 -35   0    1.34    0.56 
   2 -35   0    3.49    0.75 
  -2 -35   0    2.47    0.57 
  -2  35   0    2.80    0.73 
  -2  35   0    1.43    0.62 
   2  35   0    2.61    0.64 
  -2  35   0    3.82    0.85 
   2  35   0    2.98    0.67 
  -3 -35   0    7.61    0.90 
   3 -35   0    9.15    1.12 
  -3 -35   0    7.02    0.96 
   3  35   0    9.59    1.08 
  -3  35   0    8.04    1.10 
   3  35   0    8.39    1.02 
  -3  35   0    6.88    1.19 
  -3  35   0    7.08    1.08 
  -4 -35   0    6.17    0.89 
   4 -35   0    4.97    0.88 
  -4  35   0    4.83    1.00 
  -4  35   0    6.19    1.15 
   4  35   0    4.71    0.78 
  -4  35   0    7.04    1.16 
   4  35   0    7.40    0.95 
  -5 -35   0    0.10    0.39 
   5 -35   0   -0.31    0.44 
  -5  35   0    0.57    0.56 
   5  35   0   -0.09    0.36 
  -5  35   0    0.27    0.55 
   5  35   0   -0.09    0.33 
  -5  35   0   -0.38    0.52 
  -6 -35   0    2.88    0.63 
   6 -35   0    3.20    0.79 
   6  35   0    2.26    0.57 
  -6  35   0    2.60    0.91 
  -6  35   0    2.40    0.81 
  -6  35   0    2.52    0.85 
   6  35   0    3.61    0.70 
  -7 -35   0    1.19    0.49 
   7  35   0    1.36    0.53 
  -7  35   0    0.37    0.62 
   7  35   0    1.09    0.47 
  -7  35   0    1.58    0.77 
  -8 -35   0   -0.31    0.37 
  -8  35   0    0.88    0.74 
   8  35   0    1.10    0.47 
  -8  35   0    1.20    0.89 
   8  35   0    0.20    0.40 
   0 -36   0    5.12    0.81 
   0  36   0    5.11    0.87 
   0  36   0    6.34    1.03 
   0  36   0    4.37    0.84 
  -1 -36   0    1.40    0.51 
   1 -36   0    0.75    0.49 
  -1  36   0    0.90    0.53 
  -1  36   0    1.03    0.56 
   1  36   0    0.59    0.50 
   1  36   0    0.55    0.52 
  -1  36   0    1.07    0.53 
   1  36   0    0.53    0.47 
  -2 -36   0    1.42    0.53 
  -2 -36   0    1.59    0.62 
   2 -36   0    1.28    0.59 
  -2  36   0    0.28    0.48 
  -2  36   0    2.18    0.81 
   2  36   0    1.55    0.52 
  -2  36   0    1.24    0.57 
   2  36   0    1.90    0.61 
   2  36   0    1.32    0.56 
  -3 -36   0    3.43    0.74 
  -3 -36   0    3.86    0.70 
   3 -36   0    2.91    0.73 
   3  36   0    3.39    0.69 
  -3  36   0    3.56    0.84 
  -3  36   0    3.33    0.92 
   3  36   0    2.92    0.67 
  -3  36   0    2.23    0.70 
   4 -36   0   -0.19    0.45 
  -4 -36   0    0.20    0.43 
  -4  36   0    0.04    0.53 
   4  36   0    0.14    0.41 
   4  36   0   -0.01    0.35 
  -4  36   0    0.04    0.51 
  -4  36   0   -0.21    0.45 
  -5 -36   0    1.07    0.52 
   5 -36   0    0.82    0.57 
   5  36   0    1.49    0.51 
  -5  36   0    1.63    0.72 
  -5  36   0    0.91    0.64 
   5  36   0    1.85    0.57 
  -5  36   0    1.21    0.73 
  -6 -36   0    1.06    0.50 
  -6  36   0    3.51    1.05 
  -6  36   0    1.03    0.67 
   6  36   0    1.43    0.53 
   6  36   0    1.05    0.46 
  -7 -36   0   -0.71    0.34 
   7  36   0    0.01    0.39 
   7  36   0    0.24    0.40 
  -7  36   0    0.45    0.71 
  -7  36   0    0.86    0.68 
   0 -37   0   -0.12    0.43 
   0  37   0    0.88    0.49 
   0  37   0    0.47    0.46 
   0  37   0   -0.25    0.33 
  -1 -37   0    4.80    0.82 
   1 -37   0    5.58    0.90 
  -1  37   0    2.47    0.76 
   1  37   0    3.89    0.84 
   1  37   0    4.36    0.88 
  -1  37   0    3.74    0.91 
  -1  37   0    4.18    0.88 
   1  37   0    4.17    0.84 
   2 -37   0    3.70    0.79 
  -2 -37   0    2.22    0.60 
  -2  37   0    2.40    0.78 
   2  37   0    3.11    0.73 
  -2  37   0    2.93    0.80 
  -2  37   0    2.94    0.82 
   2  37   0    4.06    0.81 
   2  37   0    3.05    0.76 
   3 -37   0    2.19    0.69 
  -3 -37   0    0.88    0.55 
  -3 -37   0    2.54    0.68 
  -3  37   0    3.22    0.86 
  -3  37   0    2.49    0.81 
   3  37   0    1.71    0.59 
  -3  37   0    1.27    0.65 
   3  37   0    2.53    0.68 
   4 -37   0    7.90    1.12 
  -4 -37   0    9.34    1.17 
   4  37   0    9.02    1.09 
   4  37   0    6.06    0.92 
  -4  37   0    8.98    1.33 
  -4  37   0   10.45    1.51 
  -5 -37   0    0.74    0.50 
   5  37   0   -0.04    0.41 
  -5  37   0    1.03    0.62 
   5  37   0    0.85    0.46 
  -5  37   0    1.46    0.77 
  -6 -37   0   -0.05    0.42 
  -6  37   0   -0.32    0.52 
  -6  37   0   -0.71    0.48 
   6  37   0    0.18    0.42 
   0 -38   0    4.26    0.81 
   0  38   0    2.54    0.70 
   0  38   0    2.74    0.75 
   1 -38   0    2.04    0.66 
  -1 -38   0    3.38    0.73 
   1  38   0    1.96    0.67 
   1  38   0    2.15    0.67 
  -1  38   0    3.67    0.86 
  -1  38   0    1.29    0.70 
  -2 -38   0    6.25    0.92 
   2 -38   0    4.30    0.84 
   2  38   0    7.34    1.06 
  -2  38   0    5.34    1.01 
   2  38   0    5.78    0.97 
  -2  38   0    6.18    1.15 
  -3  38   0    2.31    0.77 
  -3  38   0    1.75    0.75 
   3  38   0    1.53    0.58 
  -4 -38   0    2.33    0.68 
  -4  38   0    1.67    0.82 
   4  38   0    2.89    0.70 
  -4  38   0    1.50    0.69 
   0 -39   0   -0.03    0.45 
   0  39   0    0.71    0.57 
   0  39   0   -0.62    0.41 
  -1 -39   0    5.83    0.93 
  -1  39   0    6.19    1.11 
  -1  39   0    6.39    1.15 
   1  39   0    6.26    1.04 
   1  39   0    6.84    1.10 
   2  39   0    2.14    0.67 
  -2  39   0    2.89    0.93 
  -2  39   0    3.07    0.85 
   2  39   0    1.38    0.62 
 -18   0   1   -0.75    0.40 
 -18   0   1   -0.51    0.60 
 -17   0   1    6.54    1.40 
 -17   0   1    7.27    1.15 
 -16   0   1   -0.79    0.43 
 -16   0   1   -0.29    0.44 
 -15   0   1   11.80    1.65 
 -15   0   1   12.29    1.38 
  15   0  -1   13.70    1.42 
 -14   0   1   -0.23    0.38 
  14   0  -1   -0.20    0.40 
 -14   0   1    0.14    0.53 
  13   0  -1    0.10    0.39 
 -13   0   1    0.32    0.50 
 -13   0   1    0.14    0.40 
 -12   0   1   -0.20    0.22 
  12   0  -1   -0.12    0.25 
 -12   0   1   -0.26    0.32 
  12   0  -1   -0.40    0.30 
 -12   0   1    0.14    0.28 
 -12   0   1   -0.20    0.44 
 -11   0   1    0.24    0.28 
 -11   0   1    0.33    0.45 
  11   0  -1    0.72    0.36 
  11   0  -1    0.45    0.27 
 -11   0   1   -0.13    0.34 
 -11   0   1   -0.48    0.21 
 -10   0   1    0.06    0.22 
  10   0  -1    0.32    0.23 
  10   0  -1   -0.18    0.24 
 -10   0   1   -0.07    0.21 
 -10   0   1   -0.05    0.29 
 -10   0   1   -0.03    0.36 
  -9   0   1   16.79    0.92 
   9   0  -1   15.39    0.82 
  -9   0   1   16.61    0.92 
   9   0  -1   17.72    1.01 
  -9   0   1   13.59    1.14 
  -9   0   1   15.43    1.06 
   8   0  -1   -0.10    0.19 
  -8   0   1    0.01    0.18 
  -8   0   1    0.04    0.19 
  -8   0   1   -0.16    0.19 
  -8   0   1    0.10    0.25 
  -8   0   1    0.02    0.29 
  -7   0   1    7.56    0.75 
   7   0  -1    7.49    0.57 
  -7   0   1    7.48    0.75 
  -7   0   1    6.72    0.79 
  -7   0   1    6.29    0.59 
  -7   0   1    6.64    0.54 
  -6   0   1    0.14    0.20 
  -6   0   1    0.00    0.24 
  -6   0   1   -0.12    0.18 
   6   0  -1    0.20    0.18 
   6   0  -1   -0.10    0.17 
  -6   0   1   -0.05    0.15 
  -6   0   1    0.09    0.19 
  -6   0   1   -0.01    0.18 
  -5   0   1   35.77    1.39 
   5   0  -1   36.44    1.46 
  -5   0   1   36.93    1.42 
   5   0  -1   36.03    1.37 
  -5   0   1   36.23    1.40 
  -5   0   1   34.83    1.43 
  -5   0   1   33.61    1.44 
  -5   0   1   35.31    1.55 
  -4   0   1   -0.17    0.16 
   4   0  -1   -0.31    0.12 
  -4   0   1   -0.21    0.17 
  -4   0   1   -0.34    0.16 
  -4   0   1   -0.02    0.15 
   4   0  -1   -0.15    0.17 
  -4   0   1   -0.30    0.11 
  -4   0   1   -0.17    0.18 
  -3   0   1  134.88    4.15 
  -3   0   1  131.24    4.26 
  -3   0   1  130.92    4.17 
  -3   0   1  134.60    4.17 
   3   0  -1  132.12    4.13 
   3   0  -1  135.97    4.21 
  -3   0   1  138.31    4.22 
  -2   0   1    0.01    0.09 
   2   0  -1    0.05    0.11 
  -2   0   1   -0.01    0.11 
   2   0  -1   -0.01    0.05 
   2   0  -1    0.02    0.08 
  -2   0   1    0.00    0.08 
  -2   0   1   -0.07    0.09 
  -1   0   1  367.92   11.09 
  -1   0   1  377.37   11.09 
   0   0  -1   -0.01    0.02 
  -1   0  -1   37.71    1.23 
  -1   0  -1   38.25    1.21 
  -1   0  -1   38.90    1.16 
  -1   0  -1   38.08    1.15 
  -1   0  -1   37.20    1.15 
  -2   0  -1   -0.46    0.11 
  -2   0  -1   -0.40    0.05 
  -2   0  -1   -0.30    0.07 
   2   0   1   -0.31    0.04 
  -2   0  -1   -0.34    0.03 
  -2   0  -1   -0.29    0.09 
  -2   0  -1   -0.39    0.05 
  -2   0  -1   -0.34    0.07 
  -3   0  -1   68.04    2.13 
  -3   0  -1   68.67    2.26 
  -3   0  -1   69.64    2.13 
   3   0   1   68.37    2.12 
  -3   0  -1   66.11    2.34 
  -3   0  -1   68.33    2.19 
  -3   0  -1   68.31    2.21 
  -4   0  -1   -0.10    0.13 
  -4   0  -1    0.05    0.10 
  -4   0  -1   -0.07    0.11 
  -4   0  -1   -0.26    0.13 
  -4   0  -1   -0.03    0.12 
  -4   0  -1    0.07    0.11 
   4   0   1   -0.03    0.09 
   5   0   1   52.51    1.78 
  -5   0  -1   53.10    1.76 
  -5   0  -1   51.83    1.92 
  -5   0  -1   52.98    2.08 
  -5   0  -1   53.95    1.77 
  -5   0  -1   50.38    1.88 
  -5   0  -1   50.67    1.85 
  -6   0  -1   -0.26    0.14 
  -6   0  -1    0.05    0.13 
  -6   0  -1   -0.17    0.13 
   6   0   1    0.07    0.15 
  -6   0  -1   -0.11    0.11 
  -6   0  -1   -0.30    0.23 
  -6   0  -1    0.09    0.17 
  -7   0  -1  149.05    4.99 
  -7   0  -1  155.38    4.91 
  -7   0  -1  148.42    4.72 
  -7   0  -1  145.82    4.72 
  -7   0  -1  154.58    4.98 
   7   0   1  149.62    4.81 
  -7   0  -1  154.14    5.25 
  -8   0  -1    0.27    0.22 
  -8   0  -1    0.00    0.20 
  -8   0  -1    0.08    0.14 
  -8   0  -1    0.25    0.30 
  -8   0  -1    0.00    0.20 
   8   0   1    0.02    0.17 
  -8   0  -1    0.09    0.15 
  -9   0  -1   30.79    1.52 
  -9   0  -1   30.23    1.77 
  -9   0  -1   29.60    1.51 
  -9   0  -1   30.84    1.44 
   9   0   1   31.05    1.40 
  -9   0  -1   32.55    1.25 
  -9   0  -1   30.39    1.23 
 -10   0  -1   -0.02    0.15 
 -10   0  -1   -0.09    0.26 
 -10   0  -1    0.28    0.17 
  10   0   1   -0.03    0.22 
 -10   0  -1    0.17    0.37 
 -10   0  -1   -0.08    0.26 
 -11   0  -1   63.91    2.67 
 -11   0  -1   59.07    2.94 
  11   0   1   63.54    2.54 
 -12   0  -1   -0.41    0.30 
  12   0   1   -0.40    0.28 
 -12   0  -1   -0.24    0.39 
  13   0   1    0.71    0.42 
 -13   0  -1    0.18    0.45 
 -13   0  -1    1.45    0.54 
 -14   0  -1   -0.12    0.35 
 -14   0  -1   -0.25    0.47 
 -15   0  -1    1.96    0.81 
 -15   0  -1    3.72    0.76 
 -16   0  -1   -0.04    0.60 
 -16   0  -1   -0.34    0.38 
 -17   0  -1   16.83    2.08 
 -17   0  -1   20.24    1.55 
 -18   0  -1    0.17    0.46 
 -18   0  -1   -0.27    0.67 
 -18  -1   1   -0.02    0.51 
 -18  -1   1   -0.29    0.61 
 -18   1   1   -0.67    0.59 
 -18   1   1   -0.20    0.47 
 -17  -1   1    1.14    0.71 
 -17  -1   1    1.60    0.66 
 -17   1   1    1.55    0.69 
 -17   1   1    1.42    0.86 
 -16  -1   1    0.77    0.69 
 -16  -1   1    0.21    0.52 
 -16   1   1   -0.86    0.34 
 -16   1   1    1.14    0.73 
 -15  -1   1    0.37    0.49 
  15  -1  -1    0.88    0.53 
 -15  -1   1    0.98    0.67 
 -15   1   1    1.13    0.68 
 -15   1   1    0.28    0.45 
  15   1  -1    0.35    0.48 
  14  -1  -1   -0.34    0.37 
 -14  -1   1   -0.18    0.38 
 -14  -1   1    0.17    0.54 
 -14   1   1    0.12    0.59 
 -14   1   1   -0.09    0.40 
  14   1  -1    0.02    0.41 
  13  -1  -1    1.90    0.60 
 -13  -1   1    2.58    0.67 
 -13  -1   1    1.89    0.70 
  13  -1  -1    2.39    0.48 
  13   1  -1    3.12    0.68 
 -13   1   1    3.62    0.91 
 -13   1   1    3.14    0.74 
  12  -1  -1    1.39    0.49 
  12  -1  -1    0.65    0.36 
 -12  -1   1    0.96    0.51 
 -12  -1   1    1.14    0.34 
 -12  -1   1    0.31    0.27 
 -12  -1   1    0.78    0.47 
  12   1  -1    0.74    0.44 
 -12   1   1    0.53    0.31 
 -12   1   1    0.77    0.46 
 -12   1   1    0.98    0.37 
  12   1  -1    0.91    0.32 
 -12   1   1    0.97    0.58 
 -11  -1   1   38.38    1.64 
 -11  -1   1   38.32    1.65 
  11  -1  -1   42.37    1.93 
 -11  -1   1   40.06    2.01 
 -11  -1   1   38.70    2.21 
  11  -1  -1   41.83    1.69 
 -11   1   1   39.15    2.03 
 -11   1   1   37.62    1.71 
 -11   1   1   41.10    1.73 
 -11   1   1   43.37    2.34 
  11   1  -1   38.98    1.88 
  11   1  -1   41.42    1.67 
 -10  -1   1   -0.16    0.29 
 -10  -1   1    0.50    0.26 
 -10  -1   1    1.12    0.52 
  10  -1  -1    0.35    0.23 
  10  -1  -1    0.68    0.33 
 -10  -1   1    0.73    0.27 
 -10   1   1    0.44    0.36 
  10   1  -1    0.70    0.25 
 -10   1   1    0.54    0.44 
  10   1  -1    0.69    0.35 
 -10   1   1    0.08    0.24 
 -10   1   1    0.46    0.29 
  -9  -1   1    5.35    0.58 
  -9  -1   1    5.07    0.72 
  -9  -1   1    4.73    0.54 
  -9  -1   1    3.88    0.72 
   9  -1  -1    4.31    0.58 
  -9   1   1    4.19    0.76 
  -9   1   1    4.55    0.55 
  -9   1   1    4.78    0.57 
  -9   1   1    4.30    0.64 
   9   1  -1    5.60    0.65 
   9   1  -1    5.30    0.50 
  -8  -1   1    1.98    0.43 
  -8  -1   1    1.87    0.34 
  -8  -1   1    1.42    0.31 
   8  -1  -1    1.63    0.36 
  -8  -1   1    1.78    0.50 
  -8  -1   1    2.47    0.47 
  -8   1   1    2.11    0.46 
   8   1  -1    1.80    0.30 
  -8   1   1    1.48    0.37 
  -8   1   1    1.82    0.36 
  -8   1   1    1.93    0.50 
   8   1  -1    1.74    0.37 
  -8   1   1    1.78    0.39 
  -8   1   1    1.12    0.31 
  -7  -1   1   32.52    1.36 
  -7  -1   1   31.42    1.49 
  -7  -1   1   33.65    1.66 
   7  -1  -1   34.18    1.67 
  -7  -1   1   31.30    1.35 
   7  -1  -1   32.37    1.39 
  -7  -1   1   33.85    1.49 
   7   1  -1   33.76    1.25 
  -7   1   1   31.57    1.63 
  -7   1   1   33.58    1.53 
  -7   1   1   35.51    1.44 
   7   1  -1   33.60    1.41 
  -7   1   1   31.60    1.45 
  -7   1   1   31.95    1.43 
  -7   1   1   32.82    1.41 
   6  -1  -1   15.85    0.82 
  -6  -1   1   16.14    0.91 
   6  -1  -1   17.26    0.94 
  -6  -1   1   16.21    0.81 
  -6  -1   1   16.18    1.00 
  -6  -1   1   17.78    0.84 
  -6  -1   1   15.60    0.89 
   6  -1  -1   16.06    0.91 
  -6   1   1   14.48    0.83 
   6   1  -1   15.99    0.83 
  -6   1   1   18.34    0.92 
  -6   1   1   15.06    0.84 
  -6   1   1   16.62    0.93 
  -6   1   1   15.40    0.99 
  -6   1   1   16.65    0.86 
  -5  -1   1   51.57    1.79 
   5  -1  -1   50.64    1.88 
  -5  -1   1   47.21    1.86 
  -5  -1   1   46.11    1.94 
   5  -1  -1   49.11    1.77 
   5  -1  -1   50.51    1.89 
  -5  -1   1   46.37    1.84 
  -5  -1   1   49.07    1.78 
   5   1  -1   49.07    1.78 
  -5   1   1   49.63    1.99 
  -5   1   1   51.01    1.90 
  -5   1   1   48.60    1.81 
   5   1  -1   52.03    1.89 
  -5   1   1   50.16    1.83 
  -5   1   1   50.20    1.83 
   4  -1  -1  170.33    5.34 
   4  -1  -1  169.31    5.33 
  -4  -1   1  173.79    5.33 
  -4  -1   1  166.25    5.32 
  -4  -1   1  164.74    5.40 
  -4  -1   1  169.63    5.31 
   4  -1  -1  174.60    5.24 
  -4  -1   1  170.20    5.25 
  -4  -1   1  172.19    5.25 
  -4   1   1  167.03    5.28 
  -4   1   1  161.62    5.25 
  -4   1   1  165.92    5.41 
   4   1  -1  175.88    5.25 
   4   1  -1  176.61    5.13 
   4   1  -1  167.20    5.31 
  -4   1   1  164.94    5.28 
  -4   1   1  166.38    5.33 
  -3  -1   1   95.87    2.98 
  -3  -1   1   93.72    2.97 
   3  -1  -1   90.67    3.02 
  -3  -1   1   93.52    3.08 
   3  -1  -1   93.52    2.95 
  -3  -1   1   93.19    3.02 
  -3   1   1   96.69    3.02 
   3   1  -1   95.95    2.87 
  -3   1   1   92.47    3.03 
   3   1  -1   92.42    2.96 
  -3   1   1   94.53    3.09 
   3   1  -1   91.94    3.01 
  -3   1   1   92.25    3.00 
  -3   1   1   92.10    2.97 
  -2  -1   1   48.47    1.57 
   2  -1  -1   49.06    1.55 
  -2  -1   1   46.06    1.59 
  -2  -1   1   46.19    1.61 
   2  -1  -1   47.06    1.60 
  -2  -1   1   47.45    1.57 
  -2   1   1   48.21    1.60 
   2   1  -1   47.99    1.59 
  -2   1   1   50.40    1.60 
  -2   1   1   46.23    1.60 
   2   1  -1   48.81    1.56 
  -2   1   1   45.71    1.54 
   2   1  -1   49.00    1.50 
  -2   1   1   47.05    1.62 
   1  -1  -1  512.07   14.97 
   1  -1  -1  522.97   14.86 
  -1  -1   1  523.81   14.92 
  -1  -1   1  504.74   14.91 
  -1  -1   1  450.83   14.88 
  -1   1   1  495.24   14.82 
  -1   1   1  442.18   14.85 
  -1   1   1  539.95   14.99 
   1   1  -1  491.47   14.99 
   0  -1  -1   27.10    0.79 
   0  -1  -1   24.00    0.80 
   0   1  -1   25.82    0.81 
   0   1  -1   26.71    0.81 
  -1  -1  -1  322.60    9.71 
  -1  -1  -1  328.93    9.72 
  -1  -1  -1  316.52    9.69 
  -1  -1  -1  329.97    9.69 
  -1  -1  -1  314.66    9.68 
   1  -1   1  316.05    9.72 
   1  -1   1  319.50    9.73 
   1  -1   1  336.28    9.69 
   1  -1   1  324.06    9.73 
  -1   1  -1  327.41    9.63 
  -1   1  -1  325.95    9.84 
  -1   1  -1  328.12    9.68 
  -1   1  -1  333.79    9.71 
  -1   1  -1  322.57    9.67 
  -1   1  -1  326.60    9.74 
  -1   1  -1  330.61    9.73 
  -1   1  -1  335.26    9.76 
  -2  -1  -1    5.43    0.20 
  -2  -1  -1    5.59    0.20 
  -2  -1  -1    5.41    0.28 
  -2  -1  -1    5.55    0.21 
   2  -1   1    5.88    0.24 
  -2  -1  -1    5.73    0.37 
  -2  -1  -1    5.71    0.28 
  -2  -1  -1    5.98    0.29 
  -2  -1  -1    5.70    0.32 
  -2   1  -1    5.41    0.36 
  -2   1  -1    5.73    0.22 
  -2   1  -1    5.57    0.28 
  -2   1  -1    5.93    0.29 
  -2   1  -1    6.07    0.28 
  -2   1  -1    6.12    0.28 
   2   1   1    5.77    0.23 
  -3  -1  -1   26.52    1.11 
  -3  -1  -1   27.62    0.88 
  -3  -1  -1   26.74    1.04 
  -3  -1  -1   27.42    0.99 
   3  -1   1   28.01    0.92 
  -3  -1  -1   27.64    1.00 
  -3  -1  -1   27.50    0.90 
  -3  -1  -1   27.24    0.90 
  -3   1  -1   26.54    0.98 
  -3   1  -1   26.81    0.97 
  -3   1  -1   27.76    1.01 
  -3   1  -1   27.57    0.97 
   3   1   1   27.35    0.93 
  -3   1  -1   26.84    1.13 
  -4  -1  -1    0.27    0.10 
  -4  -1  -1    0.28    0.16 
  -4  -1  -1    0.32    0.16 
  -4  -1  -1    0.55    0.23 
  -4  -1  -1    0.28    0.11 
  -4  -1  -1    0.26    0.16 
   4  -1   1    0.43    0.12 
  -4   1  -1    0.32    0.15 
  -4   1  -1    0.18    0.15 
   4   1   1    0.26    0.12 
  -4   1  -1    0.11    0.19 
  -4   1  -1    0.47    0.15 
  -4   1  -1    0.31    0.14 
  -4   1  -1    0.12    0.14 
  -5  -1  -1   29.55    1.37 
  -5  -1  -1   28.60    1.05 
  -5  -1  -1   29.27    1.18 
  -5  -1  -1   28.92    1.23 
   5  -1   1   30.61    1.11 
  -5  -1  -1   30.20    1.06 
  -5  -1  -1   28.76    1.20 
  -5   1  -1   30.04    1.38 
  -5   1  -1   28.13    1.21 
   5   1   1   31.09    1.12 
  -5   1  -1   28.67    1.12 
  -5   1  -1   29.53    1.25 
  -5   1  -1   29.19    1.12 
  -5   1  -1   30.45    1.18 
  -6  -1  -1   28.15    1.28 
  -6  -1  -1   30.65    1.25 
  -6  -1  -1   27.72    1.08 
  -6  -1  -1   30.19    1.09 
  -6  -1  -1   29.58    1.45 
   6  -1   1   28.54    1.16 
  -6  -1  -1   29.57    1.27 
  -6   1  -1   29.96    1.47 
  -6   1  -1   28.48    1.30 
  -6   1  -1   28.95    1.28 
   6   1   1   28.59    1.16 
  -6   1  -1   30.70    1.16 
  -6   1  -1   30.57    1.16 
  -6   1  -1   29.64    1.23 
  -7  -1  -1   27.94    1.30 
  -7  -1  -1   27.50    1.08 
  -7  -1  -1   28.00    1.26 
  -7  -1  -1   29.12    1.53 
  -7  -1  -1   27.99    1.08 
  -7  -1  -1   28.10    1.32 
   7  -1   1   29.13    1.20 
  -7   1  -1   29.42    1.17 
  -7   1  -1   28.68    1.52 
  -7   1  -1   26.86    1.31 
  -7   1  -1   28.44    1.15 
  -7   1  -1   29.05    1.26 
   7   1   1   27.50    1.19 
  -7   1  -1   27.42    1.32 
  -8  -1  -1    0.28    0.32 
  -8  -1  -1    0.28    0.17 
  -8  -1  -1    0.41    0.26 
  -8  -1  -1   -0.03    0.13 
  -8  -1  -1    0.75    0.28 
   8  -1   1    0.27    0.21 
  -8  -1  -1    0.41    0.26 
  -8   1  -1    0.36    0.26 
  -8   1  -1    0.27    0.22 
  -8   1  -1    0.49    0.21 
   8   1   1    0.36    0.22 
  -8   1  -1    0.29    0.18 
  -8   1  -1    0.94    0.42 
  -8   1  -1    0.66    0.29 
   9  -1   1    1.19    0.35 
  -9  -1  -1    0.83    0.30 
  -9  -1  -1    1.24    0.39 
  -9  -1  -1    1.01    0.50 
  -9  -1  -1    1.33    0.26 
  -9  -1  -1    0.73    0.33 
  -9  -1  -1    1.11    0.23 
  -9   1  -1    0.55    0.24 
  -9   1  -1    1.28    0.37 
  -9   1  -1    0.49    0.42 
  -9   1  -1    0.65    0.31 
   9   1   1    0.57    0.28 
  -9   1  -1    0.89    0.36 
  -9   1  -1    0.79    0.24 
  10  -1   1    3.84    0.58 
 -10  -1  -1    5.55    0.73 
 -10  -1  -1    4.29    0.81 
 -10  -1  -1    4.53    0.43 
 -10  -1  -1    4.50    0.42 
 -10   1  -1    5.39    0.51 
  10   1   1    5.29    0.66 
 -10   1  -1    4.56    0.84 
 -10   1  -1    3.71    0.64 
 -10   1  -1    4.50    0.46 
 -10   1  -1    3.74    0.67 
 -11  -1  -1   10.04    1.26 
  11  -1   1   11.19    0.87 
 -11  -1  -1   12.99    1.17 
 -11   1  -1    9.59    1.06 
 -11   1  -1   11.77    1.39 
 -11   1  -1   10.14    0.65 
  11   1   1   11.18    0.89 
 -11   1  -1   10.90    1.08 
 -12  -1  -1    0.20    0.33 
  12  -1   1   -0.37    0.30 
 -12  -1  -1   -0.11    0.42 
  12   1   1   -0.33    0.23 
 -12   1  -1    0.25    0.37 
 -12   1  -1   -0.20    0.42 
  12   1   1    0.25    0.35 
 -13  -1  -1    8.09    1.00 
 -13  -1  -1    8.70    1.25 
  13  -1   1    9.41    1.03 
  13   1   1    9.14    1.02 
 -13   1  -1    8.33    1.04 
 -13   1  -1   10.01    1.37 
 -14  -1  -1    0.02    0.38 
 -14  -1  -1   -0.12    0.46 
  14  -1   1    0.06    0.40 
 -14   1  -1    0.39    0.51 
 -14   1  -1    0.90    0.46 
 -15  -1  -1    9.91    1.17 
 -15  -1  -1   11.51    1.63 
 -15   1  -1   13.91    1.81 
 -15   1  -1   12.47    1.34 
 -16  -1  -1    3.11    0.95 
 -16  -1  -1    2.12    0.63 
 -16   1  -1    3.43    1.03 
 -16   1  -1    2.38    0.68 
 -17  -1  -1    9.63    1.15 
 -17  -1  -1    6.49    1.29 
 -17   1  -1    8.94    1.51 
 -17   1  -1    9.40    1.20 
 -18  -1  -1   -0.74    0.62 
 -18  -1  -1   -0.08    0.43 
 -18   1  -1   -0.02    0.46 
 -18   1  -1    0.39    0.72 
 -18  -2   1    0.62    0.56 
 -18  -2   1    0.05    0.60 
 -18   2   1    0.02    0.68 
 -18   2   1    1.48    0.66 
 -17  -2   1    7.02    1.08 
 -17  -2   1    5.78    1.26 
 -17   2   1    6.86    1.15 
 -17   2   1    6.51    1.36 
 -16  -2   1   -0.25    0.36 
 -16  -2   1    0.04    0.57 
 -16   2   1    0.23    0.47 
 -16   2   1   -0.46    0.58 
 -15  -2   1   14.65    1.76 
 -15  -2   1   14.71    1.52 
  15  -2  -1   17.21    1.59 
  15   2  -1   14.68    1.47 
 -15   2   1   12.35    1.44 
 -15   2   1   13.09    1.74 
 -14  -2   1    0.11    0.40 
  14  -2  -1   -0.09    0.41 
 -14  -2   1    0.24    0.52 
 -14   2   1    0.48    0.55 
  14   2  -1    0.03    0.38 
 -14   2   1    0.09    0.42 
 -13  -2   1    1.60    0.55 
 -13  -2   1    1.76    0.69 
  13  -2  -1    0.87    0.45 
  13  -2  -1    1.25    0.40 
  13   2  -1    2.10    0.59 
 -13   2   1    2.00    0.62 
 -13   2   1    1.27    0.64 
  12  -2  -1    0.10    0.39 
  12  -2  -1   -0.31    0.27 
 -12  -2   1   -0.11    0.34 
 -12  -2   1   -0.17    0.20 
 -12  -2   1   -0.44    0.44 
  12   2  -1    0.23    0.36 
 -12   2   1   -0.19    0.25 
 -12   2   1   -0.19    0.44 
 -12   2   1    0.03    0.30 
 -12   2   1   -0.63    0.36 
  11  -2  -1    0.01    0.33 
  11  -2  -1    0.14    0.25 
 -11  -2   1   -0.24    0.31 
 -11  -2   1    0.37    0.26 
 -11  -2   1   -0.21    0.37 
 -11  -2   1    0.32    0.26 
  11   2  -1    0.23    0.36 
  11   2  -1    0.42    0.24 
 -11   2   1   -0.23    0.40 
 -11   2   1   -0.34    0.23 
 -11   2   1   -0.12    0.25 
 -11   2   1   -0.34    0.33 
 -10  -2   1    2.76    0.42 
 -10  -2   1    2.25    0.52 
 -10  -2   1    2.08    0.61 
 -10  -2   1    3.01    0.44 
  10  -2  -1    2.15    0.47 
 -10   2   1    2.98    0.73 
  10   2  -1    3.88    0.45 
  10   2  -1    3.06    0.54 
 -10   2   1    2.01    0.52 
 -10   2   1    2.52    0.46 
 -10   2   1    1.68    0.41 
  -9  -2   1   31.45    1.34 
  -9  -2   1   31.17    1.74 
   9  -2  -1   30.51    1.46 
  -9  -2   1   30.02    1.32 
  -9  -2   1   33.85    1.61 
   9   2  -1   30.12    1.26 
  -9   2   1   30.45    1.60 
  -9   2   1   31.55    1.44 
   9   2  -1   31.67    1.47 
  -9   2   1   30.84    1.43 
  -9   2   1   28.32    1.47 
  -9   2   1   30.82    1.76 
  -8  -2   1    1.18    0.36 
  -8  -2   1    1.66    0.32 
  -8  -2   1    1.66    0.48 
  -8  -2   1    1.91    0.33 
  -8  -2   1    1.60    0.39 
   8  -2  -1    2.94    0.48 
  -8   2   1    2.40    0.44 
  -8   2   1    2.35    0.45 
  -8   2   1    1.98    0.40 
  -8   2   1    1.71    0.37 
  -8   2   1    2.05    0.45 
   8   2  -1    2.40    0.43 
  -8   2   1    2.86    0.59 
   8   2  -1    1.68    0.29 
  -7  -2   1    1.58    0.31 
   7  -2  -1    0.69    0.30 
   7  -2  -1    1.26    0.35 
  -7  -2   1    1.31    0.37 
  -7  -2   1    0.97    0.37 
  -7  -2   1    1.43    0.35 
  -7  -2   1    1.10    0.27 
   7  -2  -1    1.29    0.32 
  -7   2   1    1.06    0.31 
  -7   2   1    1.01    0.30 
  -7   2   1    1.23    0.35 
  -7   2   1    1.33    0.42 
  -7   2   1    1.43    0.34 
  -7   2   1    0.79    0.29 
   7   2  -1    0.79    0.20 
   7   2  -1    0.96    0.29 
  -6  -2   1   -0.06    0.21 
   6  -2  -1    0.34    0.23 
   6  -2  -1   -0.18    0.17 
  -6  -2   1    0.24    0.26 
  -6  -2   1    0.33    0.18 
   6  -2  -1    0.19    0.19 
  -6  -2   1    0.03    0.16 
  -6  -2   1    0.04    0.20 
   6   2  -1    0.16    0.19 
   6   2  -1    0.14    0.12 
  -6   2   1   -0.03    0.18 
  -6   2   1   -0.12    0.19 
  -6   2   1    0.22    0.19 
  -6   2   1    0.12    0.26 
  -6   2   1    0.17    0.20 
   5  -2  -1   37.90    1.53 
   5  -2  -1   37.55    1.43 
  -5  -2   1   37.45    1.51 
  -5  -2   1   39.59    1.64 
  -5  -2   1   37.98    1.51 
  -5  -2   1   36.31    1.40 
  -5  -2   1   37.33    1.51 
  -5  -2   1   38.35    1.42 
  -5   2   1   38.17    1.47 
  -5   2   1   36.20    1.47 
   5   2  -1   39.38    1.45 
  -5   2   1   35.40    1.47 
  -5   2   1   37.14    1.62 
  -5   2   1   34.67    1.51 
   5   2  -1   39.52    1.30 
   4  -2  -1   48.56    1.67 
  -4  -2   1   46.75    1.81 
  -4  -2   1   50.78    1.77 
  -4  -2   1   48.20    1.66 
   4  -2  -1   50.55    1.78 
  -4  -2   1   46.56    1.66 
  -4  -2   1   46.11    1.74 
   4   2  -1   50.13    1.69 
  -4   2   1   45.38    1.72 
  -4   2   1   46.67    1.76 
   4   2  -1   49.43    1.56 
  -4   2   1   46.69    1.83 
  -4   2   1   47.65    1.70 
   4   2  -1   44.97    1.72 
   3  -2  -1   23.79    0.92 
  -3  -2   1   22.96    0.98 
   3  -2  -1   25.31    1.01 
  -3  -2   1   24.44    0.98 
  -3  -2   1   24.81    1.03 
  -3  -2   1   24.40    0.93 
  -3  -2   1   23.81    0.92 
   3   2  -1   25.09    0.84 
  -3   2   1   24.96    1.00 
   3   2  -1   25.76    0.94 
  -3   2   1   25.37    1.05 
  -3   2   1   23.93    0.93 
   3   2  -1   22.51    0.96 
  -3   2   1   26.17    1.02 
  -3   2   1   25.33    0.99 
  -2  -2   1    3.15    0.23 
  -2  -2   1    3.47    0.26 
   2  -2  -1    3.64    0.27 
  -2  -2   1    3.38    0.27 
  -2  -2   1    2.98    0.23 
   2  -2  -1    3.45    0.23 
  -2   2   1    3.33    0.23 
   2   2  -1    3.53    0.19 
   2   2  -1    3.18    0.25 
  -2   2   1    3.56    0.27 
  -2   2   1    3.48    0.28 
  -2   2   1    3.40    0.27 
   2   2  -1    3.81    0.25 
  -2   2   1    2.61    0.27 
  -1  -2   1   87.13    2.70 
   1  -2  -1   88.12    2.72 
  -1  -2   1   86.78    2.70 
   1  -2  -1   88.00    2.69 
  -1  -2   1   85.31    2.70 
  -1  -2   1   88.06    2.72 
  -1   2   1   90.17    2.73 
  -1   2   1   87.39    2.72 
   1   2  -1   87.76    2.66 
   1   2  -1   87.38    2.72 
   1   2  -1   94.50    2.70 
  -1   2   1   90.07    2.72 
  -1   2   1   87.90    2.66 
  -1   2   1   88.63    2.72 
   0  -2  -1   17.79    0.55 
   0  -2  -1   16.90    0.56 
   0  -2  -1   17.61    0.56 
   0  -2  -1   17.66    0.57 
   0   2   1   17.05    0.57 
   0   2  -1   17.18    0.56 
   0   2  -1   16.98    0.56 
   1  -2   1   60.51    1.78 
   1  -2   1   57.03    1.78 
   1  -2   1   58.08    1.79 
  -1  -2  -1   56.53    1.81 
  -1  -2  -1   56.88    1.77 
  -1  -2  -1   57.59    1.77 
  -1  -2  -1   58.68    1.84 
   1   2   1   57.75    1.77 
  -1   2  -1   57.72    1.78 
  -1   2  -1   58.07    1.81 
  -1   2  -1   59.54    1.81 
   1   2   1   58.61    1.75 
  -1   2  -1   59.35    1.80 
  -1   2  -1   60.01    1.80 
  -1   2  -1   58.03    1.83 
  -2  -2  -1    3.61    0.24 
  -2  -2  -1    4.15    0.18 
  -2  -2  -1    3.82    0.23 
  -2  -2  -1    3.66    0.30 
  -2  -2  -1    4.05    0.27 
  -2  -2  -1    4.07    0.16 
   2  -2   1    4.65    0.21 
  -2  -2  -1    4.14    0.16 
  -2   2  -1    3.96    0.25 
   2   2   1    4.32    0.21 
  -2   2  -1    4.24    0.27 
  -2   2  -1    4.24    0.26 
  -2   2  -1    4.16    0.24 
  -2   2  -1    3.81    0.32 
  -2   2  -1    4.07    0.28 
  -3  -2  -1   84.04    2.54 
  -3  -2  -1   82.44    2.66 
   3  -2   1   86.85    2.60 
  -3  -2  -1   85.52    2.81 
  -3  -2  -1   84.15    2.71 
  -3  -2  -1   87.89    2.54 
  -3  -2  -1   83.88    2.55 
  -3  -2  -1   82.00    2.65 
  -3   2  -1   81.05    2.66 
  -3   2  -1   87.39    2.68 
  -3   2  -1   86.20    2.84 
  -3   2  -1   81.87    2.68 
  -3   2  -1   82.14    2.72 
  -3   2  -1   82.05    2.65 
   3   2   1   84.54    2.60 
  -4  -2  -1    4.15    0.38 
  -4  -2  -1    3.80    0.35 
  -4  -2  -1    3.16    0.21 
  -4  -2  -1    2.66    0.40 
  -4  -2  -1    3.85    0.40 
   4  -2   1    3.54    0.25 
  -4  -2  -1    3.04    0.33 
  -4  -2  -1    3.26    0.21 
  -4   2  -1    2.15    0.29 
  -4   2  -1    2.58    0.29 
  -4   2  -1    3.85    0.34 
  -4   2  -1    3.24    0.33 
  -4   2  -1    3.18    0.37 
   4   2   1    3.30    0.29 
  -4   2  -1    3.12    0.44 
  -5  -2  -1   23.57    1.04 
  -5  -2  -1   24.12    1.08 
  -5  -2  -1   25.23    0.90 
  -5  -2  -1   23.72    1.19 
  -5  -2  -1   23.67    1.04 
   5  -2   1   24.63    0.96 
  -5  -2  -1   24.37    0.89 
  -5   2  -1   23.70    1.01 
   5   2   1   26.17    0.99 
  -5   2  -1   24.81    1.08 
  -5   2  -1   26.16    1.26 
  -5   2  -1   25.76    1.02 
  -5   2  -1   26.84    1.12 
  -5   2  -1   25.19    1.03 
  -6  -2  -1    8.04    0.56 
  -6  -2  -1    6.61    0.39 
  -6  -2  -1    7.89    0.79 
  -6  -2  -1    7.72    0.55 
   6  -2   1    7.33    0.48 
  -6  -2  -1    7.25    0.57 
  -6  -2  -1    7.27    0.39 
   6   2   1    7.35    0.49 
  -6   2  -1    7.70    0.80 
  -6   2  -1    7.64    0.51 
  -6   2  -1    7.59    0.51 
  -6   2  -1    8.14    0.54 
  -6   2  -1    7.71    0.58 
  -6   2  -1    7.47    0.58 
  -7  -2  -1    5.08    0.35 
  -7  -2  -1    5.06    0.34 
  -7  -2  -1    4.66    0.52 
  -7  -2  -1    4.71    0.68 
  -7  -2  -1    5.60    0.57 
  -7  -2  -1    5.79    0.63 
   7  -2   1    4.85    0.48 
  -7   2  -1    5.22    0.50 
  -7   2  -1    6.05    0.65 
  -7   2  -1    4.88    0.71 
  -7   2  -1    5.24    0.53 
  -7   2  -1    5.14    0.59 
  -7   2  -1    4.59    0.47 
   7   2   1    5.45    0.52 
  -8  -2  -1    0.10    0.28 
  -8  -2  -1    0.08    0.14 
  -8  -2  -1    0.23    0.15 
  -8  -2  -1    0.25    0.25 
   8  -2   1   -0.18    0.16 
  -8  -2  -1    0.07    0.21 
  -8  -2  -1    0.01    0.21 
  -8   2  -1   -0.33    0.23 
  -8   2  -1    0.04    0.17 
  -8   2  -1    0.09    0.20 
  -8   2  -1    0.31    0.26 
  -8   2  -1   -0.01    0.18 
   8   2   1   -0.04    0.18 
  -8   2  -1    0.15    0.22 
  -9  -2  -1   41.61    1.47 
  -9  -2  -1   41.70    2.10 
  -9  -2  -1   40.61    1.45 
  -9  -2  -1   41.12    1.77 
  -9  -2  -1   38.29    1.78 
   9  -2   1   42.02    1.73 
  -9   2  -1   44.64    1.91 
  -9   2  -1   40.15    1.86 
   9   2   1   41.39    1.72 
  -9   2  -1   39.08    2.08 
  -9   2  -1   39.25    1.59 
  -9   2  -1   40.03    1.60 
 -10  -2  -1    0.09    0.16 
 -10  -2  -1    0.35    0.17 
 -10  -2  -1    0.61    0.41 
 -10  -2  -1   -0.05    0.26 
  10  -2   1   -0.25    0.22 
 -10   2  -1   -0.08    0.20 
 -10   2  -1    0.02    0.29 
 -10   2  -1    0.12    0.21 
 -10   2  -1   -0.26    0.36 
  10   2   1   -0.10    0.24 
 -10   2  -1    0.03    0.28 
 -11  -2  -1   17.77    1.19 
 -11  -2  -1   18.30    1.43 
  11  -2   1   16.20    1.08 
 -11   2  -1   16.82    1.20 
  11   2   1   17.98    1.11 
 -11   2  -1   17.20    1.21 
 -11   2  -1   18.45    0.92 
 -11   2  -1   17.28    0.89 
 -11   2  -1   16.28    1.67 
  12  -2   1    3.50    0.64 
 -12  -2  -1    3.29    0.81 
 -12  -2  -1    2.92    0.61 
  12   2   1    4.15    0.68 
 -12   2  -1    3.23    0.68 
 -12   2  -1    2.83    0.62 
 -12   2  -1    2.35    0.76 
 -13  -2  -1    0.07    0.44 
  13  -2   1   -0.03    0.34 
 -13  -2  -1    0.17    0.33 
 -13   2  -1   -0.10    0.43 
 -13   2  -1    0.12    0.35 
  13   2   1   -0.49    0.34 
 -14  -2  -1   -0.03    0.48 
 -14  -2  -1   -0.13    0.34 
  14  -2   1    1.07    0.51 
 -14   2  -1   -0.09    0.39 
 -14   2  -1    0.14    0.49 
 -15  -2  -1    0.15    0.57 
 -15  -2  -1   -0.12    0.38 
 -15   2  -1    0.00    0.42 
 -15   2  -1    0.09    0.56 
 -16  -2  -1    1.19    0.69 
 -16  -2  -1    1.39    0.55 
 -16   2  -1    0.74    0.70 
 -16   2  -1    1.36    0.61 
 -17  -2  -1    3.75    0.76 
 -17  -2  -1    4.15    1.18 
 -17   2  -1    4.05    0.86 
 -17   2  -1    1.79    0.87 
 -18  -2  -1    1.19    0.57 
 -18  -2  -1    0.72    0.83 
 -18   2  -1    0.43    0.82 
 -18   2  -1    0.58    0.54 
 -18  -3   1   -0.65    0.38 
 -18  -3   1   -1.02    0.44 
 -18   3   1   -0.40    0.44 
 -18   3   1   -0.51    0.68 
 -17  -3   1    0.55    0.45 
 -17  -3   1    0.59    0.66 
 -17   3   1    0.04    0.53 
 -17   3   1   -0.07    0.62 
  16  -3  -1    0.01    0.52 
 -16  -3   1    1.00    0.51 
 -16  -3   1   -0.47    0.48 
 -16   3   1    0.33    0.51 
 -16   3   1   -0.11    0.59 
 -15  -3   1    0.88    0.51 
  15  -3  -1    1.18    0.55 
 -15  -3   1    1.52    0.76 
 -15   3   1    1.49    0.63 
  15   3  -1    1.03    0.56 
 -15   3   1    0.63    0.58 
 -14  -3   1   -0.41    0.35 
  14  -3  -1    0.10    0.43 
  14  -3  -1   -0.22    0.32 
 -14  -3   1   -0.48    0.43 
 -14   3   1   -0.14    0.47 
 -14   3   1    0.32    0.48 
  14   3  -1   -0.22    0.37 
 -13  -3   1    4.40    0.78 
  13  -3  -1    3.86    0.72 
 -13  -3   1    4.23    0.92 
  13  -3  -1    4.83    0.66 
 -13   3   1    2.25    0.77 
 -13   3   1    3.57    0.78 
  13   3  -1    4.13    0.73 
  12  -3  -1    6.11    0.83 
 -12  -3   1    5.57    0.97 
  12  -3  -1    6.47    0.72 
 -12  -3   1    5.26    0.78 
 -12   3   1    4.32    0.84 
  12   3  -1    7.86    0.91 
 -12   3   1    6.59    1.14 
 -12   3   1    5.43    0.68 
 -12   3   1    4.04    0.63 
 -11  -3   1   15.24    0.88 
 -11  -3   1   17.77    0.90 
  11  -3  -1   17.67    1.16 
 -11  -3   1   17.58    1.39 
 -11  -3   1   17.03    1.21 
 -11   3   1   16.47    1.03 
 -11   3   1   13.66    1.52 
 -11   3   1   16.82    1.26 
  11   3  -1   16.54    0.90 
  11   3  -1   18.09    1.16 
 -11   3   1   18.50    1.08 
 -10  -3   1   -0.26    0.17 
  10  -3  -1   -0.11    0.25 
 -10  -3   1    0.03    0.20 
 -10  -3   1   -0.14    0.33 
 -10  -3   1   -0.09    0.27 
 -10   3   1   -0.21    0.39 
 -10   3   1   -0.42    0.23 
 -10   3   1    0.14    0.30 
 -10   3   1   -0.16    0.24 
  10   3  -1   -0.26    0.18 
 -10   3   1   -0.34    0.27 
  10   3  -1    0.06    0.28 
  -9  -3   1   19.39    1.31 
  -9  -3   1   18.99    1.15 
  -9  -3   1   18.42    0.93 
  -9  -3   1   17.61    0.92 
   9  -3  -1   17.84    1.06 
   9   3  -1   19.27    1.08 
  -9   3   1   18.79    1.20 
  -9   3   1   18.81    1.07 
  -9   3   1   17.83    1.05 
   9   3  -1   18.54    0.88 
  -9   3   1   20.28    1.37 
  -9   3   1   20.67    1.16 
  -8  -3   1    1.59    0.31 
   8  -3  -1    1.84    0.44 
   8  -3  -1    1.72    0.45 
  -8  -3   1    1.96    0.42 
  -8  -3   1    1.08    0.35 
   8  -3  -1    1.21    0.33 
  -8  -3   1    0.83    0.25 
  -8  -3   1    1.27    0.43 
  -8   3   1    1.54    0.39 
   8   3  -1    0.96    0.32 
  -8   3   1    1.57    0.48 
  -8   3   1    1.00    0.33 
  -8   3   1    1.43    0.34 
   8   3  -1    1.52    0.27 
  -8   3   1    0.69    0.35 
  -8   3   1    0.92    0.34 
   7  -3  -1   22.54    1.08 
  -7  -3   1   21.77    1.00 
  -7  -3   1   21.32    0.98 
  -7  -3   1   22.29    1.16 
   7  -3  -1   22.16    1.19 
  -7  -3   1   24.38    1.31 
   7  -3  -1   21.31    1.19 
  -7  -3   1   21.58    1.15 
  -7   3   1   21.37    1.10 
   7   3  -1   24.45    1.11 
  -7   3   1   21.73    1.12 
  -7   3   1   23.81    1.34 
  -7   3   1   22.23    1.20 
  -7   3   1   22.83    1.13 
   7   3  -1   24.14    0.93 
  -6  -3   1    3.31    0.38 
  -6  -3   1    4.04    0.40 
  -6  -3   1    2.41    0.41 
  -6  -3   1    3.90    0.57 
   6  -3  -1    4.13    0.45 
  -6  -3   1    4.87    0.56 
   6  -3  -1    4.50    0.57 
  -6  -3   1    3.72    0.49 
  -6   3   1    3.31    0.45 
  -6   3   1    3.88    0.47 
   6   3  -1    4.50    0.48 
  -6   3   1    3.44    0.55 
  -6   3   1    4.68    0.58 
  -6   3   1    4.01    0.50 
   6   3  -1    3.76    0.29 
  -5  -3   1   39.91    1.61 
  -5  -3   1   40.47    1.48 
  -5  -3   1   39.71    1.59 
   5  -3  -1   42.37    1.53 
   5  -3  -1   41.92    1.64 
  -5  -3   1   40.12    1.69 
  -5  -3   1   41.64    1.49 
   5   3  -1   40.82    1.53 
  -5   3   1   40.67    1.56 
  -5   3   1   41.11    1.61 
  -5   3   1   40.06    1.73 
   5   3  -1   39.41    1.37 
  -5   3   1   41.16    1.65 
  -4  -3   1   22.82    0.88 
  -4  -3   1   20.28    0.94 
  -4  -3   1   20.09    0.95 
  -4  -3   1   21.53    1.02 
   4  -3  -1   21.12    0.88 
   4  -3  -1   19.80    0.96 
  -4  -3   1   22.44    0.87 
   4   3  -1   21.08    0.94 
  -4   3   1   21.28    0.91 
  -4   3   1   20.49    0.95 
  -4   3   1   23.20    0.99 
  -4   3   1   21.34    1.04 
  -4   3   1   22.34    0.99 
   4   3  -1   21.35    0.90 
   4   3  -1   21.70    0.78 
  -3  -3   1   29.50    1.15 
  -3  -3   1   30.82    1.09 
   3  -3  -1   29.51    1.10 
  -3  -3   1   31.62    1.18 
  -3  -3   1   29.67    1.08 
  -3  -3   1   29.69    1.19 
   3  -3  -1   29.42    1.17 
   3   3  -1   29.85    1.14 
   3   3  -1   30.73    1.11 
  -3   3   1   31.31    1.12 
  -3   3   1   31.75    1.19 
   3   3  -1   30.72    1.00 
  -3   3   1   28.93    1.16 
  -3   3   1   30.73    1.23 
  -3   3   1   29.99    1.18 
  -2  -3   1   11.97    0.49 
  -2  -3   1   12.21    0.50 
   2  -3  -1   12.13    0.55 
  -2  -3   1   11.26    0.52 
   2  -3  -1   11.99    0.50 
  -2  -3   1   12.13    0.54 
  -2   3   1   12.84    0.58 
   2   3  -1   11.18    0.49 
  -2   3   1   11.35    0.55 
  -2   3   1   11.14    0.54 
   2   3  -1   11.44    0.43 
  -2   3   1   12.36    0.49 
  -2   3   1   12.10    0.55 
   2   3  -1   11.50    0.52 
   1  -3  -1  276.24    8.48 
  -1  -3   1  290.26    8.46 
  -1  -3   1  279.26    8.45 
  -1  -3   1  287.43    8.45 
  -1  -3   1  286.37    8.47 
   1  -3  -1  278.41    8.45 
   1   3  -1  284.17    8.51 
  -1   3   1  294.86    8.48 
  -1   3   1  288.75    8.49 
  -1   3   1  293.80    8.48 
  -1   3   1  278.31    8.47 
   1   3  -1  281.64    8.44 
  -1   3   1  277.98    8.48 
   1   3  -1  293.20    8.47 
   0  -3   1   65.50    2.03 
   0  -3   1   65.77    2.03 
   0  -3  -1   67.10    2.03 
   0  -3  -1   68.29    2.03 
   0  -3  -1   67.44    2.03 
   0  -3   1   70.05    2.04 
   0   3  -1   66.81    2.02 
   0   3  -1   65.70    2.02 
   0   3  -1   64.14    2.02 
   0   3   1   68.47    2.02 
   0   3   1   67.34    2.02 
   0   3   1   64.51    2.03 
   0   3  -1   65.83    2.03 
   0   3  -1   67.82    2.03 
  -1  -3  -1   14.74    0.48 
  -1  -3  -1   14.75    0.50 
   1  -3   1   15.11    0.52 
   1  -3   1   15.45    0.53 
  -1  -3  -1   14.45    0.55 
  -1  -3  -1   15.02    0.51 
  -1  -3  -1   14.32    0.50 
  -1   3  -1   14.21    0.55 
  -1   3  -1   14.42    0.57 
   1   3   1   14.75    0.50 
  -1   3  -1   15.32    0.54 
  -1   3  -1   14.29    0.54 
  -1   3  -1   14.94    0.53 
  -1   3  -1   14.90    0.52 
   2  -3   1    5.09    0.28 
  -2  -3  -1    4.76    0.26 
  -2  -3  -1    4.55    0.19 
   2  -3   1    4.83    0.23 
  -2  -3  -1    4.49    0.32 
  -2  -3  -1    4.19    0.22 
  -2  -3  -1    4.39    0.24 
  -2  -3  -1    4.61    0.19 
   2   3   1    4.55    0.24 
  -2   3  -1    4.84    0.28 
  -2   3  -1    4.70    0.29 
  -2   3  -1    4.36    0.29 
  -2   3  -1    5.26    0.37 
  -2   3  -1    4.74    0.25 
  -2   3  -1    4.51    0.30 
  -3  -3  -1  129.68    4.17 
  -3  -3  -1  131.02    4.20 
  -3  -3  -1  138.04    4.32 
  -3  -3  -1  132.62    4.15 
  -3  -3  -1  135.45    4.03 
   3  -3   1  138.88    4.11 
  -3  -3  -1  137.62    4.03 
  -3   3  -1  135.59    4.20 
  -3   3  -1  139.64    4.21 
  -3   3  -1  130.84    4.33 
   3   3   1  138.25    4.12 
  -3   3  -1  135.08    4.23 
  -3   3  -1  138.07    4.16 
  -3   3  -1  133.00    4.20 
  -4  -3  -1    5.06    0.25 
  -4  -3  -1    5.72    0.40 
  -4  -3  -1    4.41    0.35 
  -4  -3  -1    4.67    0.24 
   4  -3   1    5.32    0.32 
  -4  -3  -1    4.30    0.36 
  -4  -3  -1    5.64    0.55 
   4   3   1    5.62    0.34 
  -4   3  -1    5.35    0.40 
  -4   3  -1    5.68    0.37 
  -4   3  -1    5.31    0.38 
  -4   3  -1    4.49    0.36 
  -4   3  -1    5.40    0.57 
  -4   3  -1    3.95    0.39 
   5  -3   1   32.59    1.20 
  -5  -3  -1   32.83    1.32 
  -5  -3  -1   32.14    1.27 
  -5  -3  -1   32.76    1.10 
  -5  -3  -1   33.67    1.10 
  -5  -3  -1   30.58    1.27 
  -5  -3  -1   34.05    1.47 
  -5  -3  -1   32.89    1.30 
  -5   3  -1   31.88    1.25 
  -5   3  -1   34.81    1.30 
  -5   3  -1   30.51    1.32 
   5   3   1   33.37    1.22 
  -5   3  -1   29.19    1.45 
  -5   3  -1   32.62    1.33 
  -5   3  -1   32.34    1.27 
  -6  -3  -1    2.13    0.36 
  -6  -3  -1    2.98    0.24 
  -6  -3  -1    3.53    0.42 
   6  -3   1    3.50    0.38 
  -6  -3  -1    2.95    0.24 
  -6  -3  -1    3.77    0.48 
  -6  -3  -1    2.49    0.47 
  -6   3  -1    3.46    0.47 
  -6   3  -1    3.21    0.39 
  -6   3  -1    3.42    0.42 
  -6   3  -1    3.85    0.48 
  -6   3  -1    3.07    0.53 
  -6   3  -1    3.40    0.39 
   6   3   1    3.22    0.38 
   7  -3   1    0.39    0.19 
  -7  -3  -1    0.07    0.28 
  -7  -3  -1    0.15    0.12 
  -7  -3  -1   -0.07    0.19 
  -7  -3  -1    0.32    0.13 
  -7  -3  -1    0.03    0.18 
  -7   3  -1    0.22    0.22 
  -7   3  -1   -0.11    0.18 
  -7   3  -1    0.30    0.19 
  -7   3  -1    0.27    0.19 
   7   3   1    0.09    0.18 
  -7   3  -1    0.10    0.17 
  -7   3  -1    0.32    0.29 
  -8  -3  -1   21.76    0.90 
  -8  -3  -1   25.65    1.22 
   8  -3   1   23.00    1.10 
  -8  -3  -1   23.18    1.38 
  -8  -3  -1   22.33    1.17 
  -8  -3  -1   24.29    0.91 
  -8   3  -1   22.49    1.08 
  -8   3  -1   23.51    1.44 
  -8   3  -1   22.62    1.08 
  -8   3  -1   22.81    1.23 
   8   3   1   23.79    1.12 
  -8   3  -1   24.95    1.27 
  -8   3  -1   24.34    1.15 
   9  -3   1    9.16    0.69 
  -9  -3  -1    7.45    0.78 
  -9  -3  -1    9.29    0.74 
  -9  -3  -1    9.37    1.09 
  -9  -3  -1    8.69    0.48 
  -9  -3  -1    9.28    0.48 
  -9   3  -1    9.87    0.79 
  -9   3  -1    9.73    0.94 
  -9   3  -1    8.34    0.63 
   9   3   1    8.99    0.69 
  -9   3  -1    7.29    0.99 
  -9   3  -1    9.27    0.65 
 -10  -3  -1   19.74    0.80 
 -10  -3  -1   20.02    1.41 
  10  -3   1   18.64    1.10 
 -10  -3  -1   18.69    1.16 
 -10  -3  -1   19.39    0.80 
 -10   3  -1   20.20    1.26 
 -10   3  -1   20.07    1.00 
 -10   3  -1   18.86    0.99 
  10   3   1   19.86    1.11 
 -10   3  -1   18.22    1.19 
 -10   3  -1   20.65    1.49 
  11  -3   1    2.20    0.48 
 -11  -3  -1    2.10    0.65 
 -11  -3  -1    1.94    0.52 
  11   3   1    1.52    0.45 
  11   3   1    2.55    0.43 
 -11   3  -1    2.52    0.43 
 -11   3  -1    1.75    0.49 
 -11   3  -1    2.28    0.40 
 -11   3  -1    2.53    0.71 
  12  -3   1    9.00    0.95 
 -12  -3  -1    8.31    0.95 
 -12  -3  -1    7.38    1.12 
 -12   3  -1    9.96    1.12 
 -12   3  -1    9.81    1.10 
  12   3   1   11.37    1.08 
 -12   3  -1    8.88    1.28 
 -13  -3  -1   19.53    1.30 
 -13  -3  -1   17.87    1.83 
  13  -3   1   20.47    1.31 
 -13   3  -1   14.31    1.69 
 -13   3  -1   16.89    1.32 
  13   3   1   16.11    1.19 
 -14  -3  -1   -0.30    0.46 
  14  -3   1    0.21    0.45 
 -14  -3  -1   -0.12    0.33 
 -14   3  -1    0.15    0.52 
 -14   3  -1    0.04    0.42 
 -15  -3  -1    7.72    1.33 
 -15  -3  -1    7.77    1.01 
 -15   3  -1   11.10    1.61 
 -15   3  -1    7.89    1.10 
 -16  -3  -1    4.07    0.79 
 -16  -3  -1    3.30    1.03 
 -16   3  -1    4.27    0.88 
 -16   3  -1    6.51    1.33 
 -17  -3  -1    2.70    0.67 
 -17  -3  -1    4.69    1.17 
 -17   3  -1    4.58    0.91 
 -17   3  -1    4.53    1.21 
 -18  -3  -1    0.26    0.45 
 -18  -3  -1    0.37    0.72 
 -18   3  -1   -1.02    0.56 
 -18   3  -1   -0.10    0.45 
 -18  -4   1    0.42    0.48 
 -18  -4   1   -0.09    0.59 
 -18   4   1   -0.26    0.77 
 -18   4   1    0.23    0.52 
 -17  -4   1    1.45    0.60 
 -17  -4   1    0.93    0.79 
 -17   4   1    1.64    0.75 
 -17   4   1   -0.32    0.57 
  16  -4  -1    2.91    0.81 
 -16  -4   1    1.65    0.78 
 -16  -4   1    3.67    0.78 
 -16   4   1    1.43    0.68 
 -16   4   1    1.97    0.85 
  15  -4  -1   13.76    1.46 
 -15  -4   1   12.59    1.61 
 -15  -4   1   16.18    1.32 
 -15   4   1   17.14    1.74 
 -15   4   1   18.99    2.05 
 -14  -4   1    1.98    0.75 
 -14  -4   1    1.59    0.57 
  14  -4  -1    1.44    0.55 
  14  -4  -1    2.19    0.53 
 -14   4   1    2.44    0.73 
 -14   4   1    1.76    0.80 
  14   4  -1    3.58    0.72 
  13  -4  -1    1.24    0.43 
 -13  -4   1    0.79    0.48 
  13  -4  -1    2.48    0.61 
 -13  -4   1    0.76    0.56 
 -13   4   1    1.21    0.59 
 -13   4   1    0.35    0.54 
  13   4  -1    2.12    0.59 
  12  -4  -1   -0.25    0.27 
 -12  -4   1    0.23    0.34 
 -12  -4   1    0.43    0.46 
  12  -4  -1   -0.11    0.34 
  12   4  -1    0.75    0.43 
 -12   4   1   -0.56    0.33 
 -12   4   1    0.17    0.33 
 -12   4   1    0.48    0.60 
 -12   4   1    0.48    0.38 
 -11  -4   1    3.92    0.48 
 -11  -4   1    3.66    0.46 
 -11  -4   1    3.50    0.75 
 -11  -4   1    4.50    0.73 
  11  -4  -1    5.02    0.72 
  11   4  -1    3.24    0.61 
 -11   4   1    3.20    0.56 
 -11   4   1    5.71    1.03 
 -11   4   1    3.61    0.58 
 -11   4   1    3.82    0.71 
 -10  -4   1   17.34    1.13 
  10  -4  -1   16.58    1.06 
 -10  -4   1   16.08    0.84 
 -10  -4   1   15.04    0.82 
 -10  -4   1   14.03    1.19 
  10   4  -1   16.57    0.84 
 -10   4   1   16.54    1.04 
 -10   4   1   17.65    1.12 
 -10   4   1   17.84    1.22 
 -10   4   1   15.91    1.03 
 -10   4   1   14.23    1.46 
  10   4  -1   15.81    1.03 
  -9  -4   1    3.82    0.70 
   9  -4  -1    5.60    0.67 
  -9  -4   1    5.10    0.50 
  -9  -4   1    4.90    0.51 
  -9  -4   1    4.87    0.69 
   9   4  -1    5.26    0.64 
   9   4  -1    5.77    0.45 
  -9   4   1    6.13    0.79 
  -9   4   1    6.88    0.74 
  -9   4   1    5.79    0.72 
  -9   4   1    6.02    0.69 
  -9   4   1    5.97    0.89 
  -8  -4   1    6.92    0.50 
  -8  -4   1    6.08    0.69 
  -8  -4   1    6.39    0.48 
  -8  -4   1    6.40    0.74 
   8  -4  -1    7.14    0.81 
   8  -4  -1    6.14    0.67 
   8  -4  -1    6.87    0.79 
  -8  -4   1    5.47    0.77 
  -8   4   1    7.43    0.83 
  -8   4   1    7.24    0.73 
  -8   4   1    6.10    0.68 
  -8   4   1    6.40    0.69 
  -8   4   1    5.58    0.80 
   8   4  -1    7.28    0.46 
   8   4  -1    6.85    0.66 
   7  -4  -1   19.46    1.08 
  -7  -4   1   15.93    0.98 
  -7  -4   1   17.07    0.84 
  -7  -4   1   19.51    1.16 
  -7  -4   1   20.09    1.05 
   7  -4  -1   19.48    0.98 
  -7  -4   1   18.12    1.03 
  -7  -4   1   19.01    0.87 
   7   4  -1   17.98    0.95 
   7   4  -1   18.78    0.79 
  -7   4   1   16.84    1.04 
  -7   4   1   16.80    1.14 
  -7   4   1   19.05    1.01 
  -7   4   1   19.68    1.04 
  -7   4   1   18.42    1.01 
   6  -4  -1    6.87    0.69 
   6  -4  -1    6.99    0.52 
  -6  -4   1    7.28    0.59 
  -6  -4   1    6.16    0.44 
  -6  -4   1    5.55    0.67 
  -6  -4   1    6.26    0.62 
  -6  -4   1    6.45    0.46 
  -6   4   1    7.00    0.54 
   6   4  -1    7.10    0.39 
   6   4  -1    6.67    0.59 
  -6   4   1    7.23    0.67 
  -6   4   1    5.82    0.60 
  -6   4   1    6.15    0.64 
  -6   4   1    5.50    0.70 
  -5  -4   1   31.42    1.21 
  -5  -4   1   31.84    1.33 
  -5  -4   1   33.34    1.22 
  -5  -4   1   31.03    1.35 
  -5  -4   1   32.68    1.43 
   5  -4  -1   30.87    1.37 
   5  -4  -1   34.51    1.29 
   5   4  -1   33.13    1.12 
  -5   4   1   32.49    1.39 
   5   4  -1   32.55    1.28 
  -5   4   1   32.31    1.36 
  -5   4   1   30.41    1.45 
  -5   4   1   32.01    1.36 
  -5   4   1   30.16    1.29 
   4  -4  -1    1.20    0.28 
   4  -4  -1    1.25    0.23 
  -4  -4   1    1.18    0.20 
  -4  -4   1    0.63    0.22 
  -4  -4   1    1.08    0.24 
  -4  -4   1    1.30    0.21 
  -4  -4   1    1.01    0.29 
  -4   4   1    0.76    0.20 
   4   4  -1    1.40    0.25 
   4   4  -1    1.35    0.16 
  -4   4   1    0.76    0.24 
  -4   4   1    1.05    0.30 
   4   4  -1    1.29    0.24 
  -4   4   1    1.10    0.25 
  -4   4   1    1.10    0.25 
   3  -4  -1  652.92   19.46 
  -3  -4   1  659.11   19.34 
  -3  -4   1  659.35   19.34 
  -3  -4   1  635.78   19.45 
  -3  -4   1  638.05   19.42 
  -3  -4   1  648.21   19.47 
   3  -4  -1  647.62   19.37 
  -3   4   1  667.65   19.47 
   3   4  -1  633.36   19.41 
  -3   4   1  666.25   19.54 
  -3   4   1  658.51   19.38 
  -3   4   1  661.56   19.47 
  -3   4   1  645.79   19.46 
   3   4  -1  667.74   19.32 
   3   4  -1  672.90   19.39 
   2  -4  -1    0.60    0.16 
  -2  -4   1    0.55    0.15 
  -2  -4   1    0.43    0.11 
  -2  -4   1    0.67    0.15 
  -2  -4   1    0.71    0.13 
   2  -4  -1    0.71    0.14 
  -2   4   1    0.62    0.17 
  -2   4   1    0.26    0.14 
  -2   4   1    0.70    0.13 
   2   4  -1    0.56    0.09 
  -2   4   1    0.48    0.17 
   2   4  -1    0.66    0.15 
   2   4  -1    0.49    0.14 
  -2   4   1    0.64    0.16 
  -1  -4   1    4.11    0.22 
   1  -4  -1    3.87    0.22 
   1  -4  -1    3.71    0.24 
  -1  -4   1    3.75    0.21 
  -1  -4   1    4.21    0.23 
  -1   4   1    3.81    0.23 
   1   4  -1    3.91    0.21 
   1   4  -1    4.10    0.18 
  -1   4   1    3.91    0.24 
   1   4  -1    3.79    0.19 
  -1   4   1    3.87    0.19 
  -1   4   1    4.24    0.25 
   1   4  -1    3.79    0.21 
  -1   4   1    3.92    0.24 
   0  -4  -1   42.67    1.29 
   0  -4   1   39.76    1.29 
   0  -4   1   42.64    1.30 
   0  -4  -1   40.56    1.29 
   0  -4   1   42.34    1.30 
   0   4  -1   39.53    1.28 
   0   4  -1   41.20    1.30 
   0   4  -1   39.64    1.28 
   0   4   1   42.84    1.30 
   0   4   1   41.76    1.29 
   0   4  -1   40.75    1.29 
   0   4   1   39.56    1.28 
   0   4   1   39.51    1.23 
   0   4  -1   41.64    1.30 
  -1  -4  -1   21.88    0.71 
   1  -4   1   22.65    0.75 
  -1  -4  -1   21.93    0.73 
  -1  -4  -1   21.65    0.72 
   1  -4   1   21.60    0.74 
  -1  -4  -1   21.44    0.69 
   1   4   1   21.50    0.72 
  -1   4  -1   22.47    0.77 
  -1   4  -1   21.85    0.80 
  -1   4  -1   21.27    0.75 
  -1   4  -1   21.46    0.76 
  -1   4  -1   20.58    0.75 
   1   4   1   21.94    0.72 
   2  -4   1   41.27    1.40 
  -2  -4  -1   43.35    1.31 
  -2  -4  -1   42.51    1.36 
   2  -4   1   43.51    1.36 
  -2  -4  -1   42.41    1.46 
  -2  -4  -1   39.05    1.38 
   2   4   1   43.71    1.37 
  -2   4  -1   42.89    1.51 
  -2   4  -1   43.37    1.44 
  -2   4  -1   42.55    1.41 
  -2   4  -1   43.83    1.44 
  -2   4  -1   40.55    1.43 
   3  -4   1    9.47    0.41 
  -3  -4  -1    8.41    0.45 
  -3  -4  -1    7.85    0.32 
  -3  -4  -1    7.91    0.41 
  -3  -4  -1    9.00    0.33 
  -3  -4  -1    8.50    0.52 
   3  -4   1    8.21    0.46 
  -3   4  -1    9.21    0.44 
  -3   4  -1    8.57    0.48 
  -3   4  -1    8.21    0.46 
  -3   4  -1    9.87    0.59 
  -3   4  -1    9.26    0.49 
   3   4   1    8.14    0.41 
  -3   4  -1    8.31    0.49 
  -4  -4  -1    2.25    0.29 
  -4  -4  -1    1.77    0.24 
  -4  -4  -1    1.70    0.32 
   4  -4   1    2.04    0.23 
  -4  -4  -1    2.20    0.15 
  -4  -4  -1    2.19    0.16 
   4   4   1    2.13    0.25 
  -4   4  -1    2.35    0.27 
  -4   4  -1    2.16    0.31 
  -4   4  -1    1.99    0.29 
  -4   4  -1    2.04    0.30 
  -4   4  -1    2.30    0.31 
  -4   4  -1    2.48    0.40 
  -5  -4  -1   22.63    1.15 
  -5  -4  -1   23.82    1.04 
  -5  -4  -1   24.63    0.84 
  -5  -4  -1   21.14    0.98 
   5  -4   1   26.50    0.98 
  -5  -4  -1   23.84    0.83 
  -5   4  -1   24.66    1.10 
  -5   4  -1   24.26    1.00 
  -5   4  -1   23.56    1.22 
  -5   4  -1   23.50    1.04 
  -5   4  -1   25.66    1.10 
  -5   4  -1   23.56    1.04 
   5   4   1   23.52    0.97 
  -6  -4  -1   29.32    1.27 
  -6  -4  -1   28.58    1.03 
  -6  -4  -1   29.84    1.25 
  -6  -4  -1   30.16    1.28 
   6  -4   1   29.33    1.18 
  -6  -4  -1   30.57    1.03 
  -6  -4  -1   28.40    1.42 
  -6   4  -1   28.62    1.25 
  -6   4  -1   30.79    1.34 
  -6   4  -1   25.30    1.42 
   6   4   1   30.32    1.20 
  -6   4  -1   30.53    1.23 
  -6   4  -1   30.28    1.34 
  -6   4  -1   30.20    1.26 
  -7  -4  -1    1.61    0.20 
  -7  -4  -1    2.53    0.39 
   7  -4   1    2.12    0.34 
  -7  -4  -1    2.65    0.42 
  -7  -4  -1    1.81    0.22 
  -7  -4  -1    1.76    0.45 
  -7   4  -1    2.16    0.37 
  -7   4  -1    1.74    0.47 
  -7   4  -1    1.80    0.35 
  -7   4  -1    1.82    0.34 
  -7   4  -1    2.04    0.41 
  -7   4  -1    1.58    0.37 
   7   4   1    2.50    0.36 
  -8  -4  -1    1.69    0.23 
  -8  -4  -1    1.18    0.36 
  -8  -4  -1    0.58    0.34 
  -8  -4  -1    1.66    0.39 
   8  -4   1    1.48    0.32 
  -8  -4  -1    1.62    0.22 
  -8   4  -1    2.16    0.58 
  -8   4  -1    1.70    0.42 
  -8   4  -1    1.91    0.37 
  -8   4  -1    1.27    0.32 
  -8   4  -1    2.10    0.38 
  -8   4  -1    1.53    0.40 
  -9  -4  -1    5.89    0.70 
  -9  -4  -1    5.55    0.86 
  -9  -4  -1    5.93    0.37 
  -9  -4  -1    5.23    0.65 
  -9  -4  -1    6.06    0.36 
   9  -4   1    5.82    0.62 
  -9   4  -1    6.60    0.76 
  -9   4  -1    6.34    0.64 
  -9   4  -1    6.18    0.63 
  -9   4  -1    4.69    0.66 
   9   4   1    7.12    0.69 
  -9   4  -1    5.36    0.87 
 -10  -4  -1   11.30    0.52 
 -10  -4  -1    9.34    0.91 
 -10  -4  -1   12.08    1.27 
  10  -4   1   10.98    0.82 
 -10  -4  -1   10.93    0.53 
 -10   4  -1   12.25    0.96 
 -10   4  -1   12.89    1.39 
  10   4   1   11.69    0.83 
  10   4   1   10.40    0.60 
 -10   4  -1   10.04    0.74 
 -10   4  -1   11.03    1.08 
 -10   4  -1   11.19    0.75 
  11  -4   1   28.24    1.47 
 -11  -4  -1   29.03    1.53 
 -11  -4  -1   25.77    1.73 
 -11   4  -1   26.63    1.28 
 -11   4  -1   28.77    1.88 
 -11   4  -1   27.25    1.30 
  11   4   1   31.21    1.51 
 -11   4  -1   27.97    1.57 
 -11   4  -1   29.54    1.66 
 -12  -4  -1    0.69    0.42 
  12  -4   1    1.10    0.44 
 -12  -4  -1    0.06    0.41 
  12   4   1    1.51    0.49 
 -12   4  -1    0.83    0.60 
 -12   4  -1    1.10    0.49 
 -12   4  -1    0.52    0.38 
  13  -4   1    1.60    0.51 
 -13  -4  -1    0.89    0.56 
 -13  -4  -1    1.05    0.46 
 -13   4  -1    0.65    0.60 
 -13   4  -1    1.47    0.55 
 -13   4  -1    0.71    0.47 
  13   4   1    0.46    0.39 
 -14  -4  -1    2.99    0.63 
  14  -4   1    3.29    0.70 
 -14  -4  -1    3.27    0.85 
 -14   4  -1    3.07    0.77 
 -14   4  -1    2.39    0.83 
 -15  -4  -1    0.56    0.67 
 -15  -4  -1    0.49    0.42 
 -15   4  -1    0.46    0.61 
 -15   4  -1    1.10    0.55 
 -16  -4  -1    0.59    0.66 
 -16  -4  -1    0.37    0.40 
 -16   4  -1    0.08    0.48 
 -16   4  -1   -0.80    0.53 
 -17  -4  -1    0.89    0.74 
 -17  -4  -1    1.97    0.60 
 -17   4  -1    3.50    0.87 
 -17   4  -1    1.88    0.80 
 -18  -4  -1    1.39    0.84 
 -18  -4  -1    1.97    0.59 
 -18   4  -1    2.85    1.04 
 -18  -5   1   -0.23    0.60 
 -18  -5   1    0.70    0.55 
 -18   5   1    0.23    0.57 
 -18   5   1   -0.46    0.65 
 -17  -5   1    1.58    0.78 
 -17  -5   1    1.23    0.57 
 -17   5   1    2.34    0.78 
 -17   5   1    3.61    1.07 
  16  -5  -1    4.51    0.90 
 -16  -5   1    4.36    0.83 
 -16  -5   1    4.43    1.06 
 -16   5   1    4.56    1.14 
 -16   5   1    4.10    0.94 
 -15  -5   1    0.29    0.52 
 -15  -5   1   -0.23    0.35 
  15  -5  -1    0.42    0.48 
 -15   5   1   -0.90    0.48 
 -15   5   1   -0.38    0.38 
  14  -5  -1    3.35    0.75 
  14  -5  -1    2.69    0.58 
 -14  -5   1    1.81    0.70 
 -14  -5   1    0.84    0.47 
  14   5  -1    3.07    0.68 
 -14   5   1    1.44    0.60 
 -14   5   1    1.84    0.78 
 -13  -5   1    1.63    0.55 
 -13  -5   1    3.32    0.82 
  13  -5  -1    1.62    0.51 
  13  -5  -1    3.83    0.61 
 -13   5   1    3.73    0.94 
  13   5  -1    1.57    0.54 
 -13   5   1    2.00    0.65 
 -13   5   1    2.75    0.56 
  12  -5  -1   16.63    1.21 
 -12  -5   1   15.41    1.58 
 -12  -5   1   17.17    1.22 
 -12   5   1   17.92    1.82 
  12   5  -1   17.49    1.19 
 -12   5   1   17.83    1.14 
 -12   5   1   13.34    1.38 
 -12   5   1   18.03    1.15 
 -11  -5   1   29.65    1.86 
  11  -5  -1   30.92    1.63 
 -11  -5   1   33.67    1.71 
 -11  -5   1   29.63    1.28 
 -11  -5   1   30.22    1.29 
 -11   5   1   30.97    1.80 
  11   5  -1   34.65    1.66 
 -11   5   1   33.52    1.62 
 -11   5   1   30.12    1.64 
 -11   5   1   29.62    1.56 
 -11   5   1   32.49    2.02 
 -10  -5   1    5.14    0.51 
  10  -5  -1    4.69    0.67 
 -10  -5   1    3.18    0.70 
 -10  -5   1    3.43    0.60 
 -10  -5   1    4.80    0.49 
 -10   5   1    6.16    0.75 
 -10   5   1    3.61    0.59 
  10   5  -1    5.79    0.47 
 -10   5   1    4.43    0.68 
  10   5  -1    3.95    0.63 
 -10   5   1    2.49    0.58 
 -10   5   1    3.54    0.78 
  -9  -5   1   50.71    1.85 
   9  -5  -1   52.33    2.12 
  -9  -5   1   50.46    2.15 
  -9  -5   1   45.93    2.30 
  -9  -5   1   50.68    1.86 
  -9   5   1   49.17    2.25 
  -9   5   1   52.85    2.15 
  -9   5   1   49.22    2.43 
   9   5  -1   50.14    2.07 
  -9   5   1   51.39    2.16 
   9   5  -1   52.76    1.83 
  -9   5   1   50.23    2.12 
  -8  -5   1    0.20    0.31 
  -8  -5   1    0.40    0.19 
   8  -5  -1    0.38    0.26 
  -8  -5   1    0.17    0.18 
  -8  -5   1    0.07    0.25 
  -8  -5   1    0.22    0.25 
  -8  -5   1    0.10    0.26 
   8  -5  -1   -0.12    0.25 
  -8   5   1   -0.29    0.21 
  -8   5   1   -0.24    0.24 
  -8   5   1   -0.30    0.25 
  -8   5   1   -0.11    0.23 
   8   5  -1   -0.09    0.20 
  -8   5   1    0.11    0.24 
   8   5  -1    0.24    0.16 
  -7  -5   1    6.40    0.45 
  -7  -5   1    5.21    0.70 
   7  -5  -1    7.70    0.80 
  -7  -5   1    4.49    0.60 
  -7  -5   1    6.71    0.46 
   7  -5  -1    6.52    0.62 
  -7  -5   1    5.03    0.58 
  -7   5   1    6.59    0.68 
  -7   5   1    6.34    0.69 
   7   5  -1    6.12    0.60 
  -7   5   1    6.16    0.72 
  -7   5   1    7.07    0.69 
  -7   5   1    6.33    0.81 
   7   5  -1    6.48    0.40 
  -6  -5   1   37.94    1.68 
  -6  -5   1   38.46    1.40 
   6  -5  -1   37.66    1.49 
  -6  -5   1   35.47    1.38 
   6  -5  -1   35.79    1.60 
  -6  -5   1   36.88    1.59 
  -6  -5   1   36.48    1.55 
   6   5  -1   38.78    1.51 
   6   5  -1   39.27    1.31 
  -6   5   1   33.25    1.58 
  -6   5   1   37.87    1.60 
  -6   5   1   38.84    1.76 
  -6   5   1   39.16    1.61 
  -6   5   1   37.22    1.53 
   5  -5  -1   77.01    2.70 
  -5  -5   1   77.71    2.64 
  -5  -5   1   74.72    2.48 
  -5  -5   1   76.86    2.49 
  -5  -5   1   75.33    2.67 
  -5  -5   1   78.07    2.76 
   5  -5  -1   70.23    2.55 
  -5   5   1   73.22    2.69 
  -5   5   1   74.65    2.61 
   5   5  -1   77.64    2.39 
   5   5  -1   74.68    2.57 
  -5   5   1   75.83    2.69 
  -5   5   1   77.91    2.83 
  -5   5   1   76.76    2.69 
  -4  -5   1    5.98    0.48 
   4  -5  -1    5.88    0.48 
  -4  -5   1    5.31    0.44 
  -4  -5   1    5.40    0.42 
  -4  -5   1    6.01    0.37 
  -4  -5   1    5.88    0.36 
   4  -5  -1    5.82    0.41 
  -4   5   1    5.95    0.41 
  -4   5   1    6.17    0.49 
   4   5  -1    5.10    0.28 
  -4   5   1    5.31    0.50 
  -4   5   1    5.76    0.47 
   4   5  -1    5.43    0.40 
  -4   5   1    6.00    0.60 
   4   5  -1    5.61    0.42 
   3  -5  -1   49.21    1.73 
  -3  -5   1   45.62    1.71 
  -3  -5   1   48.59    1.61 
   3  -5  -1   49.76    1.66 
  -3  -5   1   46.78    1.60 
  -3  -5   1   46.74    1.67 
  -3   5   1   50.77    1.74 
   3   5  -1   50.30    1.66 
  -3   5   1   46.21    1.72 
  -3   5   1   47.13    1.72 
  -3   5   1   48.45    1.65 
  -3   5   1   50.46    1.81 
   3   5  -1   46.04    1.66 
   3   5  -1   49.30    1.51 
  -2  -5   1   84.80    2.69 
  -2  -5   1   83.27    2.64 
  -2  -5   1   84.64    2.71 
  -2  -5   1   83.11    2.64 
   2  -5  -1   88.02    2.73 
   2  -5  -1   87.42    2.68 
  -2   5   1   84.73    2.73 
   2   5  -1   83.49    2.56 
   2   5  -1   82.45    2.66 
  -2   5   1   84.86    2.73 
  -2   5   1   85.28    2.65 
  -2   5   1   83.77    2.75 
   2   5  -1   85.35    2.69 
  -2   5   1   87.56    2.74 
  -1  -5   1    4.68    0.26 
  -1  -5   1    5.11    0.27 
   1  -5  -1    4.69    0.28 
  -1  -5   1    5.05    0.28 
   1  -5  -1    4.84    0.27 
  -1   5   1    4.80    0.23 
  -1   5   1    4.96    0.29 
  -1   5   1    5.12    0.30 
   1   5  -1    4.70    0.26 
  -1   5   1    4.88    0.29 
   1   5  -1    4.98    0.28 
  -1   5   1    5.23    0.29 
   1   5  -1    4.69    0.26 
   1   5  -1    4.95    0.24 
   1   5  -1    4.97    0.22 
   0  -5   1    7.39    0.33 
   0  -5   1    7.78    0.34 
   0  -5  -1    7.91    0.34 
   0  -5  -1    7.57    0.33 
   0  -5   1    7.64    0.33 
   0  -5   1    7.43    0.33 
   0   5  -1    7.48    0.33 
   0   5  -1    7.73    0.31 
   0   5   1    7.90    0.28 
   0   5  -1    7.52    0.32 
   0   5  -1    7.88    0.34 
   0   5   1    7.74    0.33 
   0   5   1    8.10    0.34 
   0   5  -1    7.75    0.33 
   0   5   1    7.44    0.33 
   1  -5   1   35.95    1.21 
  -1  -5  -1   37.14    1.19 
   1  -5   1   36.37    1.21 
  -1  -5  -1   36.86    1.20 
  -1  -5  -1   38.33    1.18 
  -1   5  -1   36.80    1.22 
   1   5   1   37.87    1.19 
  -1   5  -1   36.51    1.23 
  -1   5  -1   37.58    1.27 
  -1   5  -1   37.44    1.23 
  -1   5  -1   36.44    1.23 
   1   5   1   38.80    1.19 
  -2  -5  -1   29.36    1.00 
  -2  -5  -1   29.03    1.02 
   2  -5   1   30.00    1.01 
   2  -5   1   30.06    1.05 
  -2  -5  -1   30.23    0.96 
  -2  -5  -1   29.45    1.09 
   2   5   1   30.40    1.01 
  -2   5  -1   29.87    1.05 
  -2   5  -1   29.25    1.07 
  -2   5  -1   29.13    1.07 
  -2   5  -1   29.71    1.07 
  -2   5  -1   29.95    1.14 
  -3  -5  -1   57.71    1.73 
   3  -5   1   55.14    1.88 
  -3  -5  -1   54.97    1.95 
  -3  -5  -1   55.31    1.82 
  -3  -5  -1   57.19    1.73 
  -3  -5  -1   55.83    1.72 
   3  -5   1   57.19    1.81 
  -3  -5  -1   52.45    1.85 
  -3   5  -1   55.81    1.91 
  -3   5  -1   56.61    2.03 
  -3   5  -1   56.70    1.91 
  -3   5  -1   55.67    1.89 
  -3   5  -1   53.62    1.90 
   3   5   1   54.94    1.81 
   4  -5   1   17.34    0.72 
  -4  -5  -1   18.66    0.81 
  -4  -5  -1   17.22    0.61 
  -4  -5  -1   17.03    0.87 
  -4  -5  -1   17.38    0.62 
   4  -5   1   18.54    0.82 
  -4  -5  -1   17.70    0.75 
   4   5   1   17.60    0.74 
  -4   5  -1   16.99    0.81 
  -4   5  -1   17.62    0.94 
  -4   5  -1   17.47    0.82 
  -4   5  -1   18.32    0.83 
  -4   5  -1   15.91    0.80 
  -4   5  -1   18.51    0.76 
  -5  -5  -1   43.51    1.41 
  -5  -5  -1   44.02    1.80 
   5  -5   1   44.71    1.56 
  -5  -5  -1   41.54    1.58 
   5  -5   1   42.46    1.68 
  -5  -5  -1   42.72    1.41 
  -5  -5  -1   45.44    1.66 
  -5   5  -1   44.15    1.67 
  -5   5  -1   41.35    1.67 
  -5   5  -1   41.25    1.65 
  -5   5  -1   46.60    1.90 
  -5   5  -1   45.03    1.60 
  -5   5  -1   43.55    1.70 
   5   5   1   45.32    1.57 
   6  -5   1    0.22    0.17 
  -6  -5  -1   -0.04    0.16 
  -6  -5  -1    0.27    0.21 
  -6  -5  -1   -0.01    0.09 
  -6  -5  -1    0.16    0.10 
  -6  -5  -1   -0.06    0.23 
   6   5   1   -0.02    0.16 
  -6   5  -1    0.36    0.30 
  -6   5  -1    0.34    0.23 
  -6   5  -1    0.03    0.19 
  -6   5  -1    0.22    0.19 
  -6   5  -1    0.28    0.21 
  -6   5  -1   -0.24    0.16 
  -7  -5  -1    0.04    0.19 
  -7  -5  -1   -0.02    0.15 
  -7  -5  -1    0.14    0.26 
   7  -5   1    0.09    0.17 
  -7  -5  -1   -0.08    0.09 
  -7  -5  -1   -0.06    0.09 
  -7  -5  -1   -0.18    0.16 
  -7   5  -1    0.17    0.19 
   7   5   1   -0.08    0.17 
  -7   5  -1    0.14    0.17 
  -7   5  -1    0.01    0.26 
  -7   5  -1   -0.16    0.16 
  -7   5  -1   -0.05    0.19 
  -7   5  -1   -0.23    0.17 
  -8  -5  -1   81.05    2.85 
  -8  -5  -1   77.04    2.88 
   8  -5   1   76.15    2.77 
  -8  -5  -1   72.68    3.08 
  -8  -5  -1   76.55    2.48 
  -8  -5  -1   76.72    2.49 
  -8   5  -1   80.40    3.00 
  -8   5  -1   79.05    2.83 
   8   5   1   79.40    2.53 
  -8   5  -1   78.60    2.96 
  -8   5  -1   74.41    3.20 
  -8   5  -1   84.00    2.83 
   8   5   1   83.15    2.81 
  -8   5  -1   78.04    2.82 
   9  -5   1    2.05    0.42 
  -9  -5  -1    1.69    0.41 
  -9  -5  -1    1.65    0.21 
  -9  -5  -1    1.20    0.50 
  -9  -5  -1    1.89    0.22 
  -9  -5  -1    1.59    0.38 
   9   5   1    1.64    0.37 
  -9   5  -1    0.99    0.38 
  -9   5  -1    1.12    0.41 
  -9   5  -1    1.22    0.34 
   9   5   1    1.39    0.25 
  -9   5  -1    1.66    0.38 
  -9   5  -1    1.34    0.48 
 -10  -5  -1   16.61    1.04 
  10  -5   1   15.30    0.99 
 -10  -5  -1   19.83    1.35 
 -10  -5  -1   14.82    0.66 
 -10   5  -1   15.31    1.50 
 -10   5  -1   16.28    0.96 
  10   5   1   16.62    1.02 
 -10   5  -1   16.12    1.12 
 -10   5  -1   17.31    1.17 
 -10   5  -1   15.66    0.95 
 -11  -5  -1    4.70    0.69 
 -11  -5  -1    4.00    0.81 
  11  -5   1    4.37    0.66 
 -11   5  -1    3.92    0.88 
 -11   5  -1    5.61    0.65 
  11   5   1    5.85    0.74 
 -11   5  -1    3.83    0.55 
 -11   5  -1    4.33    0.72 
 -11   5  -1    6.14    0.84 
 -12  -5  -1    9.83    1.01 
 -12  -5  -1   11.09    1.35 
  12  -5   1   11.73    1.11 
 -12   5  -1   12.08    1.23 
 -12   5  -1    9.68    1.10 
 -12   5  -1   11.97    1.49 
  12   5   1   11.40    1.07 
 -13  -5  -1   17.27    1.74 
  13  -5   1   18.98    1.28 
 -13  -5  -1   16.05    1.18 
 -13   5  -1   18.83    1.94 
 -13   5  -1   13.99    1.40 
 -13   5  -1   17.03    1.32 
  14  -5   1    0.62    0.43 
 -14  -5  -1    0.20    0.32 
 -14  -5  -1    0.17    0.47 
 -14   5  -1    0.27    0.55 
 -14   5  -1   -0.26    0.37 
 -15  -5  -1    4.36    1.04 
 -15  -5  -1    4.75    0.79 
 -15   5  -1    5.22    1.15 
 -15   5  -1    3.17    0.81 
 -16  -5  -1    0.35    0.43 
 -16  -5  -1    0.95    0.75 
 -16   5  -1    1.57    0.94 
 -16   5  -1    0.52    0.57 
 -17  -5  -1    1.40    0.53 
 -17  -5  -1    1.29    0.78 
 -17   5  -1    1.45    0.83 
 -17   5  -1    0.75    0.59 
 -18  -5  -1    0.30    0.41 
 -18  -5  -1    0.16    0.61 
 -18   5  -1   -0.02    0.71 
 -18   5  -1    0.04    0.56 
 -18  -6   1   -0.43    0.41 
 -18  -6   1    0.03    0.68 
 -18   6   1    0.35    0.61 
 -18   6   1   -0.12    0.70 
 -17  -6   1    0.46    0.49 
 -17  -6   1    0.17    0.59 
 -17   6   1    0.43    0.59 
 -17   6   1   -0.46    0.53 
 -16  -6   1    0.34    0.55 
  16  -6  -1    0.45    0.57 
 -16  -6   1    0.25    0.43 
 -16   6   1    0.18    0.63 
 -16   6   1    0.88    0.51 
  15  -6  -1    7.94    0.97 
 -15  -6   1    5.96    0.92 
  15  -6  -1    7.48    1.11 
 -15  -6   1    8.06    1.31 
 -15   6   1    8.21    1.21 
 -15   6   1    8.08    1.41 
 -14  -6   1    5.78    0.88 
  14  -6  -1    5.37    0.78 
 -14  -6   1    5.82    1.09 
  14  -6  -1    5.17    0.85 
  14   6  -1    5.41    0.87 
 -14   6   1    4.42    0.88 
 -14   6   1    8.61    1.42 
 -13  -6   1    2.75    0.78 
  13  -6  -1    2.26    0.52 
 -13  -6   1    1.71    0.55 
  13  -6  -1    3.08    0.69 
  13   6  -1    2.65    0.64 
 -13   6   1    1.28    0.66 
 -13   6   1    2.85    0.76 
 -13   6   1    2.82    0.58 
 -12  -6   1    0.50    0.50 
  12  -6  -1   -0.11    0.34 
 -12  -6   1    0.12    0.32 
 -12   6   1   -0.20    0.32 
 -12   6   1    0.30    0.36 
 -12   6   1   -0.16    0.32 
 -12   6   1    0.33    0.53 
 -12   6   1   -0.07    0.38 
  12   6  -1    0.14    0.37 
 -11  -6   1   22.90    1.01 
 -11  -6   1   20.91    0.98 
  11  -6  -1   21.21    1.33 
 -11  -6   1   20.86    1.53 
 -11  -6   1   21.56    1.34 
 -11   6   1   22.26    1.38 
  11   6  -1   21.94    1.31 
 -11   6   1   20.55    1.28 
 -11   6   1   22.49    1.31 
 -11   6   1   20.82    1.62 
 -11   6   1   22.49    1.50 
 -10  -6   1   38.26    1.49 
  10  -6  -1   40.27    1.83 
 -10  -6   1   38.83    1.50 
 -10  -6   1   37.95    1.83 
 -10  -6   1   39.78    2.07 
 -10   6   1   36.84    1.79 
 -10   6   1   37.59    1.82 
 -10   6   1   36.72    2.13 
  10   6  -1   40.70    1.81 
 -10   6   1   39.43    1.84 
 -10   6   1   39.35    1.99 
  -9  -6   1    1.42    0.47 
   9  -6  -1    2.14    0.44 
  -9  -6   1    2.19    0.33 
  -9  -6   1    1.48    0.28 
  -9  -6   1    1.34    0.39 
  -9   6   1    2.22    0.47 
  -9   6   1    2.16    0.49 
  -9   6   1    2.33    0.61 
   9   6  -1    1.81    0.30 
   9   6  -1    3.31    0.53 
  -9   6   1    1.73    0.49 
  -9   6   1    1.97    0.46 
  -8  -6   1   58.36    2.30 
   8  -6  -1   56.11    2.23 
  -8  -6   1   56.91    2.02 
  -8  -6   1   58.77    2.04 
  -8  -6   1   53.97    2.31 
  -8  -6   1   51.90    2.30 
   8  -6  -1   60.03    2.44 
  -8  -6   1   55.96    2.46 
   8   6  -1   60.27    1.98 
  -8   6   1   60.26    2.32 
   8   6  -1   57.36    2.23 
  -8   6   1   56.83    2.41 
  -8   6   1   58.65    2.60 
  -8   6   1   57.26    2.33 
  -8   6   1   62.08    2.37 
   7  -6  -1    3.74    0.55 
   7  -6  -1    4.87    0.54 
  -7  -6   1    3.81    0.52 
  -7  -6   1    4.74    0.65 
  -7  -6   1    3.66    0.55 
  -7  -6   1    4.01    0.41 
  -7  -6   1    3.96    0.40 
  -7   6   1    5.02    0.72 
  -7   6   1    4.64    0.59 
   7   6  -1    3.73    0.30 
  -7   6   1    4.39    0.58 
  -7   6   1    4.72    0.62 
  -7   6   1    4.97    0.59 
   7   6  -1    4.15    0.50 
  -6  -6   1    1.99    0.42 
  -6  -6   1    1.61    0.37 
  -6  -6   1    1.98    0.28 
   6  -6  -1    1.60    0.37 
   6  -6  -1    1.65    0.32 
  -6  -6   1    1.80    0.36 
  -6  -6   1    1.61    0.25 
  -6   6   1    1.85    0.39 
  -6   6   1    1.87    0.36 
  -6   6   1    2.26    0.48 
   6   6  -1    1.87    0.22 
  -6   6   1    2.08    0.40 
  -6   6   1    1.79    0.37 
   6   6  -1    1.41    0.30 
  -5  -6   1    0.84    0.28 
   5  -6  -1    1.33    0.26 
  -5  -6   1    0.51    0.22 
   5  -6  -1    0.99    0.28 
  -5  -6   1    0.69    0.26 
  -5  -6   1    0.91    0.20 
  -5  -6   1    0.65    0.18 
  -5   6   1    1.43    0.32 
   5   6  -1    1.47    0.18 
  -5   6   1    1.27    0.36 
  -5   6   1    0.82    0.28 
  -5   6   1    1.69    0.36 
  -5   6   1    0.78    0.24 
   5   6  -1    1.14    0.26 
  -4  -6   1  100.84    3.13 
  -4  -6   1   99.73    3.33 
   4  -6  -1   97.05    3.20 
  -4  -6   1   98.72    3.13 
  -4  -6   1  100.42    3.30 
  -4  -6   1   98.42    3.24 
   4  -6  -1   96.43    3.30 
  -4   6   1  100.52    3.42 
  -4   6   1   98.42    3.23 
   4   6  -1   97.82    3.23 
  -4   6   1  102.21    3.34 
   4   6  -1  100.21    3.01 
  -4   6   1  101.15    3.33 
  -4   6   1   95.88    3.31 
   4   6  -1   98.00    3.20 
  -3  -6   1   35.08    1.39 
   3  -6  -1   38.28    1.35 
  -3  -6   1   39.60    1.38 
   3  -6  -1   38.26    1.43 
  -3  -6   1   37.07    1.29 
  -3  -6   1   38.29    1.30 
  -3   6   1   34.65    1.45 
   3   6  -1   37.46    1.34 
  -3   6   1   37.31    1.43 
   3   6  -1   38.52    1.37 
  -3   6   1   37.63    1.43 
   3   6  -1   36.94    1.19 
  -3   6   1   39.63    1.45 
  -3   6   1   38.04    1.35 
  -2  -6   1  334.61   10.28 
   2  -6  -1  333.40   10.37 
  -2  -6   1  354.99   10.29 
   2  -6  -1  357.16   10.33 
  -2  -6   1  347.45   10.33 
  -2   6   1  352.07   10.42 
  -2   6   1  355.85   10.30 
  -2   6   1  343.14   10.39 
  -2   6   1  339.28   10.38 
  -2   6   1  346.57   10.39 
   2   6  -1  351.12   10.31 
   2   6  -1  345.88   10.20 
   2   6  -1  335.33   10.33 
   1  -6  -1  179.39    5.23 
  -1  -6   1  172.74    5.18 
  -1  -6   1  164.82    5.16 
  -1  -6   1  167.65    5.19 
   1  -6  -1  172.39    5.19 
  -1   6   1  174.40    5.22 
  -1   6   1  167.63    5.21 
   1   6  -1  167.17    5.11 
  -1   6   1  176.62    5.22 
   1   6  -1  173.63    5.20 
   1   6  -1  168.79    5.17 
   1   6  -1  171.79    5.18 
  -1   6   1  174.99    5.14 
   1   6  -1  171.59    5.14 
  -1   6   1  175.30    5.23 
   0  -6   1    9.10    0.38 
   0  -6   1    8.54    0.38 
   0  -6   1    9.05    0.37 
   0  -6  -1    8.53    0.38 
   0  -6  -1    8.19    0.37 
   0  -6   1    8.06    0.37 
   0   6  -1    8.42    0.36 
   0   6   1    8.87    0.37 
   0   6   1    8.18    0.36 
   0   6   1    8.21    0.38 
   0   6  -1    8.61    0.35 
   0   6  -1    8.40    0.37 
   0   6  -1    8.58    0.38 
   0   6   1    8.28    0.31 
   0   6  -1    9.00    0.39 
   1  -6   1   46.54    1.52 
  -1  -6  -1   47.86    1.52 
  -1  -6  -1   45.69    1.49 
   1  -6   1   45.52    1.53 
  -1  -6  -1   46.68    1.50 
   1   6   1   45.65    1.50 
   1   6   1   47.54    1.50 
   1   6   1   45.42    1.49 
  -1   6  -1   50.76    1.60 
  -1   6  -1   48.86    1.54 
  -1   6  -1   48.50    1.55 
  -1   6  -1   45.88    1.53 
  -1   6  -1   48.45    1.55 
  -2  -6  -1   31.36    1.07 
   2  -6   1   30.03    1.08 
  -2  -6  -1   30.76    1.03 
  -2  -6  -1   28.79    0.99 
  -2  -6  -1   31.38    1.12 
  -2  -6  -1   30.52    0.93 
   2  -6   1   30.12    1.05 
  -2   6  -1   31.38    1.11 
   2   6   1   29.51    1.03 
   2   6   1   29.66    1.03 
  -2   6  -1   33.13    1.13 
  -2   6  -1   29.33    1.10 
  -2   6  -1   29.75    1.09 
  -2   6  -1   29.87    1.17 
  -3  -6  -1  317.44    9.25 
   3  -6   1  318.61    9.34 
  -3  -6  -1  307.41    9.33 
  -3  -6  -1  307.83    9.47 
  -3  -6  -1  320.45    9.25 
  -3  -6  -1  299.00    9.38 
   3  -6   1  316.27    9.42 
  -3   6  -1  323.51    9.46 
  -3   6  -1  314.40    9.44 
  -3   6  -1  316.31    9.57 
  -3   6  -1  303.87    9.44 
  -3   6  -1  305.63    9.42 
   3   6   1  309.29    9.33 
  -4  -6  -1   -0.08    0.11 
  -4  -6  -1    0.16    0.12 
  -4  -6  -1   -0.01    0.05 
   4  -6   1    0.04    0.11 
   4  -6   1   -0.07    0.14 
  -4  -6  -1   -0.06    0.05 
  -4  -6  -1    0.12    0.17 
  -4  -6  -1    0.04    0.06 
  -4   6  -1    0.03    0.17 
  -4   6  -1   -0.08    0.13 
  -4   6  -1    0.02    0.13 
  -4   6  -1    0.11    0.16 
   4   6   1    0.11    0.11 
  -4   6  -1    0.10    0.13 
  -5  -6  -1   29.48    1.32 
  -5  -6  -1   29.13    1.21 
  -5  -6  -1   27.52    1.13 
   5  -6   1   29.17    1.23 
  -5  -6  -1   27.77    0.96 
   5  -6   1   28.99    1.12 
  -5  -6  -1   27.94    0.96 
  -5   6  -1   28.10    1.38 
   5   6   1   28.22    0.92 
  -5   6  -1   27.01    1.22 
  -5   6  -1   29.21    1.24 
  -5   6  -1   27.73    1.23 
   5   6   1   28.73    1.12 
  -5   6  -1   29.27    1.15 
  -5   6  -1   29.22    1.25 
  -6  -6  -1   54.62    1.78 
  -6  -6  -1   53.70    2.08 
  -6  -6  -1   57.08    2.26 
  -6  -6  -1   54.81    2.02 
   6  -6   1   58.77    2.18 
  -6  -6  -1   55.03    1.79 
   6  -6   1   55.97    1.99 
   6   6   1   56.38    1.76 
  -6   6  -1   59.22    2.13 
   6   6   1   56.51    2.00 
  -6   6  -1   58.90    2.03 
  -6   6  -1   54.92    2.14 
  -6   6  -1   54.16    2.13 
  -6   6  -1   55.87    2.35 
  -6   6  -1   51.91    2.08 
  -7  -6  -1   31.03    1.06 
   7  -6   1   30.17    1.29 
  -7  -6  -1   29.49    1.05 
  -7  -6  -1   30.23    1.32 
  -7  -6  -1   31.82    1.56 
  -7  -6  -1   30.79    1.39 
  -7   6  -1   29.74    1.63 
  -7   6  -1   29.54    1.37 
  -7   6  -1   28.86    1.28 
   7   6   1   32.00    1.07 
  -7   6  -1   30.80    1.45 
  -7   6  -1   30.85    1.43 
   7   6   1   31.34    1.30 
  -7   6  -1   30.46    1.38 
  -8  -6  -1   10.91    0.75 
  -8  -6  -1   10.78    0.49 
   8  -6   1   12.42    0.75 
  -8  -6  -1    9.82    1.01 
  -8  -6  -1   10.32    0.78 
  -8  -6  -1    9.03    0.75 
  -8  -6  -1   11.41    0.49 
  -8   6  -1   10.00    0.80 
  -8   6  -1   11.54    0.78 
  -8   6  -1   10.77    1.15 
  -8   6  -1   12.32    0.80 
   8   6   1   10.88    0.52 
  -8   6  -1   10.19    0.70 
  -8   6  -1   11.68    0.87 
   8   6   1   10.36    0.71 
   9  -6   1    0.61    0.29 
  -9  -6  -1    0.87    0.32 
  -9  -6  -1    0.48    0.13 
  -9  -6  -1    0.83    0.16 
  -9  -6  -1    0.62    0.39 
  -9   6  -1    0.31    0.31 
   9   6   1   -0.06    0.16 
  -9   6  -1    0.48    0.30 
  -9   6  -1    0.94    0.44 
   9   6   1    0.24    0.24 
  -9   6  -1    0.49    0.32 
  -9   6  -1    0.58    0.31 
 -10  -6  -1    2.85    0.66 
 -10  -6  -1    2.63    0.51 
  10  -6   1    3.15    0.55 
  10   6   1    2.13    0.47 
 -10   6  -1    2.81    0.50 
 -10   6  -1    3.15    0.73 
 -10   6  -1    3.39    0.52 
 -10   6  -1    2.16    0.54 
 -10   6  -1    2.21    0.52 
 -11  -6  -1    7.31    1.04 
 -11  -6  -1    7.08    0.80 
  11  -6   1    6.15    0.78 
 -11   6  -1    7.04    0.91 
 -11   6  -1    4.62    0.92 
 -11   6  -1    7.73    0.79 
 -11   6  -1    6.90    0.94 
  11   6   1    8.36    0.85 
 -11   6  -1    6.74    0.73 
 -12  -6  -1   14.65    1.50 
  12  -6   1   13.27    1.03 
 -12  -6  -1   10.05    1.02 
 -12   6  -1   11.06    1.46 
 -12   6  -1   11.03    1.21 
 -12   6  -1   12.58    1.26 
  12   6   1   10.33    1.04 
 -13  -6  -1    3.07    0.62 
 -13  -6  -1    2.85    0.79 
  13  -6   1    3.82    0.72 
 -13   6  -1    3.63    0.75 
 -13   6  -1    4.08    0.80 
 -13   6  -1    4.06    0.99 
  14  -6   1    3.65    0.75 
 -14  -6  -1    4.07    0.70 
 -14  -6  -1    2.79    0.81 
 -14   6  -1    2.94    0.71 
 -14   6  -1    3.18    0.93 
 -14   6  -1    3.89    0.80 
  15  -6   1   -0.38    0.40 
 -15  -6  -1   -0.31    0.30 
 -15  -6  -1   -0.17    0.52 
  15  -6   1   -0.09    0.38 
 -15   6  -1    0.59    0.62 
 -15   6  -1   -0.19    0.38 
 -16  -6  -1    3.91    1.00 
 -16  -6  -1    4.57    0.80 
 -16   6  -1    4.62    1.20 
 -16   6  -1    4.79    0.98 
 -17  -6  -1    5.11    1.22 
 -17  -6  -1    4.77    0.78 
 -17   6  -1    5.57    1.31 
 -17   6  -1    4.55    1.00 
 -18  -6  -1    2.07    0.86 
 -18  -6  -1    2.56    0.68 
 -18   6  -1    3.10    0.86 
 -18   6  -1    3.06    1.06 
 -18  -7   1    0.80    0.54 
 -18  -7   1    2.76    0.98 
 -18   7   1    1.61    0.73 
 -18   7   1    1.43    0.93 
 -17  -7   1    1.54    0.82 
 -17  -7   1    0.74    0.49 
 -17   7   1    1.16    0.71 
 -17   7   1    1.42    0.89 
  16  -7  -1    4.11    0.89 
 -16  -7   1    3.27    0.92 
 -16  -7   1    3.61    0.77 
 -16   7   1    2.49    0.94 
 -16   7   1    3.05    0.86 
  15  -7  -1    0.24    0.38 
  15  -7  -1   -0.25    0.43 
 -15  -7   1   -0.05    0.33 
 -15  -7   1    0.39    0.50 
 -15   7   1    0.92    0.57 
 -15   7   1    0.21    0.56 
 -14  -7   1    3.14    0.82 
  14  -7  -1    3.72    0.78 
  14  -7  -1    3.94    0.69 
 -14  -7   1    2.37    0.60 
 -14   7   1    4.00    0.88 
  14   7  -1    3.37    0.73 
 -14   7   1    2.01    0.82 
 -13  -7   1    5.53    1.02 
 -13  -7   1    4.23    0.74 
  13  -7  -1    4.55    0.68 
  13  -7  -1    4.20    0.76 
 -13   7   1    4.98    0.76 
  13   7  -1    5.14    0.80 
 -13   7   1    4.27    1.02 
 -13   7   1    4.61    0.81 
 -13   7   1    4.01    0.86 
  12  -7  -1    5.31    0.82 
 -12  -7   1    5.28    0.96 
 -12  -7   1    3.67    0.66 
 -12   7   1    5.15    0.83 
 -12   7   1    4.71    0.76 
  12   7  -1    4.01    0.68 
 -12   7   1    4.64    0.89 
 -12   7   1    4.82    1.00 
 -12   7   1    4.33    0.71 
 -11  -7   1   34.34    1.98 
 -11  -7   1   34.87    1.34 
 -11  -7   1   33.22    1.34 
 -11  -7   1   35.72    1.77 
  11  -7  -1   35.64    1.78 
 -11   7   1   31.63    1.70 
 -11   7   1   35.85    1.96 
  11   7  -1   33.98    1.70 
 -11   7   1   32.74    1.76 
 -11   7   1   34.95    1.74 
 -11   7   1   31.99    2.06 
 -10  -7   1    0.04    0.19 
 -10  -7   1    0.11    0.33 
  10  -7  -1   -0.04    0.30 
 -10  -7   1    0.20    0.30 
 -10  -7   1   -0.07    0.19 
 -10   7   1    0.27    0.34 
 -10   7   1   -0.22    0.30 
  10   7  -1    0.24    0.31 
 -10   7   1   -0.28    0.36 
 -10   7   1    0.18    0.32 
 -10   7   1    0.11    0.32 
  -9  -7   1    7.83    0.51 
   9  -7  -1    7.41    0.77 
  -9  -7   1    6.94    0.90 
  -9  -7   1    6.20    0.71 
  -9  -7   1    6.59    0.48 
   9   7  -1    6.81    0.47 
  -9   7   1    6.02    0.90 
  -9   7   1    7.10    0.86 
  -9   7   1    8.80    0.89 
  -9   7   1    6.80    0.79 
   9   7  -1    8.05    0.79 
  -9   7   1    7.40    0.82 
  -8  -7   1    3.01    0.50 
   8  -7  -1    3.78    0.54 
  -8  -7   1    4.34    0.65 
  -8  -7   1    3.29    0.38 
   8  -7  -1    5.72    0.76 
  -8  -7   1    3.81    0.39 
  -8  -7   1    3.59    0.62 
  -8   7   1    3.61    0.53 
  -8   7   1    4.07    0.74 
  -8   7   1    2.89    0.56 
  -8   7   1    2.87    0.52 
   8   7  -1    4.04    0.37 
   8   7  -1    4.35    0.55 
  -8   7   1    3.81    0.59 
  -7  -7   1    0.13    0.22 
  -7  -7   1    0.54    0.29 
  -7  -7   1    0.08    0.15 
   7  -7  -1   -0.01    0.22 
   7  -7  -1    0.46    0.25 
  -7  -7   1    0.04    0.15 
  -7  -7   1   -0.03    0.24 
  -7   7   1    0.29    0.22 
  -7   7   1    0.02    0.21 
   7   7  -1    0.31    0.14 
  -7   7   1    0.04    0.26 
   7   7  -1   -0.35    0.15 
  -7   7   1    0.52    0.29 
  -7   7   1    0.30    0.26 
   6  -7  -1  102.30    3.55 
  -6  -7   1  107.98    3.41 
  -6  -7   1  110.80    3.78 
  -6  -7   1  109.59    3.41 
  -6  -7   1   99.90    3.57 
   6  -7  -1  104.12    3.71 
  -6  -7   1  107.27    3.69 
  -6   7   1  106.09    3.70 
   6   7  -1  108.68    3.56 
   6   7  -1  109.34    3.29 
  -6   7   1  103.44    3.85 
  -6   7   1  105.31    3.60 
  -6   7   1  109.23    3.72 
  -6   7   1  104.09    3.72 
  -5  -7   1    1.03    0.20 
  -5  -7   1    0.88    0.19 
   5  -7  -1    1.08    0.31 
  -5  -7   1    0.77    0.27 
   5  -7  -1    0.54    0.22 
  -5  -7   1    0.38    0.20 
  -5  -7   1    0.74    0.25 
  -5   7   1    1.12    0.30 
  -5   7   1    1.42    0.32 
   5   7  -1    0.94    0.24 
   5   7  -1    0.81    0.13 
  -5   7   1    0.94    0.26 
  -5   7   1    0.63    0.27 
  -5   7   1    0.64    0.30 
  -4  -7   1   40.43    1.40 
  -4  -7   1   41.52    1.58 
   4  -7  -1   40.33    1.59 
  -4  -7   1   40.62    1.41 
  -4  -7   1   39.45    1.50 
  -4  -7   1   39.23    1.56 
   4  -7  -1   40.31    1.49 
   4   7  -1   39.53    1.27 
   4   7  -1   40.47    1.50 
  -4   7   1   41.06    1.60 
  -4   7   1   41.21    1.60 
  -4   7   1   37.65    1.48 
  -4   7   1   42.24    1.61 
  -4   7   1   40.36    1.67 
   4   7  -1   40.40    1.48 
   3  -7  -1  108.34    3.47 
  -3  -7   1  110.74    3.40 
  -3  -7   1  106.75    3.31 
  -3  -7   1  107.70    3.44 
  -3  -7   1  103.93    3.31 
   3  -7  -1  107.98    3.39 
   3   7  -1  106.52    3.39 
  -3   7   1  106.95    3.48 
   3   7  -1  105.27    3.36 
  -3   7   1  101.13    3.46 
  -3   7   1  105.65    3.52 
   3   7  -1  105.98    3.19 
  -3   7   1  105.14    3.46 
  -3   7   1  105.83    3.37 
   2  -7  -1    1.36    0.23 
  -2  -7   1    1.64    0.19 
  -2  -7   1    1.30    0.18 
   2  -7  -1    1.20    0.19 
  -2  -7   1    0.74    0.15 
  -2   7   1    1.09    0.22 
   2   7  -1    1.08    0.17 
  -2   7   1    1.63    0.25 
  -2   7   1    1.30    0.18 
   2   7  -1    1.34    0.12 
  -2   7   1    1.44    0.23 
   2   7  -1    1.04    0.17 
   2   7  -1    1.19    0.18 
  -2   7   1    0.85    0.19 
  -1  -7   1   55.40    1.77 
  -1  -7   1   55.86    1.76 
  -1  -7   1   53.28    1.75 
  -1  -7   1   53.28    1.75 
   1  -7  -1   55.73    1.81 
   1  -7  -1   54.65    1.78 
  -1   7   1   57.87    1.81 
  -1   7   1   55.04    1.72 
   1   7  -1   55.93    1.72 
  -1   7   1   55.65    1.81 
  -1   7   1   53.32    1.80 
   1   7  -1   54.34    1.76 
   1   7  -1   55.08    1.77 
  -1   7   1   54.60    1.81 
   1   7  -1   52.26    1.69 
   1   7  -1   52.15    1.77 
   0  -7   1  489.98   14.71 
   0  -7   1  506.29   14.83 
   0  -7  -1  494.21   14.92 
   0  -7   1  514.14   14.94 
   0  -7  -1  504.94   14.72 
   0   7  -1  491.69   14.72 
   0   7  -1  506.18   14.82 
   0   7   1  506.74   14.72 
   0   7   1  484.65   14.70 
   0   7  -1  476.26   14.82 
   0   7   1  494.09   14.92 
   0   7   1  494.89   14.73 
   0   7  -1  503.31   14.71 
   1  -7   1    0.45    0.12 
   1  -7   1    0.69    0.15 
  -1  -7  -1    0.29    0.10 
  -1  -7  -1    0.71    0.13 
  -1   7  -1    0.58    0.14 
  -1   7  -1    0.89    0.15 
   1   7   1    0.62    0.13 
  -1   7  -1    0.45    0.12 
   1   7   1    0.58    0.11 
   1   7   1    0.60    0.12 
  -1   7  -1    0.57    0.15 
  -1   7  -1    0.44    0.13 
  -2  -7  -1   90.20    2.78 
   2  -7   1   90.82    2.88 
   2  -7   1   87.33    2.84 
  -2  -7  -1   89.80    2.86 
  -2  -7  -1   87.97    2.81 
   2   7   1   92.47    2.82 
  -2   7  -1   88.86    2.90 
  -2   7  -1   95.73    2.90 
  -2   7  -1   91.96    2.91 
   2   7   1   91.95    2.82 
  -2   7  -1   91.52    2.89 
  -2   7  -1   90.56    2.98 
  -3  -7  -1   35.97    1.15 
  -3  -7  -1   32.70    1.32 
   3  -7   1   37.48    1.32 
  -3  -7  -1   35.08    1.22 
  -3  -7  -1   33.75    1.27 
   3  -7   1   36.22    1.23 
  -3  -7  -1   34.55    1.15 
  -3   7  -1   35.67    1.33 
  -3   7  -1   34.47    1.30 
  -3   7  -1   34.66    1.42 
   3   7   1   34.78    1.22 
  -3   7  -1   34.50    1.33 
  -3   7  -1   34.17    1.31 
  -4  -7  -1   17.28    0.61 
  -4  -7  -1   16.70    0.60 
  -4  -7  -1   16.63    0.71 
   4  -7   1   14.49    0.77 
  -4  -7  -1   16.59    0.61 
  -4  -7  -1   17.03    0.85 
  -4  -7  -1   15.76    0.77 
   4  -7   1   17.37    0.72 
  -4   7  -1   16.05    0.81 
  -4   7  -1   16.12    0.80 
   4   7   1   16.13    0.71 
  -4   7  -1   15.65    0.81 
  -4   7  -1   16.66    0.92 
  -4   7  -1   15.41    0.79 
   5  -7   1  136.81    4.07 
  -5  -7  -1  122.38    4.14 
  -5  -7  -1  127.78    4.28 
  -5  -7  -1  124.20    4.05 
  -5  -7  -1  123.96    3.87 
   5  -7   1  128.86    4.19 
  -5  -7  -1  126.79    3.87 
  -5  -7  -1  129.22    3.87 
  -5   7  -1  130.84    4.21 
  -5   7  -1  131.80    4.21 
  -5   7  -1  123.74    4.38 
  -5   7  -1  126.28    4.20 
  -5   7  -1  123.86    4.19 
   5   7   1  129.22    4.06 
  -6  -7  -1   36.78    1.68 
   6  -7   1   39.42    1.49 
  -6  -7  -1   37.89    1.57 
  -6  -7  -1   37.16    1.26 
   6  -7   1   37.21    1.60 
  -6  -7  -1   37.84    1.48 
  -6  -7  -1   38.17    1.27 
  -6   7  -1   40.69    1.62 
   6   7   1   38.05    1.22 
  -6   7  -1   38.51    1.60 
  -6   7  -1   36.83    1.61 
  -6   7  -1   36.61    1.78 
   6   7   1   38.62    1.48 
  -6   7  -1   39.80    1.63 
  -7  -7  -1   11.74    0.52 
   7  -7   1   10.44    0.80 
  -7  -7  -1   13.23    0.54 
  -7  -7  -1   12.73    0.91 
   7  -7   1   13.46    0.75 
  -7  -7  -1   12.45    0.74 
  -7  -7  -1   12.19    0.81 
   7   7   1   13.43    0.74 
   7   7   1   13.25    0.52 
  -7   7  -1   14.90    0.88 
  -7   7  -1   11.80    0.84 
  -7   7  -1   12.07    0.83 
  -7   7  -1   12.92    0.82 
  -7   7  -1   12.35    0.99 
  -7   7  -1   13.29    0.75 
   8  -7   1   97.10    3.28 
  -8  -7  -1   92.23    2.91 
  -8  -7  -1   93.17    3.27 
  -8  -7  -1   93.16    2.91 
  -8  -7  -1   94.42    3.60 
  -8  -7  -1   94.51    3.38 
  -8   7  -1   85.99    3.41 
  -8   7  -1   91.64    3.34 
  -8   7  -1   91.51    3.42 
   8   7   1   95.90    3.25 
   8   7   1   96.40    2.94 
  -8   7  -1   91.08    3.71 
  -8   7  -1   98.06    3.37 
   9  -7   1    1.86    0.40 
  -9  -7  -1    2.30    0.22 
  -9  -7  -1    1.28    0.35 
  -9  -7  -1    1.49    0.49 
  -9  -7  -1    2.15    0.22 
  -9   7  -1    1.55    0.44 
  -9   7  -1    1.83    0.42 
  -9   7  -1    1.92    0.44 
  -9   7  -1    1.89    0.49 
   9   7   1    2.01    0.40 
  -9   7  -1    1.41    0.52 
 -10  -7  -1   45.71    2.36 
  10  -7   1   52.74    2.14 
 -10  -7  -1   52.52    2.12 
 -10   7  -1   50.55    2.32 
 -10   7  -1   49.41    2.09 
 -10   7  -1   47.51    2.23 
  10   7   1   48.33    2.06 
 -10   7  -1   51.85    2.60 
 -10   7  -1   50.48    2.09 
 -11  -7  -1    4.18    0.82 
 -11  -7  -1    5.37    0.71 
  11  -7   1    5.44    0.74 
 -11   7  -1    3.38    0.81 
 -11   7  -1    4.86    0.64 
 -11   7  -1    5.35    0.68 
 -11   7  -1    4.84    0.75 
 -11   7  -1    4.93    0.80 
 -12  -7  -1    3.79    0.87 
  12  -7   1    4.37    0.70 
 -12  -7  -1    3.11    0.59 
  12   7   1    4.14    0.69 
 -12   7  -1    3.15    0.70 
 -12   7  -1    2.88    0.83 
 -12   7  -1    2.97    0.67 
 -12   7  -1    4.57    0.68 
 -13  -7  -1    2.40    0.55 
 -13  -7  -1    3.02    0.87 
  13  -7   1    3.03    0.66 
 -13   7  -1    2.31    0.67 
 -13   7  -1    3.23    0.77 
 -13   7  -1    2.31    0.86 
  14  -7   1    0.33    0.45 
 -14  -7  -1    0.44    0.36 
 -14  -7  -1   -0.04    0.46 
 -14   7  -1    0.34    0.48 
 -14   7  -1    0.03    0.43 
 -14   7  -1    1.37    0.68 
  15  -7   1    0.76    0.53 
 -15  -7  -1    0.43    0.52 
 -15  -7  -1    0.80    0.42 
 -15   7  -1    0.89    0.70 
 -15   7  -1    1.25    0.63 
 -16  -7  -1    1.89    0.79 
 -16  -7  -1    1.82    0.55 
 -16   7  -1    2.30    0.77 
 -16   7  -1    1.91    0.85 
 -17  -7  -1   -0.11    0.35 
 -17  -7  -1   -0.44    0.44 
 -17   7  -1   -0.60    0.64 
 -17   7  -1   -0.30    0.50 
 -18  -7  -1    0.70    0.65 
 -18   7  -1    1.89    0.95 
 -18  -8   1    0.12    0.60 
 -18   8   1    0.61    0.83 
 -18   8   1   -0.63    0.49 
 -17  -8   1    0.18    0.42 
 -17  -8   1    0.65    0.63 
  17  -8  -1    0.41    0.60 
 -17   8   1    0.90    0.77 
 -17   8   1   -0.39    0.52 
  16  -8  -1   -0.20    0.51 
 -16  -8   1    0.40    0.63 
  16  -8  -1    0.49    0.45 
 -16  -8   1    0.18    0.39 
 -16   8   1    0.64    0.59 
 -16   8   1    0.39    0.71 
  15  -8  -1    3.58    0.82 
  15  -8  -1    1.73    0.50 
 -15  -8   1    1.55    0.69 
 -15  -8   1    1.39    0.52 
 -15   8   1    2.65    0.95 
 -15   8   1    2.13    0.70 
  14  -8  -1    3.21    0.74 
 -14  -8   1    2.02    0.57 
 -14  -8   1    2.28    0.74 
  14  -8  -1    2.56    0.58 
 -14   8   1    2.01    0.79 
 -14   8   1    2.25    0.74 
  14   8  -1    2.67    0.64 
 -13  -8   1    3.21    0.68 
  13  -8  -1    3.79    0.74 
 -13  -8   1    5.58    0.98 
 -13   8   1    3.63    0.70 
  13   8  -1    4.31    0.74 
 -13   8   1    3.97    0.83 
 -13   8   1    3.23    0.90 
 -13   8   1    3.26    0.67 
  12  -8  -1    4.74    0.79 
 -12  -8   1    4.99    0.73 
 -12  -8   1    5.27    0.93 
 -12   8   1    6.53    0.85 
 -12   8   1    6.49    1.13 
 -12   8   1    7.64    0.94 
 -12   8   1    5.46    0.85 
  12   8  -1    7.22    0.88 
 -12   8   1    6.08    0.95 
 -11  -8   1    1.30    0.51 
 -11  -8   1    1.34    0.28 
 -11  -8   1    1.78    0.30 
 -11  -8   1    0.72    0.39 
 -11   8   1    1.22    0.43 
 -11   8   1    1.11    0.58 
 -11   8   1    1.37    0.47 
  11   8  -1    0.37    0.36 
 -11   8   1    1.03    0.48 
 -11   8   1    0.56    0.46 
  10  -8  -1   20.46    1.23 
 -10  -8   1   20.46    0.92 
 -10  -8   1   19.88    1.39 
 -10  -8   1   21.48    1.26 
 -10  -8   1   20.53    0.93 
 -10   8   1   23.42    1.64 
 -10   8   1   24.12    1.34 
 -10   8   1   22.35    1.44 
  10   8  -1   22.36    1.24 
 -10   8   1   20.34    1.25 
 -10   8   1   19.81    1.26 
  -9  -8   1    9.74    1.07 
  -9  -8   1    8.26    0.83 
  -9  -8   1    9.10    0.54 
  -9  -8   1    8.85    0.55 
   9  -8  -1    8.36    0.85 
  -9   8   1   10.05    0.99 
  -9   8   1   10.22    0.99 
  -9   8   1    8.62    0.89 
   9   8  -1    9.57    0.75 
  -9   8   1    8.86    1.11 
  -9   8   1    9.07    0.98 
  -8  -8   1   57.82    1.99 
  -8  -8   1   59.85    2.49 
  -8  -8   1   56.48    2.39 
  -8  -8   1   54.79    2.23 
  -8  -8   1   55.80    1.97 
   8  -8  -1   60.69    2.26 
   8   8  -1   57.75    2.21 
  -8   8   1   57.75    2.43 
  -8   8   1   51.98    2.30 
  -8   8   1   57.93    2.61 
  -8   8   1   56.37    2.28 
  -8   8   1   55.97    2.35 
   8   8  -1   55.61    1.89 
   7  -8  -1   24.85    1.19 
  -7  -8   1   25.79    1.31 
  -7  -8   1   24.84    1.21 
  -7  -8   1   25.31    1.01 
  -7  -8   1   22.09    1.28 
  -7  -8   1   26.63    1.03 
   7  -8  -1   24.15    1.32 
   7   8  -1   24.14    1.16 
  -7   8   1   24.66    1.46 
   7   8  -1   26.14    0.92 
  -7   8   1   23.28    1.30 
  -7   8   1   25.29    1.23 
  -7   8   1   21.39    1.25 
  -7   8   1   26.25    1.33 
  -6  -8   1   44.96    1.81 
  -6  -8   1   47.90    1.65 
   6  -8  -1   47.20    1.81 
   6  -8  -1   48.08    1.96 
  -6  -8   1   47.56    1.96 
  -6  -8   1   48.67    1.66 
  -6  -8   1   45.40    1.90 
  -6   8   1   46.27    1.93 
  -6   8   1   47.79    2.09 
   6   8  -1   44.53    1.77 
  -6   8   1   46.64    1.84 
   6   8  -1   46.94    1.51 
  -6   8   1   44.67    1.92 
  -6   8   1   45.94    1.94 
  -5  -8   1  112.01    3.82 
  -5  -8   1  112.14    3.58 
   5  -8  -1  114.55    3.73 
  -5  -8   1  112.05    3.84 
  -5  -8   1  114.40    3.74 
   5  -8  -1  115.57    3.86 
  -5  -8   1  111.26    3.57 
  -5   8   1  117.09    3.88 
  -5   8   1  108.87    3.84 
   5   8  -1  113.72    3.42 
  -5   8   1  112.21    3.98 
   5   8  -1  114.80    3.71 
  -5   8   1  113.32    3.86 
  -5   8   1  116.49    3.76 
  -4  -8   1   62.58    2.21 
  -4  -8   1   64.89    2.30 
   4  -8  -1   64.65    2.32 
  -4  -8   1   67.82    2.12 
  -4  -8   1   61.33    2.10 
   4  -8  -1   64.56    2.22 
  -4   8   1   65.81    2.34 
  -4   8   1   69.46    2.36 
   4   8  -1   62.16    2.18 
   4   8  -1   63.39    1.96 
  -4   8   1   62.25    2.32 
   4   8  -1   66.20    2.22 
  -4   8   1   61.85    2.39 
  -4   8   1   64.36    2.22 
  -3  -8   1   52.33    1.80 
   3  -8  -1   51.19    1.82 
  -3  -8   1   48.55    1.65 
  -3  -8   1   49.00    1.73 
  -3  -8   1   48.64    1.66 
   3  -8  -1   51.02    1.74 
   3   8  -1   49.71    1.73 
  -3   8   1   48.29    1.81 
  -3   8   1   50.24    1.82 
   3   8  -1   49.75    1.71 
  -3   8   1   48.76    1.71 
  -3   8   1   52.40    1.89 
  -3   8   1   47.08    1.80 
   3   8  -1   50.21    1.53 
  -2  -8   1  166.42    4.98 
   2  -8  -1  163.81    5.09 
  -2  -8   1  161.73    4.98 
  -2  -8   1  162.36    5.02 
   2  -8  -1  169.45    5.05 
  -2   8   1  166.67    4.99 
  -2   8   1  164.12    5.10 
  -2   8   1  164.56    5.10 
  -2   8   1  162.32    5.10 
   2   8  -1  162.50    5.00 
   2   8  -1  165.92    5.01 
   2   8  -1  162.71    5.03 
   2   8  -1  162.50    4.88 
  -2   8   1  159.33    5.12 
  -1  -8   1    3.74    0.25 
   1  -8  -1    3.67    0.29 
   1  -8  -1    4.24    0.28 
  -1  -8   1    4.16    0.27 
  -1  -8   1    3.53    0.25 
  -1  -8   1    4.03    0.26 
   1   8  -1    4.08    0.23 
  -1   8   1    3.91    0.23 
   1   8  -1    3.87    0.27 
  -1   8   1    3.93    0.30 
  -1   8   1    3.98    0.28 
   1   8  -1    3.68    0.26 
   1   8  -1    3.83    0.25 
  -1   8   1    4.34    0.29 
  -1   8   1    3.69    0.29 
   0  -8  -1   14.84    0.59 
   0  -8   1   14.88    0.59 
   0  -8   1   14.61    0.59 
   0  -8  -1   14.40    0.58 
   0  -8   1   13.64    0.58 
   0   8   1   15.48    0.61 
   0   8  -1   13.64    0.58 
   0   8  -1   13.12    0.57 
   0   8   1   14.36    0.51 
   0   8   1   13.96    0.58 
   0   8   1   13.93    0.58 
   0   8  -1   14.64    0.60 
   0   8  -1   14.59    0.56 
  -1  -8  -1    1.66    0.19 
   1  -8   1    1.67    0.21 
  -1  -8  -1    2.08    0.21 
   1  -8   1    1.49    0.19 
  -1   8  -1    1.69    0.23 
  -1   8  -1    1.95    0.21 
  -1   8  -1    1.80    0.22 
   1   8   1    1.83    0.20 
  -1   8  -1    1.63    0.20 
   1   8   1    1.68    0.18 
   1   8   1    1.42    0.14 
  -1   8  -1    1.98    0.22 
   1   8   1    1.71    0.19 
  -2  -8  -1    3.40    0.27 
  -2  -8  -1    3.34    0.22 
   2  -8   1    2.72    0.29 
  -2  -8  -1    3.49    0.24 
   2  -8   1    2.80    0.24 
   2   8   1    3.15    0.23 
  -2   8  -1    3.44    0.28 
   2   8   1    2.63    0.22 
  -2   8  -1    3.01    0.27 
  -2   8  -1    3.81    0.37 
  -2   8  -1    3.23    0.33 
  -2   8  -1    3.03    0.35 
  -3  -8  -1  111.37    3.53 
   3  -8   1  111.70    3.56 
  -3  -8  -1  115.89    3.67 
   3  -8   1  119.02    3.65 
  -3  -8  -1  116.67    3.47 
  -3  -8  -1  109.89    3.60 
  -3   8  -1  113.29    3.67 
  -3   8  -1  112.69    3.67 
  -3   8  -1  112.07    3.64 
  -3   8  -1  113.69    3.65 
   3   8   1  112.72    3.54 
  -3   8  -1  114.31    3.77 
  -4  -8  -1   85.25    2.76 
  -4  -8  -1   87.88    2.66 
   4  -8   1   85.63    2.78 
  -4  -8  -1   83.41    2.65 
  -4  -8  -1   83.56    2.92 
  -4  -8  -1   85.66    2.86 
   4  -8   1   86.61    2.89 
  -4   8  -1   83.48    2.91 
  -4   8  -1   87.47    3.07 
  -4   8  -1   84.35    2.90 
  -4   8  -1   86.09    2.89 
  -4   8  -1   87.92    2.93 
   4   8   1   86.10    2.77 
  -5  -8  -1   49.63    1.61 
  -5  -8  -1   51.83    1.61 
   5  -8   1   53.07    1.80 
  -5  -8  -1   48.32    1.59 
   5  -8   1   49.95    1.90 
  -5  -8  -1   51.21    1.77 
  -5  -8  -1   50.03    1.97 
  -5  -8  -1   48.48    1.86 
  -5   8  -1   50.55    1.93 
  -5   8  -1   47.16    1.90 
  -5   8  -1   45.72    2.05 
  -5   8  -1   47.46    1.90 
  -5   8  -1   48.13    1.89 
   5   8   1   52.38    1.78 
  -6  -8  -1   58.01    1.85 
  -6  -8  -1   56.07    2.29 
  -6  -8  -1   61.70    2.22 
  -6  -8  -1   58.25    1.86 
   6  -8   1   60.40    2.10 
  -6  -8  -1   56.48    2.07 
   6  -8   1   57.70    2.23 
  -6  -8  -1   58.28    1.86 
  -6   8  -1   57.78    2.24 
  -6   8  -1   56.84    2.22 
   6   8   1   58.90    2.08 
  -6   8  -1   57.76    2.44 
  -6   8  -1   58.40    2.23 
  -6   8  -1   55.91    2.21 
  -7  -8  -1   19.45    0.73 
  -7  -8  -1   18.89    0.71 
   7  -8   1   20.56    0.97 
  -7  -8  -1   18.07    0.94 
   7  -8   1   18.46    1.07 
  -7  -8  -1   19.40    1.05 
  -7  -8  -1   20.03    1.16 
   7   8   1   19.23    0.68 
  -7   8  -1   16.59    1.05 
  -7   8  -1   20.09    1.08 
   7   8   1   19.79    0.96 
  -7   8  -1   21.10    1.10 
  -7   8  -1   18.74    1.07 
  -7   8  -1   17.73    1.24 
   8  -8   1    3.35    0.47 
  -8  -8  -1    3.48    0.29 
  -8  -8  -1    3.21    0.61 
  -8  -8  -1    3.24    0.54 
  -8  -8  -1    3.33    0.48 
  -8  -8  -1    3.21    0.26 
  -8   8  -1    3.53    0.55 
  -8   8  -1    4.67    0.82 
   8   8   1    4.44    0.30 
  -8   8  -1    4.15    0.61 
  -8   8  -1    3.96    0.59 
   8   8   1    3.82    0.51 
  -8   8  -1    4.74    0.67 
  -9  -8  -1    0.52    0.35 
  -9  -8  -1    0.78    0.30 
  -9  -8  -1    0.69    0.14 
  -9  -8  -1    0.71    0.15 
   9  -8   1    1.36    0.38 
  -9   8  -1    0.85    0.39 
  -9   8  -1    0.31    0.33 
  -9   8  -1    1.44    0.55 
  -9   8  -1    1.18    0.41 
  -9   8  -1    0.53    0.31 
   9   8   1    1.14    0.33 
 -10  -8  -1   10.11    1.12 
  10  -8   1   10.60    0.83 
 -10  -8  -1    7.35    0.76 
 -10   8  -1    9.96    0.92 
 -10   8  -1    9.51    1.26 
 -10   8  -1   11.20    0.86 
 -10   8  -1    9.94    1.06 
 -10   8  -1    9.21    0.99 
  10   8   1   10.56    0.80 
 -11  -8  -1   10.17    0.83 
  11  -8   1    8.89    0.95 
 -11  -8  -1    8.76    1.12 
 -11   8  -1   10.22    1.14 
 -11   8  -1    9.43    1.04 
  11   8   1    9.57    0.94 
 -11   8  -1    8.06    0.86 
 -11   8  -1    9.48    1.28 
 -11   8  -1    9.68    0.92 
 -12  -8  -1   49.35    2.19 
  12  -8   1   49.67    2.29 
 -12  -8  -1   48.87    2.58 
 -12   8  -1   52.07    2.53 
 -12   8  -1   49.84    2.42 
 -12   8  -1   47.40    2.74 
 -12   8  -1   51.81    2.18 
  12   8   1   52.53    2.26 
  13  -8   1    2.10    0.59 
 -13  -8  -1    2.12    0.69 
 -13  -8  -1    1.85    0.51 
 -13   8  -1    2.02    0.66 
 -13   8  -1    1.30    0.65 
 -13   8  -1    2.06    0.66 
 -14  -8  -1    2.69    0.78 
  14  -8   1    1.25    0.57 
 -14  -8  -1    3.37    0.62 
 -14   8  -1    2.91    0.96 
 -14   8  -1    1.04    0.59 
 -14   8  -1    2.54    0.71 
  15  -8   1    2.26    0.66 
 -15  -8  -1    1.83    0.51 
 -15  -8  -1    2.41    0.83 
 -15   8  -1    1.71    0.81 
 -15   8  -1    2.24    0.71 
 -16  -8  -1    4.03    1.01 
 -16  -8  -1    3.92    0.71 
 -16   8  -1    3.91    0.88 
 -16   8  -1    5.04    1.22 
 -17  -8  -1    0.04    0.35 
 -17  -8  -1   -0.24    0.54 
 -17   8  -1    0.13    0.55 
 -17   8  -1   -0.03    0.70 
 -17  -9   1    0.35    0.45 
 -17  -9   1   -0.83    0.46 
  17  -9  -1    1.33    0.69 
 -17   9   1   -0.07    0.67 
 -17   9   1    0.82    0.64 
 -16  -9   1    6.82    0.97 
 -16  -9   1    4.22    1.00 
  16  -9  -1    4.92    0.99 
  16  -9  -1    6.01    0.94 
 -16   9   1    5.87    1.30 
 -16   9   1    5.53    1.09 
  15  -9  -1    0.03    0.37 
 -15  -9   1    0.03    0.33 
  15  -9  -1    0.14    0.48 
 -15  -9   1    0.10    0.51 
 -15   9   1    0.01    0.51 
 -15   9   1    0.19    0.61 
 -14  -9   1    0.72    0.45 
  14  -9  -1    0.86    0.41 
 -14  -9   1    0.92    0.59 
  14  -9  -1    0.93    0.50 
 -14   9   1    0.74    0.64 
 -14   9   1    0.41    0.52 
  14   9  -1    2.06    0.63 
 -13  -9   1   -0.04    0.40 
 -13  -9   1   -0.15    0.31 
  13  -9  -1   -0.13    0.38 
 -13   9   1   -0.44    0.34 
 -13   9   1   -0.11    0.38 
 -13   9   1    0.29    0.40 
  13   9  -1    0.03    0.36 
 -13   9   1    0.10    0.43 
 -13   9   1   -0.59    0.50 
 -12  -9   1    0.36    0.35 
  12  -9  -1    0.30    0.40 
 -12  -9   1    0.81    0.52 
  12   9  -1    0.18    0.35 
 -12   9   1    0.51    0.41 
 -12   9   1    0.10    0.34 
 -12   9   1   -0.40    0.34 
 -12   9   1    0.50    0.60 
 -12   9   1    0.27    0.41 
  11  -9  -1    8.12    0.96 
 -11  -9   1    9.88    0.98 
 -11  -9   1   10.22    1.23 
 -11  -9   1    9.84    0.58 
 -11   9   1   10.90    1.08 
 -11   9   1    9.05    1.13 
 -11   9   1    9.02    1.01 
 -11   9   1    8.45    1.22 
 -11   9   1   11.03    1.10 
  11   9  -1   10.25    0.98 
  10  -9  -1   24.78    1.40 
 -10  -9   1   26.75    1.41 
 -10  -9   1   24.59    1.04 
 -10  -9   1   25.22    1.06 
 -10  -9   1   28.23    1.64 
 -10   9   1   24.51    1.44 
 -10   9   1   26.33    1.76 
 -10   9   1   25.53    1.48 
 -10   9   1   25.32    1.44 
  10   9  -1   25.76    1.37 
 -10   9   1   24.22    1.56 
  -9  -9   1    1.81    0.29 
  -9  -9   1    1.34    0.26 
  -9  -9   1    1.53    0.49 
  -9  -9   1    1.63    0.41 
   9  -9  -1    2.13    0.47 
  -9   9   1    1.85    0.44 
  -9   9   1    1.40    0.54 
  -9   9   1    1.16    0.42 
  -9   9   1    1.11    0.49 
  -9   9   1    2.52    0.55 
   9   9  -1    1.39    0.37 
  -8  -9   1    1.22    0.33 
   8  -9  -1    2.12    0.43 
  -8  -9   1    1.06    0.23 
  -8  -9   1    1.46    0.45 
  -8  -9   1    1.40    0.25 
  -8   9   1    0.80    0.43 
  -8   9   1    1.46    0.43 
  -8   9   1    1.55    0.43 
  -8   9   1    1.36    0.36 
   8   9  -1    1.04    0.32 
  -8   9   1    1.17    0.42 
   7  -9  -1   17.54    1.08 
  -7  -9   1   15.51    0.92 
  -7  -9   1   17.39    0.76 
  -7  -9   1   17.78    0.77 
   7  -9  -1   16.79    0.95 
  -7  -9   1   16.77    1.03 
  -7  -9   1   18.34    1.08 
   7   9  -1   16.61    0.63 
   7   9  -1   15.45    0.89 
  -7   9   1   16.02    1.17 
  -7   9   1   16.81    1.04 
  -7   9   1   16.78    0.95 
  -7   9   1   14.41    1.00 
  -7   9   1   16.43    1.06 
  -6  -9   1   70.11    2.36 
  -6  -9   1   69.44    2.67 
  -6  -9   1   69.86    2.65 
   6  -9  -1   74.76    2.73 
   6  -9  -1   69.71    2.54 
  -6  -9   1   71.82    2.36 
  -6  -9   1   71.88    2.55 
  -6   9   1   68.55    2.68 
   6   9  -1   70.24    2.51 
   6   9  -1   69.98    2.18 
  -6   9   1   74.50    2.73 
  -6   9   1   72.44    2.71 
  -6   9   1   71.30    2.57 
  -6   9   1   70.59    2.84 
   5  -9  -1    1.52    0.36 
  -5  -9   1    1.82    0.25 
   5  -9  -1    2.02    0.35 
  -5  -9   1    2.27    0.27 
  -5  -9   1    2.51    0.42 
  -5  -9   1    2.00    0.38 
  -5  -9   1    2.46    0.36 
  -5   9   1    1.20    0.33 
  -5   9   1    1.84    0.37 
  -5   9   1    1.63    0.39 
  -5   9   1    1.17    0.29 
  -5   9   1    1.74    0.43 
   5   9  -1    1.82    0.31 
   5   9  -1    1.43    0.29 
   5   9  -1    1.76    0.13 
  -4  -9   1   49.12    1.84 
  -4  -9   1   47.71    1.65 
   4  -9  -1   49.89    1.78 
  -4  -9   1   49.81    1.67 
   4  -9  -1   49.46    1.88 
  -4  -9   1   49.71    1.77 
   4   9  -1   48.48    1.49 
  -4   9   1   47.04    1.94 
  -4   9   1   49.79    1.77 
   4   9  -1   48.34    1.75 
  -4   9   1   48.81    1.88 
  -4   9   1   47.53    1.88 
   4   9  -1   48.98    1.74 
  -4   9   1   48.68    1.89 
  -3  -9   1    9.23    0.45 
  -3  -9   1    9.52    0.46 
  -3  -9   1    9.69    0.52 
   3  -9  -1    9.05    0.52 
   3  -9  -1    9.64    0.58 
  -3   9   1    8.84    0.49 
  -3   9   1    9.68    0.62 
   3   9  -1    9.84    0.51 
  -3   9   1    9.44    0.58 
  -3   9   1    8.77    0.57 
   3   9  -1    9.29    0.49 
  -3   9   1    8.77    0.57 
   3   9  -1    9.40    0.35 
   3   9  -1    9.25    0.51 
   2  -9  -1   41.60    1.54 
  -2  -9   1   43.69    1.44 
  -2  -9   1   44.72    1.48 
  -2  -9   1   43.19    1.44 
  -2  -9   1   42.13    1.43 
   2  -9  -1   42.41    1.49 
   2   9  -1   42.05    1.40 
   2   9  -1   41.64    1.45 
   2   9  -1   42.80    1.33 
   2   9  -1   42.13    1.47 
  -2   9   1   42.12    1.44 
  -2   9   1   41.57    1.54 
  -2   9   1   41.55    1.54 
   2   9  -1   43.59    1.47 
  -2   9   1   39.52    1.55 
  -2   9   1   41.10    1.54 
  -1  -9   1    6.76    0.38 
  -1  -9   1    7.25    0.38 
   1  -9  -1    6.46    0.37 
   1  -9  -1    7.45    0.41 
  -1  -9   1    6.65    0.35 
  -1  -9   1    7.10    0.37 
  -1   9   1    6.98    0.33 
   1   9  -1    6.85    0.38 
   1   9  -1    6.97    0.37 
  -1   9   1    6.79    0.40 
  -1   9   1    6.75    0.40 
  -1   9   1    7.93    0.43 
   1   9  -1    6.64    0.33 
   1   9  -1    6.54    0.36 
   0  -9  -1    0.36    0.12 
   0  -9   1    0.61    0.14 
   0  -9  -1    0.50    0.13 
   0   9  -1    0.35    0.12 
   0   9   1    0.74    0.15 
   0   9   1    0.40    0.12 
   0   9  -1    0.38    0.11 
   0   9  -1    0.61    0.14 
   0   9   1    0.53    0.10 
   0   9   1    0.32    0.12 
  -1  -9  -1    9.92    0.47 
   1  -9   1   10.55    0.50 
   1  -9   1    9.94    0.48 
  -1  -9  -1   10.22    0.47 
   1   9   1   10.29    0.41 
  -1   9  -1   10.61    0.49 
   1   9   1   10.54    0.47 
   1   9   1   10.94    0.48 
  -1   9  -1   11.23    0.52 
  -1   9  -1    9.92    0.50 
  -1   9  -1   11.18    0.52 
   1   9   1   10.02    0.46 
  -2  -9  -1    2.24    0.25 
   2  -9   1    2.75    0.28 
  -2  -9  -1    2.32    0.20 
  -2  -9  -1    2.53    0.24 
   2  -9   1    1.79    0.25 
  -2   9  -1    2.66    0.30 
   2   9   1    2.54    0.24 
  -2   9  -1    2.41    0.29 
  -2   9  -1    1.88    0.27 
   2   9   1    2.66    0.25 
  -2   9  -1    2.16    0.31 
  -2   9  -1    2.04    0.27 
   2   9   1    2.24    0.24 
  -3  -9  -1   13.00    0.55 
  -3  -9  -1   12.99    0.65 
   3  -9   1   13.45    0.62 
  -3  -9  -1   13.25    0.45 
  -3  -9  -1   14.31    0.60 
   3  -9   1   13.08    0.67 
  -3   9  -1   14.52    0.79 
  -3   9  -1   13.31    0.67 
  -3   9  -1   14.17    0.69 
   3   9   1   14.15    0.61 
   3   9   1   14.00    0.61 
  -3   9  -1   12.28    0.69 
  -3   9  -1   15.12    0.73 
   4  -9   1   10.27    0.63 
  -4  -9  -1   11.14    0.48 
  -4  -9  -1   10.81    0.62 
   4  -9   1   11.41    0.59 
  -4  -9  -1   10.63    0.55 
  -4  -9  -1   11.12    0.48 
  -4  -9  -1   10.24    0.66 
  -4   9  -1   11.43    0.64 
   4   9   1   12.23    0.58 
  -4   9  -1   11.61    0.68 
  -4   9  -1   11.13    0.66 
  -4   9  -1   10.57    0.74 
  -4   9  -1   11.79    0.70 
  -5  -9  -1   46.06    1.52 
   5  -9   1   48.05    1.70 
   5  -9   1   45.00    1.80 
  -5  -9  -1   46.75    1.52 
  -5  -9  -1   48.49    1.87 
  -5  -9  -1   42.81    1.75 
  -5  -9  -1   46.41    1.66 
  -5   9  -1   48.49    1.85 
  -5   9  -1   44.70    1.79 
  -5   9  -1   43.49    1.96 
  -5   9  -1   44.48    1.82 
  -5   9  -1   46.06    1.83 
   5   9   1   47.58    1.68 
  -6  -9  -1   58.47    1.86 
   6  -9   1   56.86    2.23 
  -6  -9  -1   57.52    1.84 
  -6  -9  -1   58.66    2.20 
  -6  -9  -1   56.61    1.86 
   6  -9   1   57.67    2.09 
  -6  -9  -1   58.42    2.29 
  -6  -9  -1   57.10    2.06 
   6   9   1   58.52    2.07 
  -6   9  -1   54.25    2.22 
  -6   9  -1   59.87    2.24 
  -6   9  -1   57.58    2.45 
  -6   9  -1   58.59    2.25 
  -6   9  -1   55.92    2.23 
   7  -9   1    8.68    0.83 
  -7  -9  -1    9.27    0.42 
  -7  -9  -1    9.22    0.42 
  -7  -9  -1    9.48    0.71 
  -7  -9  -1    8.68    0.41 
  -7  -9  -1    8.02    0.58 
  -7  -9  -1   10.98    0.99 
   7  -9   1    8.32    0.61 
  -7   9  -1    9.89    0.74 
  -7   9  -1    9.34    1.04 
   7   9   1    8.28    0.60 
  -7   9  -1    9.33    0.86 
  -7   9  -1    6.22    0.72 
  -7   9  -1    8.08    0.79 
   8  -9   1   99.82    3.42 
  -8  -9  -1  101.24    3.03 
  -8  -9  -1   98.57    3.04 
  -8  -9  -1   96.80    3.36 
  -8  -9  -1   95.17    3.51 
  -8  -9  -1   97.75    3.69 
  -8  -9  -1  100.47    3.04 
  -8   9  -1   94.98    3.53 
  -8   9  -1   95.34    3.53 
   8   9   1   97.39    3.37 
  -8   9  -1   95.36    3.55 
  -8   9  -1   94.90    3.86 
  -8   9  -1   97.78    3.63 
   9  -9   1    0.67    0.32 
  -9  -9  -1    0.44    0.13 
  -9  -9  -1    1.04    0.32 
  -9  -9  -1    0.40    0.12 
  -9  -9  -1    0.55    0.43 
  -9  -9  -1    0.52    0.13 
  -9   9  -1    0.20    0.27 
  -9   9  -1    0.05    0.36 
  -9   9  -1    0.88    0.35 
  -9   9  -1    0.29    0.36 
   9   9   1    0.38    0.27 
  -9   9  -1    0.33    0.31 
 -10  -9  -1   51.50    2.51 
  10  -9   1   54.97    2.28 
 -10  -9  -1   55.44    2.21 
 -10   9  -1   59.79    2.85 
 -10   9  -1   52.84    2.28 
 -10   9  -1   56.29    2.43 
 -10   9  -1   52.99    2.47 
 -10   9  -1   52.44    2.28 
  10   9   1   53.14    2.19 
 -11  -9  -1   11.08    0.85 
 -11  -9  -1   10.29    1.23 
  11  -9   1    9.19    0.97 
 -11   9  -1   10.30    1.12 
  11   9   1   10.26    0.84 
 -11   9  -1   11.36    1.22 
 -11   9  -1   11.17    1.05 
 -11   9  -1   11.62    1.05 
 -11   9  -1   11.15    1.39 
 -12  -9  -1   20.34    1.54 
  12  -9   1   16.88    1.22 
 -12  -9  -1   17.85    1.14 
 -12   9  -1   19.93    1.39 
 -12   9  -1   16.26    1.36 
  12   9   1   18.21    1.18 
 -12   9  -1   17.77    1.16 
 -12   9  -1   14.54    1.69 
 -13  -9  -1    0.59    0.39 
 -13  -9  -1    0.25    0.47 
  13  -9   1    0.20    0.37 
 -13   9  -1    0.36    0.44 
 -13   9  -1   -0.05    0.48 
 -13   9  -1   -0.09    0.40 
 -14  -9  -1    0.48    0.37 
 -14  -9  -1    0.38    0.50 
  14  -9   1   -0.57    0.37 
 -14   9  -1    0.42    0.46 
 -14   9  -1    0.20    0.62 
 -14   9  -1    0.45    0.50 
 -15  -9  -1   -0.02    0.31 
  15  -9   1    0.21    0.50 
 -15  -9  -1   -0.20    0.44 
 -15   9  -1    0.86    0.52 
 -15   9  -1    0.10    0.58 
 -15   9  -1    0.34    0.49 
 -16  -9  -1    0.63    0.40 
 -16  -9  -1    0.61    0.63 
  16  -9   1    0.44    0.47 
 -16   9  -1    0.70    0.73 
 -16   9  -1    0.93    0.66 
 -17  -9  -1    2.43    0.93 
 -17  -9  -1    2.62    0.59 
 -17   9  -1    3.06    1.10 
 -17   9  -1    4.22    0.97 
  17 -10  -1    0.66    0.63 
 -17 -10   1   -0.56    0.33 
 -17 -10   1   -0.64    0.52 
 -17  10   1    0.23    0.68 
 -17  10   1   -0.19    0.52 
 -16 -10   1    1.44    0.74 
 -16 -10   1    2.00    0.59 
  16 -10  -1   -0.21    0.49 
  16 -10  -1    0.91    0.51 
 -16  10   1    1.00    0.74 
 -16  10   1    0.03    0.58 
 -15 -10   1    0.34    0.35 
  15 -10  -1    0.53    0.50 
 -15 -10   1   -0.35    0.51 
  15 -10  -1   -0.09    0.42 
 -15  10   1   -0.15    0.48 
 -15  10   1    0.01    0.55 
  14 -10  -1    0.17    0.36 
 -14 -10   1    0.52    0.41 
 -14 -10   1    1.67    0.67 
  14 -10  -1    1.01    0.57 
 -14  10   1    0.74    0.65 
 -14  10   1    0.22    0.45 
 -13 -10   1    5.87    1.01 
  13 -10  -1    4.77    0.88 
 -13 -10   1    4.56    0.74 
  13  10  -1    3.82    0.72 
 -13  10   1    4.43    0.79 
 -13  10   1    6.57    0.90 
 -13  10   1    3.90    0.86 
 -13  10   1    4.80    0.79 
 -13  10   1    3.98    1.01 
 -12 -10   1   19.76    1.51 
 -12 -10   1   20.86    1.32 
  12 -10  -1   20.40    1.40 
 -12  10   1   21.97    1.42 
 -12  10   1   20.72    1.71 
  12  10  -1   22.20    1.33 
 -12  10   1   20.90    1.56 
 -12  10   1   23.28    1.43 
 -12  10   1   19.66    1.35 
  11 -10  -1    1.27    0.47 
 -11 -10   1    2.33    0.65 
 -11 -10   1    1.58    0.44 
 -11  10   1    2.38    0.67 
 -11  10   1    2.14    0.53 
 -11  10   1    1.86    0.56 
  11  10  -1    1.65    0.46 
 -11  10   1    2.40    0.58 
 -11  10   1    2.70    0.77 
 -10 -10   1   18.28    0.84 
  10 -10  -1   21.34    1.23 
 -10 -10   1   20.08    1.38 
 -10 -10   1   17.53    1.12 
 -10 -10   1   17.58    0.82 
 -10  10   1   19.29    1.21 
 -10  10   1   16.64    1.30 
  10  10  -1   18.03    1.11 
 -10  10   1   17.87    1.23 
 -10  10   1   19.02    1.25 
 -10  10   1   18.64    1.50 
  -9 -10   1    4.12    0.71 
  -9 -10   1    5.21    0.45 
  -9 -10   1    4.63    0.62 
   9 -10  -1    5.52    0.71 
  -9 -10   1    4.41    0.41 
  -9  10   1    4.27    0.65 
  -9  10   1    4.41    0.82 
  -9  10   1    4.64    0.71 
   9  10  -1    4.64    0.62 
  -9  10   1    3.99    0.71 
  -9  10   1    4.14    0.69 
  -8 -10   1   38.49    1.42 
   8 -10  -1   40.12    1.73 
  -8 -10   1   39.45    1.42 
  -8 -10   1   40.66    1.70 
  -8 -10   1   36.95    1.83 
  -8  10   1   39.56    2.06 
   8  10  -1   35.45    1.62 
  -8  10   1   38.71    1.88 
  -8  10   1   36.43    1.80 
  -8  10   1   38.97    1.84 
  -8  10   1   38.17    1.73 
  -7 -10   1   20.83    1.21 
  -7 -10   1   20.48    0.89 
   7 -10  -1   22.45    1.26 
  -7 -10   1   22.02    0.90 
  -7 -10   1   23.13    1.11 
   7 -10  -1   20.28    1.09 
  -7 -10   1   19.69    1.16 
   7  10  -1   21.84    1.07 
  -7  10   1   22.41    1.24 
  -7  10   1   20.28    1.22 
  -7  10   1   22.21    1.37 
   7  10  -1   21.59    0.72 
  -7  10   1   19.66    1.19 
  -7  10   1   22.04    1.13 
  -6 -10   1    1.49    0.38 
  -6 -10   1    1.07    0.29 
  -6 -10   1    1.63    0.37 
  -6 -10   1    1.57    0.24 
  -6 -10   1    1.73    0.25 
   6 -10  -1    1.78    0.35 
   6 -10  -1    1.29    0.38 
  -6  10   1    1.37    0.42 
   6  10  -1    1.40    0.30 
  -6  10   1    1.35    0.40 
  -6  10   1    2.02    0.38 
  -6  10   1    1.97    0.43 
  -6  10   1    1.56    0.39 
  -5 -10   1   12.04    0.60 
  -5 -10   1   13.23    0.62 
  -5 -10   1   13.59    0.73 
  -5 -10   1   13.75    0.81 
   5 -10  -1   14.34    0.87 
  -5 -10   1   11.00    0.76 
   5 -10  -1   13.98    0.76 
   5  10  -1   13.47    0.44 
  -5  10   1   13.20    0.84 
  -5  10   1   13.65    0.84 
  -5  10   1   11.58    0.71 
   5  10  -1   15.17    0.74 
  -5  10   1   12.22    0.89 
   5  10  -1   14.96    0.74 
  -5  10   1   13.07    0.83 
  -4 -10   1   11.18    0.67 
  -4 -10   1   10.95    0.52 
  -4 -10   1   10.71    0.53 
  -4 -10   1   11.09    0.61 
   4 -10  -1   11.19    0.63 
   4 -10  -1   10.65    0.70 
  -4  10   1    9.29    0.68 
  -4  10   1   10.76    0.60 
  -4  10   1   10.99    0.75 
  -4  10   1   11.06    0.71 
   4  10  -1   10.41    0.37 
  -4  10   1   10.25    0.69 
   4  10  -1   10.07    0.58 
   4  10  -1    8.99    0.56 
  -3 -10   1    4.82    0.33 
   3 -10  -1    5.52    0.46 
  -3 -10   1    5.20    0.33 
   3 -10  -1    5.04    0.38 
  -3 -10   1    4.51    0.36 
   3  10  -1    4.98    0.37 
   3  10  -1    4.54    0.34 
  -3  10   1    5.47    0.53 
  -3  10   1    5.96    0.55 
   3  10  -1    4.71    0.35 
  -3  10   1    4.79    0.36 
  -3  10   1    6.68    0.62 
  -3  10   1    5.30    0.53 
  -2 -10   1  156.74    4.82 
   2 -10  -1  162.02    4.89 
  -2 -10   1  160.28    4.82 
  -2 -10   1  156.81    4.81 
  -2 -10   1  154.42    4.85 
   2 -10  -1  153.04    4.93 
  -2  10   1  158.56    4.95 
  -2  10   1  154.05    4.94 
   2  10  -1  154.60    4.83 
   2  10  -1  156.48    4.78 
   2  10  -1  159.04    4.86 
  -2  10   1  155.94    4.82 
  -2  10   1  163.76    4.99 
  -2  10   1  154.70    4.94 
   2  10  -1  156.87    4.85 
   1 -10  -1    5.10    0.37 
  -1 -10   1    6.28    0.36 
   1 -10  -1    5.60    0.36 
  -1 -10   1    6.19    0.36 
  -1 -10   1    6.02    0.36 
   1  10  -1    6.18    0.36 
  -1  10   1    5.66    0.31 
   1  10  -1    6.46    0.32 
  -1  10   1    6.43    0.40 
   1  10  -1    5.59    0.35 
  -1  10   1    5.63    0.38 
  -1  10   1    6.61    0.40 
   1  10  -1    6.37    0.35 
   0 -10  -1   63.16    2.06 
   0 -10   1   62.99    2.05 
   0 -10  -1   62.86    2.05 
   0 -10   1   61.47    2.05 
   0  10   1   63.43    2.07 
   0  10  -1   62.26    2.05 
   0  10  -1   59.79    2.06 
   0  10   1   64.07    2.06 
   0  10  -1   62.14    2.01 
   0  10   1   64.67    2.06 
   0  10   1   62.10    1.96 
   0  10  -1   60.98    2.05 
  -1 -10  -1   -0.34    0.08 
   1 -10   1   -0.13    0.11 
  -1 -10  -1   -0.25    0.09 
   1 -10   1   -0.24    0.09 
  -1  10  -1   -0.38    0.09 
   1  10   1   -0.25    0.08 
   1  10   1   -0.18    0.06 
  -1  10  -1   -0.15    0.11 
  -1  10  -1   -0.19    0.10 
  -1  10  -1   -0.09    0.12 
   1  10   1   -0.14    0.09 
   1  10   1   -0.14    0.10 
   2 -10   1    0.35    0.15 
   2 -10   1    0.67    0.17 
  -2 -10  -1    0.33    0.12 
  -2 -10  -1    0.34    0.13 
  -2 -10  -1    0.54    0.16 
   2  10   1    0.47    0.13 
   2  10   1    0.59    0.15 
  -2  10  -1    0.47    0.16 
  -2  10  -1    0.23    0.17 
  -2  10  -1    0.24    0.14 
  -2  10  -1    0.46    0.17 
   2  10   1    0.63    0.15 
  -2  10  -1    1.09    0.21 
  -3 -10  -1   47.33    1.65 
  -3 -10  -1   49.67    1.50 
   3 -10   1   50.88    1.71 
  -3 -10  -1   44.79    1.71 
   3 -10   1   52.00    1.79 
  -3 -10  -1   49.14    1.60 
  -3  10  -1   46.35    1.79 
  -3  10  -1   48.99    1.89 
  -3  10  -1   49.35    1.78 
  -3  10  -1   50.19    1.81 
   3  10   1   47.55    1.65 
   3  10   1   48.68    1.66 
  -3  10  -1   47.94    1.75 
  -4 -10  -1  183.54    5.74 
  -4 -10  -1  179.31    5.61 
  -4 -10  -1  185.53    5.79 
   4 -10   1  186.23    5.67 
   4 -10   1  183.18    5.78 
  -4 -10  -1  182.68    5.52 
  -4  10  -1  178.50    5.81 
  -4  10  -1  178.42    5.78 
  -4  10  -1  182.32    5.76 
  -4  10  -1  190.94    6.00 
  -4  10  -1  177.07    5.80 
   4  10   1  181.92    5.62 
  -5 -10  -1   11.07    0.48 
  -5 -10  -1   11.43    0.70 
  -5 -10  -1   11.09    0.58 
   5 -10   1   10.49    0.61 
  -5 -10  -1   10.60    0.48 
  -5 -10  -1   11.72    0.73 
   5 -10   1   11.00    0.72 
  -5  10  -1    9.37    0.78 
  -5  10  -1   10.11    0.68 
  -5  10  -1   10.94    0.73 
  -5  10  -1   10.49    0.72 
   5  10   1    9.63    0.58 
  -5  10  -1   10.43    0.71 
  -6 -10  -1  113.73    3.51 
  -6 -10  -1  118.93    3.52 
   6 -10   1  113.40    3.92 
  -6 -10  -1  113.76    3.87 
  -6 -10  -1  117.53    3.98 
  -6 -10  -1  110.92    3.70 
   6 -10   1  114.12    3.77 
  -6  10  -1  107.59    3.91 
  -6  10  -1  112.88    3.94 
   6  10   1  113.02    3.72 
  -6  10  -1  116.75    3.91 
  -6  10  -1  115.17    3.94 
  -6  10  -1  108.26    4.13 
  -7 -10  -1   -0.17    0.15 
   7 -10   1   -0.09    0.18 
  -7 -10  -1   -0.08    0.08 
   7 -10   1   -0.23    0.21 
  -7 -10  -1    0.07    0.10 
  -7 -10  -1   -0.12    0.21 
  -7 -10  -1   -0.06    0.23 
  -7  10  -1    0.04    0.23 
   7  10   1   -0.05    0.16 
  -7  10  -1   -0.04    0.22 
  -7  10  -1    0.10    0.30 
  -7  10  -1    0.19    0.25 
  -7  10  -1    0.03    0.25 
  -8 -10  -1    0.30    0.13 
  -8 -10  -1    0.19    0.28 
   8 -10   1    0.37    0.28 
  -8 -10  -1    0.43    0.35 
  -8 -10  -1    0.33    0.14 
  -8 -10  -1    0.42    0.24 
   8  10   1   -0.03    0.23 
  -8  10  -1    0.06    0.30 
  -8  10  -1   -0.13    0.36 
  -8  10  -1   -0.01    0.25 
  -8  10  -1    0.32    0.32 
  -8  10  -1    0.00    0.29 
  -9 -10  -1    0.29    0.21 
  -9 -10  -1    0.27    0.33 
   9 -10   1   -0.03    0.24 
  -9 -10  -1    0.07    0.10 
  -9 -10  -1   -0.05    0.09 
  -9  10  -1    0.03    0.36 
  -9  10  -1   -0.11    0.27 
  -9  10  -1    0.03    0.27 
   9  10   1    0.39    0.25 
  -9  10  -1   -0.15    0.29 
  -9  10  -1    0.06    0.28 
 -10 -10  -1   12.29    0.85 
  10 -10   1   13.72    0.97 
 -10 -10  -1   12.31    1.25 
 -10  10  -1   11.64    0.93 
 -10  10  -1   11.50    1.07 
 -10  10  -1   11.98    1.18 
 -10  10  -1   10.48    1.32 
  10  10   1   12.15    0.87 
 -10  10  -1   14.49    1.07 
 -11 -10  -1    0.78    0.48 
 -11 -10  -1    1.15    0.38 
  11 -10   1    1.25    0.46 
 -11  10  -1    1.51    0.48 
 -11  10  -1    0.93    0.54 
 -11  10  -1    1.52    0.53 
  11  10   1    1.41    0.42 
 -11  10  -1    0.51    0.40 
 -11  10  -1    0.76    0.49 
 -12 -10  -1   35.99    1.73 
  12 -10   1   32.40    1.83 
 -12 -10  -1   38.63    2.16 
 -12  10  -1   36.64    1.81 
 -12  10  -1   36.81    1.80 
  12  10   1   36.76    1.78 
 -12  10  -1   38.65    2.03 
 -12  10  -1   36.53    2.07 
 -12  10  -1   37.23    2.38 
  13 -10   1    2.61    0.65 
 -13 -10  -1    1.78    0.68 
 -13 -10  -1    1.86    0.50 
 -13  10  -1    2.63    0.75 
 -13  10  -1    2.57    0.92 
 -13  10  -1    3.22    0.70 
 -14 -10  -1    3.47    0.86 
  14 -10   1    3.78    0.77 
 -14 -10  -1    3.64    0.64 
 -14  10  -1    3.50    1.06 
 -14  10  -1    4.48    0.91 
 -14  10  -1    3.09    0.80 
 -15 -10  -1    0.22    0.34 
  15 -10   1   -0.03    0.44 
 -15 -10  -1    0.37    0.53 
 -15  10  -1   -0.15    0.46 
 -15  10  -1   -0.99    0.35 
 -15  10  -1   -0.15    0.57 
 -16 -10  -1    0.23    0.54 
  16 -10   1    0.46    0.51 
 -16 -10  -1    0.42    0.37 
 -16  10  -1    0.72    0.82 
 -16  10  -1   -0.18    0.48 
 -17 -10  -1    0.87    0.43 
 -17 -10  -1    0.95    0.74 
 -17  10  -1   -0.40    0.61 
 -17  10  -1    0.27    0.55 
  17 -11  -1    0.69    0.67 
 -17 -11   1    0.98    0.50 
  17 -11  -1    1.41    0.66 
 -17 -11   1    2.09    0.84 
 -17  11   1    0.70    0.78 
 -17  11   1    0.24    0.63 
 -16 -11   1    8.06    1.03 
 -16 -11   1    7.64    1.28 
  16 -11  -1    6.82    1.13 
  16 -11  -1    8.87    1.10 
 -16  11   1    8.07    1.54 
 -16  11   1    8.00    1.31 
  15 -11  -1    0.15    0.41 
  15 -11  -1   -0.67    0.37 
 -15 -11   1    0.12    0.38 
 -15 -11   1   -0.09    0.44 
 -15  11   1    0.32    0.63 
 -15  11   1    0.02    0.54 
 -14 -11   1    2.98    0.82 
  14 -11  -1    1.23    0.55 
 -14 -11   1    2.40    0.60 
 -14  11   1    3.48    0.86 
 -14  11   1    2.42    0.89 
  13 -11  -1   -0.19    0.34 
 -13 -11   1   -0.28    0.29 
 -13 -11   1   -0.26    0.38 
  13  11  -1   -0.11    0.36 
 -13  11   1   -0.01    0.38 
 -13  11   1    0.29    0.42 
 -13  11   1    1.00    0.50 
 -13  11   1   -0.05    0.47 
 -13  11   1   -0.06    0.45 
  12 -11  -1    0.98    0.48 
 -12 -11   1   -0.02    0.28 
 -12 -11   1    1.08    0.53 
  12  11  -1   -0.07    0.32 
 -12  11   1    0.36    0.40 
 -12  11   1    0.29    0.47 
 -12  11   1    0.63    0.60 
 -12  11   1    0.90    0.44 
 -12  11   1    0.61    0.44 
  11 -11  -1    1.67    0.54 
 -11 -11   1    1.73    0.59 
 -11 -11   1    1.84    0.46 
 -11  11   1    1.28    0.49 
  11  11  -1    1.16    0.41 
 -11  11   1    1.15    0.43 
 -11  11   1    2.26    0.70 
 -11  11   1    1.65    0.53 
 -11  11   1    0.89    0.52 
 -10 -11   1    2.24    0.31 
  10 -11  -1    2.43    0.57 
 -10 -11   1    0.68    0.35 
 -10 -11   1    1.45    0.51 
 -10 -11   1    2.15    0.31 
 -10  11   1    2.24    0.57 
  10  11  -1    1.57    0.42 
 -10  11   1    1.54    0.64 
 -10  11   1    2.13    0.63 
 -10  11   1    1.58    0.47 
 -10  11   1    3.26    0.64 
  -9 -11   1    2.28    0.31 
   9 -11  -1    2.61    0.51 
  -9 -11   1    2.60    0.32 
  -9 -11   1    1.90    0.43 
  -9 -11   1    2.28    0.55 
  -9  11   1    1.83    0.59 
  -9  11   1    2.11    0.53 
   9  11  -1    2.42    0.47 
  -9  11   1    2.41    0.53 
  -9  11   1    2.68    0.59 
  -9  11   1    2.18    0.55 
  -8 -11   1    5.11    0.39 
  -8 -11   1    5.19    0.40 
   8 -11  -1    4.38    0.60 
  -8 -11   1    6.49    0.68 
  -8 -11   1    3.59    0.61 
   8  11  -1    4.08    0.55 
  -8  11   1    3.56    0.67 
  -8  11   1    4.22    0.65 
  -8  11   1    4.42    0.69 
  -8  11   1    5.39    0.67 
  -8  11   1    6.04    0.92 
  -7 -11   1    4.91    0.38 
  -7 -11   1    4.63    0.65 
   7 -11  -1    5.74    0.62 
  -7 -11   1    4.00    0.50 
   7 -11  -1    6.15    0.76 
  -7 -11   1    5.41    0.39 
  -7 -11   1    4.82    0.65 
   7  11  -1    5.72    0.57 
  -7  11   1    4.84    0.70 
  -7  11   1    5.13    0.68 
  -7  11   1    5.26    0.61 
  -7  11   1    6.60    0.88 
  -7  11   1    4.72    0.68 
  -6 -11   1   32.13    1.50 
  -6 -11   1   31.30    1.21 
  -6 -11   1   30.86    1.36 
   6 -11  -1   33.19    1.55 
  -6 -11   1   31.42    1.48 
   6 -11  -1   32.54    1.41 
  -6 -11   1   32.18    1.21 
  -6  11   1   33.30    1.43 
  -6  11   1   32.24    1.54 
  -6  11   1   32.33    1.67 
  -6  11   1   35.06    1.59 
   6  11  -1   31.00    1.34 
  -6  11   1   32.19    1.54 
  -5 -11   1    0.11    0.19 
   5 -11  -1   -0.02    0.17 
  -5 -11   1    0.16    0.20 
   5 -11  -1   -0.04    0.18 
  -5 -11   1    0.35    0.15 
  -5 -11   1    0.01    0.16 
  -5 -11   1    0.21    0.13 
  -5  11   1    0.16    0.23 
  -5  11   1   -0.15    0.20 
  -5  11   1    0.48    0.25 
  -5  11   1   -0.27    0.17 
   5  11  -1   -0.05    0.16 
  -5  11   1    0.13    0.18 
   5  11  -1    0.15    0.16 
   4 -11  -1   79.06    2.79 
  -4 -11   1   85.12    2.68 
   4 -11  -1   81.31    2.90 
  -4 -11   1   80.88    2.65 
  -4 -11   1   84.81    2.77 
  -4  11   1   80.91    2.77 
  -4  11   1   82.27    2.92 
  -4  11   1   82.90    2.93 
   4  11  -1   83.57    2.75 
  -4  11   1   79.20    2.98 
   4  11  -1   83.12    2.76 
   4  11  -1   86.38    2.76 
  -4  11   1   79.67    2.92 
  -3 -11   1   35.67    1.28 
   3 -11  -1   36.85    1.39 
  -3 -11   1   36.94    1.35 
   3 -11  -1   35.01    1.45 
  -3 -11   1   34.84    1.29 
  -3 -11   1   35.40    1.29 
   3  11  -1   35.51    1.33 
   3  11  -1   37.38    1.34 
  -3  11   1   35.35    1.34 
  -3  11   1   39.36    1.51 
  -3  11   1   35.73    1.46 
  -3  11   1   38.24    1.53 
  -3  11   1   35.32    1.46 
   3  11  -1   33.99    1.33 
  -2 -11   1    6.30    0.35 
  -2 -11   1    5.76    0.38 
   2 -11  -1    6.12    0.45 
   2 -11  -1    5.05    0.38 
  -2 -11   1    6.26    0.37 
  -2 -11   1    6.30    0.37 
   2  11  -1    5.78    0.33 
   2  11  -1    5.51    0.37 
  -2  11   1    5.84    0.36 
   2  11  -1    5.37    0.36 
  -2  11   1    5.68    0.43 
  -2  11   1    5.23    0.42 
   2  11  -1    5.96    0.39 
  -2  11   1    7.18    0.47 
  -2  11   1    5.76    0.45 
   1 -11  -1    0.05    0.11 
  -1 -11   1    0.24    0.11 
   1 -11  -1    0.12    0.12 
  -1 -11   1    0.20    0.12 
  -1 -11   1    0.11    0.11 
   1  11  -1    0.12    0.11 
  -1  11   1    0.16    0.13 
   1  11  -1    0.41    0.14 
  -1  11   1    0.20    0.12 
  -1  11   1   -0.01    0.11 
   1  11  -1    0.09    0.10 
  -1  11   1    0.06    0.09 
   1  11  -1    0.09    0.09 
   0 -11  -1    8.34    0.47 
   0 -11   1    8.94    0.47 
   0 -11   1    9.76    0.48 
   0 -11  -1    8.05    0.45 
   0  11  -1    8.58    0.47 
   0  11   1    9.27    0.47 
   0  11   1    8.51    0.46 
   0  11   1    8.76    0.48 
   0  11  -1    8.90    0.43 
   0  11   1    9.03    0.39 
   0  11  -1    8.49    0.46 
   0  11  -1    8.63    0.46 
   1 -11   1   13.16    0.60 
  -1 -11  -1   12.68    0.57 
   1 -11   1   12.49    0.60 
  -1 -11  -1   13.57    0.59 
  -1  11  -1   12.06    0.57 
  -1  11  -1   10.70    0.58 
  -1  11  -1   13.16    0.62 
   1  11   1   12.89    0.59 
   1  11   1   12.53    0.57 
   1  11   1   12.07    0.56 
   1  11   1   12.75    0.50 
  -1  11  -1   11.65    0.60 
   2 -11   1   29.76    1.12 
  -2 -11  -1   30.07    1.06 
  -2 -11  -1   28.44    1.07 
   2 -11   1   31.46    1.17 
  -2  11  -1   28.15    1.16 
   2  11   1   26.93    1.06 
   2  11   1   27.98    1.06 
   2  11   1   27.36    1.07 
  -2  11  -1   29.88    1.16 
   2  11   1   29.55    1.02 
  -2  11  -1   30.22    1.24 
  -2  11  -1   29.90    1.13 
  -2  11  -1   29.14    1.17 
  -3 -11  -1    0.07    0.14 
  -3 -11  -1    0.43    0.13 
  -3 -11  -1    0.25    0.13 
   3 -11   1    0.61    0.18 
   3 -11   1   -0.03    0.15 
   3  11   1    0.17    0.12 
  -3  11  -1   -0.04    0.17 
  -3  11  -1    0.65    0.21 
  -3  11  -1    0.19    0.18 
   3  11   1    0.39    0.14 
  -3  11  -1    0.27    0.19 
  -3  11  -1    0.51    0.21 
  -4 -11  -1   68.73    2.20 
   4 -11   1   67.30    2.34 
  -4 -11  -1   68.36    2.41 
   4 -11   1   69.34    2.45 
  -4 -11  -1   68.99    2.28 
  -4  11  -1   67.82    2.45 
   4  11   1   68.16    2.30 
  -4  11  -1   68.08    2.48 
   4  11   1   69.13    2.30 
  -4  11  -1   71.23    2.50 
  -4  11  -1   67.46    2.41 
  -4  11  -1   67.06    2.60 
   5 -11   1   14.47    0.86 
  -5 -11  -1   15.68    0.88 
  -5 -11  -1   13.70    0.81 
   5 -11   1   14.57    0.77 
  -5 -11  -1   15.07    0.62 
  -5 -11  -1   14.53    0.71 
  -5  11  -1   15.02    0.88 
  -5  11  -1   14.84    0.99 
  -5  11  -1   14.20    0.83 
  -5  11  -1   16.57    0.91 
   5  11   1   14.96    0.73 
  -5  11  -1   14.80    0.89 
  -6 -11  -1    9.70    0.60 
  -6 -11  -1   10.87    0.49 
  -6 -11  -1   10.39    0.76 
   6 -11   1   12.05    0.81 
  -6 -11  -1    8.87    0.70 
   6 -11   1   10.75    0.67 
  -6 -11  -1   10.90    0.49 
  -6  11  -1   10.14    1.02 
   6  11   1   10.86    0.64 
  -6  11  -1   10.37    0.76 
  -6  11  -1   11.22    0.79 
  -6  11  -1    9.39    0.72 
  -6  11  -1   11.56    0.80 
  -7 -11  -1    2.54    0.46 
  -7 -11  -1    2.90    0.27 
  -7 -11  -1    1.81    0.34 
  -7 -11  -1    2.50    0.25 
  -7 -11  -1    2.14    0.46 
   7 -11   1    2.47    0.40 
   7  11   1    2.51    0.39 
  -7  11  -1    1.77    0.43 
  -7  11  -1    1.95    0.54 
  -7  11  -1    2.61    0.52 
  -7  11  -1    2.98    0.50 
  -7  11  -1    1.33    0.40 
  -8 -11  -1   83.42    2.60 
  -8 -11  -1   85.78    2.91 
  -8 -11  -1   82.38    3.21 
  -8 -11  -1   82.00    2.59 
   8 -11   1   83.67    3.00 
   8  11   1   79.91    2.90 
  -8  11  -1   81.18    3.13 
  -8  11  -1   78.14    3.42 
  -8  11  -1   82.98    3.13 
  -8  11  -1   80.69    3.12 
  -8  11  -1   79.91    3.18 
  -9 -11  -1    1.15    0.18 
  -9 -11  -1    1.31    0.19 
  -9 -11  -1    1.08    0.42 
   9 -11   1    0.80    0.36 
  -9 -11  -1    0.97    0.30 
  -9  11  -1    0.48    0.35 
  -9  11  -1    0.41    0.36 
   9  11   1    1.27    0.34 
  -9  11  -1    0.96    0.50 
  -9  11  -1    1.53    0.48 
  -9  11  -1    1.30    0.43 
 -10 -11  -1    9.11    0.83 
  10 -11   1   10.12    0.97 
 -10 -11  -1    8.66    1.04 
  10  11   1    9.31    0.87 
 -10  11  -1    8.83    1.04 
 -10  11  -1   10.39    1.28 
 -10  11  -1    9.81    1.04 
 -10  11  -1    9.19    0.98 
 -10  11  -1    8.59    0.94 
 -11 -11  -1    0.34    0.27 
  11 -11   1    0.22    0.36 
 -11 -11  -1    0.37    0.40 
 -11  11  -1    0.03    0.33 
  11  11   1    0.48    0.33 
 -11  11  -1    0.39    0.43 
 -11  11  -1    0.02    0.33 
 -11  11  -1    0.17    0.36 
 -11  11  -1    1.31    0.63 
  12 -11   1   12.35    1.20 
 -12 -11  -1   13.42    0.94 
 -12 -11  -1   13.65    1.45 
 -12  11  -1   11.67    1.54 
 -12  11  -1   12.69    1.03 
 -12  11  -1   10.55    1.17 
  12  11   1   13.50    1.03 
 -12  11  -1   11.36    1.29 
 -12  11  -1   11.62    1.13 
  13 -11   1    0.09    0.39 
 -13 -11  -1    0.22    0.30 
 -13 -11  -1    0.13    0.51 
 -13  11  -1    0.18    0.45 
 -13  11  -1    0.96    0.56 
 -13  11  -1   -0.35    0.47 
 -14 -11  -1   -0.12    0.29 
 -14 -11  -1    0.58    0.58 
  14 -11   1    0.64    0.51 
 -14  11  -1   -0.05    0.39 
 -14  11  -1    0.37    0.51 
 -14  11  -1   -0.13    0.63 
 -15 -11  -1    0.11    0.31 
  15 -11   1   -0.16    0.43 
 -15 -11  -1    0.40    0.53 
 -15  11  -1   -0.39    0.63 
 -15  11  -1    0.57    0.58 
 -15  11  -1    0.52    0.52 
  16 -11   1    0.37    0.49 
 -16 -11  -1    1.03    0.64 
 -16 -11  -1    1.20    0.47 
  16 -11   1    1.36    0.75 
 -16  11  -1    2.89    0.86 
 -16  11  -1   -0.49    0.58 
 -17 -11  -1    1.30    0.47 
 -17 -11  -1    0.70    0.64 
 -17  11  -1    0.08    0.60 
 -17  11  -1    0.83    0.85 
 -17 -12   1    2.40    0.86 
 -17 -12   1    3.48    0.69 
  17 -12  -1    3.57    0.95 
  17 -12  -1    1.62    0.62 
 -17  12   1    0.95    0.70 
 -17  12   1    2.89    1.14 
  16 -12  -1    1.67    0.62 
 -16 -12   1    3.11    0.86 
  16 -12  -1    1.69    0.71 
 -16 -12   1    1.98    0.57 
 -16  12   1    2.76    0.87 
 -16  12   1    1.11    0.81 
  15 -12  -1    1.57    0.57 
  15 -12  -1    1.11    0.60 
 -15 -12   1    1.22    0.50 
 -15 -12   1    2.40    0.76 
 -15  12   1    1.37    0.76 
 -15  12   1    1.02    0.76 
 -14 -12   1    3.93    0.69 
  14 -12  -1    3.14    0.78 
 -14 -12   1    4.69    0.96 
 -14  12   1    4.40    0.84 
 -14  12   1    5.72    1.08 
 -14  12   1    3.40    1.02 
 -13 -12   1   -0.13    0.33 
  13 -12  -1    0.49    0.45 
 -13 -12   1    0.17    0.48 
  13  12  -1   -0.26    0.33 
 -13  12   1    0.05    0.40 
 -13  12   1   -0.04    0.36 
 -13  12   1    1.21    0.66 
 -13  12   1    0.13    0.40 
 -13  12   1   -0.24    0.47 
 -12 -12   1   17.98    1.18 
 -12 -12   1   16.63    1.37 
  12 -12  -1   16.97    1.30 
 -12  12   1   19.09    1.96 
 -12  12   1   17.31    1.66 
 -12  12   1   18.13    1.32 
 -12  12   1   19.39    1.37 
 -12  12   1   18.17    1.31 
  12  12  -1   18.97    1.22 
  11 -12  -1    1.56    0.53 
 -11 -12   1    1.56    0.53 
 -11 -12   1    0.57    0.32 
 -11  12   1    1.29    0.50 
 -11  12   1    1.58    0.51 
 -11  12   1    1.48    0.61 
  11  12  -1    0.90    0.39 
 -11  12   1    0.96    0.47 
 -11  12   1    1.60    0.66 
 -10 -12   1   32.93    1.60 
 -10 -12   1   36.93    1.90 
 -10 -12   1   32.76    1.26 
  10 -12  -1   34.85    1.73 
 -10 -12   1   33.08    1.28 
 -10  12   1   34.05    1.81 
 -10  12   1   32.87    1.71 
 -10  12   1   27.79    1.79 
  10  12  -1   32.91    1.60 
 -10  12   1   34.60    1.83 
 -10  12   1   36.17    2.15 
  -9 -12   1    0.63    0.20 
  -9 -12   1    0.26    0.17 
   9 -12  -1    0.18    0.32 
  -9 -12   1    0.42    0.29 
  -9 -12   1    0.41    0.34 
  -9  12   1   -0.08    0.31 
  -9  12   1   -0.02    0.41 
   9  12  -1    0.06    0.26 
  -9  12   1    0.19    0.36 
  -9  12   1    0.34    0.32 
  -9  12   1   -0.02    0.31 
  -8 -12   1   37.88    1.40 
  -8 -12   1   38.85    1.65 
   8 -12  -1   36.61    1.69 
  -8 -12   1   39.85    1.84 
  -8 -12   1   37.71    1.38 
   8  12  -1   37.42    1.61 
  -8  12   1   33.46    1.81 
  -8  12   1   36.75    1.82 
  -8  12   1   35.31    1.69 
  -8  12   1   39.20    1.87 
  -8  12   1   36.57    2.03 
  -7 -12   1    6.01    0.42 
   7 -12  -1    5.20    0.70 
  -7 -12   1    5.32    0.66 
   7 -12  -1    5.17    0.61 
  -7 -12   1    6.02    0.41 
  -7 -12   1    6.14    0.62 
   7  12  -1    5.88    0.61 
  -7  12   1    5.48    0.71 
  -7  12   1    6.34    0.69 
  -7  12   1    6.11    0.76 
  -7  12   1    5.62    0.84 
  -7  12   1    6.52    0.75 
   6 -12  -1    8.61    0.63 
  -6 -12   1    7.29    0.45 
  -6 -12   1    7.90    0.80 
  -6 -12   1    7.26    0.56 
  -6 -12   1    7.26    0.45 
   6 -12  -1    8.52    0.83 
  -6 -12   1    8.66    0.80 
  -6  12   1    9.87    1.01 
  -6  12   1    7.45    0.79 
   6  12  -1    6.65    0.54 
  -6  12   1    7.10    0.59 
  -6  12   1    8.81    0.85 
  -6  12   1    6.41    0.74 
  -5 -12   1    0.17    0.14 
   5 -12  -1    0.43    0.28 
  -5 -12   1    0.47    0.21 
  -5 -12   1    0.28    0.14 
  -5 -12   1    0.59    0.18 
   5 -12  -1    0.52    0.23 
  -5  12   1    0.83    0.30 
  -5  12   1    0.63    0.23 
   5  12  -1    0.53    0.20 
  -5  12   1    0.46    0.27 
  -5  12   1    0.21    0.25 
   5  12  -1    0.18    0.17 
  -5  12   1    0.15    0.25 
   4 -12  -1   21.85    1.00 
  -4 -12   1   19.75    0.86 
  -4 -12   1   21.41    0.88 
  -4 -12   1   21.96    0.96 
   4 -12  -1   22.01    1.10 
  -4 -12   1   20.32    0.87 
   4  12  -1   22.37    0.96 
  -4  12   1   21.75    1.16 
  -4  12   1   21.18    1.09 
  -4  12   1   22.27    0.99 
  -4  12   1   24.95    1.15 
   4  12  -1   23.73    0.98 
   4  12  -1   20.83    0.93 
  -4  12   1   21.46    1.10 
  -3 -12   1   32.20    1.21 
  -3 -12   1   32.17    1.20 
   3 -12  -1   32.25    1.30 
  -3 -12   1   33.09    1.25 
   3 -12  -1   34.22    1.38 
  -3 -12   1   32.29    1.19 
   3  12  -1   30.63    1.23 
   3  12  -1   33.94    1.26 
   3  12  -1   33.45    1.24 
  -3  12   1   33.00    1.25 
   3  12  -1   32.53    1.18 
  -3  12   1   32.12    1.37 
  -3  12   1   31.49    1.37 
  -3  12   1   33.49    1.44 
  -3  12   1   31.31    1.38 
   2 -12  -1    1.08    0.24 
  -2 -12   1    1.29    0.22 
   2 -12  -1    1.47    0.26 
  -2 -12   1    1.24    0.21 
  -2 -12   1    1.85    0.26 
   2  12  -1    1.34    0.19 
  -2  12   1    1.59    0.30 
  -2  12   1    1.23    0.27 
   2  12  -1    1.78    0.26 
  -2  12   1    1.58    0.23 
   2  12  -1    1.05    0.19 
   2  12  -1    1.44    0.23 
  -2  12   1    1.44    0.27 
  -2  12   1    0.93    0.24 
   1 -12  -1    0.72    0.19 
   1 -12  -1    0.78    0.20 
  -1 -12   1    1.00    0.19 
  -1 -12   1    0.93    0.19 
  -1  12   1    0.77    0.16 
   1  12  -1    0.96    0.16 
  -1  12   1    0.69    0.19 
   1  12  -1    0.59    0.16 
   1  12  -1    0.88    0.19 
  -1  12   1    0.80    0.20 
   1  12  -1    1.06    0.21 
  -1  12   1    0.97    0.22 
   0 -12  -1   41.90    1.51 
   0 -12   1   43.62    1.51 
   0 -12  -1   44.27    1.51 
   0 -12   1   42.97    1.50 
   0  12   1   40.25    1.50 
   0  12   1   44.00    1.41 
   0  12   1   41.99    1.52 
   0  12  -1   43.43    1.52 
   0  12  -1   41.39    1.51 
   0  12  -1   41.55    1.45 
   0  12   1   41.49    1.50 
   0  12  -1   42.71    1.51 
  -1 -12  -1    5.91    0.36 
   1 -12   1    5.82    0.38 
   1 -12   1    5.05    0.37 
  -1 -12  -1    5.22    0.36 
  -1  12  -1    5.49    0.39 
  -1  12  -1    5.34    0.36 
  -1  12  -1    4.80    0.38 
   1  12   1    5.72    0.29 
   1  12   1    5.56    0.37 
  -1  12  -1    5.52    0.40 
   1  12   1    5.33    0.36 
   1  12   1    5.35    0.35 
   2 -12   1   76.63    2.53 
   2 -12   1   74.93    2.56 
  -2 -12  -1   75.07    2.48 
  -2 -12  -1   74.90    2.45 
  -2  12  -1   78.59    2.54 
  -2  12  -1   79.49    2.68 
   2  12   1   75.76    2.40 
   2  12   1   74.27    2.48 
   2  12   1   76.32    2.47 
  -2  12  -1   74.32    2.59 
  -2  12  -1   75.04    2.57 
   2  12   1   76.33    2.48 
  -2  12  -1   77.96    2.61 
  -3 -12  -1   -0.09    0.15 
  -3 -12  -1   -0.02    0.10 
   3 -12   1    0.51    0.20 
   3 -12   1    0.07    0.14 
  -3 -12  -1    0.06    0.12 
  -3  12  -1    0.08    0.16 
   3  12   1    0.10    0.12 
  -3  12  -1   -0.15    0.13 
  -3  12  -1    0.12    0.17 
  -3  12  -1    0.38    0.22 
   3  12   1   -0.03    0.11 
  -3  12  -1   -0.08    0.15 
   3  12   1    0.09    0.12 
  -4 -12  -1   64.47    2.15 
  -4 -12  -1   64.54    2.07 
   4 -12   1   65.36    2.22 
  -4 -12  -1   59.91    2.26 
   4 -12   1   65.05    2.32 
   4  12   1   60.31    2.15 
  -4  12  -1   65.40    2.37 
  -4  12  -1   59.53    2.44 
  -4  12  -1   65.79    2.29 
   4  12   1   63.23    2.15 
  -4  12  -1   61.37    2.34 
  -4  12  -1   63.96    2.33 
  -5 -12  -1   28.06    1.03 
   5 -12   1   27.56    1.20 
  -5 -12  -1   28.34    1.31 
  -5 -12  -1   30.74    1.31 
  -5 -12  -1   27.83    1.13 
   5 -12   1   29.16    1.34 
   5  12   1   26.17    1.14 
   5  12   1   28.94    1.16 
  -5  12  -1   27.19    1.45 
  -5  12  -1   31.04    1.37 
  -5  12  -1   27.10    1.34 
  -5  12  -1   28.81    1.36 
  -5  12  -1   29.15    1.30 
   6 -12   1  104.36    3.66 
  -6 -12  -1  100.64    3.62 
  -6 -12  -1  105.21    3.23 
  -6 -12  -1  100.34    3.58 
  -6 -12  -1  102.63    3.39 
   6 -12   1  106.38    3.50 
  -6  12  -1  101.04    3.59 
  -6  12  -1  106.08    3.69 
  -6  12  -1  105.07    3.68 
  -6  12  -1   99.09    3.65 
   6  12   1  103.45    3.42 
  -6  12  -1   98.14    3.85 
  -7 -12  -1    4.94    0.51 
  -7 -12  -1    4.70    0.32 
  -7 -12  -1    5.95    0.70 
  -7 -12  -1    4.35    0.59 
   7 -12   1    5.01    0.58 
  -7  12  -1    5.78    0.73 
  -7  12  -1    4.63    0.66 
  -7  12  -1    5.08    0.67 
   7  12   1    5.54    0.55 
  -7  12  -1    4.81    0.65 
  -7  12  -1    4.58    0.76 
   8 -12   1    1.15    0.36 
  -8 -12  -1    0.82    0.27 
  -8 -12  -1    0.35    0.31 
  -8 -12  -1    0.57    0.15 
  -8  12  -1    0.92    0.38 
  -8  12  -1    0.78    0.37 
  -8  12  -1    0.47    0.34 
   8  12   1    0.99    0.31 
  -8  12  -1    0.78    0.45 
  -8  12  -1    1.20    0.43 
  -9 -12  -1   -0.12    0.33 
  -9 -12  -1   -0.20    0.20 
   9 -12   1    0.24    0.30 
  -9  12  -1    0.08    0.29 
  -9  12  -1    1.13    0.43 
  -9  12  -1    0.32    0.35 
   9  12   1    0.07    0.25 
  -9  12  -1    0.10    0.32 
  -9  12  -1   -0.01    0.36 
  10 -12   1   12.60    0.96 
 -10 -12  -1   11.67    0.81 
 -10 -12  -1   10.84    1.15 
 -10  12  -1   11.50    1.13 
  10  12   1   11.13    0.84 
 -10  12  -1   11.45    1.39 
 -10  12  -1   11.24    1.14 
 -10  12  -1   12.07    1.28 
 -10  12  -1   13.01    1.01 
 -11 -12  -1   -0.23    0.19 
  11 -12   1   -0.51    0.28 
 -11 -12  -1    0.12    0.38 
  11  12   1   -0.04    0.26 
 -11  12  -1   -0.29    0.37 
 -11  12  -1    0.07    0.38 
 -11  12  -1    0.01    0.35 
 -11  12  -1   -0.20    0.33 
 -11  12  -1   -0.23    0.30 
  12 -12   1   18.54    1.32 
 -12 -12  -1   18.78    1.45 
 -12 -12  -1   20.94    1.17 
 -12  12  -1   19.97    1.30 
 -12  12  -1   17.80    1.35 
 -12  12  -1   17.14    1.24 
 -12  12  -1   17.57    1.45 
 -12  12  -1   16.35    1.83 
 -13 -12  -1    2.46    0.77 
 -13 -12  -1    2.50    0.51 
  13 -12   1    1.66    0.60 
 -13  12  -1    2.33    0.75 
 -13  12  -1    2.53    0.69 
 -13  12  -1    2.66    0.83 
 -14 -12  -1    7.09    0.82 
 -14 -12  -1    4.75    0.95 
  14 -12   1    7.56    1.06 
 -14  12  -1    7.39    1.33 
 -14  12  -1    5.92    1.03 
 -14  12  -1    6.42    1.08 
 -15 -12  -1   -0.17    0.52 
 -15 -12  -1    0.04    0.30 
  15 -12   1    0.21    0.49 
 -15  12  -1   -0.70    0.28 
 -15  12  -1   -0.17    0.48 
 -15  12  -1    0.18    0.58 
  16 -12   1   -0.37    0.50 
 -16 -12  -1    0.23    0.58 
 -16 -12  -1   -0.01    0.33 
 -16  12  -1   -0.48    0.44 
 -16  12  -1   -0.59    0.59 
  17 -12   1    0.62    0.54 
 -17 -12  -1    1.26    0.74 
 -17 -12  -1    0.58    0.41 
 -17  12  -1    1.98    0.99 
 -17  12  -1    1.14    0.71 
  17 -13  -1    0.96    0.61 
 -17 -13   1    1.29    0.48 
 -17 -13   1    0.91    0.69 
  17 -13  -1    1.80    0.84 
 -17  13   1    2.34    0.92 
 -17  13   1    1.80    0.93 
  16 -13  -1    4.10    0.99 
 -16 -13   1    5.04    1.06 
 -16 -13   1    5.87    0.82 
  16 -13  -1    5.12    0.90 
 -16  13   1    6.30    1.38 
 -16  13   1    3.70    1.03 
  15 -13  -1    0.42    0.45 
 -15 -13   1    0.15    0.50 
 -15 -13   1   -0.04    0.34 
  15 -13  -1    0.67    0.59 
 -15  13   1   -0.59    0.54 
 -15  13   1   -0.10    0.52 
 -14 -13   1    4.26    0.71 
  14 -13  -1    3.90    0.85 
 -14 -13   1    4.03    0.89 
 -14  13   1    6.88    1.17 
 -14  13   1    6.05    0.97 
 -14  13   1    5.43    1.21 
 -13 -13   1   16.23    1.64 
  13 -13  -1   17.26    1.37 
 -13 -13   1   16.76    1.18 
 -13  13   1   17.88    1.36 
 -13  13   1   17.18    1.79 
  13  13  -1   17.88    1.23 
 -13  13   1   15.24    1.86 
 -13  13   1   18.10    1.37 
 -12 -13   1   -0.35    0.27 
 -12 -13   1   -0.11    0.37 
  12 -13  -1    0.32    0.44 
 -12  13   1    0.68    0.46 
 -12  13   1    0.14    0.55 
 -12  13   1   -0.21    0.41 
  12  13  -1   -0.24    0.32 
 -12  13   1    0.24    0.39 
 -12  13   1    0.16    0.40 
  11 -13  -1    1.04    0.50 
 -11 -13   1    1.31    0.41 
 -11 -13   1    1.76    0.56 
  11  13  -1    1.44    0.44 
 -11  13   1    1.39    0.50 
 -11  13   1    0.66    0.40 
 -11  13   1    2.10    0.60 
 -11  13   1    1.62    0.66 
 -11  13   1    1.46    0.64 
 -10 -13   1    0.97    0.23 
 -10 -13   1    0.80    0.24 
 -10 -13   1    1.68    0.53 
  10 -13  -1    1.55    0.47 
 -10 -13   1    1.29    0.25 
 -10 -13   1    1.26    0.42 
  10  13  -1    1.94    0.47 
 -10  13   1    1.75    0.52 
 -10  13   1    1.65    0.53 
 -10  13   1    1.96    0.62 
 -10  13   1    0.06    0.44 
 -10  13   1    0.60    0.41 
  -9 -13   1   12.68    0.66 
  -9 -13   1   13.12    0.90 
   9 -13  -1   12.48    0.97 
  -9 -13   1   12.93    0.65 
  -9 -13   1   14.16    1.06 
   9  13  -1   12.96    0.88 
  -9  13   1   12.09    0.94 
  -9  13   1   15.00    1.12 
  -9  13   1   11.44    1.14 
  -9  13   1   12.45    1.38 
  -9  13   1   14.14    1.15 
  -8 -13   1    5.87    0.76 
  -8 -13   1    6.05    0.45 
  -8 -13   1    6.75    0.45 
  -8 -13   1    7.85    0.74 
   8 -13  -1    7.43    0.78 
  -8  13   1    6.53    0.84 
  -8  13   1    6.06    0.94 
  -8  13   1    7.87    0.89 
  -8  13   1    7.48    0.90 
  -8  13   1    7.51    0.79 
   8  13  -1    7.32    0.71 
  -7 -13   1   14.37    0.68 
  -7 -13   1   13.11    0.81 
   7 -13  -1   13.67    0.88 
  -7 -13   1   12.87    0.66 
  -7 -13   1   14.18    0.66 
  -7 -13   1   13.28    0.92 
   7 -13  -1   13.68    1.01 
  -7  13   1   13.94    1.00 
  -7  13   1   15.51    1.05 
  -7  13   1   16.00    1.06 
  -7  13   1   13.22    0.88 
   7  13  -1   13.11    0.80 
  -7  13   1   10.89    1.16 
  -6 -13   1   32.84    1.23 
  -6 -13   1   33.67    1.52 
  -6 -13   1   33.58    1.57 
  -6 -13   1   32.11    1.21 
  -6 -13   1   31.55    1.22 
   6 -13  -1   30.03    1.41 
   6 -13  -1   32.54    1.57 
  -6 -13   1   32.31    1.37 
  -6  13   1   31.75    1.43 
  -6  13   1   31.48    1.57 
  -6  13   1   30.20    1.55 
  -6  13   1   33.53    1.60 
   6  13  -1   31.99    1.36 
  -6  13   1   31.47    1.68 
  -5 -13   1    2.74    0.38 
  -5 -13   1    2.23    0.28 
  -5 -13   1    2.56    0.30 
   5 -13  -1    2.24    0.43 
   5 -13  -1    1.93    0.34 
  -5 -13   1    1.99    0.27 
  -5  13   1    2.69    0.47 
  -5  13   1    1.99    0.36 
  -5  13   1    1.68    0.39 
   5  13  -1    2.46    0.37 
   5  13  -1    2.63    0.36 
  -5  13   1    2.99    0.50 
  -5  13   1    2.87    0.54 
   5  13  -1    2.37    0.35 
  -4 -13   1  134.38    4.31 
  -4 -13   1  144.00    4.31 
  -4 -13   1  136.72    4.32 
   4 -13  -1  139.40    4.48 
   4 -13  -1  132.53    4.57 
  -4 -13   1  144.27    4.42 
   4  13  -1  141.00    4.39 
  -4  13   1  130.94    4.57 
   4  13  -1  140.19    4.40 
   4  13  -1  139.02    4.40 
  -4  13   1  140.57    4.63 
  -4  13   1  132.32    4.59 
  -4  13   1  134.45    4.42 
  -4  13   1  136.05    4.69 
   3 -13  -1    4.66    0.53 
  -3 -13   1    3.64    0.37 
  -3 -13   1    4.17    0.33 
   3 -13  -1    4.68    0.47 
  -3 -13   1    3.17    0.33 
  -3  13   1    3.79    0.48 
   3  13  -1    4.41    0.41 
  -3  13   1    4.23    0.53 
  -3  13   1    4.15    0.49 
  -3  13   1    4.24    0.36 
  -3  13   1    4.99    0.55 
   3  13  -1    3.99    0.39 
   3  13  -1    3.91    0.30 
   3  13  -1    4.45    0.36 
  -2 -13   1   20.43    0.86 
   2 -13  -1   21.19    0.92 
  -2 -13   1   22.21    0.90 
  -2 -13   1   20.27    0.86 
   2 -13  -1   21.20    0.97 
   2  13  -1   20.27    0.88 
   2  13  -1   20.68    0.81 
   2  13  -1   21.67    0.90 
  -2  13   1   19.66    0.85 
  -2  13   1   20.33    0.97 
  -2  13   1   21.95    1.01 
  -2  13   1   20.41    0.97 
   2  13  -1   21.69    0.88 
  -2  13   1   21.48    0.99 
   1 -13  -1    9.98    0.55 
  -1 -13   1   10.67    0.53 
  -1 -13   1   10.02    0.54 
   1 -13  -1    9.01    0.55 
   1  13  -1   10.05    0.47 
   1  13  -1   10.69    0.54 
  -1  13   1   10.39    0.59 
  -1  13   1   10.02    0.57 
   1  13  -1    9.82    0.54 
   1  13  -1    9.18    0.52 
  -1  13   1    9.12    0.55 
  -1  13   1    9.83    0.48 
   0 -13  -1   25.41    1.04 
   0 -13   1   25.60    1.02 
   0 -13   1   26.22    1.04 
   0 -13  -1   27.91    1.05 
   0  13  -1   26.22    0.99 
   0  13   1   26.71    1.04 
   0  13   1   26.08    0.94 
   0  13  -1   24.91    1.04 
   0  13  -1   27.74    1.05 
   0  13   1   26.02    1.04 
   0  13  -1   24.30    1.03 
   0  13   1   25.59    1.05 
  -1 -13  -1   16.64    0.75 
  -1 -13  -1   17.29    0.77 
   1 -13   1   18.00    0.79 
   1 -13   1   18.72    0.82 
   1  13   1   17.66    0.78 
  -1  13  -1   18.38    0.82 
  -1  13  -1   18.51    0.82 
   1  13   1   17.31    0.67 
   1  13   1   17.61    0.76 
  -1  13  -1   17.07    0.81 
  -1  13  -1   17.74    0.77 
   1  13   1   18.29    0.77 
  -2 -13  -1   33.20    1.25 
   2 -13   1   32.20    1.32 
  -2 -13  -1   35.98    1.25 
   2 -13   1   34.71    1.31 
   2  13   1   34.22    1.26 
  -2  13  -1   34.81    1.43 
  -2  13  -1   32.03    1.33 
   2  13   1   33.74    1.26 
   2  13   1   33.61    1.17 
   2  13   1   35.18    1.26 
  -2  13  -1   31.76    1.35 
  -2  13  -1   34.84    1.31 
  -2  13  -1   35.63    1.38 
  -3 -13  -1    6.22    0.47 
   3 -13   1    6.21    0.45 
  -3 -13  -1    6.29    0.39 
   3 -13   1    6.10    0.48 
  -3 -13  -1    6.54    0.41 
  -3  13  -1    6.34    0.60 
  -3  13  -1    6.45    0.60 
   3  13   1    5.71    0.40 
  -3  13  -1    6.14    0.47 
   3  13   1    6.80    0.42 
  -3  13  -1    6.25    0.51 
  -3  13  -1    6.46    0.66 
   3  13   1    7.04    0.42 
   4 -13   1   54.35    2.09 
  -4 -13  -1   56.69    1.87 
  -4 -13  -1   54.23    2.06 
   4 -13   1   54.02    2.00 
  -4 -13  -1   56.29    1.93 
  -4  13  -1   56.53    2.27 
  -4  13  -1   54.91    2.11 
  -4  13  -1   55.95    2.07 
  -4  13  -1   53.41    2.13 
   4  13   1   56.14    1.95 
   4  13   1   56.56    1.94 
  -4  13  -1   58.56    2.17 
   5 -13   1    0.72    0.24 
   5 -13   1    1.21    0.33 
  -5 -13  -1    0.53    0.25 
  -5 -13  -1    0.91    0.18 
  -5 -13  -1    1.17    0.24 
  -5  13  -1    0.48    0.28 
  -5  13  -1    0.52    0.27 
   5  13   1    0.85    0.23 
  -5  13  -1    0.94    0.27 
   5  13   1    0.51    0.20 
  -5  13  -1    1.06    0.34 
  -5  13  -1    0.72    0.34 
  -6 -13  -1    8.53    0.69 
   6 -13   1    7.95    0.82 
   6 -13   1    8.73    0.63 
  -6 -13  -1    8.16    0.44 
  -6 -13  -1    8.70    0.80 
  -6 -13  -1    7.04    0.51 
   6  13   1    8.22    0.55 
  -6  13  -1    8.57    0.83 
  -6  13  -1    7.83    0.95 
  -6  13  -1    8.09    0.82 
  -6  13  -1    7.52    0.78 
  -6  13  -1    8.49    0.67 
   7 -13   1   12.24    0.80 
  -7 -13  -1   11.99    0.71 
  -7 -13  -1   12.15    0.88 
  -7 -13  -1   12.87    0.57 
  -7  13  -1   11.65    0.90 
  -7  13  -1   12.00    0.87 
   7  13   1   11.90    0.73 
  -7  13  -1   12.03    0.92 
  -7  13  -1   13.47    0.95 
  -7  13  -1   13.58    1.12 
  -8 -13  -1   30.38    1.34 
  -8 -13  -1   32.11    1.63 
   8 -13   1   31.15    1.48 
  -8 -13  -1   30.92    1.12 
  -8  13  -1   27.91    1.79 
  -8  13  -1   32.70    1.64 
  -8  13  -1   30.15    1.61 
   8  13   1   33.44    1.42 
  -8  13  -1   31.07    1.66 
  -8  13  -1   32.41    1.59 
  -9 -13  -1    0.01    0.21 
  -9 -13  -1    0.16    0.30 
   9 -13   1   -0.13    0.24 
   9  13   1    0.03    0.25 
  -9  13  -1   -0.55    0.24 
  -9  13  -1   -0.04    0.44 
  -9  13  -1    0.08    0.32 
  -9  13  -1   -0.21    0.29 
  -9  13  -1   -0.10    0.30 
  10 -13   1    2.96    0.60 
 -10 -13  -1    2.85    0.63 
 -10 -13  -1    3.05    0.48 
 -10  13  -1    4.18    0.70 
 -10  13  -1    2.86    0.65 
 -10  13  -1    3.41    0.81 
  10  13   1    2.62    0.51 
 -10  13  -1    2.76    0.61 
 -10  13  -1    2.11    0.52 
  11 -13   1    0.23    0.40 
 -11 -13  -1    0.45    0.29 
 -11 -13  -1    0.77    0.49 
 -11  13  -1    0.91    0.46 
 -11  13  -1    0.48    0.43 
  11  13   1    1.24    0.39 
 -11  13  -1    0.31    0.48 
 -11  13  -1    0.54    0.47 
 -11  13  -1    0.96    0.46 
 -12 -13  -1    2.64    0.50 
 -12 -13  -1    3.63    0.79 
  12 -13   1    3.23    0.67 
 -12  13  -1    3.28    0.78 
 -12  13  -1    3.85    0.72 
 -12  13  -1    3.13    0.68 
 -12  13  -1    2.23    0.78 
 -12  13  -1    3.06    0.67 
 -13 -13  -1    2.39    0.50 
  13 -13   1    2.64    0.68 
 -13 -13  -1    2.87    0.77 
 -13  13  -1    2.98    0.73 
 -13  13  -1    2.62    0.91 
 -13  13  -1    2.28    0.72 
 -14 -13  -1   -0.52    0.35 
  14 -13   1    0.47    0.49 
 -14 -13  -1    0.41    0.33 
 -14  13  -1   -0.65    0.38 
 -14  13  -1   -0.28    0.49 
 -14  13  -1    0.25    0.47 
 -15 -13  -1    1.94    0.71 
 -15 -13  -1    2.38    0.53 
  15 -13   1    2.94    0.78 
 -15  13  -1    1.20    0.78 
 -15  13  -1    2.49    0.78 
 -15  13  -1    1.79    0.70 
 -16 -13  -1    1.67    0.47 
 -16 -13  -1    0.37    0.57 
  16 -13   1    1.21    0.71 
 -16  13  -1    0.40    0.65 
 -16  13  -1    1.10    0.81 
  17 -13   1   -0.25    0.47 
 -17 -13  -1    0.93    0.67 
 -17 -13  -1    0.12    0.35 
 -17  13  -1    0.29    0.61 
 -17  13  -1   -0.07    0.61 
 -17 -14   1   -0.33    0.53 
 -17 -14   1    0.26    0.37 
  17 -14  -1    0.49    0.64 
  17 -14  -1    0.46    0.51 
 -17  14   1    0.28    0.74 
 -17  14   1    0.40    0.70 
 -16 -14   1    0.17    0.39 
  16 -14  -1    0.32    0.47 
  16 -14  -1   -0.26    0.49 
 -16 -14   1    0.08    0.54 
 -16  14   1   -0.53    0.69 
 -16  14   1   -0.06    0.56 
  15 -14  -1    1.48    0.59 
 -15 -14   1    1.49    0.48 
 -15 -14   1    1.34    0.61 
  15 -14  -1    0.68    0.61 
 -15  14   1    1.01    0.83 
 -15  14   1    1.21    0.68 
 -14 -14   1    6.21    0.83 
 -14 -14   1    5.97    1.02 
  14 -14  -1    6.10    1.01 
 -14  14   1    7.92    1.41 
 -14  14   1    4.62    1.01 
 -14  14   1    7.24    1.08 
 -13 -14   1    1.53    0.65 
 -13 -14   1    1.54    0.47 
  13 -14  -1    2.10    0.64 
 -13  14   1    1.26    0.57 
 -13  14   1    1.22    0.56 
 -13  14   1    1.21    0.56 
  13  14  -1    2.55    0.59 
 -13  14   1    1.61    0.72 
 -13  14   1    1.59    0.78 
  12 -14  -1   18.46    1.38 
 -12 -14   1   17.39    1.38 
 -12 -14   1   20.20    1.22 
 -12  14   1   18.41    1.31 
 -12  14   1   17.81    1.76 
 -12  14   1   16.41    1.32 
  12  14  -1   18.69    1.21 
 -12  14   1   15.81    1.82 
 -12  14   1   19.94    1.44 
 -11 -14   1    0.00    0.25 
  11 -14  -1   -0.28    0.34 
 -11 -14   1   -0.02    0.37 
 -11  14   1   -0.20    0.31 
 -11  14   1   -0.34    0.35 
 -11  14   1    0.00    0.46 
 -11  14   1   -0.25    0.29 
  11  14  -1    0.15    0.30 
 -11  14   1    0.34    0.48 
  10 -14  -1   26.94    1.55 
 -10 -14   1   28.77    1.15 
 -10 -14   1   27.48    1.42 
 -10 -14   1   28.49    1.13 
 -10 -14   1   26.63    1.15 
 -10 -14   1   28.93    1.65 
 -10  14   1   29.28    1.78 
 -10  14   1   28.22    1.57 
 -10  14   1   29.80    1.71 
 -10  14   1   28.55    1.91 
 -10  14   1   27.15    1.66 
  10  14  -1   26.65    1.41 
  -9 -14   1    1.69    0.27 
  -9 -14   1    2.62    0.57 
   9 -14  -1    1.78    0.46 
  -9 -14   1    1.60    0.40 
  -9 -14   1    2.41    0.31 
  -9 -14   1    2.17    0.31 
  -9  14   1    3.01    0.69 
  -9  14   1    2.74    0.57 
  -9  14   1    3.11    0.68 
   9  14  -1    3.02    0.49 
  -9  14   1    1.94    0.67 
  -9  14   1    1.17    0.48 
   8 -14  -1   39.15    1.79 
  -8 -14   1   39.34    1.44 
  -8 -14   1   40.72    1.43 
  -8 -14   1   39.39    1.67 
  -8 -14   1   43.21    1.91 
  -8 -14   1   36.79    1.43 
  -8  14   1   40.14    1.96 
   8  14  -1   36.54    1.64 
  -8  14   1   36.64    1.89 
  -8  14   1   35.16    2.05 
  -8  14   1   39.69    1.78 
  -8  14   1   33.65    1.87 
  -7 -14   1    0.00    0.21 
  -7 -14   1   -0.03    0.13 
   7 -14  -1    0.18    0.27 
  -7 -14   1   -0.05    0.14 
  -7 -14   1    0.00    0.13 
  -7 -14   1   -0.18    0.15 
  -7  14   1   -0.13    0.24 
  -7  14   1    0.15    0.28 
   7  14  -1   -0.35    0.18 
  -7  14   1    0.07    0.28 
  -7  14   1   -0.08    0.29 
  -7  14   1    0.30    0.24 
  -6 -14   1    4.61    0.49 
  -6 -14   1    5.81    0.42 
  -6 -14   1    5.29    0.41 
   6 -14  -1    6.01    0.75 
   6 -14  -1    5.68    0.63 
  -6 -14   1    5.81    0.40 
   6  14  -1    5.34    0.55 
  -6  14   1    4.45    0.56 
  -6  14   1    5.31    0.70 
  -6  14   1    5.45    0.78 
  -6  14   1    6.06    0.72 
  -6  14   1    4.75    0.66 
   6  14  -1    6.68    0.60 
  -5 -14   1    7.91    0.49 
  -5 -14   1    8.24    0.56 
   5 -14  -1    7.30    0.59 
   5 -14  -1    8.64    0.84 
  -5 -14   1    6.87    0.46 
  -5 -14   1    7.41    0.45 
  -5  14   1    7.96    0.89 
  -5  14   1    7.74    0.57 
   5  14  -1    8.15    0.55 
   5  14  -1    7.13    0.52 
   5  14  -1    8.44    0.57 
  -5  14   1    8.51    0.86 
  -5  14   1    9.24    0.88 
  -5  14   1    8.49    0.82 
  -4 -14   1    0.57    0.17 
  -4 -14   1    0.47    0.21 
   4 -14  -1    0.50    0.26 
  -4 -14   1    0.53    0.18 
   4 -14  -1    0.32    0.21 
   4  14  -1    0.32    0.19 
   4  14  -1    0.99    0.23 
  -4  14   1    0.49    0.24 
  -4  14   1    0.55    0.26 
  -4  14   1    0.54    0.29 
   4  14  -1    0.53    0.17 
   4  14  -1    0.66    0.21 
  -4  14   1    0.75    0.29 
  -4  14   1    0.30    0.20 
   3 -14  -1   55.46    1.99 
   3 -14  -1   52.67    2.05 
  -3 -14   1   55.87    1.93 
  -3 -14   1   51.25    1.87 
  -3 -14   1   53.59    1.87 
  -3  14   1   52.35    2.07 
   3  14  -1   60.06    1.96 
  -3  14   1   52.60    1.91 
   3  14  -1   55.21    1.91 
   3  14  -1   53.86    1.83 
  -3  14   1   55.39    2.08 
  -3  14   1   52.85    2.13 
   3  14  -1   52.60    1.91 
  -3  14   1   54.36    2.08 
   2 -14  -1    2.70    0.36 
  -2 -14   1    3.11    0.34 
  -2 -14   1    3.89    0.38 
   2 -14  -1    3.45    0.42 
  -2  14   1    3.37    0.35 
   2  14  -1    3.39    0.37 
  -2  14   1    2.54    0.39 
  -2  14   1    3.15    0.42 
   2  14  -1    3.96    0.28 
  -2  14   1    3.63    0.44 
   2  14  -1    3.21    0.35 
   2  14  -1    2.91    0.33 
  -2  14   1    2.68    0.40 
   1 -14  -1   10.10    0.61 
  -1 -14   1   10.83    0.57 
  -1 -14   1   11.44    0.60 
   1 -14  -1   12.14    0.62 
   1  14  -1   10.20    0.58 
  -1  14   1   10.36    0.61 
  -1  14   1   11.40    0.64 
  -1  14   1   12.14    0.66 
  -1  14   1   11.23    0.54 
   1  14  -1   12.23    0.54 
   1  14  -1   10.34    0.57 
   1  14  -1   11.78    0.61 
   0 -14  -1   54.97    1.95 
   0 -14   1   57.14    1.95 
   0 -14  -1   57.01    1.93 
   0 -14   1   56.28    1.93 
   0  14   1   54.12    1.95 
   0  14   1   55.47    1.82 
   0  14  -1   55.74    1.94 
   0  14   1   54.17    1.93 
   0  14  -1   55.13    1.95 
   0  14   1   57.35    1.95 
   0  14  -1   54.29    1.93 
   0  14  -1   53.40    1.87 
  -1 -14  -1   48.28    1.71 
  -1 -14  -1   49.58    1.70 
   1 -14   1   47.23    1.71 
   1 -14   1   46.18    1.73 
   1  14   1   49.47    1.72 
   1  14   1   47.94    1.69 
  -1  14  -1   48.46    1.69 
  -1  14  -1   48.20    1.75 
   1  14   1   48.58    1.58 
  -1  14  -1   45.57    1.74 
  -1  14  -1   48.87    1.76 
   1  14   1   46.36    1.69 
  -2 -14  -1    3.03    0.33 
   2 -14   1    2.72    0.35 
  -2 -14  -1    3.10    0.33 
   2 -14   1    3.25    0.38 
  -2  14  -1    3.23    0.40 
  -2  14  -1    3.21    0.37 
   2  14   1    2.75    0.32 
  -2  14  -1    2.92    0.37 
  -2  14  -1    2.65    0.40 
  -2  14  -1    2.26    0.34 
   2  14   1    2.30    0.29 
   2  14   1    2.89    0.27 
   2  14   1    4.00    0.37 
  -3 -14  -1   65.61    2.16 
  -3 -14  -1   63.40    2.20 
   3 -14   1   67.09    2.36 
   3 -14   1   64.01    2.26 
   3  14   1   63.33    2.21 
  -3  14  -1   64.42    2.36 
  -3  14  -1   67.24    2.51 
   3  14   1   64.59    2.21 
  -3  14  -1   63.38    2.37 
  -3  14  -1   64.02    2.38 
  -3  14  -1   65.75    2.30 
   3  14   1   64.57    2.13 
   3  14   1   68.18    2.21 
   4 -14   1  130.42    4.26 
  -4 -14  -1  131.10    4.17 
   4 -14   1  130.29    4.37 
  -4 -14  -1  130.83    4.33 
  -4 -14  -1  129.67    4.10 
  -4 -14  -1  131.69    3.93 
   4  14   1  131.12    4.17 
   4  14   1  129.31    4.18 
  -4  14  -1  132.26    4.32 
  -4  14  -1  130.24    4.42 
  -4  14  -1  134.88    4.40 
  -4  14  -1  134.16    4.58 
  -4  14  -1  130.61    4.42 
  -5 -14  -1   37.59    1.62 
   5 -14   1   36.98    1.54 
   5 -14   1   38.70    1.68 
  -5 -14  -1   39.94    1.46 
  -5 -14  -1   38.90    1.36 
   5  14   1   37.67    1.47 
  -5  14  -1   37.80    1.60 
  -5  14  -1   36.26    1.66 
  -5  14  -1   36.81    1.81 
   5  14   1   39.00    1.46 
  -5  14  -1   36.83    1.68 
  -5  14  -1   37.20    1.69 
  -6 -14  -1   25.09    0.93 
   6 -14   1   22.80    1.26 
  -6 -14  -1   23.22    1.04 
  -6 -14  -1   25.40    1.35 
   6 -14   1   23.10    1.13 
  -6  14  -1   23.89    1.30 
   6  14   1   23.69    1.07 
  -6  14  -1   23.03    1.21 
  -6  14  -1   24.07    1.30 
   6  14   1   25.63    1.09 
  -6  14  -1   20.10    1.36 
  -6  14  -1   22.40    1.27 
  -7 -14  -1    7.59    0.55 
  -7 -14  -1    7.89    0.84 
  -7 -14  -1    6.61    0.41 
   7 -14   1    8.06    0.75 
  -7  14  -1    6.97    0.82 
  -7  14  -1    7.57    0.85 
  -7  14  -1    6.54    0.93 
  -7  14  -1    7.32    0.80 
  -7  14  -1    7.11    0.82 
   7  14   1    7.36    0.65 
  -8 -14  -1    4.05    0.49 
  -8 -14  -1    4.29    0.32 
  -8 -14  -1    3.75    0.63 
   8 -14   1    4.05    0.59 
  -8  14  -1    3.64    0.77 
  -8  14  -1    5.26    0.77 
  -8  14  -1    4.82    0.71 
   8  14   1    4.52    0.55 
  -8  14  -1    4.39    0.69 
  -8  14  -1    3.00    0.59 
  -9 -14  -1    5.74    0.81 
  -9 -14  -1    5.04    0.56 
   9 -14   1    4.86    0.68 
  -9  14  -1    6.55    0.90 
  -9  14  -1    5.33    0.76 
  -9  14  -1    3.80    0.68 
  -9  14  -1    6.60    1.04 
  -9  14  -1    6.39    0.87 
   9  14   1    4.30    0.57 
  10 -14   1    9.94    1.00 
 -10 -14  -1    8.44    1.01 
 -10 -14  -1    8.57    0.68 
  10  14   1    8.39    0.82 
 -10  14  -1    8.96    1.02 
 -10  14  -1    7.76    1.17 
 -10  14  -1    9.38    1.12 
 -10  14  -1   10.48    1.11 
 -10  14  -1    7.14    0.91 
 -11 -14  -1    3.07    0.70 
 -11 -14  -1    4.33    0.56 
  11 -14   1    4.97    0.76 
 -11  14  -1    3.89    0.74 
 -11  14  -1    6.84    0.94 
 -11  14  -1    5.09    1.06 
 -11  14  -1    5.48    0.82 
 -11  14  -1    4.93    0.86 
  11  14   1    5.62    0.70 
 -12 -14  -1   11.18    0.84 
  12 -14   1   11.42    1.16 
 -12 -14  -1   10.66    1.27 
 -12  14  -1   12.04    1.30 
 -12  14  -1   12.59    1.40 
 -12  14  -1    9.52    1.09 
 -12  14  -1   11.15    1.55 
 -12  14  -1   10.66    1.14 
  13 -14   1    5.53    0.92 
 -13 -14  -1    5.06    0.67 
 -13 -14  -1    6.77    1.09 
 -13  14  -1    6.75    1.25 
 -13  14  -1    7.53    1.07 
 -13  14  -1    5.26    1.02 
 -14 -14  -1    3.55    0.58 
 -14 -14  -1    4.10    0.95 
  14 -14   1    5.09    0.92 
 -14  14  -1    3.95    0.93 
 -14  14  -1    3.51    0.85 
 -14  14  -1    3.47    1.02 
 -15 -14  -1    0.42    0.54 
 -15 -14  -1    0.24    0.30 
  15 -14   1    1.10    0.60 
 -15  14  -1    0.76    0.59 
 -15  14  -1    0.43    0.64 
 -15  14  -1    1.02    0.67 
 -16 -14  -1    1.37    0.77 
 -16 -14  -1    1.86    0.49 
  16 -14   1    2.29    0.77 
 -16  14  -1    1.71    0.76 
 -16  14  -1    2.70    0.79 
 -16  14  -1    1.49    0.87 
 -17 -14  -1    1.59    0.51 
 -17 -14  -1    0.83    0.77 
  17 -14   1    0.93    0.59 
 -17  14  -1    0.28    0.68 
 -17  14  -1    1.42    0.96 
  17 -15  -1    0.01    0.53 
  17 -15  -1    0.69    0.67 
 -17 -15   1   -0.11    0.50 
 -17  15   1    0.16    0.69 
 -17  15   1    0.35    0.68 
 -16 -15   1    2.79    0.61 
 -16 -15   1    2.83    0.88 
  16 -15  -1    3.12    0.78 
  16 -15  -1    3.13    0.87 
 -16  15   1    4.07    1.03 
 -16  15   1    2.21    0.99 
 -15 -15   1    2.52    0.74 
 -15 -15   1    3.45    0.63 
  15 -15  -1    2.49    0.80 
  15 -15  -1    2.44    0.68 
 -15  15   1    1.98    0.86 
 -15  15   1    2.37    0.85 
  14 -15  -1   10.01    1.26 
 -14 -15   1    9.16    0.96 
 -14 -15   1    8.96    1.22 
 -14  15   1   10.31    1.59 
 -14  15   1    9.64    1.25 
 -14  15   1    9.56    1.39 
  13 -15  -1   22.39    1.59 
 -13 -15   1   19.56    1.26 
 -13 -15   1   21.56    1.59 
 -13  15   1   23.01    1.59 
  13  15  -1   21.71    1.36 
 -13  15   1   21.87    2.27 
 -13  15   1   23.01    1.56 
 -13  15   1   17.59    1.83 
 -13  15   1   21.47    1.50 
  12 -15  -1    0.95    0.49 
 -12 -15   1    0.68    0.46 
 -12 -15   1    0.72    0.39 
 -12  15   1    0.04    0.42 
  12  15  -1    0.09    0.36 
 -12  15   1    0.47    0.54 
 -12  15   1    0.88    0.70 
 -12  15   1   -0.11    0.43 
 -12  15   1    0.57    0.47 
  11 -15  -1   16.04    1.20 
 -11 -15   1   15.52    1.24 
 -11 -15   1   18.64    1.11 
 -11  15   1   12.33    1.31 
 -11  15   1   18.95    1.47 
 -11  15   1   15.93    1.17 
 -11  15   1   16.41    1.52 
 -11  15   1   11.97    1.57 
  11  15  -1   18.33    1.13 
 -10 -15   1    2.56    0.61 
 -10 -15   1    1.46    0.28 
 -10 -15   1    1.58    0.41 
  10 -15  -1    1.01    0.46 
 -10  15   1    1.44    0.54 
 -10  15   1    0.97    0.64 
 -10  15   1    0.93    0.51 
  10  15  -1    1.55    0.41 
 -10  15   1    1.74    0.53 
 -10  15   1    1.00    0.51 
  -9 -15   1    1.42    0.46 
   9 -15  -1    1.80    0.51 
  -9 -15   1    2.02    0.42 
  -9 -15   1    1.73    0.28 
  -9 -15   1    2.34    0.32 
  -9 -15   1    2.04    0.31 
  -9  15   1    2.78    0.54 
  -9  15   1    1.56    0.54 
  -9  15   1    2.23    0.61 
  -9  15   1    1.80    0.56 
  -9  15   1    1.33    0.61 
   9  15  -1    1.88    0.44 
  -8 -15   1    4.07    0.39 
  -8 -15   1    3.79    0.65 
  -8 -15   1    3.56    0.50 
  -8 -15   1    4.12    0.42 
   8 -15  -1    3.23    0.55 
  -8 -15   1    3.58    0.39 
  -8  15   1    3.88    0.80 
  -8  15   1    3.97    0.74 
   8  15  -1    3.67    0.53 
  -8  15   1    4.60    0.66 
  -8  15   1    3.78    0.68 
  -8  15   1    3.92    0.70 
  -7 -15   1    0.24    0.23 
  -7 -15   1    0.45    0.19 
   7 -15  -1    0.48    0.31 
  -7 -15   1    0.51    0.20 
  -7  15   1   -0.18    0.29 
   7  15  -1    0.55    0.25 
   7  15  -1    0.43    0.26 
  -7  15   1    1.07    0.34 
  -7  15   1    0.62    0.38 
  -7  15   1    0.34    0.34 
  -7  15   1    0.70    0.37 
   6 -15  -1   72.15    2.72 
   6 -15  -1   70.82    2.87 
  -6 -15   1   71.22    2.45 
  -6 -15   1   71.90    2.46 
  -6 -15   1   72.03    2.59 
  -6 -15   1   73.39    2.43 
   6  15  -1   73.57    2.60 
  -6  15   1   77.03    2.93 
  -6  15   1   71.92    3.02 
  -6  15   1   71.23    2.88 
  -6  15   1   78.56    2.73 
  -6  15   1   70.16    2.87 
   6  15  -1   74.14    2.61 
  -5 -15   1   16.34    0.83 
  -5 -15   1   16.23    0.75 
   5 -15  -1   15.77    1.01 
  -5 -15   1   14.90    0.73 
   5 -15  -1   16.17    0.90 
  -5  15   1   15.38    1.00 
  -5  15   1   16.08    0.87 
   5  15  -1   15.61    0.82 
  -5  15   1   17.11    1.10 
  -5  15   1   14.98    0.97 
   5  15  -1   14.38    0.78 
  -5  15   1   15.16    0.99 
   4 -15  -1   24.87    1.25 
  -4 -15   1   25.58    1.02 
  -4 -15   1   25.63    1.02 
  -4 -15   1   24.14    1.07 
   4 -15  -1   23.62    1.14 
   4  15  -1   24.61    1.07 
  -4  15   1   24.74    1.25 
  -4  15   1   24.59    1.25 
  -4  15   1   24.64    1.25 
   4  15  -1   25.23    1.00 
  -4  15   1   23.69    1.08 
   4  15  -1   23.84    1.06 
   4  15  -1   24.30    1.06 
  -4  15   1   24.49    1.33 
   3 -15  -1    0.16    0.18 
  -3 -15   1    0.15    0.14 
  -3 -15   1    0.03    0.14 
   3 -15  -1    0.03    0.19 
   3  15  -1    0.03    0.12 
  -3  15   1    0.04    0.18 
  -3  15   1    0.12    0.19 
   3  15  -1    0.18    0.16 
   3  15  -1   -0.14    0.11 
  -3  15   1    0.33    0.18 
  -3  15   1   -0.09    0.19 
  -3  15   1    0.11    0.19 
   3  15  -1   -0.07    0.12 
  -2 -15   1   42.00    1.57 
   2 -15  -1   41.44    1.64 
   2 -15  -1   43.38    1.71 
  -2 -15   1   45.72    1.62 
  -2  15   1   41.94    1.71 
   2  15  -1   45.22    1.60 
  -2  15   1   42.85    1.56 
  -2  15   1   41.84    1.70 
  -2  15   1   42.09    1.74 
  -2  15   1   42.93    1.72 
   2  15  -1   43.27    1.51 
   2  15  -1   45.23    1.62 
   2  15  -1   46.93    1.63 
  -1 -15   1   31.19    1.20 
   1 -15  -1   31.41    1.24 
   1 -15  -1   29.20    1.26 
  -1 -15   1   32.20    1.22 
   1  15  -1   30.69    1.22 
  -1  15   1   29.33    1.25 
  -1  15   1   31.53    1.28 
   1  15  -1   30.90    1.20 
  -1  15   1   28.33    1.12 
   1  15  -1   30.32    1.20 
   1  15  -1   30.54    1.13 
  -1  15   1   29.18    1.25 
   0 -15  -1   21.06    0.92 
   0 -15   1   21.77    0.93 
   0 -15  -1   21.16    0.95 
   0 -15   1   21.33    0.94 
   0  15  -1   21.21    0.88 
   0  15  -1   21.75    0.95 
   0  15  -1   21.25    0.93 
   0  15   1   20.84    0.95 
   0  15   1   21.30    0.94 
   0  15   1   20.98    0.93 
   0  15   1   21.43    0.83 
   0  15  -1   21.09    0.94 
   1 -15   1   44.26    1.60 
   1 -15   1   42.80    1.57 
  -1 -15  -1   44.40    1.57 
  -1 -15  -1   41.77    1.53 
  -1  15  -1   41.51    1.53 
  -1  15  -1   39.83    1.59 
   1  15   1   41.00    1.54 
   1  15   1   44.81    1.58 
  -1  15  -1   42.83    1.61 
   1  15   1   41.67    1.42 
  -1  15  -1   40.52    1.59 
   1  15   1   39.54    1.52 
  -2 -15  -1    9.91    0.54 
  -2 -15  -1   10.10    0.56 
   2 -15   1   10.21    0.63 
   2 -15   1    9.70    0.58 
  -2  15  -1    9.96    0.65 
   2  15   1   10.60    0.48 
   2  15   1   10.59    0.57 
  -2  15  -1   10.25    0.64 
   2  15   1   10.80    0.56 
  -2  15  -1   10.04    0.68 
   2  15   1   10.61    0.57 
  -2  15  -1    9.72    0.64 
  -2  15  -1    8.72    0.57 
   3 -15   1    3.20    0.43 
  -3 -15  -1    3.78    0.36 
   3 -15   1    3.57    0.42 
  -3 -15  -1    3.63    0.38 
  -3  15  -1    3.04    0.44 
   3  15   1    3.51    0.32 
   3  15   1    3.33    0.35 
  -3  15  -1    3.86    0.44 
   3  15   1    3.75    0.40 
  -3  15  -1    3.60    0.52 
  -3  15  -1    3.84    0.50 
   3  15   1    3.91    0.39 
  -3  15  -1    3.50    0.49 
  -4 -15  -1   19.73    0.86 
  -4 -15  -1   18.60    0.98 
   4 -15   1   16.97    0.90 
  -4 -15  -1   19.05    0.66 
  -4 -15  -1   19.35    0.81 
   4 -15   1   17.14    0.99 
  -4  15  -1   17.45    1.01 
  -4  15  -1   18.52    1.12 
  -4  15  -1   20.38    1.07 
   4  15   1   18.17    0.85 
   4  15   1   18.55    0.86 
  -4  15  -1   18.91    1.02 
  -4  15  -1   17.52    0.94 
  -5 -15  -1   31.87    1.50 
  -5 -15  -1   34.25    1.26 
   5 -15   1   37.04    1.60 
  -5 -15  -1   33.82    1.35 
   5 -15   1   32.99    1.44 
  -5  15  -1   32.95    1.58 
  -5  15  -1   35.71    1.52 
  -5  15  -1   33.94    1.74 
   5  15   1   34.86    1.37 
   5  15   1   34.27    1.37 
  -5  15  -1   33.64    1.59 
  -5  15  -1   36.62    1.61 
   6 -15   1   -0.15    0.24 
  -6 -15  -1    0.12    0.17 
   6 -15   1   -0.06    0.21 
  -6 -15  -1    0.20    0.14 
  -6  15  -1    0.29    0.27 
  -6  15  -1    0.16    0.24 
   6  15   1    0.16    0.18 
   6  15   1    0.34    0.20 
  -6  15  -1    0.14    0.25 
  -6  15  -1    0.06    0.26 
  -6  15  -1    0.41    0.38 
  -7 -15  -1   16.60    0.87 
  -7 -15  -1   16.55    0.73 
   7 -15   1   15.92    0.97 
   7  15   1   16.68    0.89 
  -7  15  -1   17.14    1.31 
  -7  15  -1   18.52    1.17 
   7  15   1   16.84    0.90 
  -7  15  -1   18.15    1.09 
  -7  15  -1   17.74    1.16 
  -7  15  -1   17.35    1.15 
  -8 -15  -1   49.19    1.88 
  -8 -15  -1   47.03    1.64 
   8 -15   1   51.29    2.09 
  -8 -15  -1   51.70    2.20 
   8  15   1   49.82    1.92 
  -8  15  -1   47.00    2.24 
  -8  15  -1   46.76    2.20 
  -8  15  -1   45.90    2.45 
  -8  15  -1   45.89    2.19 
  -8  15  -1   45.45    2.11 
   9 -15   1   -0.22    0.25 
  -9 -15  -1    0.21    0.22 
  -9 -15  -1   -0.11    0.29 
  -9  15  -1   -0.37    0.29 
  -9  15  -1    0.33    0.36 
   9  15   1   -0.06    0.22 
  -9  15  -1   -0.18    0.30 
  -9  15  -1   -0.24    0.28 
  -9  15  -1   -0.74    0.37 
 -10 -15  -1    1.78    0.52 
  10 -15   1    2.68    0.58 
 -10 -15  -1    2.33    0.42 
 -10  15  -1    2.85    0.65 
  10  15   1    2.57    0.49 
 -10  15  -1    2.61    0.64 
 -10  15  -1    2.95    0.78 
 -10  15  -1    2.69    0.66 
 -10  15  -1    2.88    0.61 
 -11 -15  -1    2.26    0.62 
 -11 -15  -1    2.72    0.48 
  11 -15   1    3.60    0.71 
  11  15   1    3.35    0.57 
 -11  15  -1    3.19    0.69 
 -11  15  -1    2.15    0.66 
 -11  15  -1    3.34    0.70 
 -11  15  -1    4.00    0.94 
 -11  15  -1    1.82    0.57 
  12 -15   1    0.55    0.46 
 -12 -15  -1    0.56    0.30 
 -12 -15  -1    1.12    0.55 
 -12  15  -1    0.54    0.57 
 -12  15  -1    0.37    0.47 
 -12  15  -1    0.42    0.46 
 -12  15  -1    0.87    0.51 
 -12  15  -1    1.55    0.62 
 -13 -15  -1    4.21    0.83 
  13 -15   1    2.34    0.68 
 -13 -15  -1    1.74    0.41 
 -13  15  -1    2.78    0.72 
 -13  15  -1    1.91    0.81 
 -13  15  -1    1.13    0.64 
  14 -15   1    0.38    0.47 
 -14 -15  -1    1.00    0.37 
 -14 -15  -1    0.77    0.57 
 -14  15  -1    1.13    0.67 
 -14  15  -1    1.62    0.59 
 -14  15  -1    0.59    0.71 
  15 -15   1    1.92    0.70 
 -15 -15  -1    1.82    0.47 
 -15 -15  -1    1.78    0.74 
 -15  15  -1    1.76    0.82 
 -15  15  -1    1.92    0.69 
 -15  15  -1    1.40    0.68 
 -16 -15  -1    0.96    0.42 
  16 -15   1    1.15    0.74 
 -16 -15  -1    2.53    0.83 
 -16  15  -1    1.62    0.89 
 -16  15  -1    2.57    0.81 
 -16  15  -1    3.49    0.97 
 -16 -16   1    0.85    0.41 
 -16 -16   1    0.68    0.59 
  16 -16  -1    1.52    0.82 
  16 -16  -1    1.03    0.56 
 -16  16   1    1.25    0.74 
 -16  16   1    0.89    0.84 
 -15 -16   1    2.58    0.60 
 -15 -16   1    1.96    0.73 
  15 -16  -1    1.74    0.75 
 -15  16   1    2.50    0.71 
 -15  16   1    1.99    0.91 
 -15  16   1    1.67    0.78 
  14 -16  -1    0.41    0.53 
 -14 -16   1    0.73    0.51 
 -14 -16   1   -0.34    0.27 
 -14  16   1    0.19    0.46 
 -14  16   1    0.03    0.55 
 -14  16   1    0.59    0.65 
 -13 -16   1    0.48    0.44 
 -13 -16   1    0.58    0.36 
  13 -16  -1    0.51    0.50 
  13  16  -1    1.05    0.48 
 -13  16   1    1.07    0.57 
 -13  16   1    1.41    0.75 
 -13  16   1    1.56    0.61 
 -13  16   1    0.91    0.55 
 -13  16   1    0.68    0.64 
 -12 -16   1    2.96    0.74 
 -12 -16   1    1.86    0.46 
  12 -16  -1    2.56    0.68 
 -12  16   1    2.50    0.70 
  12  16  -1    1.77    0.49 
 -12  16   1    1.60    0.55 
 -12  16   1    1.21    0.68 
 -12  16   1    1.81    0.71 
 -12  16   1    1.10    0.58 
  11 -16  -1    0.61    0.43 
 -11 -16   1   -0.02    0.37 
 -11 -16   1    0.31    0.30 
 -11  16   1    0.27    0.39 
 -11  16   1    0.49    0.53 
  11  16  -1    0.35    0.35 
 -11  16   1    0.46    0.44 
 -11  16   1    0.42    0.43 
 -11  16   1    0.16    0.46 
 -10 -16   1    6.84    0.73 
 -10 -16   1    8.32    1.02 
  10 -16  -1    9.34    1.03 
 -10  16   1    7.86    1.05 
 -10  16   1    8.18    0.97 
  10  16  -1    8.37    0.84 
 -10  16   1    7.36    1.17 
 -10  16   1    7.59    1.11 
 -10  16   1    9.22    1.11 
  -9 -16   1    0.04    0.16 
  -9 -16   1   -0.18    0.22 
   9 -16  -1    0.25    0.34 
  -9 -16   1    0.01    0.33 
  -9 -16   1    0.01    0.16 
  -9  16   1    0.64    0.44 
  -9  16   1    0.96    0.58 
  -9  16   1    0.44    0.43 
  -9  16   1    1.29    0.52 
  -9  16   1   -0.02    0.28 
   9  16  -1    0.49    0.29 
  -8 -16   1   15.96    0.78 
  -8 -16   1   17.88    0.98 
   8 -16  -1   15.08    1.07 
  -8 -16   1   16.32    0.79 
  -8  16   1   16.88    1.23 
  -8  16   1   16.58    1.19 
  -8  16   1   15.14    1.03 
  -8  16   1   16.79    1.60 
   8  16  -1   18.02    0.99 
  -8  16   1   16.13    1.23 
  -7 -16   1    0.06    0.21 
   7 -16  -1    0.09    0.27 
  -7 -16   1    0.24    0.18 
  -7 -16   1    0.21    0.18 
   7  16  -1    0.10    0.22 
  -7  16   1   -0.12    0.21 
  -7  16   1   -0.28    0.27 
  -7  16   1   -0.03    0.33 
   7  16  -1    0.08    0.23 
  -7  16   1   -0.05    0.30 
  -7  16   1    0.12    0.35 
  -6 -16   1   22.96    0.95 
  -6 -16   1   23.99    1.08 
  -6 -16   1   20.68    0.93 
   6 -16  -1   18.79    1.23 
   6 -16  -1   21.69    1.16 
  -6  16   1   20.94    1.12 
  -6  16   1   22.25    1.41 
   6  16  -1   22.05    1.06 
  -6  16   1   20.56    1.27 
  -6  16   1   21.82    1.30 
  -6  16   1   22.02    1.29 
   6  16  -1   20.26    1.03 
  -5 -16   1    0.08    0.15 
   5 -16  -1    0.19    0.26 
  -5 -16   1   -0.22    0.15 
   5 -16  -1    0.16    0.23 
  -5 -16   1   -0.04    0.13 
  -5  16   1   -0.11    0.24 
   5  16  -1    0.30    0.20 
   5  16  -1   -0.08    0.14 
   5  16  -1    0.14    0.17 
  -5  16   1    0.22    0.21 
  -5  16   1    0.67    0.31 
  -5  16   1    0.48    0.30 
  -5  16   1    0.14    0.27 
   4 -16  -1    0.12    0.26 
  -4 -16   1    0.44    0.20 
   4 -16  -1    0.50    0.24 
  -4 -16   1    0.35    0.17 
   4  16  -1    0.49    0.21 
   4  16  -1    0.28    0.16 
  -4  16   1    0.30    0.27 
  -4  16   1    0.54    0.22 
  -4  16   1    0.23    0.23 
  -4  16   1    0.51    0.28 
  -4  16   1    0.30    0.25 
   4  16  -1    0.21    0.17 
   4  16  -1    0.53    0.21 
   3 -16  -1   50.29    1.94 
   3 -16  -1   52.69    2.04 
  -3 -16   1   51.48    1.86 
  -3 -16   1   51.49    1.83 
   3  16  -1   51.71    1.87 
  -3  16   1   50.04    2.03 
   3  16  -1   50.78    1.85 
   3  16  -1   50.36    1.86 
  -3  16   1   50.34    2.09 
  -3  16   1   54.23    2.06 
   3  16  -1   52.54    1.77 
  -3  16   1   50.07    2.03 
  -3  16   1   49.48    1.85 
  -2 -16   1    5.86    0.42 
   2 -16  -1    6.53    0.64 
   2 -16  -1    6.67    0.49 
  -2 -16   1    6.45    0.46 
  -2  16   1    6.51    0.62 
  -2  16   1    6.13    0.62 
  -2  16   1    7.14    0.54 
   2  16  -1    6.53    0.47 
  -2  16   1    6.84    0.65 
  -2  16   1    6.48    0.44 
   2  16  -1    5.55    0.42 
   2  16  -1    6.33    0.40 
   2  16  -1    5.96    0.45 
   1 -16  -1   42.49    1.62 
  -1 -16   1   45.56    1.62 
  -1 -16   1   40.94    1.57 
   1 -16  -1   42.57    1.66 
   1  16  -1   42.15    1.60 
  -1  16   1   41.41    1.65 
  -1  16   1   42.75    1.66 
   1  16  -1   43.02    1.59 
  -1  16   1   42.55    1.52 
   1  16  -1   44.09    1.62 
  -1  16   1   44.09    1.68 
   1  16  -1   42.05    1.51 
   0 -16   1   10.22    0.60 
   0 -16   1   10.36    0.59 
   0 -16  -1   11.64    0.61 
   0 -16  -1    9.35    0.59 
   0  16   1   10.09    0.61 
   0  16  -1   10.67    0.61 
   0  16   1   10.41    0.61 
   0  16   1   10.53    0.62 
   0  16  -1    9.38    0.53 
   0  16  -1   10.22    0.60 
   0  16  -1   10.75    0.62 
   0  16   1   10.88    0.52 
  -1 -16  -1    0.30    0.16 
   1 -16   1    0.30    0.19 
   1 -16   1    0.32    0.16 
  -1 -16  -1    0.27    0.17 
   1  16   1    0.22    0.15 
  -1  16  -1    0.23    0.17 
  -1  16  -1    0.13    0.14 
   1  16   1    0.19    0.14 
  -1  16  -1    0.06    0.16 
   1  16   1    0.22    0.16 
   1  16   1    0.04    0.10 
  -1  16  -1    0.24    0.18 
   2 -16   1    7.51    0.56 
   2 -16   1    7.07    0.51 
  -2 -16  -1    8.08    0.51 
  -2 -16  -1    8.39    0.50 
  -2  16  -1    9.02    0.60 
  -2  16  -1    8.24    0.54 
  -2  16  -1    8.23    0.58 
   2  16   1    7.36    0.49 
  -2  16  -1    8.04    0.58 
   2  16   1    8.05    0.51 
   2  16   1    7.41    0.41 
   2  16   1    8.33    0.52 
  -2  16  -1    6.74    0.67 
   3 -16   1   50.12    1.93 
  -3 -16  -1   49.19    1.78 
  -3 -16  -1   49.33    1.74 
   3 -16   1   50.82    1.86 
   3  16   1   48.18    1.77 
  -3  16  -1   46.15    2.02 
   3  16   1   48.78    1.78 
  -3  16  -1   49.63    1.97 
  -3  16  -1   49.84    1.87
[truncated: 6,310,090 more chars]
